# Supplementary material
Source: PubMed Central journal article supplement (PMC4357496)
Supplement: NIHMS403299-supplement-Supplemental_Tables.pdf [file NIHMS403299-supplement-Supplemental_Tables.pdf]

**Supplementary Table 1**

| Gene Symbol | Score  | Entrez Gene | Accession # | Catalog #   | pSQTQ | DDR protein |
|-------------|--------|-------------|-------------|-------------|-------|-------------|
| ABCB4       | Strong | 5244        | NM_000443   | M-007302-00 |       |             |
| ADRB3       | Strong | 155         | NM_000025   | M-005427-00 |       |             |
| ASB17       | Strong | 127247      | NM_080868   | M-015284-00 |       |             |
| ATR         | Strong | 545         | NM_001184   | M-003202-04 |       | ATR         |
| BECN1       | Strong | 8678        | NM_003766   | M-010552-00 |       |             |
| C6ORF211    | Strong | 79624       | NM_024573   | M-014372-00 |       |             |
| C7ORF20     | Strong | 51608       | NM_015949   | M-020967-00 |       |             |
| DHX9        | Strong | 1660        | NM_001357   | M-009950-00 | YES   | DHX9        |
| FKSG17      | Strong | 83955       | NM_032031   | M-014770-00 |       |             |
| GAD1        | Strong | 2571        | NM_000817   | M-010121-00 |       |             |
| HNRPM       | Strong | 4670        | NM_005968   | M-013452-00 |       |             |
| HTR2B       | Strong | 3357        | NM_000867   | M-005639-02 |       |             |
| INPP5B      | Strong | 3633        | NM_005540   | M-021811-01 |       |             |
| IRAK2       | Strong | 3656        | NM_001570   | M-004761-00 |       |             |
| LIPA        | Strong | 3988        | NM_000235   | M-004043-01 |       |             |
| LOC150759   | Strong | 150759      | NM_175853   | M-017982-00 |       |             |
| LOC166752   | Strong | 166752      | XM_094074   | M-024053-00 |       |             |
| LOC221140   | Strong | DC          | XM_167908   | M-021677-00 |       |             |
| LOC340359   | Strong | 340359      | XM_294387   | M-025931-00 |       |             |
| LOC375108   | Strong | 375108      | NM_198996   | M-027278-00 |       |             |
| LOC387821   | Strong | DC          | XM_373518   | M-029826-00 |       |             |
| LOC388171   | Strong | DC          | XM_373647   | M-030485-00 |       |             |
| LOC388228   | Strong | 388228      | XM_370948   | M-027174-00 |       |             |
| LOC389101   | Strong | 389101      | XM_371622   | M-028088-00 |       |             |
| LOC390502   | Strong | 390502      | XM_372532   | M-030366-00 |       |             |
| LOC400526   | Strong | DC          | XM_375344   | M-030743-00 |       |             |
| MGC16943    | Strong | 112479      | NM_080663   | M-015252-00 |       |             |
| MGC27085    | Strong | 151827      | NM_153353   | M-016744-00 |       |             |
| NRF1        | Strong | 4899        | NM_005011   | M-017924-00 |       |             |
| NUBP2       | Strong | 10101       | NM_012225   | M-004705-00 |       |             |
| PHGDHL1     | Strong | 337867      | NM_177967   | M-017914-00 |       |             |
| PLS1        | Strong | 5357        | NM_002670   | M-011356-00 |       |             |
| PMS2        | Strong | 5395        | NM_000535   | M-010032-00 |       | PMS2        |
| PTAFR       | Strong | 5724        | NM_000952   | M-005709-00 |       |             |
| RAB34       | Strong | 83871       | NM_031934   | M-009735-00 |       |             |
| SENP2       | Strong | 59343       | NM_021627   | M-006033-00 |       |             |
| SERPINA12   | Strong | 145264      | NM_173850   | M-008739-00 |       |             |
| ST7L        | Strong | 54879       | NM_017744   | M-017234-00 |       |             |
| TAF9L       | Strong | 51616       | NM_015975   | M-017217-00 |       |             |
| TCERG1L     | Strong | 256536      | NM_174937   | M-017916-00 |       |             |
| ABCA6       | Medium | 23460       | NM_080284   | M-008535-00 |       |             |
| ABHD1       | Medium | 84696       | NM_032604   | M-013589-00 |       |             |
| ABTB2       | Medium | 25841       | NM_145804   | M-016671-00 |       |             |
| ACTC        | Medium | 70          | NM_005159   | M-012015-00 |       |             |
| ADAMTS16    | Medium | 170690      | NM_139056   | M-005767-01 |       |             |
| ADNP        | Medium | 23394       | NM_015339   | M-012857-00 | YES   |             |
| ADPRTL1     | Medium | 143         | NM_006437   | M-007244-00 |       |             |
| AGPAT3      | Medium | 56894       | NM_020132   | M-008620-00 |       |             |
| ALDH2       | Medium | 217         | NM_000690   | M-009766-00 |       |             |
| ALPL        | Medium | 249         | NM_000478   | M-008658-00 |       |             |

|             |        |        |           |             |     |        |
|-------------|--------|--------|-----------|-------------|-----|--------|
| APRIN       | Medium | 23047  | NM_015032 | M-010362-00 | YES |        |
| ARL2BP      | Medium | 23568  | NM_012106 | M-013074-00 | YES |        |
| ASH2L       | Medium | 9070   | NM_004674 | M-019831-00 |     |        |
| ATF3        | Medium | 467    | NM_001674 | M-008663-00 |     |        |
| BCL10       | Medium | 8915   | NM_003921 | M-004381-01 |     |        |
| BOMB        | Medium | 80014  | NM_024949 | M-016585-00 |     |        |
| BRCA2       | Medium | 675    | NM_000059 | M-003462-00 | YES | BRCA2  |
| BRE         | Medium | 9577   | NM_004899 | M-010210-01 |     | BRE    |
| BRIP1       | Medium | 83990  | NM_032043 | M-010587-00 |     | BRIP1  |
| BTG1        | Medium | 694    | NM_001731 | M-011598-00 |     |        |
| C10ORF1     | Medium | 11241  | NM_206995 | M-019504-00 |     |        |
| C11ORF11    | Medium | 747    | NM_006133 | M-012209-00 |     |        |
| C14ORF25    | Medium | 319089 | XM_375077 | M-021942-00 |     |        |
| C2ORF4      | Medium | 51072  | NM_015955 | M-016087-00 |     |        |
| C6ORF18     | Medium | 54535  | NM_019052 | M-020481-00 |     |        |
| C6ORF70     | Medium | 55780  | XM_376556 | M-028653-00 |     |        |
| CAPN7       | Medium | 23473  | NM_014296 | M-005807-00 |     |        |
| CASP14      | Medium | 23581  | NM_012114 | M-004403-00 |     |        |
| CAT         | Medium | 847    | NM_001752 | M-010021-00 |     |        |
| CD160       | Medium | 11126  | NM_007053 | M-019771-00 |     |        |
| CD8B1       | Medium | 926    | NM_004931 | M-011975-00 |     |        |
| CDC16       | Medium | 8881   | NM_003903 | M-003223-02 |     |        |
| CDC37       | Medium | 11140  | NM_007065 | M-003231-01 |     |        |
| CDH17       | Medium | 1015   | NM_004063 | M-011829-00 |     |        |
| CDH22       | Medium | 64405  | NM_021248 | M-013099-00 |     |        |
| CDH9        | Medium | 1007   | NM_016279 | M-013169-00 |     |        |
| CDKN1A      | Medium | 1026   | NM_000389 | M-003471-00 |     | CDKN1A |
| CDS1        | Medium | 1040   | NM_001263 | M-008680-00 |     |        |
| CHCHD6      | Medium | 84303  | NM_032343 | M-014866-00 |     |        |
| CKAP1       | Medium | 1155   | NM_001281 | M-020186-00 | YES |        |
| CKAP4       | Medium | 10970  | NM_006825 | M-012755-00 |     |        |
| CKS1B       | Medium | 1163   | NM_001826 | M-004586-01 |     |        |
| CKS2        | Medium | 1164   | NM_001827 | M-007678-00 |     |        |
| CLDN10      | Medium | 9071   | NM_006984 | M-019255-00 |     |        |
| CLIC1       | Medium | 1192   | NM_001288 | M-009530-00 |     |        |
| CLOCK       | Medium | 9575   | NM_004898 | M-008212-00 |     |        |
| COG7        | Medium | 91949  | NM_153603 | M-015904-00 |     |        |
| COX7A3      | Medium | 1348   | NM_183003 | M-019464-00 |     |        |
| CPN2        | Medium | 1370   | J05158    | M-023553-00 |     |        |
| CPVL        | Medium | 54504  | NM_019029 | M-005828-00 |     |        |
| CSTF3       | Medium | 1479   | NM_001326 | M-011247-00 |     |        |
| CTSL2       | Medium | 1515   | NM_001333 | M-005842-02 |     |        |
| CXORF20     | Medium | 139105 | NM_153346 | M-016795-00 |     |        |
| CYP11A1     | Medium | 1583   | NM_000781 | M-008329-00 |     |        |
| DGAT2L3     | Medium | 158833 | XM_088691 | M-010304-00 |     |        |
| DJ167A19.1  | Medium | 54432  | NM_018982 | M-016906-00 |     |        |
| DKFZP434B16 | Medium | 25896  | NM_015434 | M-013972-00 |     |        |
| DKFZP564D13 | Medium | 84064  | NM_032124 | M-018592-00 |     |        |
| DKFZP686O16 | Medium | 341405 | NM_182608 | M-018900-00 |     |        |
| DKFZP761O20 | Medium | 92293  | XM_044062 | M-027086-00 |     |        |
| DLAD        | Medium | 58511  | NM_021233 | M-008278-00 |     |        |
| DLEU2       | Medium | 8847   | NM_006021 | M-020066-00 |     |        |
| DMC1        | Medium | 11144  | NM_007068 | M-009551-00 |     | DMC1   |

|           |        |        |           |             |     |        |
|-----------|--------|--------|-----------|-------------|-----|--------|
| DNAH7     | Medium | 56171  | NM_018897 | M-009928-00 |     |        |
| DNMT3B    | Medium | 1789   | NM_006892 | M-006395-01 |     |        |
| DPP6      | Medium | 1804   | NM_001936 | M-010129-00 |     |        |
| DRB1      | Medium | 129831 | NM_152945 | M-016718-00 |     |        |
| DSG2      | Medium | 1829   | NM_001943 | M-011645-00 |     |        |
| EBF       | Medium | 1879   | NM_024007 | M-011848-00 |     |        |
| EBF2      | Medium | 64641  | NM_022659 | M-013842-00 |     |        |
| EDG1      | Medium | 1901   | NM_001400 | M-003655-01 |     |        |
| EIF1AY    | Medium | 9086   | NM_004681 | M-011908-00 |     |        |
| EPHB3     | Medium | 2049   | NM_004443 | M-003123-02 |     |        |
| EPHB4     | Medium | 2050   | NM_004444 | M-003124-01 |     |        |
| ERCC5     | Medium | 2073   | NM_000123 | M-006626-00 |     | ERCC5  |
| EREG      | Medium | 2069   | NM_001432 | M-011268-00 |     |        |
| F3        | Medium | 2152   | NM_001993 | M-004462-00 |     |        |
| FADS1     | Medium | 3992   | NM_013402 | M-008210-00 |     |        |
| FANCL     | Medium | 55120  | NM_018062 | M-021486-00 |     | FANCL  |
| FBXW11    | Medium | 23291  | NM_012300 | M-003490-00 |     | FBXW11 |
| FCMD      | Medium | 2218   | NM_006731 | M-012313-00 |     |        |
| FKBP6     | Medium | 8468   | NM_003602 | M-009426-00 |     |        |
| FLJ11767  | Medium | 79645  | NM_024593 | M-016476-00 |     |        |
| FLJ12671  | Medium | 81875  | NM_030980 | M-014692-00 |     |        |
| FLJ22329  | Medium | 79709  | NM_024656 | M-018152-00 |     |        |
| FLJ22938  | Medium | 79729  | NM_024676 | M-016447-00 |     |        |
| FLJ23221  | Medium | 79630  | NM_024579 | M-014374-00 |     |        |
| FLJ23703  | Medium | 200197 | NM_182534 | M-018885-00 |     |        |
| FLJ25224  | Medium | 120406 | NM_182495 | M-018588-00 |     |        |
| FLJ26184  | Medium | 388289 | NM_207385 | M-032063-00 |     |        |
| FLJ30002  | Medium | 124222 | NM_152341 | M-007910-00 |     |        |
| FLJ35424  | Medium | 285492 | NM_173661 | M-018114-00 |     |        |
| FLJ36561  | Medium | 150248 | NM_182520 | M-018678-00 |     |        |
| FLJ37874  | Medium | 338699 | NM_182603 | M-018873-00 |     |        |
| FLJ40113  | Medium | 374650 | NM_198079 | M-031731-00 |     |        |
| FLJ42393  | Medium | 401105 | NM_207488 | M-032177-00 |     |        |
| FLJ45121  | Medium | 400556 | NM_207451 | M-032136-00 |     |        |
| FLJ46365  | Medium | 401459 | NM_207504 | M-032187-00 |     |        |
| FMN2      | Medium | 56776  | XM_371352 | M-022134-00 | YES |        |
| FUCA1     | Medium | 2517   | NM_000147 | M-009023-00 |     |        |
| GALNT7    | Medium | 51809  | NM_017423 | M-013402-00 |     |        |
| GCLM      | Medium | 2730   | NM_002061 | M-011670-00 |     |        |
| GLI3      | Medium | 2737   | NM_000168 | M-011043-00 |     |        |
| GOLGA2    | Medium | 2801   | NM_004486 | M-017282-00 |     |        |
| GPX5      | Medium | 2880   | NM_001509 | M-009445-00 |     |        |
| GRIN2A    | Medium | 2903   | NM_000833 | M-006195-00 |     |        |
| GSTO1     | Medium | 9446   | NM_004832 | M-011950-00 |     |        |
| HAVCR1    | Medium | 26762  | NM_012206 | M-019856-01 |     |        |
| HCCA2     | Medium | 81532  | NM_053005 | M-019362-00 |     |        |
| HERC1     | Medium | 8925   | NM_003922 | M-007181-01 | YES |        |
| HESX1     | Medium | 8820   | NM_003865 | M-019521-00 |     |        |
| HIST1H2BH | Medium | 8345   | NM_003524 | M-011444-00 |     |        |
| HLXB9     | Medium | 3110   | NM_005515 | M-010960-00 |     |        |
| HNRPL     | Medium | 3191   | NM_001533 | M-011293-00 |     |        |
| HRLP5     | Medium | 117245 | NM_054108 | M-010293-00 |     |        |
| IDH1      | Medium | 3417   | NM_005896 | M-008294-00 |     |        |

|              |        |        |             |             |     |  |
|--------------|--------|--------|-------------|-------------|-----|--|
| IFNA21       | Medium | 3452   | NM_002175   | M-019654-00 |     |  |
| IFNGR2       | Medium | 3460   | NM_005534   | M-012713-00 |     |  |
| IL13RA1      | Medium | 3597   | NM_001560   | M-007933-01 |     |  |
| IL16         | Medium | 3603   | NM_004513   | M-007936-01 |     |  |
| ILF2         | Medium | 3608   | NM_004515   | M-017599-00 | YES |  |
| IMP5         | Medium | 162540 | NM_175882   | M-005928-00 |     |  |
| IPLA2(GAMMA) | Medium | 50640  | XM_291241   | M-010284-00 |     |  |
| IRAK3        | Medium | 11213  | NM_007199   | M-004762-00 |     |  |
| ITGB7        | Medium | 3695   | NM_000889   | M-008013-01 |     |  |
| KCNH4        | Medium | 23415  | NM_012285   | M-006234-01 |     |  |
| KIAA0748     | Medium | 9840   | XM_374983   | M-021265-00 |     |  |
| KIAA1679     | Medium | 80731  | XM_046570   | M-022909-00 |     |  |
| KIAA1912     | Medium | 114800 | XM_055636   | M-022684-00 |     |  |
| KIF1B        | Medium | 23095  | NM_015074   | M-009317-00 |     |  |
| KLK1         | Medium | 3816   | NM_002257   | M-005906-00 |     |  |
| KPNA3        | Medium | 3839   | NM_002267   | M-011306-00 |     |  |
| KRTAP11-1    | Medium | 337880 | NM_175858   | M-017999-00 |     |  |
| KRTAP5-1     | Medium | 387264 | NM_00100592 | M-032497-00 |     |  |
| LCT          | Medium | 3938   | NM_002299   | M-011717-00 |     |  |
| LMAN2        | Medium | 10960  | NM_006816   | M-019905-00 |     |  |
| LOC119694    | Medium | 119694 | XM_061626   | M-026821-00 |     |  |
| LOC129642    | Medium | 129642 | NM_138799   | M-010299-00 |     |  |
| LOC130940    | Medium | 130940 | NM_138803   | M-018279-00 |     |  |
| LOC148213    | Medium | 148213 | NM_138286   | M-015352-00 |     |  |
| LOC148898    | Medium | 148898 | NM_138479   | M-031726-00 |     |  |
| LOC150051    | Medium | 150051 | XM_097792   | M-024363-00 |     |  |
| LOC151256    | Medium | DC     | XM_087141   | M-023117-00 |     |  |
| LOC155036    | Medium | 155036 | XM_376722   | M-028875-00 |     |  |
| LOC253039    | Medium | 253039 | BC052374    | M-032270-00 |     |  |
| LOC256223    | Medium | 256223 | XM_170840   | M-023341-00 |     |  |
| LOC283604    | Medium | DC     | XM_211088   | M-022005-00 |     |  |
| LOC284546    | Medium | 284546 | XM_209252   | M-021794-00 |     |  |
| LOC285331    | Medium | 285331 | XM_376238   | M-028111-00 |     |  |
| LOC285889    | Medium | 285889 | XM_379535   | M-028753-00 |     |  |
| LOC286009    | Medium | 286009 | XM_376665   | M-028925-00 |     |  |
| LOC286144    | Medium | 286144 | XM_379592   | M-029342-00 |     |  |
| LOC339803    | Medium | 339803 | XM_379098   | M-027847-00 |     |  |
| LOC339862    | Medium | 339862 | XM_376212   | M-028079-00 |     |  |
| LOC340017    | Medium | 340017 | XM_379288   | M-028274-00 |     |  |
| LOC340843    | Medium | 340843 | XM_291726   | M-026400-00 |     |  |
| LOC387718    | Medium | 387718 | XM_370582   | M-029689-00 |     |  |
| LOC388001    | Medium | DC     | XM_373599   | M-030312-00 |     |  |
| LOC388002    | Medium | 388002 | XM_373600   | M-030313-00 |     |  |
| LOC388142    | Medium | DC     | XM_373638   | M-030440-00 |     |  |
| LOC388160    | Medium | 388160 | XM_370894   | M-030559-00 |     |  |
| LOC388361    | Medium | DC     | XM_371034   | M-030937-00 |     |  |
| LOC388454    | Medium | DC     | XM_373770   | M-031006-00 |     |  |
| LOC388624    | Medium | DC     | XM_371244   | M-027463-00 |     |  |
| LOC388642    | Medium | 388642 | XM_371261   | M-027404-00 |     |  |
| LOC388929    | Medium | DC     | XM_371480   | M-027811-00 |     |  |
| LOC389250    | Medium | DC     | XM_374101   | M-028302-00 |     |  |
| LOC389428    | Medium | 389428 | XM_371846   | M-028596-00 |     |  |
| LOC389541    | Medium | 389541 | XM_371939   | M-028918-00 |     |  |

|              |        |    |        |             |             |     |      |
|--------------|--------|----|--------|-------------|-------------|-----|------|
| LOC390299    | Medium |    | 390299 | XM_372452   | M-030139-00 |     |      |
| LOC392586    | Medium | DC |        | XM_373398   | M-031680-00 |     |      |
| LOC392791    | Medium | DC |        | XM_374752   | M-029140-00 |     |      |
| LOC399818    | Medium |    | 399818 | NM_212554   | M-032543-00 |     |      |
| LOC399844    | Medium |    | 399844 | XM_374858   | M-029930-00 |     |      |
| LOC400121    | Medium |    | 400121 | XM_375018   | M-030216-00 |     |      |
| LOC400301    | Medium | DC |        | XM_375150   | M-030530-00 |     |      |
| LOC400479    | Medium | DC |        | XM_375282   | M-030767-00 |     |      |
| LOC400714    | Medium | DC |        | XM_375639   | M-031138-00 |     |      |
| LOC400733    | Medium | DC |        | XM_378835   | M-027390-00 |     |      |
| LOC400950    | Medium |    | 400950 | XM_376049   | M-027830-00 |     |      |
| LOC401222    | Medium |    | 401222 | XM_379380   | M-028560-00 |     |      |
| LOC401293    | Medium | DC |        | XM_376558   | M-028730-00 |     |      |
| LOC401440    | Medium | DC |        | XM_379539   | M-029252-00 |     |      |
| LOC91614     | Medium |    | 91614  | NM_139160   | M-016878-00 |     |      |
| LRRK2        | Medium |    | 120892 | XM_058513   | M-006323-00 |     |      |
| LYPLAL1      | Medium |    | 127018 | NM_138794   | M-008388-00 |     |      |
| MADD         | Medium |    | 8567   | NM_003682   | M-004429-01 |     |      |
| MAGEA2B      | Medium |    | 266740 | NM_153488   | M-019148-00 |     |      |
| MAGEB1       | Medium |    | 4112   | NM_002363   | M-011325-00 |     |      |
| MBL2         | Medium |    | 4153   | NM_000242   | M-011080-00 |     |      |
| MBTPS1       | Medium |    | 8720   | NM_003791   | M-005939-01 |     |      |
| METTL3       | Medium |    | 56339  | NM_019852   | M-005170-00 | YES |      |
| MGC:13379    | Medium |    | 51259  | NM_016499   | M-017173-00 |     |      |
| MGC26717     | Medium |    | 285237 | NM_173824   | M-009016-00 |     |      |
| MGC4170      | Medium |    | 79158  | NM_024312   | M-031144-00 |     |      |
| MGC71806     | Medium |    | 374378 | NM_198516   | M-031763-00 |     |      |
| MIR (MARCH8) | Medium |    | 220972 | NM_145021   | M-007161-01 |     |      |
| MIR16        | Medium |    | 51573  | NM_016641   | M-009233-00 |     |      |
| MLANA        | Medium |    | 2315   | NM_005511   | M-012715-00 |     |      |
| MMAB         | Medium |    | 326625 | NM_052845   | M-015137-00 |     |      |
| MMP2         | Medium |    | 4313   | NM_004530   | M-005959-02 |     |      |
| MSH2         | Medium |    | 4436   | NM_000251   | M-003909-01 | YES | MSH2 |
| MST1R        | Medium |    | 4486   | NM_002447   | M-003157-02 |     |      |
| MTB          | Medium |    | 54892  | NM_017760   | M-018283-00 |     |      |
| MTP          | Medium |    | 4547   | NM_000253   | M-008301-00 |     |      |
| MUC5B        | Medium |    | 4587   | XM_039877   | M-026763-00 |     |      |
| MYO10        | Medium |    | 4651   | NM_012334   | M-007217-00 |     |      |
| MYOD1        | Medium |    | 4654   | NM_002478   | M-010316-00 |     |      |
| NALP14       | Medium |    | 338323 | NM_176822   | M-019075-00 |     |      |
| NDUFB3       | Medium |    | 4709   | NM_002491   | M-019604-00 |     |      |
| NET-5        | Medium |    | 10867  | NM_006675   | M-012293-00 |     |      |
| NFE2L3       | Medium |    | 9603   | NM_004289   | M-009308-00 |     |      |
| NOTCH2       | Medium |    | 4853   | NM_024408   | M-012235-00 |     |      |
| NUDT14       | Medium |    | 256281 | NM_177533   | M-009076-00 |     |      |
| OIT3         | Medium |    | 170392 | NM_152635   | M-016942-00 |     |      |
| OR10K1       | Medium |    | 391109 | NM_00100447 | M-032412-00 |     |      |
| OR51G2       | Medium |    | 81282  | NM_00100523 | M-032428-00 |     |      |
| OR6V1        | Medium |    | 346517 | NM_00100166 | M-032315-00 |     |      |
| OS-9         | Medium |    | 10956  | NM_006812   | M-010811-00 |     |      |
| P2RX3        | Medium |    | 5024   | NM_002559   | M-006284-00 |     |      |
| PABPC4       | Medium |    | 8761   | NM_003819   | M-011528-00 |     |      |
| PAFAH2       | Medium |    | 5051   | NM_000437   | M-008583-01 |     |      |

|          |        |        |           |             |     |        |
|----------|--------|--------|-----------|-------------|-----|--------|
| PAR6G    | Medium | 84552  | NM_032510 | M-014909-00 |     |        |
| PCDH18   | Medium | 54510  | NM_019035 | M-013372-00 |     |        |
| PCDHA2   | Medium | 56146  | NM_018905 | M-013260-00 |     |        |
| PDE1A    | Medium | 5136   | NM_005019 | M-007641-00 |     |        |
| PDE3B    | Medium | 5140   | NM_000922 | M-007646-01 |     |        |
| PDE5A    | Medium | 8654   | NM_001083 | M-007667-02 |     |        |
| PDE6D    | Medium | 5147   | NM_002601 | M-004310-02 |     |        |
| PDIR     | Medium | 10954  | NM_006810 | M-019826-00 |     |        |
| PER1     | Medium | 5187   | NM_002616 | M-011350-00 | YES |        |
| PEX14    | Medium | 5195   | NM_004565 | M-012676-00 |     |        |
| PHLDA1   | Medium | 22822  | NM_007350 | M-012389-00 |     |        |
| PHTF2    | Medium | 57157  | NM_020432 | M-013848-00 |     |        |
| PIAS3    | Medium | 10401  | NM_006099 | M-004164-01 |     |        |
| PLEC1    | Medium | 5339   | NM_000445 | M-003945-01 | YES |        |
| PLEKHM1  | Medium | 9842   | NM_014798 | M-023203-00 |     |        |
| PODXL    | Medium | 5420   | NM_005397 | M-010617-00 |     |        |
| PON1     | Medium | 5444   | NM_000446 | M-009229-00 |     |        |
| PORCN    | Medium | 64840  | NM_022825 | M-009613-00 |     |        |
| PPARB    | Medium | 5469   | NM_004774 | M-004126-03 | YES |        |
| PPGB     | Medium | 5476   | NM_000308 | M-006004-00 |     |        |
| PPM1L    | Medium | 151742 | NM_139245 | M-008679-00 |     |        |
| PPP1R2   | Medium | 5504   | NM_006241 | M-015361-00 |     |        |
| PPP2CA   | Medium | 5515   | NM_002715 | M-003598-00 |     | PPP2CA |
| PQLC1    | Medium | 80148  | NM_025078 | M-018387-00 |     |        |
| PRICKLE2 | Medium | 166336 | NM_198859 | M-023495-00 |     |        |
| PRKAG2   | Medium | 51422  | NM_016203 | M-009693-00 | YES |        |
| PSCD1    | Medium | 9267   | NM_004762 | M-011926-00 |     |        |
| PTP4A2   | Medium | 8073   | NM_003479 | M-009078-00 |     |        |
| PTPRO    | Medium | 5800   | NM_002848 | M-008500-01 |     |        |
| RAB43    | Medium | 339122 | XM_290714 | M-028161-00 |     |        |
| RAB6B    | Medium | 51560  | NM_016577 | M-008548-00 |     |        |
| RAB9P1   | Medium | 9366   | NR_000039 | M-032266-00 |     |        |
| RAP1B    | Medium | 5908   | NM_015646 | M-010364-01 |     |        |
| RASSF1   | Medium | 11186  | NM_007182 | M-017219-00 |     |        |
| RBM15    | Medium | 64783  | NM_022768 | M-010854-00 | YES |        |
| RBMS1    | Medium | 5937   | NM_002897 | M-011377-00 |     |        |
| RFX2     | Medium | 5990   | NM_000635 | M-011129-00 |     |        |
| RGL1     | Medium | 23179  | NM_015149 | M-008387-00 |     |        |
| RNASE1   | Medium | 6035   | NM_002933 | M-015643-00 |     |        |
| RP42     | Medium | 54165  | NM_020640 | M-019139-00 |     |        |
| RPS27L   | Medium | 51065  | NM_015920 | M-013231-00 |     |        |
| SBDS     | Medium | 51119  | NM_016038 | M-019217-00 |     |        |
| SCGB1A1  | Medium | 7356   | NM_003357 | M-016680-00 |     |        |
| SEPT11   | Medium | 55752  | NM_018243 | M-020249-00 |     |        |
| SF1      | Medium | 7536   | NM_004630 | M-012662-00 |     |        |
| SH3GLB2  | Medium | 56904  | NM_020145 | M-015810-00 |     |        |
| SHFM1    | Medium | 7979   | NM_006304 | M-021353-00 |     | SHFM1  |
| SLC22A9  | Medium | 114571 | NM_080866 | M-007460-00 |     |        |
| SLC25A12 | Medium | 8604   | NM_003705 | M-007471-00 |     |        |
| SLC2A1   | Medium | 6513   | NM_006516 | M-007509-01 | YES |        |
| SMBP     | Medium | 56889  | NM_020123 | M-010220-00 |     |        |
| SMC5L1   | Medium | 23137  | NM_015110 | M-014117-00 |     | SMC5L1 |
| SMCR8    | Medium | 140775 | NM_144775 | M-017373-00 |     |        |

|          |        |        |           |             |     |       |
|----------|--------|--------|-----------|-------------|-----|-------|
| SMNDC1   | Medium | 10285  | NM_005871 | M-016257-00 |     |       |
| SQLE     | Medium | 6713   | NM_003129 | M-009646-00 |     |       |
| SQRDL    | Medium | 58472  | NM_021199 | M-008271-00 |     |       |
| SREB3    | Medium | 54328  | NM_018969 | M-005727-01 |     |       |
| SRPK2    | Medium | 6733   | NM_182691 | M-004839-01 |     |       |
| STAC     | Medium | 6769   | NM_003149 | M-019732-00 |     |       |
| STK22D   | Medium | 83942  | NM_032028 | M-005038-02 |     |       |
| TAB3     | Medium | 257397 | NM_152787 | M-015572-00 |     |       |
| TFAP2B   | Medium | 7021   | NM_003221 | M-017730-00 |     |       |
| TFF1     | Medium | 7031   | NM_003225 | M-003715-00 |     |       |
| TNFRSF19 | Medium | 55504  | NM_018647 | M-008098-00 |     |       |
| TOR2A    | Medium | 27433  | NM_130459 | M-015292-00 |     |       |
| TPBG     | Medium | 7162   | NM_006670 | M-004304-00 |     |       |
| TPTE     | Medium | 7179   | NM_013315 | M-008745-01 |     |       |
| TRAG3    | Medium | 9598   | NM_004909 | M-005212-00 |     |       |
| TRAM1    | Medium | 23471  | NM_014294 | M-018676-00 |     |       |
| TRAP1    | Medium | 10131  | NM_016292 | M-010104-00 |     |       |
| TRAPPC6B | Medium | 122553 | NM_177452 | M-018297-00 |     |       |
| TUBA8    | Medium | 51807  | NM_018943 | M-009374-00 |     |       |
| TULP2    | Medium | 7288   | NM_003323 | M-011414-00 |     |       |
| UBE2J2   | Medium | 118424 | NM_058167 | M-008614-00 |     |       |
| UGT2B15  | Medium | 7366   | NM_001076 | M-020194-00 |     |       |
| UROD     | Medium | 7389   | NM_000374 | M-013415-00 |     |       |
| USP11    | Medium | 8237   | NM_004651 | M-006063-00 |     | USP11 |
| VCL      | Medium | 7414   | NM_003373 | M-009288-00 |     |       |
| VKORC1L1 | Medium | 154807 | NM_173517 | M-018539-00 |     |       |
| WASF1    | Medium | 8936   | NM_003931 | M-011557-00 |     |       |
| WDR40B   | Medium | 139170 | NM_178470 | M-017873-00 |     |       |
| WFDC2    | Medium | 10406  | NM_006103 | M-010564-00 |     |       |
| WISP1    | Medium | 8840   | NM_003882 | M-010555-00 |     |       |
| WNT3A    | Medium | 89780  | NM_033131 | M-008538-00 |     |       |
| ZFP36L1  | Medium | 677    | NM_004926 | M-011816-00 |     |       |
| ZMYND10  | Medium | 51364  | NM_015896 | M-021401-00 |     |       |
| ZNF215   | Medium | 7762   | NM_013250 | M-020661-00 |     |       |
| ZNF223   | Medium | 7766   | NM_013361 | M-006592-00 |     |       |
| ZNF26    | Medium | 7574   | NM_019591 | M-021443-00 |     |       |
| ZNF307   | Medium | 387032 | NM_019110 | M-032209-00 | YES |       |
| ZNF514   | Medium | 84874  | NM_032788 | M-014996-00 |     |       |
| ZNF619   | Medium | 285267 | NM_173656 | M-018125-00 |     |       |
| ACTA2    | Weak+  | 59     | NM_001613 | M-003450-00 |     |       |
| ACTL6    | Weak+  | 51412  | NM_016188 | M-009422-01 |     |       |
| ACTR10   | Weak+  | 55860  | NM_018477 | M-020824-00 |     |       |
| ACTR1B   | Weak+  | 10120  | NM_005735 | M-012075-00 |     |       |
| ADAM30   | Weak+  | 11085  | NM_021794 | M-005759-00 |     |       |
| ADAMTS15 | Weak+  | 170689 | NM_139055 | M-005766-01 |     |       |
| ADAMTS4  | Weak+  | 9507   | NM_005099 | M-003807-00 |     |       |
| AKAP8    | Weak+  | 10270  | NM_005858 | M-009656-01 |     |       |
| ALS2CR14 | Weak+  | 65068  | NM_178231 | M-018351-00 |     |       |
| ALS2CR8  | Weak+  | 79800  | NM_024744 | M-015280-00 |     |       |
| AMELY    | Weak+  | 266    | NM_001143 | M-011205-00 |     |       |
| APG4D    | Weak+  | 84971  | NM_032885 | M-005790-00 |     |       |
| APOBEC2  | Weak+  | 10930  | NM_006789 | M-019944-00 |     |       |
| APTX     | Weak+  | 54840  | NM_175069 | M-013368-00 |     | APTX  |

|             |       |        |           |             |     |  |
|-------------|-------|--------|-----------|-------------|-----|--|
| ARHGAP5     | Weak+ | 394    | NM_001173 | M-009580-00 |     |  |
| ARHGEF10    | Weak+ | 9639   | NM_014629 | M-013460-00 |     |  |
| AUP1        | Weak+ | 550    | NM_012103 | M-012410-00 |     |  |
| AZU1        | Weak+ | 566    | NM_001700 | M-008914-00 |     |  |
| B3GALT1     | Weak+ | 8708   | NM_020981 | M-013691-00 |     |  |
| B3GNT3      | Weak+ | 10331  | NM_014256 | M-009034-01 |     |  |
| B4GALT1     | Weak+ | 2683   | NM_001497 | M-012965-00 |     |  |
| BANF1       | Weak+ | 8815   | NM_003860 | M-011536-00 |     |  |
| BASE        | Weak+ | 317716 | NM_173859 | M-010740-00 |     |  |
| BFSP2       | Weak+ | 8419   | NM_003571 | M-011471-00 |     |  |
| BIRC1       | Weak+ | 4671   | NM_004536 | M-004389-01 |     |  |
| C10ORF33    | Weak+ | 84795  | NM_032709 | M-010185-00 |     |  |
| C10ORF57    | Weak+ | 80195  | NM_025125 | M-018946-00 |     |  |
| C14ORF147   | Weak+ | 171546 | NM_138288 | M-017156-00 |     |  |
| C14ORF149   | Weak+ | 112849 | NM_144581 | M-010373-00 |     |  |
| C14ORF160   | Weak+ | 79944  | NM_024884 | M-008130-00 |     |  |
| C14ORF48    | Weak+ | 256369 | NM_152777 | M-016258-00 |     |  |
| C19ORF2     | Weak+ | 8725   | NM_003796 | M-017399-00 |     |  |
| C1ORF21     | Weak+ | 81563  | NM_030806 | M-010941-00 |     |  |
| C1S         | Weak+ | 716    | NM_001734 | M-005796-01 |     |  |
| C20ORF53    | Weak+ | 140826 | NM_178472 | M-018137-00 |     |  |
| C21ORF130   | Weak+ | 284835 | XM_379011 | M-031382-00 |     |  |
| C22ORF19    | Weak+ | 8563   | NM_003678 | M-015317-00 | YES |  |
| C6ORF214    | Weak+ | 401247 | NM_207496 | M-032203-00 |     |  |
| CA11        | Weak+ | 770    | NM_001217 | M-009336-00 |     |  |
| CALR3       | Weak+ | 125972 | NM_145046 | M-016230-00 |     |  |
| CASP3       | Weak+ | 836    | NM_004346 | M-004307-01 |     |  |
| CCL26       | Weak+ | 10344  | NM_006072 | M-007838-00 |     |  |
| CCM1        | Weak+ | 889    | NM_004912 | M-003825-01 |     |  |
| CDC26       | Weak+ | 246184 | NM_139286 | M-017290-00 | YES |  |
| CDK5        | Weak+ | 1020   | NM_004935 | M-003239-01 |     |  |
| CHD6        | Weak+ | 84181  | NM_032221 | M-017349-00 |     |  |
| CKIP-1      | Weak+ | 51177  | NM_016274 | M-016800-00 |     |  |
| CLIC2       | Weak+ | 1193   | NM_001289 | M-012982-00 |     |  |
| CLTB        | Weak+ | 1212   | NM_001834 | M-004003-00 |     |  |
| COX6A2      | Weak+ | 1339   | NM_005205 | M-012021-00 |     |  |
| CPSF2       | Weak+ | 53981  | NM_017437 | M-013404-00 |     |  |
| CRY2        | Weak+ | 1408   | NM_021117 | M-014151-00 |     |  |
| CSN3        | Weak+ | 1448   | NM_005212 | M-019940-00 |     |  |
| CTTNBP2     | Weak+ | 83992  | NM_033427 | M-015103-00 |     |  |
| CWF19L1     | Weak+ | 55280  | NM_018294 | M-016322-00 |     |  |
| CYP2C9      | Weak+ | 1559   | NM_000771 | M-008285-00 |     |  |
| DAZL        | Weak+ | 1618   | NM_001351 | M-011249-00 |     |  |
| DEDD        | Weak+ | 9191   | NM_004216 | M-004421-00 |     |  |
| DHDDS       | Weak+ | 79947  | NM_024887 | M-010399-00 |     |  |
| DKFZP313N06 | Weak+ | 285343 | NM_173826 | M-018121-00 |     |  |
| DKFZP434E14 | Weak+ | 284498 | XM_209234 | M-021566-00 |     |  |
| DKFZP564D17 | Weak+ | 83989  | NM_032042 | M-016828-00 |     |  |
| DKFZP564I19 | Weak+ | 25878  | NM_015419 | M-013988-00 |     |  |
| DSPG3       | Weak+ | 1833   | NM_004950 | M-011997-00 |     |  |
| E2F2        | Weak+ | 1870   | NM_004091 | M-003260-02 |     |  |
| EAP30       | Weak+ | 11267  | NM_007241 | M-004695-00 |     |  |
| ELAVL1      | Weak+ | 1994   | NM_001419 | M-003773-01 |     |  |



|           |       |        |             |             |     |       |
|-----------|-------|--------|-------------|-------------|-----|-------|
| ELSPBP1   | Weak+ | 64100  | NM_022142   | M-013046-00 |     |       |
| EMR4      | Weak+ | 326342 | XM_377506   | M-031217-00 |     |       |
| EPHA1     | Weak+ | 2041   | NM_005232   | M-003115-02 |     |       |
| FAM21C    | Weak+ | 253725 | XM_350780   | M-029678-00 |     |       |
| FANCE     | Weak+ | 2178   | NM_021922   | M-013991-00 |     | FANCE |
| FBXL12    | Weak+ | 54850  | NM_017703   | M-005204-01 |     |       |
| FERD3L    | Weak+ | 222894 | NM_152898   | M-008437-00 |     |       |
| FLJ14503  | Weak+ | 256714 | NM_152780   | M-016260-00 |     |       |
| FLJ14959  | Weak+ | 284391 | XM_371139   | M-031230-00 |     |       |
| FLJ16478  | Weak+ | 440695 | NM_00100434 | M-032398-00 |     |       |
| FLJ20534  | Weak+ | 54969  | NM_017867   | M-020849-00 |     |       |
| FLJ20716  | Weak+ | 55026  | NM_017938   | M-018099-00 |     |       |
| FLJ22729  | Weak+ | 79736  | NM_024683   | M-014410-00 |     |       |
| FLJ23518  | Weak+ | 79780  | NM_024725   | M-015438-00 | YES |       |
| FLJ25222  | Weak+ | 374666 | NM_199163   | M-032015-00 |     |       |
| FLJ25955  | Weak+ | 164781 | NM_178821   | M-017857-00 |     |       |
| FLJ30435  | Weak+ | 387628 | XM_376845   | M-031885-00 |     |       |
| FLJ32356  | Weak+ | 144717 | NM_144671   | M-015976-00 |     |       |
| FLJ33860  | Weak+ | 284756 | NM_173644   | M-018187-00 |     |       |
| FLJ33977  | Weak+ | 285605 | NM_173666   | M-018032-00 |     |       |
| FLJ34969  | Weak+ | 201627 | NM_152678   | M-016505-00 |     |       |
| FLJ35036  | Weak+ | 253461 | XM_172341   | M-023605-00 |     |       |
| FLJ35487  | Weak+ | 284505 | NM_173820   | M-018167-00 |     |       |
| FLJ36032  | Weak+ | 284485 | XM_371311   | M-021716-00 |     |       |
| FLJ37440  | Weak+ | 129804 | NM_153214   | M-016726-00 |     |       |
| FLJ37451  | Weak+ | 284161 | NM_182569   | M-018992-00 |     |       |
| FLJ38281  | Weak+ | 163051 | NM_152601   | M-016641-00 |     |       |
| FLJ40321  | Weak+ | 284355 | NM_198479   | M-027234-00 |     |       |
| FLJ42220  | Weak+ | 400207 | NM_207441   | M-032121-00 |     |       |
| FLJ43826  | Weak+ | 342666 | NM_198502   | M-027247-00 |     |       |
| FLJ44955  | Weak+ | 401278 | NM_207500   | M-032184-00 |     |       |
| FLJ45645  | Weak+ | 375287 | NM_198557   | M-027267-00 |     |       |
| FLJ46082  | Weak+ | 389799 | NM_207417   | M-032095-00 |     |       |
| FLJ46111  | Weak+ | 283102 | NM_198473   | M-027228-00 |     |       |
| FLJ90805  | Weak+ | 284339 | NM_173633   | M-018209-00 |     |       |
| G6PC      | Weak+ | 2538   | NM_000151   | M-011037-00 |     |       |
| GALNT9    | Weak+ | 50614  | NM_021808   | M-013069-00 |     |       |
| GDF2      | Weak+ | 2658   | NM_016204   | M-013233-00 |     |       |
| GMPR      | Weak+ | 2766   | NM_006877   | M-008258-01 |     |       |
| GNA14     | Weak+ | 9630   | NM_004297   | M-008561-00 |     |       |
| GNAT3     | Weak+ | 346562 | XM_294370   | M-028947-00 |     |       |
| GP6       | Weak+ | 51206  | NM_016363   | M-021356-00 |     |       |
| GPR155    | Weak+ | 151556 | NM_152529   | M-005494-00 |     |       |
| GPR20     | Weak+ | 2843   | NM_005293   | M-005555-01 |     |       |
| GREM1     | Weak+ | 26585  | NM_013372   | M-021492-00 |     |       |
| GRINA     | Weak+ | 2907   | XM_291268   | M-010697-01 |     |       |
| GRIP1     | Weak+ | 23426  | XM_290559   | M-026981-00 |     |       |
| GUCA1A    | Weak+ | 2978   | NM_000409   | M-019288-00 |     |       |
| GUCA1C    | Weak+ | 9626   | NM_005459   | M-019952-00 |     |       |
| H2AFB     | Weak+ | 83740  | XM_373381   | M-024979-00 |     |       |
| HEPH      | Weak+ | 9843   | NM_014799   | M-009498-00 |     |       |
| HIP-55    | Weak+ | 28988  | NM_014063   | M-016867-00 |     |       |
| HIST1H2AM | Weak+ | 8336   | NM_003514   | M-011436-00 |     |       |

|           |       |        |           |             |     |  |
|-----------|-------|--------|-----------|-------------|-----|--|
| HIST1H4L  | Weak+ | 8368   | NM_003546 | M-011465-00 |     |  |
| HKR2      | Weak+ | 342945 | NM_181846 | M-007175-00 | YES |  |
| HMGCS2    | Weak+ | 3158   | NM_005518 | M-010179-00 |     |  |
| HMGN2     | Weak+ | 3151   | NM_005517 | M-012710-00 |     |  |
| HMGN3     | Weak+ | 9324   | NM_004242 | M-011932-00 |     |  |
| HOXC11    | Weak+ | 3227   | NM_014212 | M-017602-00 |     |  |
| HPS3      | Weak+ | 84343  | NM_032383 | M-017309-00 |     |  |
| HSPC135   | Weak+ | 29083  | NM_014170 | M-020699-00 |     |  |
| IL1A      | Weak+ | 3552   | NM_000575 | M-007952-01 |     |  |
| IL9       | Weak+ | 3578   | NM_000590 | M-007997-01 |     |  |
| IMPA2     | Weak+ | 3613   | NM_014214 | M-008348-00 |     |  |
| INMT      | Weak+ | 11185  | NM_006774 | M-015314-00 |     |  |
| INPP5F    | Weak+ | 22876  | NM_014937 | M-020409-00 |     |  |
| JARID1D   | Weak+ | 8284   | NM_004653 | M-010820-00 |     |  |
| KA35      | Weak+ | 390792 | NM_213656 | M-032554-00 |     |  |
| KBTBD5    | Weak+ | 131377 | NM_152393 | M-016211-00 |     |  |
| KCNH7     | Weak+ | 90134  | NM_033272 | M-006237-01 |     |  |
| KCNV1     | Weak+ | 27012  | NM_014379 | M-006278-01 |     |  |
| KIAA0117  | Weak+ | 23029  | NM_015014 | M-022399-00 | YES |  |
| KIAA0495  | Weak+ | 57212  | NM_207306 | M-027524-00 |     |  |
| KIAA0523  | Weak+ | 23302  | XM_041964 | M-023005-00 |     |  |
| KIAA0676  | Weak+ | 23061  | NM_015043 | M-031872-00 |     |  |
| KIAA0795  | Weak+ | 23276  | NM_025010 | M-014549-00 |     |  |
| KIAA0825  | Weak+ | 23004  | XM_371761 | M-028430-00 |     |  |
| KIAA0931  | Weak+ | 23035  | XM_041191 | M-022586-00 |     |  |
| KIAA1068  | Weak+ | 23386  | NM_015332 | M-014018-00 | YES |  |
| KIAA1239  | Weak+ | 57495  | XM_049078 | M-023887-00 |     |  |
| KIAA1446  | Weak+ | 57596  | NM_020836 | M-014095-00 | YES |  |
| KIAA2010  | Weak+ | 55671  | NM_032560 | M-019093-00 |     |  |
| KLHDC5    | Weak+ | 57542  | NM_020782 | M-027054-00 | YES |  |
| KLHL10    | Weak+ | 317719 | NM_152467 | M-015577-00 |     |  |
| KRT20     | Weak+ | 54474  | NM_019010 | M-013390-00 |     |  |
| KRT24     | Weak+ | 192666 | NM_019016 | M-021177-00 |     |  |
| KRT25B    | Weak+ | 353288 | NM_181539 | M-018748-00 |     |  |
| KRT25C    | Weak+ | 342574 | NM_181537 | M-018754-00 |     |  |
| LMNA      | Weak+ | 4000   | NM_170707 | M-004978-00 |     |  |
| LOC128710 | Weak+ | 128710 | XM_059267 | M-024240-00 |     |  |
| LOC134492 | Weak+ | 134492 | NM_145266 | M-016043-00 |     |  |
| LOC144776 | Weak+ | 144776 | XM_375033 | M-030181-00 |     |  |
| LOC152015 | Weak+ | 152015 | XM_042178 | M-023589-00 |     |  |
| LOC152742 | Weak+ | 152742 | XM_379260 | M-028346-00 |     |  |
| LOC167127 | Weak+ | 167127 | NM_174914 | M-017807-00 |     |  |
| LOC219612 | Weak+ | DC     | XM_168585 | M-025428-00 |     |  |
| LOC253017 | Weak+ | 253017 | XM_171068 | M-024084-00 |     |  |
| LOC253289 | Weak+ | DC     | XM_171165 | M-025271-00 |     |  |
| LOC283116 | Weak+ | 283116 | XM_208043 | M-026798-00 |     |  |
| LOC283214 | Weak+ | 283214 | XM_378303 | M-029918-00 |     |  |
| LOC283219 | Weak+ | 283219 | XM_374915 | M-026714-00 |     |  |
| LOC284240 | Weak+ | 284240 | XM_378763 | M-031033-00 |     |  |
| LOC284390 | Weak+ | 284390 | XM_371138 | M-031229-00 |     |  |
| LOC284397 | Weak+ | DC     | XM_209180 | M-026191-00 |     |  |
| LOC284749 | Weak+ | 284749 | XM_378983 | M-031307-00 |     |  |
| LOC285045 | Weak+ | 285045 | XM_379086 | M-027824-00 |     |  |

|           |       |        |           |             |  |  |
|-----------|-------|--------|-----------|-------------|--|--|
| LOC285248 | Weak+ | DC     | XM_211816 | M-023664-00 |  |  |
| LOC285335 | Weak+ | 285335 | XM_210562 | M-023575-00 |  |  |
| LOC286087 | Weak+ | 286087 | AK091675  | M-032283-00 |  |  |
| LOC286157 | Weak+ | 286157 | XM_209920 | M-025973-00 |  |  |
| LOC286235 | Weak+ | 286235 | XM_212238 | M-026010-00 |  |  |
| LOC286442 | Weak+ | 286442 | XM_379700 | M-031665-00 |  |  |
| LOC338751 | Weak+ | 338751 | XM_291977 | M-026845-00 |  |  |
| LOC339321 | Weak+ | 339321 | XM_290831 | M-023650-00 |  |  |
| LOC339448 | Weak+ | 339448 | NM_207356 | M-021859-00 |  |  |
| LOC339451 | Weak+ | 339451 | NM_198317 | M-031770-00 |  |  |
| LOC339476 | Weak+ | 339476 | XM_378923 | M-027548-00 |  |  |
| LOC339788 | Weak+ | 339788 | XM_379074 | M-027975-00 |  |  |
| LOC339896 | Weak+ | 339896 | NM_207359 | M-023510-00 |  |  |
| LOC340109 | Weak+ | 340109 | XM_379322 | M-028502-00 |  |  |
| LOC341371 | Weak+ | DC     | XM_292029 | M-027052-00 |  |  |
| LOC343705 | Weak+ | DC     | XM_293157 | M-024297-00 |  |  |
| LOC344709 | Weak+ | 344709 | XM_298233 | M-023276-00 |  |  |
| LOC345462 | Weak+ | 345462 | XM_293828 | M-024604-00 |  |  |
| LOC374395 | Weak+ | 374395 | NM_199337 | M-032107-00 |  |  |
| LOC375759 | Weak+ | 375759 | NM_199350 | M-032130-00 |  |  |
| LOC387601 | Weak+ | 387601 | NM_199352 | M-031740-00 |  |  |
| LOC387638 | Weak+ | 387638 | XM_373449 | M-029768-00 |  |  |
| LOC387643 | Weak+ | DC     | XM_370537 | M-029773-00 |  |  |
| LOC387702 | Weak+ | DC     | XM_370570 | M-029644-00 |  |  |
| LOC387723 | Weak+ | 387723 | XM_370586 | M-029797-00 |  |  |
| LOC387816 | Weak+ | DC     | XM_370664 | M-029818-00 |  |  |
| LOC387845 | Weak+ | 387845 | XM_370684 | M-030125-00 |  |  |
| LOC387883 | Weak+ | DC     | XM_373545 | M-030167-00 |  |  |
| LOC387921 | Weak+ | 387921 | XM_370722 | M-030217-00 |  |  |
| LOC387933 | Weak+ | 387933 | XM_370728 | M-030233-00 |  |  |
| LOC387983 | Weak+ | DC     | XM_373588 | M-030282-00 |  |  |
| LOC388077 | Weak+ | 388077 | XM_370834 | M-030547-00 |  |  |
| LOC388117 | Weak+ | 123745 | XM_373627 | M-030395-00 |  |  |
| LOC388167 | Weak+ | DC     | XM_370899 | M-030481-00 |  |  |
| LOC388271 | Weak+ | 388271 | XM_370980 | M-030764-00 |  |  |
| LOC388278 | Weak+ | DC     | XM_373687 | M-030625-00 |  |  |
| LOC388403 | Weak+ | 388403 | XM_371070 | M-030916-00 |  |  |
| LOC388440 | Weak+ | 9560   | XM_371092 | M-030992-00 |  |  |
| LOC388491 | Weak+ | DC     | XM_371125 | M-031203-00 |  |  |
| LOC388561 | Weak+ | 388561 | XM_371192 | M-031148-00 |  |  |
| LOC388605 | Weak+ | 388605 | XM_371230 | M-027586-00 |  |  |
| LOC388650 | Weak+ | 388650 | XM_371269 | M-027412-00 |  |  |
| LOC388774 | Weak+ | 55061  | XM_371374 | M-027700-00 |  |  |
| LOC388969 | Weak+ | 388969 | XM_371506 | M-027866-00 |  |  |
| LOC389031 | Weak+ | 389031 | XM_371555 | M-027951-00 |  |  |
| LOC389107 | Weak+ | DC     | XM_371626 | M-028093-00 |  |  |
| LOC389188 | Weak+ | DC     | XM_374070 | M-028129-00 |  |  |
| LOC389276 | Weak+ | DC     | XM_371728 | M-028500-00 |  |  |
| LOC389288 | Weak+ | DC     | XM_374120 | M-028517-00 |  |  |
| LOC389290 | Weak+ | DC     | XM_374121 | M-028490-00 |  |  |
| LOC389362 | Weak+ | 389362 | XM_374159 | M-028632-00 |  |  |
| LOC389457 | Weak+ | 389457 | XM_374200 | M-028798-00 |  |  |
| LOC389530 | Weak+ | DC     | XM_291247 | M-028903-00 |  |  |

|           |       |        |           |             |     |  |
|-----------|-------|--------|-----------|-------------|-----|--|
| LOC389602 | Weak+ | DC     | XM_372004 | M-028752-00 |     |  |
| LOC389642 | Weak+ | DC     | XM_374261 | M-029231-00 |     |  |
| LOC389676 | Weak+ | 389676 | XM_374276 | M-029343-00 |     |  |
| LOC389950 | Weak+ | DC     | XM_372307 | M-029790-00 |     |  |
| LOC390213 | Weak+ | 390213 | XM_372418 | M-029906-00 |     |  |
| LOC390466 | Weak+ | DC     | XM_372521 | M-030360-00 |     |  |
| LOC390877 | Weak+ | 390877 | XM_372705 | M-031216-00 |     |  |
| LOC391001 | Weak+ | 391001 | XM_372761 | M-027644-00 |     |  |
| LOC391656 | Weak+ | 391656 | XM_373027 | M-028288-00 |     |  |
| LOC391707 | Weak+ | 391707 | XM_373036 | M-028279-00 |     |  |
| LOC392152 | Weak+ | DC     | XM_373219 | M-028889-00 |     |  |
| LOC392164 | Weak+ | DC     | XM_373224 | M-028795-00 |     |  |
| LOC392347 | Weak+ | DC     | XM_373298 | M-029432-00 |     |  |
| LOC392563 | Weak+ | 392563 | XM_373382 | M-031654-00 |     |  |
| LOC392583 | Weak+ | DC     | XM_374379 | M-031678-00 |     |  |
| LOC392621 | Weak+ | 389457 | XM_374711 | M-028971-00 |     |  |
| LOC392726 | Weak+ | DC     | XM_374734 | M-029100-00 |     |  |
| LOC399707 | Weak+ | DC     | XM_378202 | M-029701-00 |     |  |
| LOC399786 | Weak+ | DC     | XM_378236 | M-029755-00 |     |  |
| LOC400123 | Weak+ | 400123 | XM_378411 | M-030218-00 |     |  |
| LOC400586 | Weak+ | DC     | XM_375424 | M-030973-00 |     |  |
| LOC400643 | Weak+ | 400643 | XM_378738 | M-031017-00 |     |  |
| LOC400682 | Weak+ | 400682 | XM_375590 | M-031261-00 |     |  |
| LOC400842 | Weak+ | DC     | XM_375914 | M-031352-00 |     |  |
| LOC400992 | Weak+ | DC     | XM_379118 | M-027796-00 |     |  |
| LOC401095 | Weak+ | 401095 | XM_376278 | M-028187-00 |     |  |
| LOC401155 | Weak+ | DC     | XM_379276 | M-028251-00 |     |  |
| LOC401215 | Weak+ | DC     | XM_379368 | M-028447-00 |     |  |
| LOC401234 | Weak+ | DC     | XM_379395 | M-028675-00 |     |  |
| LOC401242 | Weak+ | 401242 | XM_379402 | M-028688-00 |     |  |
| LOC401286 | Weak+ | 401286 | XM_376555 | M-028648-00 |     |  |
| LOC401442 | Weak+ | 401442 | XM_379543 | M-029257-00 |     |  |
| LOC401471 | Weak+ | 401471 | XM_379595 | M-029346-00 |     |  |
| LOC401477 | Weak+ | DC     | XM_379605 | M-029360-00 |     |  |
| LOC401551 | Weak+ | 401551 | XM_376909 | M-029592-00 |     |  |
| LOC402469 | Weak+ | 402469 | XM_379797 | M-028996-00 |     |  |
| LOC402682 | Weak+ | 402682 | XM_380026 | M-031835-00 |     |  |
| LOC51234  | Weak+ | 51234  | NM_016454 | M-021126-00 |     |  |
| LOC56920  | Weak+ | 56920  | NM_020163 | M-020454-00 |     |  |
| LOC57019  | Weak+ | 57019  | NM_020313 | M-020666-00 |     |  |
| LOC90113  | Weak+ | 90113  | XM_291077 | M-023782-00 |     |  |
| LRG47     | Weak+ | 345611 | XM_293893 | M-028450-00 |     |  |
| LRRK1     | Weak+ | 79705  | NM_024652 | M-005320-01 |     |  |
| LSECTIN   | Weak+ | 339390 | NM_198492 | M-032216-00 |     |  |
| MADP-1    | Weak+ | 85437  | NM_033114 | M-016700-00 |     |  |
| MAN1      | Weak+ | 23592  | NM_014319 | M-006306-00 |     |  |
| MGC11332  | Weak+ | 84804  | NM_032718 | M-007357-00 |     |  |
| MGC12965  | Weak+ | 374408 | NM_198519 | M-031766-00 |     |  |
| MGC14798  | Weak+ | 89978  | NM_080650 | M-031880-00 |     |  |
| MGC26710  | Weak+ | 150280 | NM_152510 | M-016850-00 |     |  |
| MGC42638  | Weak+ | 340561 | NM_178567 | M-009099-00 |     |  |
| MLLT4     | Weak+ | 4301   | NM_005936 | M-020075-00 | YES |  |
| MMP27     | Weak+ | 64066  | NM_022122 | M-005966-00 |     |  |

|          |       |        |             |             |     |        |
|----------|-------|--------|-------------|-------------|-----|--------|
| MX2      | Weak+ | 4600   | NM_002463   | M-011736-00 |     |        |
| MYH8     | Weak+ | 4626   | NM_002472   | M-012646-00 |     |        |
| N2N      | Weak+ | 388677 | NM_203458   | M-032019-00 |     |        |
| NCB5OR   | Weak+ | 51167  | NM_016230   | M-009347-00 |     |        |
| NLGN4Y   | Weak+ | 22829  | NM_014893   | M-008441-00 |     |        |
| NME5     | Weak+ | 8382   | NM_003551   | M-006754-00 |     |        |
| NR6A1    | Weak+ | 2649   | NM_001489   | M-003431-01 |     |        |
| NTSR2    | Weak+ | 23620  | NM_012344   | M-005676-00 |     |        |
| NYD-TSP1 | Weak+ | 84654  | NM_032567   | M-015845-00 |     |        |
| OCLM     | Weak+ | 10896  | NM_022375   | M-027310-00 |     |        |
| OR11A1   | Weak+ | 26531  | NM_013937   | M-008813-00 |     |        |
| OR11G2   | Weak+ | 390439 | NM_00100550 | M-032483-00 |     |        |
| OR2T11   | Weak+ | 127077 | NM_00100196 | M-032345-00 |     |        |
| OR4P4    | Weak+ | 81300  | NM_00100412 | M-032377-00 |     |        |
| OR6N2    | Weak+ | 81442  | NM_00100527 | M-032438-00 |     |        |
| PAFAH1B2 | Weak+ | 5049   | NM_002572   | M-008797-00 |     |        |
| PCDHGB3  | Weak+ | 56102  | NM_018924   | M-013290-00 |     |        |
| PDE4A    | Weak+ | 5141   | NM_006202   | M-007647-00 |     |        |
| PDZK6    | Weak+ | 27152  | NM_015693   | M-031873-00 |     |        |
| PICALM   | Weak+ | 8301   | NM_007166   | M-004004-02 |     |        |
| PIK3C3   | Weak+ | 5289   | NM_002647   | M-005250-00 |     |        |
| PITPNM1  | Weak+ | 9600   | NM_004910   | M-019888-00 |     |        |
| PMP22    | Weak+ | 5376   | NM_000304   | M-010616-00 |     |        |
| POTE15   | Weak+ | 339010 | NM_207355   | M-032043-00 |     |        |
| PREP     | Weak+ | 5550   | NM_002726   | M-006006-01 |     |        |
| PTBP2    | Weak+ | 58155  | NM_021190   | M-021323-00 |     |        |
| PTCH     | Weak+ | 5727   | NM_000264   | M-003924-00 |     |        |
| PTPLA    | Weak+ | 9200   | NM_014241   | M-008742-00 |     |        |
| PTPN21   | Weak+ | 11099  | NM_007039   | M-009379-01 |     |        |
| PTPRK    | Weak+ | 5796   | NM_002844   | M-004204-01 |     |        |
| RAB22A   | Weak+ | 57403  | NM_020673   | M-019214-00 |     |        |
| RAB5A    | Weak+ | 5868   | NM_004162   | M-004009-00 |     |        |
| RAC4     | Weak+ | 286472 | XM_210062   | M-031617-00 |     |        |
| RAD17    | Weak+ | 5884   | NM_002873   | M-003294-01 |     | RAD17  |
| RARRES3  | Weak+ | 5920   | NM_004585   | M-011889-01 |     |        |
| RBM23    | Weak+ | 55147  | NM_018107   | M-016689-00 |     |        |
| REG4     | Weak+ | 83998  | NM_032044   | M-013538-00 |     |        |
| REL      | Weak+ | 5966   | NM_002908   | M-004768-00 |     |        |
| RERE     | Weak+ | 473    | NM_012102   | M-008367-00 |     |        |
| RFXAP    | Weak+ | 5994   | NM_000538   | M-011104-00 |     |        |
| RHPN1    | Weak+ | 114822 | NM_052924   | M-015163-00 |     |        |
| RLN1     | Weak+ | 6013   | NM_006911   | M-017403-00 |     |        |
| RNF125   | Weak+ | 54941  | NM_017831   | M-007005-00 |     |        |
| ROCK2    | Weak+ | 9475   | NM_004850   | M-004610-01 | YES |        |
| ROD1     | Weak+ | 9991   | NM_005156   | M-019452-00 |     |        |
| RUVBL1   | Weak+ | 8607   | NM_003707   | M-008977-00 |     | RUVBL1 |
| S100A5   | Weak+ | 6276   | NM_002962   | M-011768-00 |     |        |
| SAA4     | Weak+ | 6291   | NM_006512   | M-012747-00 |     |        |
| SCGB1D2  | Weak+ | 10647  | NM_006551   | M-012291-00 |     |        |
| SCML4    | Weak+ | 256380 | NM_198081   | M-021430-00 |     |        |
| SCN11A   | Weak+ | 11280  | NM_014139   | M-006296-01 |     |        |
| SCN4A    | Weak+ | 6329   | NM_000334   | M-006300-01 |     |        |
| SERPINB2 | Weak+ | 5055   | NM_002575   | M-010859-00 |     |        |

|          |       |        |           |             |     |         |
|----------|-------|--------|-----------|-------------|-----|---------|
| SH3MD4   | Weak+ | 344558 | XM_293090 | M-027806-00 |     |         |
| SH3YL1   | Weak+ | 26751  | NM_015677 | M-020542-00 |     |         |
| SIAT7C   | Weak+ | 256435 | NM_152996 | M-015456-00 |     |         |
| SIX4     | Weak+ | 51804  | NM_017420 | M-020267-00 | YES |         |
| SLC17A5  | Weak+ | 26503  | NM_012434 | M-007415-00 |     |         |
| SLC22A1  | Weak+ | 6580   | NM_003057 | M-007443-00 |     |         |
| SLC2A9   | Weak+ | 56606  | NM_020041 | M-007521-00 |     |         |
| SLC35D1  | Weak+ | 23169  | NM_015139 | M-007546-00 |     |         |
| SLC6A19  | Weak+ | 340024 | XM_291120 | M-007352-00 |     |         |
| SLC6A3   | Weak+ | 6531   | NM_001044 | M-007603-01 |     |         |
| SMA4     | Weak+ | 11039  | NM_021652 | M-027285-00 |     |         |
| SMARCAD1 | Weak+ | 56916  | NM_020159 | M-013801-00 | YES |         |
| SMARCD2  | Weak+ | 6603   | NM_003077 | M-011393-00 |     | SMARCD2 |
| SMO      | Weak+ | 6608   | NM_005631 | M-005726-00 |     |         |
| SMPD3    | Weak+ | 55512  | NM_018667 | M-006678-00 |     |         |
| SNAPC3   | Weak+ | 6619   | NM_003084 | M-012601-00 | YES |         |
| SNX4     | Weak+ | 8723   | NM_003794 | M-011520-00 |     |         |
| SPATA1   | Weak+ | 64173  | NM_022354 | M-014045-00 |     |         |
| SPRY1    | Weak+ | 10252  | NM_005841 | M-027339-00 |     |         |
| SPRY2    | Weak+ | 10253  | NM_005842 | M-005206-01 |     |         |
| SYT14L   | Weak+ | 83851  | NM_031914 | M-014750-00 |     |         |
| TAC1     | Weak+ | 6863   | NM_003182 | M-011788-00 |     |         |
| TANK     | Weak+ | 10010  | NM_004180 | M-005255-00 |     |         |
| TBPL1    | Weak+ | 9519   | NM_004865 | M-017254-00 |     |         |
| TCTA     | Weak+ | 6988   | NM_022171 | M-019640-00 |     |         |
| THBS1    | Weak+ | 7057   | NM_003246 | M-019743-00 |     |         |
| TLR9     | Weak+ | 54106  | NM_017442 | M-004066-01 |     |         |
| TM4SF8   | Weak+ | 10099  | NM_005724 | M-010735-00 |     |         |
| TOMM34   | Weak+ | 10953  | NM_006809 | M-016439-00 |     |         |
| TOP3A    | Weak+ | 7156   | NM_004618 | M-005279-00 |     | TOP3A   |
| TRA1     | Weak+ | 7184   | NM_003299 | M-006417-01 |     |         |
| TRAM1L1  | Weak+ | 133022 | NM_152402 | M-016877-00 |     |         |
| TRAPPC1  | Weak+ | 58485  | NM_021210 | M-013781-00 |     |         |
| TRIM50B  | Weak+ | 375593 | NM_198924 | M-028896-00 |     |         |
| TTC16    | Weak+ | 158248 | NM_144965 | M-017031-00 |     |         |
| U2AF1L1  | Weak+ | 7310   | NM_005083 | M-006595-00 |     |         |
| UBE2D1   | Weak+ | 7321   | NM_003338 | M-009387-01 |     |         |
| UBQLN3   | Weak+ | 50613  | NM_017481 | M-013398-00 |     |         |
| UGT1A6   | Weak+ | 54578  | NM_001072 | M-020196-00 |     |         |
| UNQ6369  | Weak+ | 347365 | NM_198510 | M-027250-00 |     |         |
| UPP2     | Weak+ | 151531 | NM_173355 | M-006646-00 |     |         |
| USP31    | Weak+ | 57478  | NM_020718 | M-022513-00 |     |         |
| VN1R1    | Weak+ | 57191  | NM_020633 | M-013177-00 |     |         |
| XPO5     | Weak+ | 57510  | NM_020750 | M-014000-00 |     |         |
| ZCWCC3   | Weak+ | 23515  | NM_015358 | M-012976-00 |     |         |
| ZNF11B   | Weak+ | 7558   | NM_006955 | M-012772-00 |     |         |
| ZNF585A  | Weak+ | 199704 | NM_152655 | M-016432-00 |     |         |
| ZNF616   | Weak+ | 90317  | XM_030892 | M-023805-00 |     |         |
| AADAT    | Weak  | 51166  | NM_016228 | M-013159-00 |     |         |
| AB026190 | Weak  | 27252  | NM_014458 | M-004893-00 |     |         |
| ABCB6    | Weak  | 10058  | NM_005689 | M-007304-00 |     |         |
| ABCB9    | Weak  | 23457  | NM_019624 | M-007307-00 |     |         |
| ABCC9    | Weak  | 10060  | NM_005691 | M-007316-00 |     |         |

|           |      |        |           |             |     |          |
|-----------|------|--------|-----------|-------------|-----|----------|
| ABHD3     | Weak | 171586 | NM_138340 | M-008587-00 |     |          |
| ACP6      | Weak | 51205  | NM_016361 | M-008665-00 |     |          |
| ACY1L2    | Weak | 135293 | XM_072402 | M-024889-00 |     |          |
| ADAM22    | Weak | 53616  | NM_004194 | M-009246-01 |     |          |
| ADAMTS1   | Weak | 9510   | NM_006988 | M-005761-01 |     |          |
| ADAMTS17  | Weak | 170691 | NM_139057 | M-005768-01 |     |          |
| ADAMTS19  | Weak | 171019 | NM_133638 | M-005770-01 |     |          |
| ADAR      | Weak | 103    | NM_001111 | M-008630-00 |     |          |
| ADFP      | Weak | 123    | NM_001122 | M-019204-00 |     |          |
| AF5Q31    | Weak | 27125  | NM_014423 | M-020276-00 | YES |          |
| AHSA2     | Weak | 130872 | NM_152392 | M-008942-00 |     |          |
| ALDH3A2   | Weak | 224    | NM_000382 | M-009386-01 |     |          |
| ALG6      | Weak | 29929  | NM_013339 | M-013662-00 |     |          |
| ALG8      | Weak | 79053  | NM_024079 | M-027136-00 |     |          |
| ALS2CR15  | Weak | 130026 | NM_138468 | M-016849-00 |     |          |
| AMY1A     | Weak | 276    | NM_004038 | M-012691-00 |     |          |
| ANKH      | Weak | 56172  | NM_054027 | M-012898-00 |     |          |
| ANKRD13   | Weak | 88455  | NM_033121 | M-027120-00 |     |          |
| ANP32A    | Weak | 8125   | NM_006305 | M-016060-00 |     |          |
| ANXA4     | Weak | 307    | NM_001153 | M-010742-01 |     |          |
| AP2A1     | Weak | 160    | NM_014203 | M-012492-00 |     |          |
| AQP6      | Weak | 363    | NM_001652 | M-011579-00 |     |          |
| AQP7      | Weak | 364    | NM_001170 | M-008726-00 |     |          |
| ARR3      | Weak | 407    | NM_004312 | M-019785-00 |     |          |
| ASNS      | Weak | 440    | NM_001673 | M-009377-01 |     |          |
| ATBF1     | Weak | 463    | NM_006885 | M-015412-00 | YES |          |
| ATOH7     | Weak | 220202 | NM_145178 | M-009030-00 |     |          |
| B2M       | Weak | 567    | NM_004048 | M-004366-00 |     |          |
| BCDO2     | Weak | 83875  | NM_031938 | M-014757-00 |     |          |
| BCHE      | Weak | 590    | NM_000055 | M-009826-01 |     |          |
| BCL11A    | Weak | 53335  | NM_018014 | M-006996-00 |     |          |
| BCL2A1    | Weak | 597    | NM_004049 | M-003306-00 |     |          |
| BFSP1     | Weak | 631    | NM_001195 | M-011218-00 |     |          |
| BHLHB3    | Weak | 79365  | NM_030762 | M-010043-00 |     |          |
| BPAG1     | Weak | 667    | NM_001723 | M-011596-00 |     |          |
| BRD9      | Weak | 65980  | NM_023924 | M-014250-00 |     |          |
| BSCL2     | Weak | 26580  | NM_032667 | M-016749-00 |     |          |
| BTBD4     | Weak | 140685 | NM_025224 | M-032520-00 |     |          |
| C10ORF107 | Weak | 219621 | NM_173554 | M-018457-00 |     |          |
| C10ORF86  | Weak | 54780  | NM_017615 | M-020566-00 | YES | C10ORF86 |
| C11ORF30  | Weak | 56946  | NM_020193 | M-004081-00 |     |          |
| C11ORF9   | Weak | 745    | NM_013279 | M-020692-00 |     |          |
| C14ORF101 | Weak | 54916  | NM_017799 | M-020793-00 |     |          |
| C14ORF150 | Weak | 112840 | NM_080666 | M-015254-00 |     |          |
| C14ORF39  | Weak | 317761 | NM_174978 | M-017933-00 |     |          |
| C17ORF37  | Weak | 84299  | NM_032339 | M-014864-00 |     |          |
| C19ORF18  | Weak | 147685 | NM_152474 | M-016200-00 |     |          |
| C19ORF30  | Weak | 284424 | NM_174947 | M-018479-00 |     |          |
| C19ORF4   | Weak | 25789  | NM_012109 | M-012412-00 |     |          |
| C1GALT1   | Weak | 56913  | NM_020156 | M-020490-00 |     |          |
| C1ORF17   | Weak | 23127  | NM_015101 | M-014120-00 |     |          |
| C1ORF29   | Weak | 10964  | NM_006820 | M-004599-00 |     |          |
| C1QDC1    | Weak | 65981  | NM_032156 | M-014793-00 |     |          |

|           |      |        |           |             |     |  |
|-----------|------|--------|-----------|-------------|-----|--|
| C20ORF141 | Weak | 128653 | NM_080739 | M-015265-00 |     |  |
| C20ORF43  | Weak | 51507  | NM_016407 | M-020569-00 |     |  |
| C2ORF23   | Weak | 65055  | NM_022912 | M-014235-00 |     |  |
| C6ORF109  | Weak | 25844  | NM_015388 | M-013995-00 |     |  |
| C6ORF123  | Weak | 26238  | NM_014356 | M-020580-00 |     |  |
| C6ORF152  | Weak | 167691 | NM_181714 | M-018595-00 |     |  |
| C6ORF175  | Weak | 404672 | NM_207118 | M-032021-00 | YES |  |
| C6ORF51   | Weak | 112495 | NM_138408 | M-015508-00 |     |  |
| C9ORF78   | Weak | 51759  | NM_016482 | M-020231-00 |     |  |
| CA1       | Weak | 759    | NM_001738 | M-010173-00 |     |  |
| CABLES2   | Weak | 81928  | NM_031215 | M-032282-00 |     |  |
| CAD       | Weak | 790    | NM_004341 | M-009471-00 |     |  |
| CALCA     | Weak | 796    | NM_001741 | M-021447-00 |     |  |
| CAMK1D    | Weak | 57118  | NM_020397 | M-004946-00 |     |  |
| CAPN12    | Weak | 147968 | NM_144691 | M-005802-00 |     |  |
| CAPN6     | Weak | 827    | NM_014289 | M-009423-00 |     |  |
| CAPS      | Weak | 828    | NM_004058 | M-011823-00 |     |  |
| CASK      | Weak | 8573   | NM_003688 | M-005311-01 |     |  |
| CBLB      | Weak | 868    | NM_170662 | M-003004-01 |     |  |
| CBLN1     | Weak | 869    | NM_004352 | M-011825-00 |     |  |
| CCNI      | Weak | 10983  | NM_006835 | M-003219-02 |     |  |
| CCNT1     | Weak | 904    | NM_001240 | M-003220-02 |     |  |
| CD22      | Weak | 933    | NM_001771 | M-019501-00 |     |  |
| CD44      | Weak | 960    | NM_000610 | M-009999-01 |     |  |
| CDC7      | Weak | 8317   | NM_003503 | M-003234-02 |     |  |
| CDK5R2    | Weak | 8941   | NM_003936 | M-008885-00 |     |  |
| CDYL      | Weak | 9425   | NM_004824 | M-008521-00 |     |  |
| CGI-109   | Weak | 51014  | NM_181836 | M-007855-00 |     |  |
| CGI-119   | Weak | 51643  | NM_016056 | M-020255-00 |     |  |
| CHAT      | Weak | 1103   | NM_020549 | M-009378-01 |     |  |
| CHRNA3    | Weak | 1136   | NM_000743 | M-006137-01 |     |  |
| CIDEB     | Weak | 27141  | NM_014430 | M-004410-01 |     |  |
| CIRBP     | Weak | 1153   | NM_001280 | M-020189-00 |     |  |
| CITED1    | Weak | 4435   | NM_004143 | M-016022-00 |     |  |
| CLCN1     | Weak | 1180   | NM_000083 | M-006149-00 |     |  |
| CLDN1     | Weak | 9076   | NM_021101 | M-017369-00 |     |  |
| CLDN15    | Weak | 24146  | NM_014343 | M-015596-00 |     |  |
| CLDN3     | Weak | 1365   | NM_001306 | M-017303-00 |     |  |
| CLDN8     | Weak | 9073   | NM_199328 | M-017049-00 |     |  |
| CLECSF5   | Weak | 23601  | NM_013252 | M-021371-00 |     |  |
| CLN3      | Weak | 1201   | NM_000086 | M-019282-00 |     |  |
| CLSTN2    | Weak | 64084  | NM_022131 | M-013883-00 |     |  |
| CNGB3     | Weak | 54714  | NM_019098 | M-006161-01 |     |  |
| COL7A1    | Weak | 1294   | NM_000094 | M-011017-00 |     |  |
| COLEC12   | Weak | 81035  | NM_030781 | M-013240-00 |     |  |
| COPS4     | Weak | 51138  | NM_016129 | M-021037-00 |     |  |
| COPS8     | Weak | 10920  | NM_006710 | M-015831-00 |     |  |
| COX7A1    | Weak | 1346   | NM_001864 | M-013152-00 |     |  |
| CPXM      | Weak | 56265  | NM_019609 | M-005829-01 |     |  |
| CPXM2     | Weak | 119587 | NM_198148 | M-005927-00 |     |  |
| CRBN      | Weak | 51185  | NM_016302 | M-021086-00 |     |  |
| CRHBP     | Weak | 1393   | NM_001882 | M-008423-00 |     |  |
| CRTAC1    | Weak | 55118  | NM_018058 | M-009527-00 |     |  |



|             |      |        |           |             |     |       |
|-------------|------|--------|-----------|-------------|-----|-------|
| CRYAB       | Weak | 1410   | NM_001885 | M-009743-00 |     |       |
| CSH1        | Weak | 1442   | NM_001317 | M-011243-00 |     |       |
| CTMP        | Weak | 117145 | NM_053055 | M-008604-00 |     |       |
| CXCL9       | Weak | 4283   | NM_002416 | M-007881-00 |     |       |
| DACH1       | Weak | 1602   | NM_004392 | M-013222-00 |     |       |
| DAZ         | Weak | 1617   | NM_004081 | M-011840-00 |     |       |
| DBC-1       | Weak | 57805  | NM_021174 | M-010427-00 |     |       |
| DC13        | Weak | 56942  | NM_020188 | M-020330-00 |     |       |
| DCTN3       | Weak | 11258  | NM_007234 | M-012365-00 |     |       |
| DDEF2       | Weak | 8853   | NM_003887 | M-011544-00 |     |       |
| DGKG        | Weak | 1608   | NM_001346 | M-006715-00 |     |       |
| DKFZP434C03 | Weak | 54762  | NM_017577 | M-020545-00 |     |       |
| DKFZP434C18 | Weak | 399474 | XM_033704 | M-027563-00 |     |       |
| DKFZP434G05 | Weak | 54758  | NM_017566 | M-017013-00 |     |       |
| DKFZP434I11 | Weak | 25962  | NM_015496 | M-019278-00 |     |       |
| DKFZP434P21 | Weak | 29774  | NM_014549 | M-031949-00 |     |       |
| DKFZP564B16 | Weak | 25874  | NM_015415 | M-020233-00 |     |       |
| DKFZP564C04 | Weak | 345499 | XM_376413 | M-028432-00 |     |       |
| DKFZP566K05 | Weak | 26095  | NM_015605 | M-013909-00 | YES |       |
| DKFZP761C16 | Weak | 65056  | NM_022913 | M-014236-00 |     |       |
| DKFZP762O07 | Weak | 55529  | NM_018710 | M-013808-00 |     |       |
| DLEC1       | Weak | 9940   | NM_005106 | M-011983-00 |     |       |
| DLGAP4      | Weak | 22839  | NM_014902 | M-009452-00 |     |       |
| DLNB14      | Weak | 338657 | NM_198489 | M-027240-00 |     |       |
| DPP3        | Weak | 10072  | NM_005700 | M-005853-00 |     |       |
| DRE1        | Weak | 54800  | NM_017644 | M-020604-00 |     |       |
| DSCR9       | Weak | 257203 | NM_148675 | M-017055-00 |     |       |
| DTNB        | Weak | 1838   | NM_021907 | M-021367-01 |     |       |
| DUSP16      | Weak | 80824  | NM_030640 | M-007890-00 |     |       |
| DUT         | Weak | 1854   | NM_001948 | M-010258-00 |     |       |
| DVL2        | Weak | 1856   | NM_004422 | M-004069-01 |     |       |
| E2F5        | Weak | 1875   | NM_001951 | M-003263-02 |     |       |
| EDN1        | Weak | 1906   | NM_001955 | M-016692-00 |     |       |
| EDNRA       | Weak | 1909   | NM_001957 | M-005485-00 |     |       |
| EDNRB       | Weak | 1910   | NM_000115 | M-003657-01 |     |       |
| EEF1A2      | Weak | 1917   | NM_001958 | M-003882-00 |     |       |
| EGR1        | Weak | 1958   | NM_001964 | M-006526-01 |     |       |
| EHHADH      | Weak | 1962   | NM_001966 | M-009822-00 |     |       |
| EIF4G3      | Weak | 8672   | NM_003760 | M-019530-00 |     |       |
| EMCN        | Weak | 51705  | NM_016242 | M-015860-00 |     |       |
| EMP2        | Weak | 2013   | NM_001424 | M-016226-00 |     |       |
| ENPP3       | Weak | 5169   | NM_005021 | M-004540-00 |     |       |
| EPB41L2     | Weak | 2037   | NM_001431 | M-003661-00 | YES |       |
| ESAM        | Weak | 90952  | NM_138961 | M-016663-00 |     |       |
| ESM1        | Weak | 11082  | NM_007036 | M-012338-01 |     |       |
| ETEA        | Weak | 23197  | NM_014613 | M-010649-00 |     |       |
| ETFDH       | Weak | 2110   | NM_004453 | M-008127-01 |     |       |
| EVA1        | Weak | 10205  | NM_005797 | M-017371-00 |     |       |
| FABP1       | Weak | 2168   | NM_001443 | M-008678-00 |     |       |
| FAIM        | Weak | 55179  | NM_018147 | M-020999-00 |     |       |
| FAM20A      | Weak | 54757  | NM_017565 | M-013773-00 |     |       |
| FAM29A      | Weak | 54801  | NM_017645 | M-018372-00 |     |       |
| FANCG       | Weak | 2189   | NM_004629 | M-011899-00 |     | FANCG |

|          |      |        |             |             |     |  |
|----------|------|--------|-------------|-------------|-----|--|
| FARS1    | Weak | 10667  | NM_006567   | M-012283-00 |     |  |
| FAT3     | Weak | 120114 | XM_061871   | M-026743-00 |     |  |
| FBXO7    | Weak | 25793  | NM_012179   | M-013606-00 |     |  |
| FBXW8    | Weak | 26259  | NM_012174   | M-012431-00 |     |  |
| FGF18    | Weak | 8817   | NM_003862   | M-011537-00 |     |  |
| FGF19    | Weak | 9965   | NM_005117   | M-013670-00 |     |  |
| FGF5     | Weak | 2250   | NM_004464   | M-011972-00 |     |  |
| FGF8     | Weak | 2253   | NM_006119   | M-013693-00 |     |  |
| FGFR4    | Weak | 2264   | NM_002011   | M-003134-01 |     |  |
| FHOD1    | Weak | 29109  | NM_013241   | M-013709-00 |     |  |
| FIGN     | Weak | 55137  | NM_018086   | M-010934-00 |     |  |
| FKBP11   | Weak | 51303  | NM_016594   | M-008200-00 |     |  |
| FKBP5    | Weak | 2289   | NM_004117   | M-004224-01 | YES |  |
| FLJ10060 | Weak | 55065  | NM_017986   | M-010712-00 |     |  |
| FLJ10986 | Weak | 55277  | NM_018291   | M-006810-00 |     |  |
| FLJ11029 | Weak | 55771  | NM_018304   | M-007019-00 |     |  |
| FLJ11151 | Weak | 55313  | NM_018340   | M-021262-00 |     |  |
| FLJ11712 | Weak | 79621  | NM_024570   | M-014369-00 |     |  |
| FLJ13063 | Weak | 79798  | NM_024742   | M-003999-00 |     |  |
| FLJ20071 | Weak | 54808  | NM_017653   | M-017498-00 |     |  |
| FLJ20421 | Weak | 54928  | NM_017813   | M-020804-00 |     |  |
| FLJ20519 | Weak | 54964  | NM_017860   | M-016312-00 |     |  |
| FLJ20641 | Weak | 55010  | NM_017915   | M-020943-00 |     |  |
| FLJ21657 | Weak | 64417  | NM_022483   | M-017127-00 |     |  |
| FLJ22173 | Weak | 80111  | NM_025041   | M-014563-00 |     |  |
| FLJ22800 | Weak | 79853  | NM_024795   | M-014450-00 |     |  |
| FLJ23322 | Weak | 80020  | NM_024955   | M-008133-00 |     |  |
| FLJ25070 | Weak | 55599  | NM_017619   | M-021646-00 |     |  |
| FLJ25415 | Weak | 150709 | XM_371586   | M-023108-00 |     |  |
| FLJ25471 | Weak | 137902 | NM_144651   | M-008450-00 |     |  |
| FLJ25590 | Weak | 283416 | NM_175895   | M-018068-00 |     |  |
| FLJ31052 | Weak | 127943 | NM_152378   | M-016275-00 |     |  |
| FLJ31413 | Weak | 155061 | NM_152557   | M-016992-00 |     |  |
| FLJ32682 | Weak | 220081 | NM_182542   | M-018973-00 |     |  |
| FLJ32949 | Weak | 283417 | NM_173812   | M-018272-00 |     |  |
| FLJ33215 | Weak | 259282 | NM_148894   | M-017033-00 | YES |  |
| FLJ33810 | Weak | 283422 | NM_182558   | M-018912-00 |     |  |
| FLJ34154 | Weak | 283450 | NM_173813   | M-018270-00 |     |  |
| FLJ34389 | Weak | 197259 | NM_152649   | M-005326-00 |     |  |
| FLJ34907 | Weak | 284222 | XM_290817   | M-023377-00 |     |  |
| FLJ36779 | Weak | 158055 | NM_152571   | M-016767-00 |     |  |
| FLJ38663 | Weak | 91574  | NM_152269   | M-016859-00 |     |  |
| FLJ38716 | Weak | 126868 | NM_152367   | M-016839-00 |     |  |
| FLJ39531 | Weak | 400360 | NM_207445   | M-032128-00 |     |  |
| FLJ39630 | Weak | 286183 | NM_173688   | M-018052-00 |     |  |
| FLJ40319 | Weak | 283982 | NM_182564   | M-018924-00 |     |  |
| FLJ43654 | Weak | 375341 | NM_198562   | M-031836-00 |     |  |
| FLJ44881 | Weak | 400661 | NM_207461   | M-032145-00 |     |  |
| FLJ45187 | Weak | 387640 | NM_207371   | M-032220-00 |     |  |
| FLJ45950 | Weak | 399975 | NM_207431   | M-032105-00 |     |  |
| FLJ45966 | Weak | 401120 | NM_00100170 | M-032322-00 |     |  |
| FLJ46211 | Weak | 401100 | NM_207487   | M-032174-00 |     |  |
| FMO1     | Weak | 2326   | NM_002021   | M-009255-01 |     |  |

|          |      |        |           |             |     |        |
|----------|------|--------|-----------|-------------|-----|--------|
| FMO4     | Weak | 2329   | NM_002022 | M-009418-00 |     |        |
| FMO5     | Weak | 2330   | NM_001461 | M-008136-00 |     |        |
| FMOD     | Weak | 2331   | NM_002023 | M-011661-00 |     |        |
| FOXD4L2  | Weak | 286380 | NM_199135 | M-032011-00 |     |        |
| FOXJ2    | Weak | 55810  | NM_018416 | M-009350-00 | YES |        |
| FRK      | Weak | 2444   | NM_002031 | M-003139-01 |     |        |
| FSHR     | Weak | 2492   | NM_000145 | M-005497-01 |     |        |
| FTCD     | Weak | 10841  | NM_006657 | M-008623-00 |     |        |
| FTH1     | Weak | 2495   | NM_002032 | M-019634-01 |     |        |
| FTSJ1    | Weak | 24140  | NM_012280 | M-012451-00 |     |        |
| FURIN    | Weak | 5045   | NM_002569 | M-005882-00 |     |        |
| G3BP     | Weak | 10146  | NM_005754 | M-012099-01 |     |        |
| GAB1     | Weak | 2549   | NM_002039 | M-003553-00 |     |        |
| GABRA2   | Weak | 2555   | NM_000807 | M-006163-01 |     |        |
| GABRA4   | Weak | 2557   | NM_000809 | M-006165-00 |     |        |
| GABRA5   | Weak | 2558   | NM_000810 | M-006166-00 |     |        |
| GABRR1   | Weak | 2569   | NM_002042 | M-006178-01 |     |        |
| GAGE4    | Weak | 2576   | NM_001474 | M-011275-00 |     |        |
| GALE     | Weak | 2582   | NM_000403 | M-009904-00 |     |        |
| GFAP     | Weak | 2670   | NM_002055 | M-011667-00 |     |        |
| GGN      | Weak | 199720 | NM_152657 | M-019177-00 |     |        |
| GIOT-1   | Weak | 92283  | NM_153257 | M-016102-00 |     |        |
| GLB1     | Weak | 2720   | NM_000404 | M-012539-00 |     |        |
| GLRB     | Weak | 2743   | NM_000824 | M-006183-00 |     |        |
| GLUL     | Weak | 2752   | NM_002065 | M-008228-00 |     |        |
| GM2A     | Weak | 2760   | NM_000405 | M-011044-00 |     |        |
| GNA12    | Weak | 2768   | NM_007353 | M-008435-00 |     |        |
| GNA13    | Weak | 10672  | NM_006572 | M-009948-00 |     |        |
| GNB2     | Weak | 2783   | NM_005273 | M-017241-00 |     |        |
| GNRHR2   | Weak | 114814 | NM_057163 | M-005518-00 |     |        |
| GPD2     | Weak | 2820   | NM_000408 | M-009843-01 |     |        |
| GPR120   | Weak | 338557 | NM_181745 | M-005703-01 |     |        |
| GPR133   | Weak | 283383 | NM_198827 | M-027093-00 |     |        |
| GPR149   | Weak | 344758 | XM_293580 | M-005697-00 |     |        |
| GPR30    | Weak | 2852   | NM_001505 | M-005563-01 |     |        |
| GRIA1    | Weak | 2890   | NM_000827 | M-006184-00 |     |        |
| GTF2H1   | Weak | 2965   | NM_005316 | M-010924-00 |     |        |
| HCA127   | Weak | 55906  | NM_018684 | M-007025-00 |     |        |
| HCN2     | Weak | 610    | NM_001194 | M-006201-01 |     |        |
| HEY2     | Weak | 23493  | NM_012259 | M-008223-00 |     |        |
| HIF3A    | Weak | 64344  | NM_022462 | M-010068-02 |     |        |
| HIP1     | Weak | 3092   | NM_005338 | M-005001-01 |     |        |
| HIRA     | Weak | 7290   | NM_003325 | M-013610-01 |     |        |
| HLA-DQA1 | Weak | 3117   | NM_002122 | M-013228-00 |     |        |
| HMG20A   | Weak | 10363  | NM_018200 | M-015454-00 |     |        |
| HMG20B   | Weak | 10362  | NM_006339 | M-020146-01 |     | HMG20B |
| HMOX1    | Weak | 3162   | NM_002133 | M-006372-01 |     |        |
| HOXA5    | Weak | 3202   | NM_019102 | M-017574-00 |     |        |
| HOXA7    | Weak | 3204   | NM_006896 | M-017573-00 |     |        |
| HOXB13   | Weak | 10481  | NM_006361 | M-012226-00 |     |        |
| HOXB6    | Weak | 3216   | NM_018952 | M-017336-00 | YES |        |
| HR       | Weak | 55806  | NM_005144 | M-011872-00 |     |        |
| HRAS     | Weak | 3265   | NM_005343 | M-004142-00 |     |        |

|           |      |        |           |             |     |  |
|-----------|------|--------|-----------|-------------|-----|--|
| HS322B1A  | Weak | 25774  | NM_015371 | M-020281-00 |     |  |
| HS747E2A  | Weak | 25770  | NM_015370 | M-020284-00 |     |  |
| HSGP25L2G | Weak | 54732  | NM_017510 | M-007924-00 |     |  |
| HSMPP8    | Weak | 54737  | NM_017520 | M-021680-00 |     |  |
| HSPA6     | Weak | 3310   | NM_002155 | M-019455-00 |     |  |
| HSU79274  | Weak | 29902  | NM_013300 | M-020401-00 |     |  |
| ICSBP1    | Weak | 3394   | NM_002163 | M-011699-00 |     |  |
| IDI2      | Weak | 91734  | NM_033261 | M-008463-00 |     |  |
| IFI27     | Weak | 3429   | NM_005532 | M-006465-01 |     |  |
| IFI35     | Weak | 3430   | NM_005533 | M-004203-00 |     |  |
| IFIT1     | Weak | 3434   | NM_001548 | M-019616-00 |     |  |
| IFIX      | Weak | 149628 | NM_152501 | M-016524-00 |     |  |
| IL15      | Weak | 3600   | NM_000585 | M-007934-01 |     |  |
| IL17RD    | Weak | 54756  | NM_017563 | M-007946-00 |     |  |
| IL17RE    | Weak | 132014 | NM_144640 | M-007947-00 |     |  |
| IL23R     | Weak | 149233 | NM_144701 | M-007976-00 |     |  |
| IL3       | Weak | 3562   | NM_000588 | M-007986-01 |     |  |
| IMPK      | Weak | 253430 | NM_152230 | M-006740-01 |     |  |
| ING1L     | Weak | 3622   | NM_001564 | M-006534-00 |     |  |
| INSR      | Weak | 3643   | NM_000208 | M-003014-01 |     |  |
| IPO13     | Weak | 9670   | NM_014652 | M-020212-00 |     |  |
| JARID1B   | Weak | 10765  | NM_006618 | M-009899-00 |     |  |
| JM11      | Weak | 90060  | NM_033626 | M-015130-00 | YES |  |
| JMJD2B    | Weak | 23030  | NM_015015 | M-004290-01 |     |  |
| KAB       | Weak | 9859   | NM_014812 | M-021258-00 | YES |  |
| KCNE1L    | Weak | 23630  | NM_012282 | M-012452-00 |     |  |
| KCNH6     | Weak | 81033  | NM_030779 | M-006236-01 |     |  |
| KCNJ2     | Weak | 3759   | NM_000891 | M-006247-00 |     |  |
| KCTD1     | Weak | 284252 | NM_198991 | M-027276-00 |     |  |
| KIAA0153  | Weak | 23170  | NM_015140 | M-014094-00 |     |  |
| KIAA0174  | Weak | 9798   | NM_014761 | M-020977-00 |     |  |
| KIAA0179  | Weak | 23076  | XM_371417 | M-031402-00 |     |  |
| KIAA0318  | Weak | 23504  | XM_044334 | M-027090-00 |     |  |
| KIAA0556  | Weak | 23247  | XM_044632 | M-003984-00 |     |  |
| KIAA0877  | Weak | 23333  | XM_371891 | M-025317-00 |     |  |
| KIAA0922  | Weak | 23240  | NM_015196 | M-019152-00 |     |  |
| KIAA1018  | Weak | 22909  | XM_375181 | M-020327-00 |     |  |
| KIAA1212  | Weak | 55704  | NM_018084 | M-032517-00 |     |  |
| KIAA1430  | Weak | 57587  | XM_087593 | M-024112-00 |     |  |
| KIAA1571  | Weak | 57683  | XM_371590 | M-028011-00 |     |  |
| KIAA1582  | Weak | 57690  | NM_018996 | M-019399-00 |     |  |
| KIAA1639  | Weak | 57729  | XM_290923 | M-005336-00 |     |  |
| KIAA1671  | Weak | 85379  | XM_371461 | M-024559-00 |     |  |
| KIAA1975  | Weak | 119385 | XM_370567 | M-026289-00 |     |  |
| KIAA1991  | Weak | 254225 | XM_495886 | M-032290-00 |     |  |
| KIAA2018  | Weak | 205717 | XM_291062 | M-023709-00 | YES |  |
| KLHL4     | Weak | 56062  | NM_019117 | M-012866-00 |     |  |
| KRTAP12-3 | Weak | 386683 | NM_198697 | M-031734-00 |     |  |
| KRTAP1-3  | Weak | 81850  | NM_030966 | M-013466-00 |     |  |
| KRTAP13-3 | Weak | 337960 | NM_181622 | M-018680-00 |     |  |
| KRTAP19-4 | Weak | 337971 | NM_181610 | M-018564-00 |     |  |
| KRTAP20-2 | Weak | 337976 | NM_181616 | M-018607-00 |     |  |
| LAMA1     | Weak | 284217 | NM_005559 | M-012118-00 |     |  |

|           |      |        |             |             |     |  |
|-----------|------|--------|-------------|-------------|-----|--|
| LAMB4     | Weak | 22798  | NM_007356   | M-025439-00 |     |  |
| LAPTM4A   | Weak | 9741   | NM_014713   | M-013439-00 |     |  |
| LCN10     | Weak | 414332 | NM_00100171 | M-032327-00 |     |  |
| LMCD1     | Weak | 29995  | NM_014583   | M-013567-00 |     |  |
| LNPEP     | Weak | 4012   | NM_005575   | M-005926-01 |     |  |
| LNX       | Weak | 84708  | NM_032622   | M-014940-00 |     |  |
| LOC116441 | Weak | 116441 | NM_138786   | M-016540-00 |     |  |
| LOC124871 | Weak | 124871 | XM_058857   | M-023210-00 |     |  |
| LOC126147 | Weak | 126147 | NM_145807   | M-016814-00 |     |  |
| LOC127099 | Weak | 127099 | XM_060328   | M-021888-00 |     |  |
| LOC129138 | Weak | 129138 | NM_138797   | M-016583-00 |     |  |
| LOC135946 | Weak | 135946 | XM_069621   | M-025383-00 |     |  |
| LOC139793 | Weak | 139793 | XM_060054   | M-024683-00 |     |  |
| LOC144100 | Weak | 144100 | NM_175058   | M-018008-00 |     |  |
| LOC149351 | Weak | 149351 | XM_378876   | M-027614-00 |     |  |
| LOC154822 | Weak | 154822 | XM_380162   | M-029221-00 |     |  |
| LOC196463 | Weak | 196463 | NM_173542   | M-018495-00 |     |  |
| LOC199920 | Weak | 199920 | NM_00100430 | M-032380-00 |     |  |
| LOC201164 | Weak | 201164 | NM_178836   | M-017858-00 |     |  |
| LOC201725 | Weak | 201725 | XM_376349   | M-028275-00 |     |  |
| LOC202051 | Weak | 202051 | XM_114430   | M-024410-00 |     |  |
| LOC219429 | Weak | 219429 | XM_166869   | M-026614-00 |     |  |
| LOC254897 | Weak | 23252  | XM_170950   | M-022066-00 |     |  |
| LOC254938 | Weak | DC     | XM_173120   | M-024132-00 |     |  |
| LOC255189 | Weak | 255189 | XM_172929   | M-010308-00 |     |  |
| LOC283155 | Weak | 283155 | XM_208545   | M-026548-00 |     |  |
| LOC283332 | Weak | 283332 | XM_378355   | M-030070-00 |     |  |
| LOC283398 | Weak | 283398 | XM_208658   | M-026908-00 |     |  |
| LOC283584 | Weak | 283584 | XM_211108   | M-021987-00 |     |  |
| LOC284274 | Weak | 284274 | XM_378756   | M-031049-00 |     |  |
| LOC284688 | Weak | 284688 | XM_378912   | M-027594-00 |     |  |
| LOC284933 | Weak | 284933 | XM_379064   | M-031503-00 |     |  |
| LOC285375 | Weak | 285375 | XM_376206   | M-028074-00 |     |  |
| LOC285548 | Weak | 285548 | XM_374078   | M-028345-00 |     |  |
| LOC285671 | Weak | 285671 | NM_178532   | M-017714-00 |     |  |
| LOC285694 | Weak | DC     | XM_211983   | M-024276-00 |     |  |
| LOC285872 | Weak | 285872 | XM_212061   | M-025230-00 |     |  |
| LOC286238 | Weak | 286238 | XM_379684   | M-029522-00 |     |  |
| LOC338588 | Weak | 338588 | XM_378207   | M-029706-00 |     |  |
| LOC339674 | Weak | 339674 | XM_379054   | M-031473-00 |     |  |
| LOC339903 | Weak | 339903 | XM_291063   | M-023472-00 |     |  |
| LOC340268 | Weak | 340268 | XM_294634   | M-025341-00 |     |  |
| LOC340543 | Weak | 340543 | XM_291334   | M-024781-00 |     |  |
| LOC340893 | Weak | 340893 | XM_291757   | M-026464-00 |     |  |
| LOC347273 | Weak | 347273 | XM_294592   | M-026220-00 |     |  |
| LOC348938 | Weak | 348938 | XM_371777   | M-024299-00 |     |  |
| LOC374768 | Weak | 374768 | NM_199339   | M-032109-00 |     |  |
| LOC374955 | Weak | 374955 | NM_198546   | M-031793-00 |     |  |
| LOC387700 | Weak | 387700 | NM_213606   | M-032549-00 |     |  |
| LOC387755 | Weak | 387755 | XM_370613   | M-029967-00 |     |  |
| LOC387763 | Weak | 387763 | XM_373497   | M-029981-00 | YES |  |
| LOC387781 | Weak | DC     | XM_370634   | M-029862-00 |     |  |
| LOC387849 | Weak | 387849 | XM_370686   | M-030132-00 |     |  |

|           |      |        |           |             |  |  |
|-----------|------|--------|-----------|-------------|--|--|
| LOC387859 | Weak | DC     | XM_373533 | M-030072-00 |  |  |
| LOC387894 | Weak | DC     | XM_370709 | M-030144-00 |  |  |
| LOC387895 | Weak | 387895 | XM_373553 | M-030146-00 |  |  |
| LOC388006 | Weak | DC     | XM_373602 | M-030320-00 |  |  |
| LOC388163 | Weak | 388163 | XM_370895 | M-030474-00 |  |  |
| LOC388220 | Weak | DC     | XM_373669 | M-030600-00 |  |  |
| LOC388226 | Weak | 388226 | XM_370946 | M-027173-00 |  |  |
| LOC388229 | Weak | DC     | XM_370949 | M-030611-00 |  |  |
| LOC388407 | Weak | 388407 | NM_203425 | M-031898-00 |  |  |
| LOC388424 | Weak | 55036  | XM_371081 | M-030952-00 |  |  |
| LOC388438 | Weak | 388438 | XM_371089 | M-030988-00 |  |  |
| LOC388478 | Weak | 388478 | XM_371118 | M-031059-00 |  |  |
| LOC388503 | Weak | 388503 | XM_371134 | M-031224-00 |  |  |
| LOC388538 | Weak | 399473 | XM_371165 | M-031104-00 |  |  |
| LOC388593 | Weak | DC     | XM_373826 | M-027392-00 |  |  |
| LOC388622 | Weak | DC     | XM_373839 | M-027461-00 |  |  |
| LOC388638 | Weak | DC     | XM_373845 | M-027482-00 |  |  |
| LOC388796 | Weak | 388796 | XM_373914 | M-031301-00 |  |  |
| LOC388853 | Weak | DC     | XM_371430 | M-031427-00 |  |  |
| LOC388887 | Weak | DC     | XM_373950 | M-031451-00 |  |  |
| LOC388893 | Weak | DC     | XM_373954 | M-031463-00 |  |  |
| LOC388952 | Weak | DC     | XM_373986 | M-027844-00 |  |  |
| LOC388960 | Weak | 388960 | XM_371500 | M-027857-00 |  |  |
| LOC389025 | Weak | 645733 | XM_374004 | M-027776-00 |  |  |
| LOC389029 | Weak | DC     | XM_374007 | M-027949-00 |  |  |
| LOC389117 | Weak | 389117 | XM_371638 | M-028104-00 |  |  |
| LOC389174 | Weak | 389174 | XM_371678 | M-028196-00 |  |  |
| LOC389189 | Weak | DC     | XM_374071 | M-028130-00 |  |  |
| LOC389236 | Weak | DC     | XM_374093 | M-028271-00 |  |  |
| LOC389331 | Weak | DC     | XM_374140 | M-028475-00 |  |  |
| LOC389366 | Weak | DC     | XM_371798 | M-028676-00 |  |  |
| LOC389416 | Weak | 389416 | XM_371837 | M-028580-00 |  |  |
| LOC389697 | Weak | 83481  | XM_372063 | M-029247-00 |  |  |
| LOC389778 | Weak | DC     | XM_374301 | M-029576-00 |  |  |
| LOC390113 | Weak | 390113 | XM_372376 | M-030034-00 |  |  |
| LOC390158 | Weak | 390158 | XM_372396 | M-029886-00 |  |  |
| LOC390234 | Weak | DC     | XM_372425 | M-029947-00 |  |  |
| LOC390282 | Weak | 390282 | XM_372447 | M-030165-00 |  |  |
| LOC390335 | Weak | 390335 | XM_372466 | M-030102-00 |  |  |
| LOC390423 | Weak | 390423 | XM_372496 | M-030194-00 |  |  |
| LOC390445 | Weak | 390445 | XM_372509 | M-030357-00 |  |  |
| LOC390712 | Weak | 390712 | XM_372630 | M-030763-00 |  |  |
| LOC390734 | Weak | DC     | XM_372640 | M-030646-00 |  |  |
| LOC391004 | Weak | 391004 | XM_372764 | M-027642-00 |  |  |
| LOC391211 | Weak | 391211 | XM_372842 | M-027744-00 |  |  |
| LOC391253 | Weak | 391253 | XM_372869 | M-031316-00 |  |  |
| LOC391282 | Weak | 391282 | XM_372878 | M-031386-00 |  |  |
| LOC391298 | Weak | DC     | XM_372889 | M-031432-00 |  |  |
| LOC391353 | Weak | DC     | XM_372917 | M-027767-00 |  |  |
| LOC391429 | Weak | 391429 | XM_372954 | M-027782-00 |  |  |
| LOC392634 | Weak | DC     | XM_374405 | M-028987-00 |  |  |
| LOC392636 | Weak | 392636 | XM_374406 | M-028988-00 |  |  |
| LOC392748 | Weak | 392748 | XM_374490 | M-031811-00 |  |  |

|           |      |    |        |           |             |     |  |
|-----------|------|----|--------|-----------|-------------|-----|--|
| LOC393076 | Weak |    | 393076 | XM_374763 | M-029222-00 |     |  |
| LOC399921 | Weak | DC |        | XM_374904 | M-029908-00 |     |  |
| LOC399959 | Weak |    | 399959 | XM_378316 | M-029813-00 |     |  |
| LOC399986 | Weak | DC |        | XM_378331 | M-030161-00 |     |  |
| LOC400087 | Weak |    | 400087 | XM_378392 | M-030147-00 |     |  |
| LOC400566 | Weak |    | 400566 | XM_375387 | M-030966-00 |     |  |
| LOC400685 | Weak |    | 400685 | XM_378795 | M-031088-00 |     |  |
| LOC400691 | Weak |    | 374900 | XM_378799 | M-031097-00 |     |  |
| LOC400804 | Weak |    | 400804 | XM_375841 | M-027379-00 |     |  |
| LOC400831 | Weak |    | 400831 | XM_378956 | M-031321-00 |     |  |
| LOC400937 | Weak | DC |        | XM_379068 | M-027889-00 |     |  |
| LOC400945 | Weak |    | 400945 | XM_379078 | M-027762-00 |     |  |
| LOC400949 | Weak |    | 400949 | XM_376048 | M-027828-00 |     |  |
| LOC400952 | Weak |    | 400952 | XM_376051 | M-027834-00 |     |  |
| LOC400955 | Weak |    | 400955 | XM_379096 | M-027845-00 |     |  |
| LOC401061 | Weak | DC |        | XM_379189 | M-028098-00 |     |  |
| LOC401085 | Weak | DC |        | XM_379210 | M-028153-00 |     |  |
| LOC401098 | Weak |    | 401098 | XM_379231 | M-028192-00 |     |  |
| LOC401207 | Weak |    | 401207 | XM_376423 | M-028463-00 |     |  |
| LOC401220 | Weak |    | 401220 | XM_379378 | M-028416-00 |     |  |
| LOC401237 | Weak |    | 401237 | XM_379398 | M-028680-00 |     |  |
| LOC401358 | Weak | DC |        | XM_379495 | M-028766-00 |     |  |
| LOC401509 | Weak |    | 401509 | XM_376841 | M-029461-00 |     |  |
| LOC401545 | Weak | DC |        | XM_379660 | M-029577-00 |     |  |
| LOC401599 | Weak | DC |        | XM_379716 | M-031584-00 |     |  |
| LOC401625 | Weak | DC |        | XM_377076 | M-031655-00 |     |  |
| LOC401704 | Weak | DC |        | XM_377231 | M-029928-00 |     |  |
| LOC401883 | Weak | DC |        | XM_377475 | M-030930-00 |     |  |
| LOC402072 | Weak | DC |        | XM_377741 | M-027884-00 |     |  |
| LOC402280 | Weak | DC |        | XM_377946 | M-028792-00 |     |  |
| LOC402388 | Weak | DC |        | XM_378103 | M-031642-00 |     |  |
| LOC402434 | Weak | DC |        | XM_378155 | M-031693-00 |     |  |
| LOC402596 | Weak | DC |        | XM_380146 | M-029141-00 |     |  |
| LOC64744  | Weak |    | 64744  | NM_022733 | M-014209-00 |     |  |
| LOC88523  | Weak |    | 88523  | NM_033111 | M-015066-00 |     |  |
| LOC92799  | Weak |    | 92799  | NM_138392 | M-015553-00 |     |  |
| LOC93432  | Weak |    | 93432  | XM_376684 | M-028862-00 |     |  |
| LONP      | Weak |    | 83752  | NM_031490 | M-005933-00 |     |  |
| LSM3      | Weak |    | 27258  | NM_014463 | M-020240-00 |     |  |
| LY6K      | Weak |    | 54742  | NM_017527 | M-013771-00 |     |  |
| M6PR      | Weak |    | 4074   | NM_002355 | M-010611-01 |     |  |
| MANBA     | Weak |    | 4126   | NM_005908 | M-012175-00 |     |  |
| MAPRE1    | Weak |    | 22919  | NM_012325 | M-006824-00 |     |  |
| MAS1      | Weak |    | 4142   | NM_002377 | M-003684-01 |     |  |
| MAS1L     | Weak |    | 116511 | NM_052967 | M-005655-01 |     |  |
| MASK-BP3  | Weak |    | 404734 | NM_020690 | M-032214-00 |     |  |
| MAT2B     | Weak |    | 27430  | NM_013283 | M-017193-00 |     |  |
| MATR3     | Weak |    | 9782   | NM_018834 | M-017382-00 |     |  |
| MCLC      | Weak |    | 23155  | NM_015127 | M-010024-00 |     |  |
| MERTK     | Weak |    | 10461  | NM_006343 | M-003155-01 |     |  |
| MGAT5     | Weak |    | 4249   | NM_002410 | M-011334-00 |     |  |
| MGC10485  | Weak |    | 112936 | NM_052875 | M-015152-00 | YES |  |
| MGC13010  | Weak |    | 84773  | NM_032687 | M-014961-00 |     |  |

|          |      |        |           |             |     |  |
|----------|------|--------|-----------|-------------|-----|--|
| MGC15763 | Weak | 92106  | NM_138381 | M-010186-00 |     |  |
| MGC19780 | Weak | 199857 | NM_144988 | M-017007-00 |     |  |
| MGC20419 | Weak | 112970 | NM_138417 | M-015576-00 |     |  |
| MGC26856 | Weak | 256710 | NM_152779 | M-016259-00 |     |  |
| MGC27348 | Weak | 256355 | XM_171158 | M-028819-00 |     |  |
| MGC33414 | Weak | 257101 | NM_173574 | M-018347-00 |     |  |
| MGC34830 | Weak | 120196 | NM_152314 | M-015982-00 |     |  |
| MGC35558 | Weak | 219833 | NM_145013 | M-016656-00 |     |  |
| MGC39558 | Weak | 148789 | NM_152490 | M-016736-00 |     |  |
| MGC39633 | Weak | 153733 | NM_152549 | M-015448-00 |     |  |
| MGC39662 | Weak | 131831 | NM_152394 | M-018760-00 |     |  |
| MGC42493 | Weak | 339500 | NM_178549 | M-018005-00 |     |  |
| MGC45922 | Weak | 284365 | XM_371187 | M-031135-00 |     |  |
| MGC4606  | Weak | 79447  | NM_024516 | M-003991-00 |     |  |
| MGC71999 | Weak | 342538 | NM_199290 | M-031849-00 |     |  |
| MGC9913  | Weak | 386759 | XM_378178 | M-031070-00 |     |  |
| MI-ER1   | Weak | 57708  | NM_020948 | M-014201-00 |     |  |
| MKNK2    | Weak | 2872   | NM_017572 | M-004908-01 |     |  |
| MLC1SA   | Weak | 140465 | NM_002475 | M-013090-00 |     |  |
| MLLT7    | Weak | 4303   | NM_005938 | M-003016-01 |     |  |
| MMEL2    | Weak | 79258  | NM_033467 | M-005950-00 |     |  |
| MMP10    | Weak | 4319   | NM_002425 | M-005952-01 |     |  |
| MMPL1    | Weak | 4328   | NM_004142 | M-009251-00 |     |  |
| MNDA     | Weak | 4332   | NM_002432 | M-010525-01 |     |  |
| MOCOS    | Weak | 55034  | NM_017947 | M-020993-00 |     |  |
| MOXD1    | Weak | 26002  | NM_015529 | M-009446-01 |     |  |
| MRGPRF   | Weak | 219928 | NM_145015 | M-005662-00 |     |  |
| MRO      | Weak | 83876  | NM_031939 | M-016832-00 |     |  |
| MRPL24   | Weak | 79590  | NM_024540 | M-017442-00 |     |  |
| MRPL33   | Weak | 9553   | NM_145330 | M-017401-00 |     |  |
| MRPS35   | Weak | 60488  | NM_021821 | M-013071-00 |     |  |
| MT1L     | Weak | 4500   | NR_001447 | M-010953-00 |     |  |
| MUC15    | Weak | 143662 | NM_145650 | M-015614-00 |     |  |
| MYBL1    | Weak | 4603   | XM_034274 | M-010526-00 |     |  |
| MYH1     | Weak | 4619   | NM_005963 | M-013486-00 |     |  |
| NCOA1    | Weak | 8648   | NM_003743 | M-005196-01 | YES |  |
| NDRG4    | Weak | 65009  | NM_020465 | M-013861-00 |     |  |
| NDUFA8   | Weak | 4702   | NM_014222 | M-012496-00 |     |  |
| NEDL1    | Weak | 23072  | NM_015052 | M-007186-00 |     |  |
| NEGR1    | Weak | 257194 | NM_173808 | M-018345-00 |     |  |
| NF2      | Weak | 4771   | NM_000268 | M-003917-00 |     |  |
| NKIRAS1  | Weak | 28512  | NM_020345 | M-021154-00 |     |  |
| NLN      | Weak | 57486  | NM_020726 | M-005977-00 |     |  |
| NOC4     | Weak | 10328  | NM_006067 | M-032511-00 |     |  |
| NOVA2    | Weak | 4858   | NM_002516 | M-012590-00 |     |  |
| NOX1     | Weak | 27035  | NM_007052 | M-010193-00 |     |  |
| NP220    | Weak | 27332  | NM_014497 | M-013715-00 | YES |  |
| NPL      | Weak | 80896  | NM_030769 | M-008230-00 |     |  |
| NPL4     | Weak | 55666  | NM_017921 | M-020796-00 |     |  |
| NR1I3    | Weak | 9970   | NM_005122 | M-003416-01 |     |  |
| NR2F6    | Weak | 2063   | NM_005234 | M-003423-00 |     |  |
| NRGN     | Weak | 4900   | NM_006176 | M-012186-00 |     |  |
| NTRK3    | Weak | 4916   | NM_002530 | M-003161-01 |     |  |



|         |      |        |             |             |     |        |
|---------|------|--------|-------------|-------------|-----|--------|
| OBP2B   | Weak | 29989  | NM_014581   | M-008879-00 |     |        |
| ODC1    | Weak | 4953   | NM_002539   | M-006668-00 |     |        |
| ODZ1    | Weak | 10178  | NM_014253   | M-020639-00 |     |        |
| OGT     | Weak | 8473   | NM_181672   | M-019111-00 |     |        |
| OR10A4  | Weak | 283297 | NM_207186   | M-032016-00 |     |        |
| OR10C1  | Weak | 442194 | NM_013941   | M-032515-00 |     |        |
| OR10G3  | Weak | 26533  | NM_00100546 | M-032457-00 |     |        |
| OR1F2P  | Weak | 26184  | XM_370931   | M-030679-00 |     |        |
| OR2AT4  | Weak | 341152 | NM_00100528 | M-032443-00 |     |        |
| OR2H1   | Weak | 26716  | NM_030883   | M-018165-00 |     |        |
| OR2Y1   | Weak | 134083 | NM_00100165 | M-032314-00 |     |        |
| OR4C15  | Weak | 81309  | NM_00100192 | M-032341-00 |     |        |
| OR6B2   | Weak | 389090 | NM_00100585 | M-032496-00 |     |        |
| OR6C68  | Weak | 403284 | NM_00100551 | M-032492-00 |     |        |
| OR7D2   | Weak | 162998 | XM_375563   | M-031219-00 |     |        |
| OR8J1   | Weak | 219477 | NM_00100520 | M-032417-00 |     |        |
| OSTBETA | Weak | 123264 | NM_178859   | M-018553-00 |     |        |
| PAPLN   | Weak | 89932  | XM_370765   | M-030307-00 |     |        |
| PCDH11Y | Weak | 83259  | NM_032971   | M-013624-00 |     |        |
| PCDH20  | Weak | 64881  | NM_022843   | M-012854-00 |     |        |
| PCDHB2  | Weak | 56133  | NM_018936   | M-013283-00 |     |        |
| PCDHGB1 | Weak | 56104  | NM_018922   | M-013292-00 |     |        |
| PCSK4   | Weak | 54760  | NM_017573   | M-013774-00 |     |        |
| PDHA1   | Weak | 5160   | NM_000284   | M-010329-01 |     |        |
| PF20    | Weak | 79582  | NM_024532   | M-016914-00 |     |        |
| PGAM1   | Weak | 5223   | NM_002629   | M-008883-01 |     |        |
| PGD     | Weak | 5226   | NM_002631   | M-008371-00 |     |        |
| PGPL    | Weak | 8225   | NM_012227   | M-019845-00 |     |        |
| PHF15   | Weak | 23338  | NM_015288   | M-018308-00 |     |        |
| PIGK    | Weak | 10026  | NM_005482   | M-005996-01 |     |        |
| PIGQ    | Weak | 9091   | NM_148920   | M-011909-00 |     |        |
| PIR     | Weak | 8544   | NM_003662   | M-012613-01 |     |        |
| PLA2G4A | Weak | 5321   | NM_024420   | M-009886-00 |     |        |
| PLCD1   | Weak | 5333   | NM_006225   | M-009149-00 |     |        |
| PMF1    | Weak | 11243  | NM_007221   | M-019662-00 |     |        |
| PNAS-4  | Weak | 51029  | NM_016076   | M-020915-00 |     |        |
| POLR3G  | Weak | 10622  | NM_006467   | M-020140-00 |     |        |
| POMT1   | Weak | 10585  | NM_007171   | M-016499-01 |     |        |
| PPM1A   | Weak | 5494   | NM_021003   | M-009574-01 |     |        |
| PPM2C   | Weak | 54704  | NM_018444   | M-008718-00 |     |        |
| PPP2R1A | Weak | 5518   | NM_014225   | M-010259-01 |     |        |
| PPP2R2B | Weak | 5521   | NM_004576   | M-003022-01 |     |        |
| PPP3R2  | Weak | 5535   | NM_147180   | M-016119-01 |     |        |
| PRDX2   | Weak | 7001   | NM_005809   | M-008178-01 |     |        |
| PRIC285 | Weak | 85441  | NM_033405   | M-019109-00 |     |        |
| PRKCL1  | Weak | 5585   | NM_002741   | M-004175-02 |     |        |
| PRR4    | Weak | 11272  | NM_007244   | M-012367-00 |     |        |
| PTGS1   | Weak | 5742   | NM_000962   | M-004556-00 |     |        |
| PTK6    | Weak | 5753   | NM_005975   | M-003166-01 |     |        |
| PVRL1   | Weak | 5818   | NM_002855   | M-004300-00 |     |        |
| PXT1    | Weak | 222659 | NM_152990   | M-016935-00 |     |        |
| RAB6A   | Weak | 5870   | NM_002869   | M-008975-01 |     |        |
| RAD23A  | Weak | 5886   | NM_005053   | M-005231-00 | YES | RAD23A |

|          |      |        |           |             |     |         |
|----------|------|--------|-----------|-------------|-----|---------|
| RALGPS1A | Weak | 9649   | NM_014636 | M-008248-00 |     |         |
| RAP2C    | Weak | 57826  | NM_021183 | M-010057-00 |     |         |
| RAPGEF1  | Weak | 2889   | NM_005312 | M-006840-00 |     |         |
| RASA2    | Weak | 5922   | NM_006506 | M-004333-00 |     |         |
| RASGRP4  | Weak | 115727 | NM_052949 | M-013425-00 |     |         |
| RASSF3   | Weak | 283349 | NM_178169 | M-018472-00 |     |         |
| RASSF6   | Weak | 166824 | NM_177532 | M-018468-00 |     |         |
| RBPMS    | Weak | 11030  | NM_006867 | M-012756-00 |     |         |
| RFP2     | Weak | 10206  | NM_005798 | M-006923-00 |     |         |
| RGR      | Weak | 5995   | NM_002921 | M-005721-01 |     |         |
| RHCG     | Weak | 51458  | NM_016321 | M-020938-00 |     |         |
| RIC-8    | Weak | 60626  | NM_021932 | M-016121-00 | YES |         |
| RIN2     | Weak | 54453  | NM_018993 | M-008173-00 |     |         |
| RLF      | Weak | 6018   | NM_012421 | M-006555-01 |     |         |
| RNF111   | Weak | 54778  | NM_017610 | M-007002-00 |     |         |
| RNF133   | Weak | 168433 | NM_139175 | M-007155-00 |     |         |
| RNF148   | Weak | 378925 | NM_198085 | M-010758-00 |     |         |
| RNF159   | Weak | 84333  | NM_032373 | M-007089-00 |     |         |
| RNF2     | Weak | 6045   | NM_007212 | M-006556-00 |     |         |
| RNF24    | Weak | 11237  | NM_007219 | M-006943-00 |     |         |
| ROBO2    | Weak | 6092   | XM_031246 | M-023273-00 |     |         |
| ROCK1    | Weak | 6093   | NM_005406 | M-003536-01 | YES |         |
| ROR2     | Weak | 4920   | NM_004560 | M-003172-01 | YES |         |
| RPGRIP1  | Weak | 57096  | NM_020366 | M-015479-01 |     |         |
| RPS6KC1  | Weak | 26750  | NM_012424 | M-005371-01 |     |         |
| RTN2     | Weak | 6253   | NM_005619 | M-012717-00 |     |         |
| SACS     | Weak | 26278  | NM_014363 | M-020571-00 |     |         |
| SATL1    | Weak | 340562 | XM_291339 | M-024771-00 |     |         |
| SBZF3    | Weak | 57116  | NM_020394 | M-013202-00 |     |         |
| SCAMP2   | Weak | 10066  | NM_005697 | M-003704-00 |     |         |
| SCN10A   | Weak | 6336   | NM_006514 | M-006295-00 |     |         |
| SEC31L1  | Weak | 22872  | NM_014933 | M-014166-00 |     |         |
| SEPHS2   | Weak | 22928  | NM_012248 | M-007738-00 |     |         |
| SHANK1   | Weak | 50944  | NM_016148 | M-031945-00 |     |         |
| SIAT1    | Weak | 6480   | NM_003032 | M-010486-01 |     |         |
| SIP      | Weak | 27101  | NM_014412 | M-012521-00 |     |         |
| SIT      | Weak | 27240  | NM_014450 | M-020250-00 |     |         |
| SLAMF9   | Weak | 89886  | NM_033438 | M-015109-00 |     |         |
| SLC22A11 | Weak | 55867  | NM_018484 | M-007445-00 |     |         |
| SLC22A15 | Weak | 55356  | NM_018420 | M-007449-00 |     |         |
| SLC26A6  | Weak | 65010  | NM_022911 | M-007494-00 |     |         |
| SLC35A5  | Weak | 55032  | NM_017945 | M-007541-00 |     |         |
| SLC35F2  | Weak | 54733  | NM_017515 | M-018216-00 |     |         |
| SLC35F5  | Weak | 80255  | NM_025181 | M-010744-00 |     |         |
| SLC39A9  | Weak | 55334  | NM_018375 | M-007574-01 |     |         |
| SLC4A11  | Weak | 83959  | NM_032034 | M-007581-00 |     |         |
| SLC4A3   | Weak | 6508   | NM_005070 | M-007583-01 |     |         |
| SLC5A6   | Weak | 8884   | NM_021095 | M-007594-00 |     |         |
| SLCO1C1  | Weak | 53919  | NM_017435 | M-007436-00 |     |         |
| SMARCD3  | Weak | 6604   | NM_003078 | M-009459-01 |     | SMARCD3 |
| SMOC2    | Weak | 64094  | NM_022138 | M-013886-00 |     |         |
| SOCS3    | Weak | 9021   | NM_003955 | M-004299-00 |     |         |
| SOSTDC1  | Weak | 25928  | NM_015464 | M-013959-00 |     |         |

|           |      |        |           |             |     |  |
|-----------|------|--------|-----------|-------------|-----|--|
| SOX17     | Weak | 64321  | NM_022454 | M-013028-00 |     |  |
| SOX9      | Weak | 6662   | NM_000346 | M-021507-00 |     |  |
| SPACA1    | Weak | 81833  | NM_030960 | M-013464-00 |     |  |
| SPG7      | Weak | 6687   | NM_003119 | M-006039-02 |     |  |
| SPINK2    | Weak | 6691   | NM_021114 | M-012759-00 |     |  |
| SPINT1    | Weak | 6692   | NM_003710 | M-004578-00 |     |  |
| SRM       | Weak | 6723   | NM_003132 | M-006669-00 |     |  |
| ST13      | Weak | 6767   | NM_003932 | M-017380-00 |     |  |
| STAP2     | Weak | 55620  | NM_017720 | M-021069-00 |     |  |
| SUHW3     | Weak | 55609  | NM_017666 | M-007013-00 | YES |  |
| SULF1     | Weak | 23213  | NM_015170 | M-006643-00 |     |  |
| TAGLN2    | Weak | 8407   | NM_003564 | M-011468-00 |     |  |
| TAS2R9    | Weak | 50835  | NM_023917 | M-010018-01 |     |  |
| TAZ       | Weak | 6901   | NM_000116 | M-009608-00 |     |  |
| TBX1      | Weak | 6899   | NM_005992 | M-012195-00 |     |  |
| TBX19     | Weak | 9095   | NM_005149 | M-011910-00 |     |  |
| TCEA1     | Weak | 6917   | NM_006756 | M-010496-00 | YES |  |
| TCF12     | Weak | 6938   | NM_003205 | M-006356-01 | YES |  |
| TCFL1     | Weak | 6944   | NM_005997 | M-020097-00 | YES |  |
| TEF       | Weak | 7008   | NM_003216 | M-008769-00 |     |  |
| TENC1     | Weak | 23371  | NM_015319 | M-009977-00 |     |  |
| TGDS      | Weak | 23483  | NM_014305 | M-009492-00 |     |  |
| TGIF2     | Weak | 60436  | NM_021809 | M-017124-00 |     |  |
| THAP5     | Weak | 168451 | NM_182529 | M-021462-00 |     |  |
| THAP7     | Weak | 80764  | NM_030573 | M-003821-00 |     |  |
| THEA      | Weak | 26027  | NM_015547 | M-008653-00 |     |  |
| THRAP5    | Weak | 10025  | NM_005481 | M-003736-00 |     |  |
| TIMP1     | Weak | 7076   | NM_003254 | M-011792-00 |     |  |
| TJP1      | Weak | 7082   | NM_003257 | M-007746-00 |     |  |
| TM4SF1    | Weak | 4071   | NM_014220 | M-010610-00 |     |  |
| TNFRSF13B | Weak | 23495  | NM_012452 | M-008095-00 |     |  |
| TNNI3     | Weak | 7137   | NM_000363 | M-020917-00 |     |  |
| TNXB      | Weak | 7148   | NM_019105 | M-008106-00 |     |  |
| TP53TG3   | Weak | 24150  | NM_015369 | M-020287-00 |     |  |
| TPR       | Weak | 7175   | NM_003292 | M-010548-01 | YES |  |
| TRAR1     | Weak | 134864 | NM_138327 | M-005736-00 |     |  |
| TRAR5     | Weak | 83551  | NM_053278 | M-005527-00 |     |  |
| TRIM40    | Weak | 135644 | NM_138700 | M-007129-00 |     |  |
| TRIP12    | Weak | 9320   | NM_004238 | M-007182-00 | YES |  |
| TRIT1     | Weak | 54802  | NM_017646 | M-018831-00 |     |  |
| TSC       | Weak | 54997  | NM_017899 | M-020896-00 |     |  |
| TTC12     | Weak | 54970  | NM_017868 | M-018220-00 |     |  |
| TTY7      | Weak | 83863  | NM_031926 | M-014755-00 |     |  |
| TUBB8     | Weak | 347688 | NM_177987 | M-027356-00 |     |  |
| TUBD1     | Weak | 51174  | NM_016261 | M-006843-00 |     |  |
| TUBGCP3   | Weak | 10426  | NM_006322 | M-018323-00 |     |  |
| TXNDC     | Weak | 81542  | NM_030755 | M-010675-00 |     |  |
| TXNDC4    | Weak | 23071  | XM_088476 | M-026181-00 |     |  |
| UGP2      | Weak | 7360   | NM_006759 | M-007739-02 |     |  |
| UGT8      | Weak | 7368   | NM_003360 | M-010270-01 |     |  |
| UHRF1     | Weak | 29128  | NM_013282 | M-006977-00 |     |  |
| UNC84B    | Weak | 25777  | NM_015374 | M-009959-00 |     |  |
| UNQ541    | Weak | 389376 | NM_205854 | M-031908-00 |     |  |

|          |                                  |        |           |             |  |  |
|----------|----------------------------------|--------|-----------|-------------|--|--|
| UNQ9341  | <a href="#">Weak</a>             | 283420 | NM_207345 | M-032040-00 |  |  |
| UQCRH    | <a href="#">Weak</a>             | 7388   | NM_006004 | M-020101-00 |  |  |
| URP      | <a href="#">Weak</a>             | 257313 | NM_198152 | M-021500-00 |  |  |
| USF2     | <a href="#">Weak</a>             | 7392   | NM_003367 | M-003618-00 |  |  |
| USP14    | <a href="#">Weak</a>             | 9097   | NM_005151 | M-006065-01 |  |  |
| VIL2     | <a href="#">Weak</a>             | 7430   | NM_003379 | M-017370-01 |  |  |
| VMD2L3   | <a href="#">Weak</a>             | 144453 | NM_152439 | M-016337-00 |  |  |
| VNN1     | <a href="#">Weak</a>             | 8876   | NM_004666 | M-011905-00 |  |  |
| VPS33B   | <a href="#">Weak</a>             | 26276  | NM_018668 | M-007261-00 |  |  |
| VWF      | <a href="#">Weak</a>             | 7450   | NM_000552 | M-009754-00 |  |  |
| WASF3    | <a href="#">Weak</a>             | 10810  | NM_006646 | M-012301-01 |  |  |
| WBSCR19  | <a href="#">Weak</a>             | 285955 | NM_175064 | M-019231-00 |  |  |
| WBSCR28  | <a href="#">Weak</a>             | 135886 | NM_182504 | M-018926-00 |  |  |
| WISP2    | <a href="#">Weak</a>             | 8839   | NM_003881 | M-010554-01 |  |  |
| XRN2     | <a href="#">Weak</a>             | 22803  | NM_012255 | M-017622-00 |  |  |
| XRRA1    | <a href="#">Weak</a>             | 143570 | XM_374912 | M-029916-00 |  |  |
| YWHAH    | <a href="#">Weak</a>             | 7533   | NM_003405 | M-010626-00 |  |  |
| ZBTB12   | <a href="#">Weak</a>             | 221527 | NM_181842 | M-018786-00 |  |  |
| ZBTB7    | <a href="#">Weak</a>             | 51341  | NM_015898 | M-020818-00 |  |  |
| ZFYVE20  | <a href="#">Weak</a>             | 64145  | NM_022340 | M-014036-00 |  |  |
| ZMYND19  | <a href="#">Weak</a>             | 116225 | NM_138462 | M-021402-00 |  |  |
| ZNF143   | <a href="#">Weak</a>             | 7702   | NM_003442 | M-013965-00 |  |  |
| ZNF146   | <a href="#">Weak</a>             | 7705   | NM_007145 | M-019625-00 |  |  |
| ZNF181   | <a href="#">Weak</a>             | 339318 | XM_290835 | M-023641-00 |  |  |
| ZNF189   | <a href="#">Weak</a>             | 7743   | NM_003452 | M-021350-00 |  |  |
| ZNF267   | <a href="#">Weak</a>             | 10308  | NM_003414 | M-015637-00 |  |  |
| ZNF33A   | <a href="#">Weak</a>             | 7581   | NM_006974 | M-012776-00 |  |  |
| ZNF406   | <a href="#">Weak</a>             | 57623  | NM_020863 | M-025840-00 |  |  |
| ZNF584   | <a href="#">Weak</a>             | 201514 | NM_173548 | M-018489-00 |  |  |
| A1BG     | <a href="#">Cytotoxic Bypass</a> | 1      | NM_130786 | M-011191-00 |  |  |
| AATK     | <a href="#">Cytotoxic Bypass</a> | 9625   | XM_375495 | M-005301-01 |  |  |
| ABCA3    | <a href="#">Cytotoxic Bypass</a> | 21     | NM_001089 | M-008795-00 |  |  |
| ACCN1    | <a href="#">Cytotoxic Bypass</a> | 40     | NM_001094 | M-006105-00 |  |  |
| ACY-3    | <a href="#">Cytotoxic Bypass</a> | 91703  | NM_080658 | M-010400-00 |  |  |
| ADAM33   | <a href="#">Cytotoxic Bypass</a> | 80332  | NM_025220 | M-004525-00 |  |  |
| ADAMTS10 | <a href="#">Cytotoxic Bypass</a> | 81794  | NM_030957 | M-005762-00 |  |  |
| ADAMTSL3 | <a href="#">Cytotoxic Bypass</a> | 57188  | NM_207517 | M-022416-00 |  |  |
| ALDRL6   | <a href="#">Cytotoxic Bypass</a> | 55586  | NM_017584 | M-019473-00 |  |  |
| ALLC     | <a href="#">Cytotoxic Bypass</a> | 55821  | NM_018436 | M-020523-00 |  |  |
| ANAPC1   | <a href="#">Cytotoxic Bypass</a> | 64682  | NM_022662 | M-013843-01 |  |  |
| ANAPC4   | <a href="#">Cytotoxic Bypass</a> | 29945  | NM_013367 | M-013642-00 |  |  |
| ANAPC5   | <a href="#">Cytotoxic Bypass</a> | 51433  | NM_016237 | M-016095-00 |  |  |
| APBA2    | <a href="#">Cytotoxic Bypass</a> | 321    | NM_005503 | M-017413-00 |  |  |
| APRG1    | <a href="#">Cytotoxic Bypass</a> | 339883 | NM_178340 | M-017640-00 |  |  |
| AQP12    | <a href="#">Cytotoxic Bypass</a> | 375318 | NM_198998 | M-032245-00 |  |  |
| AREG     | <a href="#">Cytotoxic Bypass</a> | 374    | NM_001657 | M-017435-00 |  |  |
| ARRDC1   | <a href="#">Cytotoxic Bypass</a> | 92714  | NM_152285 | M-015918-00 |  |  |
| ASB11    | <a href="#">Cytotoxic Bypass</a> | 140456 | NM_080873 | M-013267-00 |  |  |
| ASH1L    | <a href="#">Cytotoxic Bypass</a> | 55870  | NM_018489 | M-020460-00 |  |  |
| ASPH     | <a href="#">Cytotoxic Bypass</a> | 444    | NM_004318 | M-004294-00 |  |  |
| ATP1B3   | <a href="#">Cytotoxic Bypass</a> | 483    | NM_001679 | M-004569-00 |  |  |
| ATP5L2   | <a href="#">Cytotoxic Bypass</a> | 267020 | NM_198822 | M-031764-00 |  |  |
| ATP8B3   | <a href="#">Cytotoxic Bypass</a> | 148229 | NM_138813 | M-023898-00 |  |  |

|           |                                  |        |           |             |     |        |
|-----------|----------------------------------|--------|-----------|-------------|-----|--------|
| B3GALT6   | <a href="#">Cytotoxic Bypass</a> | 126792 | NM_080605 | M-021340-00 |     |        |
| BAT4      | <a href="#">Cytotoxic Bypass</a> | 7918   | NM_033177 | M-013701-00 |     |        |
| BBS7      | <a href="#">Cytotoxic Bypass</a> | 55212  | NM_018190 | M-013346-00 |     |        |
| BTN2A3    | <a href="#">Cytotoxic Bypass</a> | 54718  | NM_024018 | M-021361-00 |     |        |
| C10ORF45  | <a href="#">Cytotoxic Bypass</a> | 83641  | NM_031453 | M-014732-00 |     |        |
| C10ORF64  | <a href="#">Cytotoxic Bypass</a> | 159491 | NM_173524 | M-018526-00 |     |        |
| C10ORF75  | <a href="#">Cytotoxic Bypass</a> | 90271  | XM_030445 | M-026305-00 |     |        |
| C13ORF23  | <a href="#">Cytotoxic Bypass</a> | 80209  | NM_025138 | M-012952-00 |     |        |
| C15ORF16  | <a href="#">Cytotoxic Bypass</a> | 161725 | NM_130901 | M-008841-00 |     |        |
| C1ORF19   | <a href="#">Cytotoxic Bypass</a> | 116461 | NM_052965 | M-015177-00 |     |        |
| C1QTNF8   | <a href="#">Cytotoxic Bypass</a> | 390664 | NM_207419 | M-032097-00 |     |        |
| C20ORF158 | <a href="#">Cytotoxic Bypass</a> | 85362  | NM_152302 | M-016827-00 |     |        |
| C20ORF22  | <a href="#">Cytotoxic Bypass</a> | 26090  | NM_015600 | M-005850-00 |     |        |
| C20ORF28  | <a href="#">Cytotoxic Bypass</a> | 25876  | NM_015417 | M-017050-00 |     |        |
| C20ORF99  | <a href="#">Cytotoxic Bypass</a> | 85364  | NM_033089 | M-017978-00 |     |        |
| C21ORF62  | <a href="#">Cytotoxic Bypass</a> | 56245  | NM_019596 | M-021062-00 |     |        |
| C21ORF69  | <a href="#">Cytotoxic Bypass</a> | 84537  | NM_058189 | M-015220-00 |     |        |
| C21ORF70  | <a href="#">Cytotoxic Bypass</a> | 85395  | NM_058190 | M-015221-00 |     |        |
| C21ORF99  | <a href="#">Cytotoxic Bypass</a> | 149992 | NM_153773 | M-016165-00 |     |        |
| C5ORF5    | <a href="#">Cytotoxic Bypass</a> | 51306  | NM_016603 | M-020738-00 |     |        |
| C6ORF168  | <a href="#">Cytotoxic Bypass</a> | 84553  | NM_032511 | M-014910-00 |     |        |
| C9ORF125  | <a href="#">Cytotoxic Bypass</a> | 84302  | NM_032342 | M-014865-00 |     |        |
| C9ORF154  | <a href="#">Cytotoxic Bypass</a> | 158326 | NM_144966 | M-017026-00 |     |        |
| C9ORF156  | <a href="#">Cytotoxic Bypass</a> | 51531  | NM_016481 | M-014262-00 |     |        |
| C9ORF48   | <a href="#">Cytotoxic Bypass</a> | 347240 | NM_194313 | M-010459-00 |     |        |
| CATSPER4  | <a href="#">Cytotoxic Bypass</a> | 378807 | XM_371237 | M-027514-00 |     |        |
| CCDC5     | <a href="#">Cytotoxic Bypass</a> | 115106 | NM_138443 | M-015491-00 |     |        |
| CCR6      | <a href="#">Cytotoxic Bypass</a> | 1235   | NM_004367 | M-005453-00 |     |        |
| CD2BP2    | <a href="#">Cytotoxic Bypass</a> | 10421  | NM_006110 | M-020057-00 |     |        |
| CD79A     | <a href="#">Cytotoxic Bypass</a> | 973    | NM_001783 | M-011606-00 |     |        |
| CDC23     | <a href="#">Cytotoxic Bypass</a> | 8697   | NM_004661 | M-009523-00 |     |        |
| CDC27     | <a href="#">Cytotoxic Bypass</a> | 996    | NM_001256 | M-003229-03 |     |        |
| CDC5L     | <a href="#">Cytotoxic Bypass</a> | 988    | NM_001253 | M-011237-00 |     |        |
| CENTD2    | <a href="#">Cytotoxic Bypass</a> | 116985 | NM_015242 | M-009136-00 |     |        |
| CGI-100   | <a href="#">Cytotoxic Bypass</a> | 50999  | NM_016040 | M-007854-00 |     |        |
| CGI-116   | <a href="#">Cytotoxic Bypass</a> | 51019  | NM_016053 | M-020900-00 |     |        |
| CHAF1B    | <a href="#">Cytotoxic Bypass</a> | 8208   | NM_005441 | M-019937-00 |     | CHAF1B |
| CHCHD5    | <a href="#">Cytotoxic Bypass</a> | 84269  | NM_032309 | M-014849-00 |     |        |
| CHEK1     | <a href="#">Cytotoxic Bypass</a> | 1111   | NM_001274 | M-003255-02 | YES | CHEK1  |
| CILP2     | <a href="#">Cytotoxic Bypass</a> | 148113 | NM_153221 | M-015654-00 |     |        |
| CLIC3     | <a href="#">Cytotoxic Bypass</a> | 9022   | NM_004669 | M-011805-00 |     |        |
| CMKOR1    | <a href="#">Cytotoxic Bypass</a> | 57007  | NM_020311 | M-013212-00 |     |        |
| CNN1      | <a href="#">Cytotoxic Bypass</a> | 1264   | NM_001299 | M-015851-00 |     |        |
| CNNM1     | <a href="#">Cytotoxic Bypass</a> | 26507  | NM_020348 | M-020830-00 |     |        |
| COL14A1   | <a href="#">Cytotoxic Bypass</a> | 7373   | XM_044622 | M-025907-00 |     |        |
| COL6A3    | <a href="#">Cytotoxic Bypass</a> | 1293   | NM_004369 | M-003646-01 |     |        |
| COL9A1    | <a href="#">Cytotoxic Bypass</a> | 1297   | NM_001851 | M-011622-00 |     |        |
| COMMD2    | <a href="#">Cytotoxic Bypass</a> | 51122  | NM_016094 | M-021024-00 |     |        |
| CORO1B    | <a href="#">Cytotoxic Bypass</a> | 57175  | NM_020441 | M-010493-00 |     |        |
| CORO1C    | <a href="#">Cytotoxic Bypass</a> | 23603  | NM_014325 | M-017331-00 |     |        |
| COX6B1    | <a href="#">Cytotoxic Bypass</a> | 1340   | NM_001863 | M-013148-00 |     |        |
| COX8C     | <a href="#">Cytotoxic Bypass</a> | 341947 | NM_182971 | M-019415-00 |     |        |
| CPSF1     | <a href="#">Cytotoxic Bypass</a> | 29894  | NM_013291 | M-020395-00 |     |        |

|             |                                  |        |           |             |     |          |
|-------------|----------------------------------|--------|-----------|-------------|-----|----------|
| CTAG1A      | <a href="#">Cytotoxic Bypass</a> | 246100 | NM_139250 | M-016967-00 |     |          |
| CTRC        | <a href="#">Cytotoxic Bypass</a> | 11330  | NM_007272 | M-005833-00 |     |          |
| CUTL2       | <a href="#">Cytotoxic Bypass</a> | 23316  | XM_027045 | M-027122-00 |     |          |
| CYBB        | <a href="#">Cytotoxic Bypass</a> | 1536   | NM_000397 | M-011021-00 |     |          |
| CYP51A1     | <a href="#">Cytotoxic Bypass</a> | 1595   | NM_000786 | M-009215-00 |     |          |
| D6S2654E    | <a href="#">Cytotoxic Bypass</a> | 26240  | NM_012135 | M-019978-00 |     |          |
| DDHD2       | <a href="#">Cytotoxic Bypass</a> | 23259  | XM_291291 | M-025979-00 |     |          |
| DEFA1       | <a href="#">Cytotoxic Bypass</a> | 1667   | NM_004084 | M-012999-00 |     |          |
| DHRS4       | <a href="#">Cytotoxic Bypass</a> | 10901  | NM_021004 | M-008576-00 |     |          |
| DHRS4L2     | <a href="#">Cytotoxic Bypass</a> | 317749 | NM_198083 | M-021490-00 |     |          |
| DHX40       | <a href="#">Cytotoxic Bypass</a> | 79665  | NM_024612 | M-018727-00 |     |          |
| DKFZP434E18 | <a href="#">Cytotoxic Bypass</a> | 92216  | XM_043624 | M-023470-00 |     |          |
| DKFZP434L18 | <a href="#">Cytotoxic Bypass</a> | 26082  | XM_375171 | M-030372-00 |     |          |
| DKFZP434N19 | <a href="#">Cytotoxic Bypass</a> | 81858  | NM_030974 | M-018575-00 |     |          |
| DKFZP586P01 | <a href="#">Cytotoxic Bypass</a> | 26005  | NM_015531 | M-026690-00 |     |          |
| DKFZP686J08 | <a href="#">Cytotoxic Bypass</a> | 341640 | XM_292193 | M-021693-00 |     |          |
| DKFZP761I10 | <a href="#">Cytotoxic Bypass</a> | 84239  | NM_032279 | M-023682-00 |     |          |
| DLK1        | <a href="#">Cytotoxic Bypass</a> | 8788   | NM_003836 | M-015911-00 |     |          |
| DOCK11      | <a href="#">Cytotoxic Bypass</a> | 139818 | NM_144658 | M-015696-00 | YES |          |
| DONSON      | <a href="#">Cytotoxic Bypass</a> | 29980  | NM_145794 | M-017453-00 |     |          |
| DPF1        | <a href="#">Cytotoxic Bypass</a> | 8193   | NM_004647 | M-031779-00 |     |          |
| EAF1        | <a href="#">Cytotoxic Bypass</a> | 85403  | NM_033083 | M-019284-00 |     |          |
| EB-1        | <a href="#">Cytotoxic Bypass</a> | 56899  | NM_020140 | M-008192-00 |     |          |
| ENAH        | <a href="#">Cytotoxic Bypass</a> | 55740  | NM_018212 | M-021932-00 | YES |          |
| ENTPD2      | <a href="#">Cytotoxic Bypass</a> | 954    | NM_001246 | M-010736-00 |     |          |
| EPM2AIP1    | <a href="#">Cytotoxic Bypass</a> | 9852   | NM_014805 | M-018914-00 |     |          |
| ETFA        | <a href="#">Cytotoxic Bypass</a> | 2108   | NM_000126 | M-011029-00 |     |          |
| ETHE1       | <a href="#">Cytotoxic Bypass</a> | 23474  | NM_014297 | M-012508-00 |     |          |
| EXOC7       | <a href="#">Cytotoxic Bypass</a> | 23265  | NM_015219 | M-021448-00 |     |          |
| EXOSC7      | <a href="#">Cytotoxic Bypass</a> | 23016  | NM_015004 | M-014160-00 |     |          |
| F7          | <a href="#">Cytotoxic Bypass</a> | 2155   | NM_000131 | M-005871-00 |     |          |
| FAM38A      | <a href="#">Cytotoxic Bypass</a> | 9780   | NM_014745 | M-020870-00 |     |          |
| FBXO6       | <a href="#">Cytotoxic Bypass</a> | 26270  | NM_018438 | M-013314-00 |     |          |
| FLJ12436    | <a href="#">Cytotoxic Bypass</a> | 79714  | NM_024661 | M-016444-00 |     |          |
| FLJ12505    | <a href="#">Cytotoxic Bypass</a> | 79805  | NM_024749 | M-018929-00 |     |          |
| FLJ12606    | <a href="#">Cytotoxic Bypass</a> | 79862  | NM_024804 | M-014454-00 |     |          |
| FLJ13265    | <a href="#">Cytotoxic Bypass</a> | 79935  | NM_024877 | M-014496-00 |     |          |
| FLJ13639    | <a href="#">Cytotoxic Bypass</a> | 79758  | NM_024705 | M-014418-00 |     |          |
| FLJ14075    | <a href="#">Cytotoxic Bypass</a> | 79954  | NM_024894 | M-014505-00 |     |          |
| FLJ16046    | <a href="#">Cytotoxic Bypass</a> | 389208 | NM_207407 | M-032084-00 |     |          |
| FLJ20694    | <a href="#">Cytotoxic Bypass</a> | 55018  | NM_017928 | M-020969-00 |     |          |
| FLJ21749    | <a href="#">Cytotoxic Bypass</a> | 80194  | NM_025124 | M-014594-00 |     |          |
| FLJ21816    | <a href="#">Cytotoxic Bypass</a> | 79728  | NM_024675 | M-012928-00 | YES | FLJ21816 |
| FLJ22386    | <a href="#">Cytotoxic Bypass</a> | 79641  | NM_024589 | M-014379-00 |     |          |
| FLJ22573    | <a href="#">Cytotoxic Bypass</a> | 79713  | NM_024660 | M-014401-00 |     |          |
| FLJ25404    | <a href="#">Cytotoxic Bypass</a> | 146378 | XM_085433 | M-003995-00 |     |          |
| FLJ25715    | <a href="#">Cytotoxic Bypass</a> | 284241 | NM_182570 | M-018674-00 |     |          |
| FLJ25778    | <a href="#">Cytotoxic Bypass</a> | 254048 | XM_376679 | M-025464-00 | YES |          |
| FLJ31846    | <a href="#">Cytotoxic Bypass</a> | 160857 | NM_144974 | M-016742-00 |     |          |
| FLJ32440    | <a href="#">Cytotoxic Bypass</a> | 286053 | NM_173685 | M-018070-00 |     |          |
| FLJ32926    | <a href="#">Cytotoxic Bypass</a> | 93233  | NM_144577 | M-016370-00 |     |          |
| FLJ33708    | <a href="#">Cytotoxic Bypass</a> | 285780 | NM_173675 | M-018087-00 |     |          |
| FLJ34512    | <a href="#">Cytotoxic Bypass</a> | 124093 | NM_173476 | M-018400-00 |     |          |

|           |                                  |        |           |             |  |  |
|-----------|----------------------------------|--------|-----------|-------------|--|--|
| FLJ35681  | <a href="#">Cytotoxic Bypass</a> | 283897 | NM_175900 | M-003990-00 |  |  |
| FLJ36131  | <a href="#">Cytotoxic Bypass</a> | 338999 | NM_182604 | M-018875-00 |  |  |
| FLJ36760  | <a href="#">Cytotoxic Bypass</a> | 374992 | NM_198550 | M-031804-00 |  |  |
| FLJ37478  | <a href="#">Cytotoxic Bypass</a> | 339983 | NM_178557 | M-009115-00 |  |  |
| FLJ39553  | <a href="#">Cytotoxic Bypass</a> | 203111 | NM_173549 | M-018487-00 |  |  |
| FLJ40142  | <a href="#">Cytotoxic Bypass</a> | 400073 | NM_207435 | M-032112-00 |  |  |
| FLJ41287  | <a href="#">Cytotoxic Bypass</a> | 388121 | NM_207381 | M-032059-00 |  |  |
| FLJ43808  | <a href="#">Cytotoxic Bypass</a> | 400083 | NM_207438 | M-032118-00 |  |  |
| FLJ44670  | <a href="#">Cytotoxic Bypass</a> | 375096 | NM_199181 | M-027265-00 |  |  |
| FLJ44861  | <a href="#">Cytotoxic Bypass</a> | 388428 | NM_207389 | M-032067-00 |  |  |
| FLJ46358  | <a href="#">Cytotoxic Bypass</a> | 400110 | NM_207439 | M-032225-00 |  |  |
| FLJ90637  | <a href="#">Cytotoxic Bypass</a> | 374987 | NM_199343 | M-032116-00 |  |  |
| FN5       | <a href="#">Cytotoxic Bypass</a> | 56935  | NM_020179 | M-020414-00 |  |  |
| FOXP4     | <a href="#">Cytotoxic Bypass</a> | 116113 | NM_138457 | M-008255-00 |  |  |
| FSHB      | <a href="#">Cytotoxic Bypass</a> | 2488   | NM_000510 | M-012537-00 |  |  |
| FXYD7     | <a href="#">Cytotoxic Bypass</a> | 53822  | NM_022006 | M-013056-00 |  |  |
| GATM      | <a href="#">Cytotoxic Bypass</a> | 2628   | NM_001482 | M-008900-00 |  |  |
| GBP4      | <a href="#">Cytotoxic Bypass</a> | 115361 | NM_052941 | M-018177-00 |  |  |
| GCAT      | <a href="#">Cytotoxic Bypass</a> | 23464  | NM_014291 | M-009547-00 |  |  |
| GORASP1   | <a href="#">Cytotoxic Bypass</a> | 64689  | NM_031899 | M-013510-00 |  |  |
| GPT       | <a href="#">Cytotoxic Bypass</a> | 2875   | NM_005309 | M-031622-00 |  |  |
| GPT2      | <a href="#">Cytotoxic Bypass</a> | 84706  | NM_133443 | M-004173-01 |  |  |
| H2BFS     | <a href="#">Cytotoxic Bypass</a> | 54145  | NM_017445 | M-010901-00 |  |  |
| HDAC4     | <a href="#">Cytotoxic Bypass</a> | 9759   | NM_006037 | M-003497-02 |  |  |
| HEAB      | <a href="#">Cytotoxic Bypass</a> | 10978  | NM_006831 | M-019895-00 |  |  |
| HEG       | <a href="#">Cytotoxic Bypass</a> | 57493  | XM_087386 | M-023585-00 |  |  |
| HH114     | <a href="#">Cytotoxic Bypass</a> | 84529  | NM_032499 | M-014906-00 |  |  |
| HIP1R     | <a href="#">Cytotoxic Bypass</a> | 9026   | NM_003959 | M-027079-00 |  |  |
| HIP-55    | <a href="#">Cytotoxic Bypass</a> | 28988  | NM_014063 | M-016867-00 |  |  |
| HIST1H1B  | <a href="#">Cytotoxic Bypass</a> | 3009   | NM_005322 | M-012049-00 |  |  |
| HIST1H2BC | <a href="#">Cytotoxic Bypass</a> | 8347   | NM_003526 | M-011446-00 |  |  |
| HIST1H2BF | <a href="#">Cytotoxic Bypass</a> | 8343   | NM_003522 | M-011442-00 |  |  |
| HIST3H3   | <a href="#">Cytotoxic Bypass</a> | 8290   | NM_003493 | M-011429-00 |  |  |
| HLF       | <a href="#">Cytotoxic Bypass</a> | 3131   | NM_002126 | M-010514-00 |  |  |
| HM13      | <a href="#">Cytotoxic Bypass</a> | 81502  | NM_030789 | M-005896-01 |  |  |
| HPGD      | <a href="#">Cytotoxic Bypass</a> | 3248   | NM_000860 | M-008700-00 |  |  |
| HSF1      | <a href="#">Cytotoxic Bypass</a> | 3297   | NM_005526 | M-012109-00 |  |  |
| HSPC065   | <a href="#">Cytotoxic Bypass</a> | 29070  | NM_014157 | M-015391-00 |  |  |
| HSPC242   | <a href="#">Cytotoxic Bypass</a> | 51537  | NM_016498 | M-021196-00 |  |  |
| HYAL4     | <a href="#">Cytotoxic Bypass</a> | 23553  | NM_012269 | M-012447-00 |  |  |
| ITGB5     | <a href="#">Cytotoxic Bypass</a> | 3693   | NM_002213 | M-004125-00 |  |  |
| K6HF      | <a href="#">Cytotoxic Bypass</a> | 9119   | NM_004693 | M-019835-00 |  |  |
| KCTD3     | <a href="#">Cytotoxic Bypass</a> | 51133  | NM_016121 | M-021032-00 |  |  |
| KERA      | <a href="#">Cytotoxic Bypass</a> | 11081  | NM_007035 | M-012764-00 |  |  |
| KIAA0586  | <a href="#">Cytotoxic Bypass</a> | 9786   | NM_014749 | M-020892-00 |  |  |
| KIAA0870  | <a href="#">Cytotoxic Bypass</a> | 22898  | XM_088315 | M-025843-00 |  |  |
| KIAA1040  | <a href="#">Cytotoxic Bypass</a> | 23041  | XM_051091 | M-026971-00 |  |  |
| KIAA1194  | <a href="#">Cytotoxic Bypass</a> | 57472  | NM_015455 | M-019101-00 |  |  |
| KIAA1271  | <a href="#">Cytotoxic Bypass</a> | 57506  | NM_020746 | M-024237-00 |  |  |
| KIAA1407  | <a href="#">Cytotoxic Bypass</a> | 57577  | NM_020817 | M-014068-00 |  |  |
| KIAA1466  | <a href="#">Cytotoxic Bypass</a> | 57612  | XM_371953 | M-028936-00 |  |  |
| KIAA1510  | <a href="#">Cytotoxic Bypass</a> | 57642  | NM_020882 | M-024094-00 |  |  |
| KIAA1602  | <a href="#">Cytotoxic Bypass</a> | 57701  | XM_035497 | M-026953-00 |  |  |

|           |                                  |        |           |             |  |  |
|-----------|----------------------------------|--------|-----------|-------------|--|--|
| KIAA1826  | <a href="#">Cytotoxic Bypass</a> | 84437  | XM_370653 | M-026510-00 |  |  |
| KIAA1919  | <a href="#">Cytotoxic Bypass</a> | 91749  | NM_153369 | M-010748-00 |  |  |
| KIBRA     | <a href="#">Cytotoxic Bypass</a> | 23286  | NM_015238 | M-014058-00 |  |  |
| KIF12     | <a href="#">Cytotoxic Bypass</a> | 113220 | NM_138424 | M-008252-01 |  |  |
| KLK13     | <a href="#">Cytotoxic Bypass</a> | 26085  | NM_015596 | M-005910-00 |  |  |
| KLRC3     | <a href="#">Cytotoxic Bypass</a> | 3823   | NM_002261 | M-011303-00 |  |  |
| KPNB1     | <a href="#">Cytotoxic Bypass</a> | 3837   | NM_002265 | M-017523-01 |  |  |
| KRT6B     | <a href="#">Cytotoxic Bypass</a> | 3854   | NM_005555 | M-012117-00 |  |  |
| KRTAP13-2 | <a href="#">Cytotoxic Bypass</a> | 337959 | NM_181621 | M-031262-00 |  |  |
| KRTAP17-1 | <a href="#">Cytotoxic Bypass</a> | 83902  | NM_031964 | M-013521-00 |  |  |
| KRTAP21-2 | <a href="#">Cytotoxic Bypass</a> | 337978 | NM_181617 | M-018617-00 |  |  |
| LCE1B     | <a href="#">Cytotoxic Bypass</a> | 353132 | NM_178349 | M-019015-00 |  |  |
| LCE1C     | <a href="#">Cytotoxic Bypass</a> | 353133 | NM_178351 | M-019016-00 |  |  |
| LDB3      | <a href="#">Cytotoxic Bypass</a> | 11155  | NM_007078 | M-026288-00 |  |  |
| LIN7C     | <a href="#">Cytotoxic Bypass</a> | 55327  | NM_018362 | M-008473-00 |  |  |
| LOC113655 | <a href="#">Cytotoxic Bypass</a> | 113655 | NM_138431 | M-015597-00 |  |  |
| LOC120237 | <a href="#">Cytotoxic Bypass</a> | 120237 | XM_061930 | M-026866-00 |  |  |
| LOC125958 | <a href="#">Cytotoxic Bypass</a> | 125958 | XM_064879 | M-024016-00 |  |  |
| LOC127262 | <a href="#">Cytotoxic Bypass</a> | 127262 | NM_182752 | M-019381-00 |  |  |
| LOC133874 | <a href="#">Cytotoxic Bypass</a> | 133874 | XM_059672 | M-024306-00 |  |  |
| LOC143158 | <a href="#">Cytotoxic Bypass</a> | DC     | XM_084445 | M-026362-00 |  |  |
| LOC150568 | <a href="#">Cytotoxic Bypass</a> | 150568 | XM_379117 | M-027795-00 |  |  |
| LOC153364 | <a href="#">Cytotoxic Bypass</a> | 153364 | NM_203406 | M-031934-00 |  |  |
| LOC158381 | <a href="#">Cytotoxic Bypass</a> | 158381 | XM_376829 | M-029548-00 |  |  |
| LOC196541 | <a href="#">Cytotoxic Bypass</a> | 196541 | XM_116936 | M-021582-00 |  |  |
| LOC201475 | <a href="#">Cytotoxic Bypass</a> | 201475 | XM_113967 | M-023375-00 |  |  |
| LOC201484 | <a href="#">Cytotoxic Bypass</a> | DC     | XM_117100 | M-023414-00 |  |  |
| LOC203076 | <a href="#">Cytotoxic Bypass</a> | 203076 | XM_114621 | M-025873-00 |  |  |
| LOC219797 | <a href="#">Cytotoxic Bypass</a> | DC     | XM_166747 | M-026570-00 |  |  |
| LOC23117  | <a href="#">Cytotoxic Bypass</a> | 23117  | XM_290670 | M-022505-00 |  |  |
| LOC283117 | <a href="#">Cytotoxic Bypass</a> | DC     | XM_210184 | M-026887-00 |  |  |
| LOC283440 | <a href="#">Cytotoxic Bypass</a> | 283440 | XM_211040 | M-027107-00 |  |  |
| LOC283530 | <a href="#">Cytotoxic Bypass</a> | DC     | XM_211079 | M-021684-00 |  |  |
| LOC284058 | <a href="#">Cytotoxic Bypass</a> | 284058 | NM_015443 | M-031748-00 |  |  |
| LOC284207 | <a href="#">Cytotoxic Bypass</a> | 284207 | XM_209073 | M-022983-00 |  |  |
| LOC284232 | <a href="#">Cytotoxic Bypass</a> | 284232 | XM_209076 | M-023380-00 |  |  |
| LOC285647 | <a href="#">Cytotoxic Bypass</a> | 285647 | XM_209700 | M-024611-00 |  |  |
| LOC285703 | <a href="#">Cytotoxic Bypass</a> | DC     | XM_209728 | M-024412-00 |  |  |
| LOC285777 | <a href="#">Cytotoxic Bypass</a> | DC     | XM_212013 | M-024807-00 |  |  |
| LOC285908 | <a href="#">Cytotoxic Bypass</a> | 285908 | NM_181722 | M-018928-00 |  |  |
| LOC286149 | <a href="#">Cytotoxic Bypass</a> | 286149 | XM_379594 | M-029344-00 |  |  |
| LOC340221 | <a href="#">Cytotoxic Bypass</a> | 340221 | XM_291200 | M-025186-00 |  |  |
| LOC340578 | <a href="#">Cytotoxic Bypass</a> | 340578 | XM_293387 | M-024958-00 |  |  |
| LOC340900 | <a href="#">Cytotoxic Bypass</a> | 340900 | XM_291767 | M-026486-00 |  |  |
| LOC340947 | <a href="#">Cytotoxic Bypass</a> | 340947 | XM_291763 | M-026480-00 |  |  |
| LOC343854 | <a href="#">Cytotoxic Bypass</a> | DC     | XM_293225 | M-024591-00 |  |  |
| LOC347475 | <a href="#">Cytotoxic Bypass</a> | 347475 | XM_298045 | M-024964-00 |  |  |
| LOC388166 | <a href="#">Cytotoxic Bypass</a> | DC     | XM_370898 | M-030480-00 |  |  |
| LOC388420 | <a href="#">Cytotoxic Bypass</a> | DC     | XM_373749 | M-030809-00 |  |  |
| LOC389329 | <a href="#">Cytotoxic Bypass</a> | DC     | XM_374138 | M-028472-00 |  |  |
| LOC389395 | <a href="#">Cytotoxic Bypass</a> | 389395 | XM_371824 | M-028721-00 |  |  |
| LOC390007 | <a href="#">Cytotoxic Bypass</a> | 390007 | XM_372329 | M-029671-00 |  |  |
| LOC390377 | <a href="#">Cytotoxic Bypass</a> | DC     | XM_372486 | M-030242-00 |  |  |



|           |                                  |    |        |           |             |     |      |
|-----------|----------------------------------|----|--------|-----------|-------------|-----|------|
| LOC390558 | <a href="#">Cytotoxic Bypass</a> |    | 390558 | XM_372559 | M-030452-00 |     |      |
| LOC391130 | <a href="#">Cytotoxic Bypass</a> |    | 391130 | XM_372803 | M-027596-00 |     |      |
| LOC391169 | <a href="#">Cytotoxic Bypass</a> |    | 391169 | XM_372816 | M-027578-00 |     |      |
| LOC392473 | <a href="#">Cytotoxic Bypass</a> |    | 392473 | XM_373351 | M-031542-00 |     |      |
| LOC399924 | <a href="#">Cytotoxic Bypass</a> | DC |        | XM_378301 | M-029911-00 |     |      |
| LOC400004 | <a href="#">Cytotoxic Bypass</a> | DC |        | XM_378340 | M-030119-00 |     |      |
| LOC400452 | <a href="#">Cytotoxic Bypass</a> | DC |        | XM_375261 | M-030492-00 |     |      |
| LOC400743 | <a href="#">Cytotoxic Bypass</a> |    | 400743 | XM_378843 | M-027429-00 |     |      |
| LOC401037 | <a href="#">Cytotoxic Bypass</a> |    | 401037 | XM_379161 | M-027964-00 |     |      |
| LOC401384 | <a href="#">Cytotoxic Bypass</a> | DC |        | XM_379506 | M-028902-00 |     |      |
| LOC401393 | <a href="#">Cytotoxic Bypass</a> |    | 401393 | XM_376658 | M-028917-00 |     |      |
| LOC401548 | <a href="#">Cytotoxic Bypass</a> |    | 401548 | XM_376902 | M-029584-00 |     |      |
| LOC402357 | <a href="#">Cytotoxic Bypass</a> |    | 3468   | XM_378052 | M-029562-00 |     |      |
| LOC402560 | <a href="#">Cytotoxic Bypass</a> | DC |        | XM_380127 | M-031802-00 |     |      |
| LOC440683 | <a href="#">Cytotoxic Bypass</a> |    | 440683 | XM_496404 | M-032291-00 |     |      |
| LOC51149  | <a href="#">Cytotoxic Bypass</a> |    | 51149  | NM_016175 | M-021060-00 |     |      |
| LOC56926  | <a href="#">Cytotoxic Bypass</a> |    | 56926  | NM_020170 | M-010718-00 |     |      |
| LOC87769  | <a href="#">Cytotoxic Bypass</a> |    | 87769  | XM_373431 | M-030187-00 |     |      |
| LOC90120  | <a href="#">Cytotoxic Bypass</a> |    | 90120  | XM_379680 | M-029408-00 |     |      |
| LOC90139  | <a href="#">Cytotoxic Bypass</a> |    | 90139  | NM_130783 | M-015297-00 |     |      |
| LSM5      | <a href="#">Cytotoxic Bypass</a> |    | 23658  | NM_012322 | M-019555-00 |     |      |
| LU        | <a href="#">Cytotoxic Bypass</a> |    | 4059   | NM_005581 | M-010608-00 |     |      |
| LYRIC     | <a href="#">Cytotoxic Bypass</a> |    | 92140  | NM_178812 | M-018531-00 |     |      |
| MAFG      | <a href="#">Cytotoxic Bypass</a> |    | 4097   | NM_002359 | M-009109-01 |     |      |
| MAGEA8    | <a href="#">Cytotoxic Bypass</a> |    | 4107   | NM_005364 | M-017366-00 |     |      |
| MARCH3    | <a href="#">Cytotoxic Bypass</a> |    | 115123 | NM_178450 | M-007116-00 |     |      |
| MART2     | <a href="#">Cytotoxic Bypass</a> |    | 55733  | NM_018194 | M-009316-00 |     |      |
| MATN2     | <a href="#">Cytotoxic Bypass</a> |    | 4147   | NM_002380 | M-011329-00 | YES |      |
| MEGF11    | <a href="#">Cytotoxic Bypass</a> |    | 84465  | NM_032445 | M-014896-00 |     |      |
| MGC10871  | <a href="#">Cytotoxic Bypass</a> |    | 83759  | NM_031492 | M-014744-00 |     |      |
| MGC10992  | <a href="#">Cytotoxic Bypass</a> |    | 92922  | NM_033212 | M-015088-00 |     |      |
| MGC14161  | <a href="#">Cytotoxic Bypass</a> |    | 84978  | NM_032892 | M-015036-00 |     |      |
| MGC14801  | <a href="#">Cytotoxic Bypass</a> |    | 84791  | NM_032705 | M-014967-00 |     |      |
| MGC14839  | <a href="#">Cytotoxic Bypass</a> |    | 91894  | NM_080659 | M-015249-00 |     |      |
| MGC15634  | <a href="#">Cytotoxic Bypass</a> |    | 84841  | XM_378186 | M-014984-00 |     |      |
| MGC16075  | <a href="#">Cytotoxic Bypass</a> |    | 84847  | NM_032761 | M-014988-00 |     |      |
| MGC22960  | <a href="#">Cytotoxic Bypass</a> |    | 387338 | NM_199044 | M-027291-00 |     |      |
| MGC23280  | <a href="#">Cytotoxic Bypass</a> |    | 147015 | NM_144683 | M-008777-00 |     |      |
| MGC24125  | <a href="#">Cytotoxic Bypass</a> |    | 152766 | NM_173796 | M-018552-00 |     |      |
| MGC27466  | <a href="#">Cytotoxic Bypass</a> |    | 127396 | NM_152373 | M-016658-00 |     |      |
| MGC3036   | <a href="#">Cytotoxic Bypass</a> |    | 65999  | NM_023942 | M-014261-00 |     |      |
| MGC4189   | <a href="#">Cytotoxic Bypass</a> |    | 84268  | NM_032308 | M-014848-00 |     |      |
| MGC50104  | <a href="#">Cytotoxic Bypass</a> |    | 341032 | NM_198498 | M-027244-00 |     |      |
| MGC50273  | <a href="#">Cytotoxic Bypass</a> |    | 408029 | NM_214461 | M-032558-00 |     |      |
| MGC52423  | <a href="#">Cytotoxic Bypass</a> |    | 149466 | NM_182517 | M-018640-00 |     |      |
| MGC5395   | <a href="#">Cytotoxic Bypass</a> |    | 79026  | NM_024060 | M-014285-00 |     |      |
| MGC61550  | <a href="#">Cytotoxic Bypass</a> |    | 348110 | NM_182616 | M-018687-00 |     |      |
| MGC61716  | <a href="#">Cytotoxic Bypass</a> |    | 130916 | NM_182501 | M-018834-00 |     |      |
| MINA      | <a href="#">Cytotoxic Bypass</a> |    | 84864  | NM_153182 | M-016031-00 |     |      |
| MR1       | <a href="#">Cytotoxic Bypass</a> |    | 3140   | NM_001531 | M-019619-00 |     |      |
| MRPL10    | <a href="#">Cytotoxic Bypass</a> |    | 124995 | NM_145255 | M-017394-00 |     |      |
| MSH4      | <a href="#">Cytotoxic Bypass</a> |    | 4438   | NM_002440 | M-019116-00 |     | MSH4 |
| MSRA      | <a href="#">Cytotoxic Bypass</a> |    | 4482   | NM_012331 | M-012464-00 |     |      |

|         |                                  |        |           |             |     |       |
|---------|----------------------------------|--------|-----------|-------------|-----|-------|
| MTATP8  | <a href="#">Cytotoxic Bypass</a> | 4509   | NM_173703 | M-012824-00 |     |       |
| MTMR4   | <a href="#">Cytotoxic Bypass</a> | 9110   | NM_004687 | M-008040-01 |     |       |
| MTMR8   | <a href="#">Cytotoxic Bypass</a> | 55613  | NM_017677 | M-008042-01 |     |       |
| MYOZ3   | <a href="#">Cytotoxic Bypass</a> | 91977  | NM_133371 | M-018208-00 |     |       |
| NAB1    | <a href="#">Cytotoxic Bypass</a> | 4664   | NM_005966 | M-015359-00 |     |       |
| NANOS1  | <a href="#">Cytotoxic Bypass</a> | 340719 | NM_199461 | M-027290-00 |     |       |
| NARF    | <a href="#">Cytotoxic Bypass</a> | 26502  | NM_012336 | M-012465-00 | YES |       |
| NDE1    | <a href="#">Cytotoxic Bypass</a> | 54820  | NM_017668 | M-020625-00 |     |       |
| NDP52   | <a href="#">Cytotoxic Bypass</a> | 10241  | NM_005831 | M-010637-00 |     |       |
| NDUFA6  | <a href="#">Cytotoxic Bypass</a> | 4700   | NM_002490 | M-015716-00 |     |       |
| NEXN    | <a href="#">Cytotoxic Bypass</a> | 91624  | NM_144573 | M-016402-00 |     |       |
| NIPA    | <a href="#">Cytotoxic Bypass</a> | 51530  | NM_016478 | M-016879-00 |     |       |
| NIT2    | <a href="#">Cytotoxic Bypass</a> | 56954  | NM_020202 | M-017902-00 |     |       |
| NUP43   | <a href="#">Cytotoxic Bypass</a> | 348995 | NM_024647 | M-018906-00 |     |       |
| ODF3    | <a href="#">Cytotoxic Bypass</a> | 113746 | NM_053280 | M-015199-00 |     |       |
| OPRS1   | <a href="#">Cytotoxic Bypass</a> | 10280  | NM_005866 | M-017475-00 |     |       |
| OPTN    | <a href="#">Cytotoxic Bypass</a> | 10133  | NM_021980 | M-016269-00 |     |       |
| OSAP    | <a href="#">Cytotoxic Bypass</a> | 84709  | NM_032623 | M-010682-00 |     |       |
| OTOF    | <a href="#">Cytotoxic Bypass</a> | 9381   | NM_004802 | M-011942-00 |     |       |
| P29     | <a href="#">Cytotoxic Bypass</a> | 25949  | NM_015484 | M-020239-00 |     |       |
| P4HA2   | <a href="#">Cytotoxic Bypass</a> | 8974   | NM_004199 | M-006367-00 |     |       |
| PANX2   | <a href="#">Cytotoxic Bypass</a> | 56666  | NM_052839 | M-015135-00 |     |       |
| PCDH11X | <a href="#">Cytotoxic Bypass</a> | 27328  | NM_014522 | M-013619-00 |     |       |
| PCDH12  | <a href="#">Cytotoxic Bypass</a> | 51294  | NM_016580 | M-013621-00 |     |       |
| PCNT2   | <a href="#">Cytotoxic Bypass</a> | 5116   | NM_006031 | M-012172-00 |     |       |
| PEX26   | <a href="#">Cytotoxic Bypass</a> | 55670  | NM_017929 | M-019128-00 |     |       |
| PLXNA3  | <a href="#">Cytotoxic Bypass</a> | 55558  | NM_017514 | M-020933-01 |     |       |
| PLXNB1  | <a href="#">Cytotoxic Bypass</a> | 5364   | NM_002673 | M-019590-01 |     |       |
| PNPLA1  | <a href="#">Cytotoxic Bypass</a> | 285848 | NM_173676 | M-009042-00 |     |       |
| POLK    | <a href="#">Cytotoxic Bypass</a> | 51426  | NM_016218 | M-021038-00 |     | POLK  |
| POLM    | <a href="#">Cytotoxic Bypass</a> | 27434  | NM_013284 | M-010035-00 |     | POLM  |
| POLR2G  | <a href="#">Cytotoxic Bypass</a> | 5436   | NM_002696 | M-011357-00 |     |       |
| PRAM-1  | <a href="#">Cytotoxic Bypass</a> | 84106  | NM_032152 | M-018654-00 |     |       |
| PRG2    | <a href="#">Cytotoxic Bypass</a> | 5553   | NM_002728 | M-017949-00 |     |       |
| PRSS22  | <a href="#">Cytotoxic Bypass</a> | 64063  | NM_022119 | M-006013-00 |     |       |
| PSMB2   | <a href="#">Cytotoxic Bypass</a> | 5690   | NM_002794 | M-010461-00 |     |       |
| PSMD2   | <a href="#">Cytotoxic Bypass</a> | 5708   | NM_002808 | M-017212-01 |     |       |
| PTDSR   | <a href="#">Cytotoxic Bypass</a> | 23210  | NM_015167 | M-010363-01 |     |       |
| PTGFRN  | <a href="#">Cytotoxic Bypass</a> | 5738   | XM_040709 | M-010619-00 |     |       |
| PTGIS   | <a href="#">Cytotoxic Bypass</a> | 5740   | NM_000961 | M-004691-01 |     |       |
| PTOV1   | <a href="#">Cytotoxic Bypass</a> | 53635  | NM_017432 | M-005210-00 |     |       |
| PWP2H   | <a href="#">Cytotoxic Bypass</a> | 5822   | NM_005049 | M-019927-00 |     |       |
| PYCR2   | <a href="#">Cytotoxic Bypass</a> | 29920  | NM_013328 | M-016646-00 |     |       |
| PYM     | <a href="#">Cytotoxic Bypass</a> | 84305  | NM_032345 | M-014868-00 |     |       |
| RAB17   | <a href="#">Cytotoxic Bypass</a> | 64284  | NM_022449 | M-006474-00 |     |       |
| RAB1B   | <a href="#">Cytotoxic Bypass</a> | 81876  | NM_030981 | M-008958-00 |     |       |
| RAB33A  | <a href="#">Cytotoxic Bypass</a> | 9363   | NM_004794 | M-008206-00 |     |       |
| RABGGTA | <a href="#">Cytotoxic Bypass</a> | 5875   | NM_004581 | M-005097-00 |     |       |
| RAD51   | <a href="#">Cytotoxic Bypass</a> | 5888   | NM_002875 | M-003530-03 |     | RAD51 |
| RAI14   | <a href="#">Cytotoxic Bypass</a> | 26064  | NM_015577 | M-013919-00 |     |       |
| RASL11A | <a href="#">Cytotoxic Bypass</a> | 387496 | NM_206827 | M-031911-00 |     |       |
| RBBP8   | <a href="#">Cytotoxic Bypass</a> | 5932   | NM_002894 | M-011376-00 | YES | RBBP8 |
| RBPSUHL | <a href="#">Cytotoxic Bypass</a> | 11317  | NM_014276 | M-012504-00 |     |       |

|           |                                  |        |           |             |     |      |
|-----------|----------------------------------|--------|-----------|-------------|-----|------|
| RCD-8     | <a href="#">Cytotoxic Bypass</a> | 23644  | NM_014329 | M-016635-00 | YES |      |
| RCOR1     | <a href="#">Cytotoxic Bypass</a> | 23186  | NM_015156 | M-014076-00 |     |      |
| RFPL2     | <a href="#">Cytotoxic Bypass</a> | 10739  | NM_006605 | M-006935-00 |     |      |
| RGMB      | <a href="#">Cytotoxic Bypass</a> | 285704 | NM_173670 | M-018102-00 |     |      |
| RKHD2     | <a href="#">Cytotoxic Bypass</a> | 51320  | NM_016626 | M-006989-00 |     |      |
| RODH      | <a href="#">Cytotoxic Bypass</a> | 8630   | NM_003725 | M-009280-00 |     |      |
| RPA1      | <a href="#">Cytotoxic Bypass</a> | 6117   | NM_002945 | M-015749-00 | YES | RPA1 |
| RPL13     | <a href="#">Cytotoxic Bypass</a> | 6137   | NM_000977 | M-013714-00 |     |      |
| RPL39L    | <a href="#">Cytotoxic Bypass</a> | 116832 | NM_052969 | M-012971-00 |     |      |
| RPP38     | <a href="#">Cytotoxic Bypass</a> | 10557  | NM_006414 | M-019447-00 |     |      |
| S100A11   | <a href="#">Cytotoxic Bypass</a> | 6282   | NM_005620 | M-012138-00 |     |      |
| S100A15   | <a href="#">Cytotoxic Bypass</a> | 338324 | NM_176823 | M-027145-00 |     |      |
| SC5DL     | <a href="#">Cytotoxic Bypass</a> | 6309   | NM_006918 | M-009745-00 |     |      |
| SCAND2    | <a href="#">Cytotoxic Bypass</a> | 54581  | NM_022050 | M-013048-00 |     |      |
| SEC14L4   | <a href="#">Cytotoxic Bypass</a> | 284904 | NM_174977 | M-019246-00 |     |      |
| SERP1     | <a href="#">Cytotoxic Bypass</a> | 27230  | NM_014445 | M-015404-00 |     |      |
| SFTPA2    | <a href="#">Cytotoxic Bypass</a> | 6436   | NM_006926 | M-019736-00 |     |      |
| SFXN2     | <a href="#">Cytotoxic Bypass</a> | 118980 | NM_178858 | M-018547-00 |     |      |
| SGCE      | <a href="#">Cytotoxic Bypass</a> | 8910   | NM_003919 | M-012626-00 |     |      |
| SLC16A10  | <a href="#">Cytotoxic Bypass</a> | 117247 | NM_018593 | M-007403-00 |     |      |
| SLC22A18  | <a href="#">Cytotoxic Bypass</a> | 5002   | NM_002555 | M-007452-00 |     |      |
| SLC22A1LS | <a href="#">Cytotoxic Bypass</a> | 5003   | NM_007105 | M-019642-00 |     |      |
| SLC24A4   | <a href="#">Cytotoxic Bypass</a> | 123041 | NM_153646 | M-007467-00 |     |      |
| SLC26A11  | <a href="#">Cytotoxic Bypass</a> | 284129 | NM_173626 | M-007490-00 |     |      |
| SLC31A2   | <a href="#">Cytotoxic Bypass</a> | 1318   | NM_001860 | M-007532-00 |     |      |
| SLC39A2   | <a href="#">Cytotoxic Bypass</a> | 29986  | NM_014579 | M-007570-00 |     |      |
| SLC39A3   | <a href="#">Cytotoxic Bypass</a> | 29985  | NM_144564 | M-007571-00 |     |      |
| SLC39A5   | <a href="#">Cytotoxic Bypass</a> | 283375 | NM_173596 | M-007364-00 |     |      |
| SLC6A2    | <a href="#">Cytotoxic Bypass</a> | 6530   | NM_001043 | M-007602-00 |     |      |
| SLC9A3    | <a href="#">Cytotoxic Bypass</a> | 6550   | NM_004174 | M-007624-00 |     |      |
| SNX27     | <a href="#">Cytotoxic Bypass</a> | 81609  | NM_030918 | M-017346-00 |     |      |
| SOLH      | <a href="#">Cytotoxic Bypass</a> | 6650   | NM_005632 | M-006037-00 |     |      |
| SON       | <a href="#">Cytotoxic Bypass</a> | 6651   | NM_003103 | M-012983-00 |     |      |
| SP6       | <a href="#">Cytotoxic Bypass</a> | 80320  | NM_199262 | M-032231-00 |     |      |
| SPAG4L    | <a href="#">Cytotoxic Bypass</a> | 140732 | NM_080675 | M-016807-00 |     |      |
| SPAG5     | <a href="#">Cytotoxic Bypass</a> | 10615  | NM_006461 | M-006839-00 | YES |      |
| SR-A1     | <a href="#">Cytotoxic Bypass</a> | 58506  | NM_021228 | M-031985-00 |     |      |
| SSBP1     | <a href="#">Cytotoxic Bypass</a> | 6742   | NM_003143 | M-021365-00 | YES |      |
| STOML1    | <a href="#">Cytotoxic Bypass</a> | 9399   | NM_004809 | M-009360-00 |     |      |
| STXBP5L   | <a href="#">Cytotoxic Bypass</a> | 9515   | XM_045911 | M-023581-00 |     |      |
| SUGT1     | <a href="#">Cytotoxic Bypass</a> | 10910  | NM_006704 | M-012877-00 |     |      |
| SWAP70    | <a href="#">Cytotoxic Bypass</a> | 23075  | NM_015055 | M-010323-00 |     |      |
| SYTL3     | <a href="#">Cytotoxic Bypass</a> | 94120  | XM_087804 | M-004544-00 |     |      |
| TATDN1    | <a href="#">Cytotoxic Bypass</a> | 83940  | NM_032026 | M-014767-00 |     |      |
| TCP11     | <a href="#">Cytotoxic Bypass</a> | 6954   | NM_018679 | M-017977-00 |     |      |
| TDRD1     | <a href="#">Cytotoxic Bypass</a> | 56165  | NM_198795 | M-013489-00 |     |      |
| TDRD4     | <a href="#">Cytotoxic Bypass</a> | 54513  | NM_019038 | M-020495-00 |     |      |
| TJP4      | <a href="#">Cytotoxic Bypass</a> | 93643  | NM_080604 | M-015236-00 |     |      |
| TKTL1     | <a href="#">Cytotoxic Bypass</a> | 8277   | NM_012253 | M-004736-00 |     |      |
| TLP       | <a href="#">Cytotoxic Bypass</a> | 401262 | NM_206922 | M-031969-00 |     |      |
| TNFRSF1B  | <a href="#">Cytotoxic Bypass</a> | 7133   | NM_001066 | M-003934-00 |     |      |
| TOLLIP    | <a href="#">Cytotoxic Bypass</a> | 54472  | NM_019009 | M-016930-00 |     |      |
| TRHR      | <a href="#">Cytotoxic Bypass</a> | 7201   | NM_003301 | M-005747-00 |     |      |

|          |                                  |        |             |             |     |      |
|----------|----------------------------------|--------|-------------|-------------|-----|------|
| TSCOT    | <a href="#">Cytotoxic Bypass</a> | 57864  | NM_033051   | M-018639-00 |     |      |
| TSPY2    | <a href="#">Cytotoxic Bypass</a> | 64591  | NM_022573   | M-014173-00 |     |      |
| TSPYL1   | <a href="#">Cytotoxic Bypass</a> | 7259   | XM_371844   | M-028592-00 |     |      |
| TSTA3    | <a href="#">Cytotoxic Bypass</a> | 7264   | NM_003313   | M-011412-00 |     |      |
| TTC17    | <a href="#">Cytotoxic Bypass</a> | 55761  | NM_018259   | M-015541-00 |     |      |
| TUBGCP2  | <a href="#">Cytotoxic Bypass</a> | 10844  | NM_006659   | M-020208-00 |     |      |
| TXNDC6   | <a href="#">Cytotoxic Bypass</a> | 347736 | NM_178130   | M-006790-00 |     |      |
| UCN2     | <a href="#">Cytotoxic Bypass</a> | 90226  | NM_033199   | M-018173-00 |     |      |
| UNQ2754  | <a href="#">Cytotoxic Bypass</a> | 389610 | NM_207411   | M-032089-00 |     |      |
| USP39    | <a href="#">Cytotoxic Bypass</a> | 10713  | NM_006590   | M-006087-00 |     |      |
| USP43    | <a href="#">Cytotoxic Bypass</a> | 124739 | XM_371015   | M-023019-00 |     |      |
| VPS24    | <a href="#">Cytotoxic Bypass</a> | 51652  | NM_016079   | M-004696-00 |     |      |
| VPS52    | <a href="#">Cytotoxic Bypass</a> | 6293   | NM_022553   | M-011806-00 |     |      |
| WDHD1    | <a href="#">Cytotoxic Bypass</a> | 11169  | NM_007086   | M-019780-00 | YES |      |
| WDR20    | <a href="#">Cytotoxic Bypass</a> | 91833  | NM_144574   | M-021318-00 |     |      |
| WDR37    | <a href="#">Cytotoxic Bypass</a> | 22884  | NM_014023   | M-020390-00 |     |      |
| WEE1     | <a href="#">Cytotoxic Bypass</a> | 7465   | NM_003390   | M-005050-00 |     | WEE1 |
| WFDC13   | <a href="#">Cytotoxic Bypass</a> | 164237 | NM_172005   | M-017589-00 |     |      |
| XAB2     | <a href="#">Cytotoxic Bypass</a> | 56949  | NM_020196   | M-004914-00 |     | XAB2 |
| ZDHC16   | <a href="#">Cytotoxic Bypass</a> | 84287  | NM_032327   | M-021403-00 |     |      |
| ZMYND12  | <a href="#">Cytotoxic Bypass</a> | 84217  | NM_032257   | M-015735-00 |     |      |
| ZNF226   | <a href="#">Cytotoxic Bypass</a> | 7769   | NM_015919   | M-019147-00 |     |      |
| ZNF271   | <a href="#">Cytotoxic Bypass</a> | 10778  | NM_006629   | M-015671-00 |     |      |
| ZNF462   | <a href="#">Cytotoxic Bypass</a> | 58499  | NM_021224   | M-018036-00 | YES |      |
| ZNF483   | <a href="#">Cytotoxic Bypass</a> | 158399 | XM_088567   | M-026189-00 |     |      |
| ZNF511   | <a href="#">Cytotoxic Bypass</a> | 118472 | NM_145806   | M-018086-00 |     |      |
| ZNF551   | <a href="#">Cytotoxic Bypass</a> | 90233  | NM_138347   | M-015515-00 |     |      |
| ZNF568   | <a href="#">Cytotoxic Bypass</a> | 374900 | NM_198539   | M-027357-00 |     |      |
| AANAT    | <a href="#">Cytotoxic</a>        | 15     | NM_001088   | M-010380-00 |     |      |
| AATF     | <a href="#">Cytotoxic</a>        | 26574  | NM_012138   | M-004373-01 |     |      |
| ABCA2    | <a href="#">Cytotoxic</a>        | 20     | NM_001606   | M-009699-00 |     |      |
| ABCB1    | <a href="#">Cytotoxic</a>        | 5243   | NM_000927   | M-003868-02 |     |      |
| ABCD3    | <a href="#">Cytotoxic</a>        | 5825   | NM_002858   | M-009909-00 |     |      |
| ABCE1    | <a href="#">Cytotoxic</a>        | 6059   | NM_002940   | M-008702-00 |     |      |
| ACADL    | <a href="#">Cytotoxic</a>        | 33     | NM_001608   | M-009851-00 |     |      |
| ACO1     | <a href="#">Cytotoxic</a>        | 48     | NM_002197   | M-010037-00 |     |      |
| ACTBL1   | <a href="#">Cytotoxic</a>        | 23784  | NM_00100405 | M-032372-00 |     |      |
| ACTRT1   | <a href="#">Cytotoxic</a>        | 139741 | NM_138289   | M-015326-00 |     |      |
| AD7C-NTP | <a href="#">Cytotoxic</a>        | 27308  | NM_014486   | M-020221-00 |     |      |
| ADAM29   | <a href="#">Cytotoxic</a>        | 11086  | NM_014269   | M-008808-00 |     |      |
| AF15Q14  | <a href="#">Cytotoxic</a>        | 57082  | NM_020380   | M-015673-00 |     |      |
| AIM1L    | <a href="#">Cytotoxic</a>        | 55057  | NM_017977   | M-021468-00 |     |      |
| AKAP28   | <a href="#">Cytotoxic</a>        | 158798 | NM_178813   | M-017696-00 |     |      |
| AKR1A1   | <a href="#">Cytotoxic</a>        | 10327  | NM_006066   | M-005087-03 |     |      |
| AKR1B1   | <a href="#">Cytotoxic</a>        | 231    | NM_001628   | M-004036-00 |     |      |
| AKR7A3   | <a href="#">Cytotoxic</a>        | 22977  | NM_012067   | M-008655-01 |     |      |
| ALDOA    | <a href="#">Cytotoxic</a>        | 226    | NM_000034   | M-010376-01 |     |      |
| AMSH-LP  | <a href="#">Cytotoxic</a>        | 57559  | NM_020799   | M-005783-01 |     |      |
| ANAPC2   | <a href="#">Cytotoxic</a>        | 29882  | NM_013366   | M-003200-02 |     |      |
| ANKRD20A | <a href="#">Cytotoxic</a>        | 84210  | NM_032250   | M-014816-00 |     |      |
| ANKRD30A | <a href="#">Cytotoxic</a>        | 91074  | NM_052997   | M-008466-00 |     |      |
| ANKRD9   | <a href="#">Cytotoxic</a>        | 122416 | NM_152326   | M-015551-00 |     |      |
| ANKS1    | <a href="#">Cytotoxic</a>        | 23294  | NM_015245   | M-025085-00 |     |      |

|           |           |        |           |             |     |  |
|-----------|-----------|--------|-----------|-------------|-----|--|
| AP4B1     | Cytotoxic | 10717  | NM_006594 | M-020158-00 |     |  |
| APOA2     | Cytotoxic | 336    | NM_001643 | M-011572-00 |     |  |
| APOA5     | Cytotoxic | 116519 | NM_052968 | M-012970-00 |     |  |
| APR-2     | Cytotoxic | 23591  | NM_014318 | M-004376-00 |     |  |
| AQR       | Cytotoxic | 9716   | NM_014691 | M-022214-00 |     |  |
| ARCN1     | Cytotoxic | 372    | NM_001655 | M-013063-00 |     |  |
| ARFIP1    | Cytotoxic | 27236  | NM_014447 | M-020256-00 |     |  |
| ARHGAP17  | Cytotoxic | 55114  | NM_018054 | M-008335-00 |     |  |
| ARHGAP20  | Cytotoxic | 57569  | NM_020809 | M-026514-00 |     |  |
| ASAH3     | Cytotoxic | 125981 | NM_133492 | M-010298-00 |     |  |
| ASB16     | Cytotoxic | 92591  | NM_080863 | M-013061-00 |     |  |
| ASGR1     | Cytotoxic | 432    | NM_001671 | M-013268-00 |     |  |
| ATF2      | Cytotoxic | 1386   | NM_001880 | M-009871-00 |     |  |
| AURKB     | Cytotoxic | 9212   | NM_004217 | M-003326-02 |     |  |
| AYP1      | Cytotoxic | 84153  | NM_032193 | M-014801-00 |     |  |
| AZI1      | Cytotoxic | 22994  | XM_045581 | M-023335-00 | YES |  |
| B3GAT1    | Cytotoxic | 27087  | NM_018644 | M-012896-00 |     |  |
| B7H3      | Cytotoxic | 80381  | NM_025240 | M-007813-00 |     |  |
| BACE1     | Cytotoxic | 23621  | NM_012104 | M-003747-00 |     |  |
| BANP      | Cytotoxic | 54971  | NM_017869 | M-013093-00 |     |  |
| BC-2      | Cytotoxic | 27243  | NM_014453 | M-020247-00 |     |  |
| BCL2L1    | Cytotoxic | 598    | NM_138578 | M-003458-00 |     |  |
| BCLP      | Cytotoxic | 113452 | NM_033504 | M-015127-00 |     |  |
| BIG1      | Cytotoxic | 10565  | NM_006421 | M-012207-00 |     |  |
| BJ-TSA-9  | Cytotoxic | 84985  | NM_032899 | M-015040-00 |     |  |
| BMF       | Cytotoxic | 90427  | NM_033503 | M-004393-01 |     |  |
| BRD8      | Cytotoxic | 10902  | NM_006696 | M-006377-00 |     |  |
| BRDG1     | Cytotoxic | 26228  | NM_012108 | M-012411-00 |     |  |
| BRUNOL5   | Cytotoxic | 60680  | NM_021938 | M-016648-00 |     |  |
| BRUNOL6   | Cytotoxic | 60677  | NM_052840 | M-015854-00 |     |  |
| BTBD12    | Cytotoxic | 84464  | NM_032444 | M-014895-00 |     |  |
| BTBD14A   | Cytotoxic | 138151 | NM_144653 | M-015957-00 |     |  |
| BTN2A1    | Cytotoxic | 11120  | NM_007049 | M-012331-00 |     |  |
| BTN3A3    | Cytotoxic | 10384  | NM_006994 | M-021359-00 |     |  |
| BUCS1     | Cytotoxic | 116285 | NM_052956 | M-004896-00 |     |  |
| C10ORF13  | Cytotoxic | 143282 | NM_152429 | M-018330-00 |     |  |
| C10ORF39  | Cytotoxic | 282973 | NM_194303 | M-019299-00 |     |  |
| C10ORF68  | Cytotoxic | 79741  | NM_024688 | M-014413-00 |     |  |
| C10ORF84  | Cytotoxic | 63877  | NM_022063 | M-013924-00 |     |  |
| C10ORF87  | Cytotoxic | 118663 | NM_144587 | M-016301-00 |     |  |
| C11ORF4   | Cytotoxic | 56834  | NM_020155 | M-005439-00 |     |  |
| C12ORF10  | Cytotoxic | 60314  | NM_021640 | M-013747-00 |     |  |
| C13ORF12  | Cytotoxic | 51371  | NM_015932 | M-016844-00 |     |  |
| C14ORF111 | Cytotoxic | 51077  | NM_015962 | M-020976-00 |     |  |
| C14ORF129 | Cytotoxic | 51527  | NM_016472 | M-020252-00 |     |  |
| C14ORF143 | Cytotoxic | 90141  | NM_145231 | M-015819-00 |     |  |
| C14ORF152 | Cytotoxic | 90050  | NM_138344 | M-018683-00 |     |  |
| C14ORF46  | Cytotoxic | 91750  | XM_370767 | M-030308-00 |     |  |
| C14ORF8   | Cytotoxic | 122664 | NM_173846 | M-017754-00 |     |  |
| C18ORF37  | Cytotoxic | 125476 | NM_194281 | M-019327-00 |     |  |
| C19ORF23  | Cytotoxic | 148046 | NM_152480 | M-016206-00 |     |  |
| C1ORF10   | Cytotoxic | 49860  | NM_016190 | M-010574-00 |     |  |
| C1ORF37   | Cytotoxic | 92703  | NM_138391 | M-018685-00 |     |  |

|           |           |        |           |             |     |  |
|-----------|-----------|--------|-----------|-------------|-----|--|
| C1ORF6    | Cytotoxic | 56893  | NM_020131 | M-021178-00 | YES |  |
| C1QA      | Cytotoxic | 712    | NM_015991 | M-013136-00 |     |  |
| C1QTNF2   | Cytotoxic | 114898 | NM_031908 | M-017146-00 |     |  |
| C20ORF114 | Cytotoxic | 92747  | NM_033197 | M-010095-00 |     |  |
| C20ORF14  | Cytotoxic | 24148  | NM_012469 | M-012821-00 |     |  |
| C20ORF178 | Cytotoxic | 128866 | NM_176812 | M-018075-00 |     |  |
| C20ORF18  | Cytotoxic | 10616  | NM_006462 | M-006932-00 |     |  |
| C20ORF19  | Cytotoxic | 55857  | NM_018474 | M-017957-00 |     |  |
| C20ORF59  | Cytotoxic | 63910  | NM_022082 | M-017820-00 |     |  |
| C21ORF125 | Cytotoxic | 284836 | NM_194309 | M-019297-00 |     |  |
| C21ORF18  | Cytotoxic | 54093  | NM_017438 | M-006998-00 |     |  |
| C21ORF81  | Cytotoxic | 114035 | NM_153750 | M-016651-00 |     |  |
| C21ORF84  | Cytotoxic | 114038 | NM_153752 | M-016161-00 |     |  |
| C21ORF90  | Cytotoxic | 114043 | NM_153204 | M-016405-00 |     |  |
| C22ORF18  | Cytotoxic | 79019  | NM_024053 | M-014279-00 |     |  |
| C22ORF23  | Cytotoxic | 84645  | NM_032561 | M-016823-00 |     |  |
| C2ORF26   | Cytotoxic | 65124  | NM_023016 | M-014241-00 |     |  |
| C3ORF10   | Cytotoxic | 55845  | NM_018462 | M-017711-00 |     |  |
| C4ORF9    | Cytotoxic | 8602   | XM_035572 | M-024157-00 |     |  |
| C5ORF13   | Cytotoxic | 9315   | NM_004772 | M-019848-00 |     |  |
| C6ORF11   | Cytotoxic | 9277   | NM_005452 | M-009242-00 |     |  |
| C6ORF110  | Cytotoxic | 55362  | XM_371822 | M-025105-00 |     |  |
| C6ORF142  | Cytotoxic | 90523  | NM_138569 | M-015915-00 |     |  |
| C6ORF150  | Cytotoxic | 115004 | NM_138441 | M-015607-00 |     |  |
| C6ORF182  | Cytotoxic | 285753 | NM_173830 | M-018100-00 |     |  |
| C6ORF31   | Cytotoxic | 80863  | NM_030651 | M-016655-00 |     |  |
| C6ORF72   | Cytotoxic | 116254 | NM_138785 | M-016569-00 |     |  |
| C6ORF93   | Cytotoxic | 84946  | NM_032860 | M-016354-00 |     |  |
| C7ORF19   | Cytotoxic | 80228  | NM_032831 | M-015012-00 |     |  |
| C7ORF3    | Cytotoxic | 64434  | NM_138400 | M-025229-00 |     |  |
| C8ORF17   | Cytotoxic | 56988  | NM_020237 | M-020728-00 |     |  |
| C9ORF100S | Cytotoxic | 158293 | NM_198841 | M-027289-00 |     |  |
| C9ORF127  | Cytotoxic | 51754  | NM_016446 | M-017716-00 |     |  |
| C9ORF23   | Cytotoxic | 138716 | NM_148178 | M-017493-00 |     |  |
| C9ORF52   | Cytotoxic | 158219 | NM_152574 | M-016769-00 |     |  |
| C9ORF64   | Cytotoxic | 84267  | NM_032307 | M-018609-00 |     |  |
| C9ORF89   | Cytotoxic | 84270  | NM_032310 | M-016972-00 | YES |  |
| CACNA1A   | Cytotoxic | 773    | NM_000068 | M-006121-01 |     |  |
| CADPS2    | Cytotoxic | 93664  | NM_017954 | M-018078-00 | YES |  |
| CARD11    | Cytotoxic | 84433  | NM_032415 | M-004219-00 |     |  |
| CASC1     | Cytotoxic | 55259  | NM_018272 | M-027150-00 |     |  |
| CASP8AP2  | Cytotoxic | 9994   | NM_012115 | M-012413-00 | YES |  |
| CCDC2     | Cytotoxic | 80173  | NM_025103 | M-014586-00 |     |  |
| CCDC9     | Cytotoxic | 26093  | NM_015603 | M-020279-00 |     |  |
| CCL17     | Cytotoxic | 6361   | NM_002987 | M-007828-01 |     |  |
| CCNE1     | Cytotoxic | 898    | NM_001238 | M-003213-02 | YES |  |
| CCNK      | Cytotoxic | 8812   | NM_003858 | M-029590-00 |     |  |
| CD24      | Cytotoxic | 934    | NM_013230 | M-020689-00 |     |  |
| CD8A      | Cytotoxic | 925    | NM_001768 | M-017568-00 |     |  |
| CDC40     | Cytotoxic | 51362  | NM_015891 | M-013213-00 |     |  |
| CDC6      | Cytotoxic | 990    | NM_001254 | M-003233-02 |     |  |
| CDCA5     | Cytotoxic | 113130 | NM_080668 | M-015256-00 |     |  |
| CDCA8     | Cytotoxic | 55143  | NM_018101 | M-021163-00 |     |  |

|          |           |        |           |             |     |        |
|----------|-----------|--------|-----------|-------------|-----|--------|
| CDY      | Cytotoxic | 203611 | XM_016548 | M-025053-00 |     |        |
| CDY1     | Cytotoxic | 9085   | NM_004680 | M-008916-00 |     |        |
| CEBPD    | Cytotoxic | 1052   | NM_005195 | M-010453-00 |     |        |
| CECR6    | Cytotoxic | 27439  | NM_031890 | M-014747-00 |     |        |
| CENPE    | Cytotoxic | 1062   | NM_001813 | M-003252-01 |     |        |
| CENTG1   | Cytotoxic | 116986 | NM_014770 | M-021010-00 |     |        |
| CGI-04   | Cytotoxic | 51067  | NM_015936 | M-020962-00 |     |        |
| CGI-07   | Cytotoxic | 51068  | NM_015938 | M-017172-00 |     |        |
| CGI-48   | Cytotoxic | 51096  | NM_016001 | M-020991-00 |     |        |
| CHAF1A   | Cytotoxic | 10036  | NM_005483 | M-019938-01 | YES | CHAF1A |
| CHRDL1   | Cytotoxic | 91851  | NM_145234 | M-015779-00 |     |        |
| CH-TOG   | Cytotoxic | 9793   | NM_014756 | M-006847-00 |     |        |
| CKLFSF1  | Cytotoxic | 113540 | NM_052999 | M-010750-00 |     |        |
| CLDN23   | Cytotoxic | 137075 | NM_194284 | M-019324-00 |     |        |
| CLECSF6  | Cytotoxic | 50856  | NM_016184 | M-021372-00 |     |        |
| CMAS     | Cytotoxic | 55907  | NM_018686 | M-009780-00 |     |        |
| CMRF-35H | Cytotoxic | 11314  | NM_007261 | M-012778-00 |     |        |
| CNIH     | Cytotoxic | 10175  | NM_005776 | M-019989-00 |     |        |
| CNKSR1   | Cytotoxic | 10256  | NM_006314 | M-012217-00 |     |        |
| CNTN5    | Cytotoxic | 53942  | NM_014361 | M-007858-00 |     |        |
| COASY    | Cytotoxic | 80347  | NM_025233 | M-006751-00 |     |        |
| COG5     | Cytotoxic | 10466  | NM_006348 | M-019123-00 |     |        |
| COL9A3   | Cytotoxic | 1299   | NM_001853 | M-011624-00 |     |        |
| COMMD9   | Cytotoxic | 29099  | NM_014186 | M-020724-00 |     |        |
| COMT     | Cytotoxic | 1312   | NM_000754 | M-009520-00 |     |        |
| COPA     | Cytotoxic | 1314   | NM_004371 | M-011835-00 |     |        |
| COPB     | Cytotoxic | 1315   | NM_016451 | M-017940-00 |     |        |
| COPB2    | Cytotoxic | 9276   | NM_004766 | M-019847-01 |     |        |
| COPE     | Cytotoxic | 11316  | NM_007263 | M-017632-00 |     |        |
| COPG     | Cytotoxic | 22820  | NM_016128 | M-019138-00 |     |        |
| COPZ1    | Cytotoxic | 22818  | NM_016057 | M-020293-00 | YES |        |
| COPZ2    | Cytotoxic | 51226  | NM_016429 | M-021116-00 |     |        |
| COQ3     | Cytotoxic | 51805  | NM_017421 | M-010155-00 |     |        |
| CPLX1    | Cytotoxic | 10815  | NM_006651 | M-013031-00 |     |        |
| CPSF5    | Cytotoxic | 11051  | NM_007006 | M-012335-00 |     |        |
| CREB3L2  | Cytotoxic | 64764  | NM_194071 | M-019357-00 |     |        |
| CRMP1    | Cytotoxic | 1400   | NM_001313 | M-009393-00 |     |        |
| CRNKL1   | Cytotoxic | 51340  | NM_016652 | M-019013-00 |     |        |
| CRSP7    | Cytotoxic | 9441   | NM_004831 | M-011948-01 |     |        |
| CRSP9    | Cytotoxic | 9443   | NM_004270 | M-017313-00 |     |        |
| CSN1S2A  | Cytotoxic | 286828 | XM_379270 | M-024229-00 |     |        |
| CSPG3    | Cytotoxic | 1463   | NM_004386 | M-019794-00 |     |        |
| CSPG6    | Cytotoxic | 9126   | NM_005445 | M-006834-00 | YES |        |
| CST1     | Cytotoxic | 1469   | NM_001898 | M-017398-00 |     |        |
| CSTF2T   | Cytotoxic | 23283  | NM_015235 | M-021449-00 | YES |        |
| CUL7     | Cytotoxic | 9820   | NM_014780 | M-017673-00 |     |        |
| CXORF2   | Cytotoxic | 1527   | NM_001586 | M-020184-00 |     |        |
| CXXC4    | Cytotoxic | 80319  | NM_025212 | M-008812-00 |     |        |
| CYP2S1   | Cytotoxic | 29785  | NM_030622 | M-008783-00 |     |        |
| CYP39A1  | Cytotoxic | 51302  | NM_016593 | M-008432-00 |     |        |
| D4ST1    | Cytotoxic | 113189 | NM_130468 | M-008821-00 |     |        |
| DAB2IP   | Cytotoxic | 153090 | NM_032552 | M-008249-00 |     |        |
| DDX1     | Cytotoxic | 1653   | NM_004939 | M-011993-00 |     |        |

|             |           |        |           |             |     |  |
|-------------|-----------|--------|-----------|-------------|-----|--|
| DDX19       | Cytotoxic | 11269  | NM_007242 | M-013471-00 |     |  |
| DDX42       | Cytotoxic | 11325  | NM_007372 | M-012393-00 |     |  |
| DDX48       | Cytotoxic | 9775   | NM_014740 | M-020762-00 |     |  |
| DDX49       | Cytotoxic | 54555  | NM_019070 | M-017975-00 |     |  |
| DEFB103A    | Cytotoxic | 55894  | NM_018661 | M-012998-00 |     |  |
| DEFB126     | Cytotoxic | 81623  | NM_030931 | M-019046-00 |     |  |
| DEFB127     | Cytotoxic | 140850 | NM_139074 | M-017258-00 |     |  |
| DHX29       | Cytotoxic | 54505  | NM_019030 | M-013759-00 |     |  |
| DJ159A19.3  | Cytotoxic | 27245  | XM_372774 | M-027522-00 | YES |  |
| DJ222E13.2  | Cytotoxic | 91695  | NM_170698 | M-016847-00 |     |  |
| DKFZP434B12 | Cytotoxic | 91156  | NM_178275 | M-018250-00 |     |  |
| DKFZP434K13 | Cytotoxic | 349338 | NM_182905 | M-022178-00 |     |  |
| DKFZP434K14 | Cytotoxic | 84081  | NM_032141 | M-014790-00 |     |  |
| DKFZP434M03 | Cytotoxic | 55592  | NM_017600 | M-013822-00 |     |  |
| DKFZP434O04 | Cytotoxic | 26083  | NM_015594 | M-020274-00 |     |  |
| DKFZP434P03 | Cytotoxic | 84074  | NM_032134 | M-014787-00 |     |  |
| DKFZP564B14 | Cytotoxic | 26071  | NM_015582 | M-020268-00 |     |  |
| DKFZP564D16 | Cytotoxic | 26115  | XM_371074 | M-030921-00 |     |  |
| DKFZP564F05 | Cytotoxic | 25940  | NM_015475 | M-022655-00 |     |  |
| DKFZP566A15 | Cytotoxic | 81553  | NM_030797 | M-014656-00 |     |  |
| DKFZP566D13 | Cytotoxic | 81573  | NM_030816 | M-014663-00 |     |  |
| DKFZP586A05 | Cytotoxic | 25840  | NM_014033 | M-013994-00 |     |  |
| DKFZP586M18 | Cytotoxic | 137964 | NM_178819 | M-010300-00 |     |  |
| DKFZP686P02 | Cytotoxic | 285190 | NM_182588 | M-018854-00 |     |  |
| DKFZP762I13 | Cytotoxic | 136051 | NM_152411 | M-007131-00 |     |  |
| DKK3        | Cytotoxic | 27122  | NM_013253 | M-018352-00 |     |  |
| DKK4        | Cytotoxic | 27121  | NM_014420 | M-020520-00 |     |  |
| DNAJC6      | Cytotoxic | 9829   | NM_014787 | M-009885-00 |     |  |
| DNER        | Cytotoxic | 92737  | NM_139072 | M-018708-00 |     |  |
| DOCK5       | Cytotoxic | 80005  | NM_024940 | M-018931-00 |     |  |
| DOCK9       | Cytotoxic | 23348  | NM_015296 | M-014040-00 |     |  |
| DOM3Z       | Cytotoxic | 1797   | NM_005510 | M-005004-00 |     |  |
| DPYSL2      | Cytotoxic | 1808   | NM_001386 | M-009519-00 |     |  |
| DSCR1L1     | Cytotoxic | 10231  | NM_005822 | M-020054-00 |     |  |
| DT1P1A10    | Cytotoxic | 90121  | NM_058163 | M-015211-00 |     |  |
| DTR         | Cytotoxic | 1839   | NM_001945 | M-019624-00 |     |  |
| DUFD1       | Cytotoxic | 113115 | NM_138419 | M-015495-00 |     |  |
| DULLARD     | Cytotoxic | 23399  | NM_015343 | M-017869-00 |     |  |
| EBNA1BP2    | Cytotoxic | 10969  | NM_006824 | M-019834-00 |     |  |
| ECHDC1      | Cytotoxic | 55862  | NM_018479 | M-009522-00 |     |  |
| EFA6R       | Cytotoxic | 23362  | NM_206909 | M-014030-00 |     |  |
| EFG1        | Cytotoxic | 85476  | NM_024996 | M-013685-00 |     |  |
| EFHD2       | Cytotoxic | 79180  | NM_024329 | M-016335-00 |     |  |
| EFNB1       | Cytotoxic | 1947   | NM_004429 | M-003658-01 |     |  |
| EGFL3       | Cytotoxic | 1953   | XM_031401 | M-021856-00 |     |  |
| EGLN2       | Cytotoxic | 112398 | NM_053046 | M-004277-00 |     |  |
| EHD1        | Cytotoxic | 10938  | NM_006795 | M-019022-00 |     |  |
| EI24        | Cytotoxic | 9538   | NM_004879 | M-019879-00 |     |  |
| EIF1AX      | Cytotoxic | 1964   | NM_001412 | M-011262-00 |     |  |
| EIF2B2      | Cytotoxic | 8892   | NM_014239 | M-020653-00 |     |  |
| EIF2S1      | Cytotoxic | 1965   | NM_004094 | M-015389-00 |     |  |
| EIF2S2      | Cytotoxic | 8894   | NM_003908 | M-011549-00 |     |  |
| EIF2S3      | Cytotoxic | 1968   | NM_001415 | M-017045-00 |     |  |



|          |           |        |           |             |     |       |
|----------|-----------|--------|-----------|-------------|-----|-------|
| EIF3S10  | Cytotoxic | 8661   | NM_003750 | M-019534-00 |     |       |
| EIF3S2   | Cytotoxic | 8668   | NM_003757 | M-019531-00 |     |       |
| EIF3S4   | Cytotoxic | 8666   | NM_003755 | M-019533-00 |     |       |
| EIF3S6   | Cytotoxic | 3646   | NM_001568 | M-010518-00 |     |       |
| EIF3S8   | Cytotoxic | 8663   | NM_003752 | M-009036-00 |     |       |
| EIF3S9   | Cytotoxic | 8662   | NM_003751 | M-019196-00 |     |       |
| EIF4A1   | Cytotoxic | 1973   | NM_001416 | M-020178-00 |     |       |
| EIF4G1   | Cytotoxic | 1981   | NM_004953 | M-019474-00 |     |       |
| ELA1     | Cytotoxic | 1990   | NM_001971 | M-005860-00 |     |       |
| ELMO1    | Cytotoxic | 9844   | NM_014800 | M-012851-00 |     |       |
| EMILIN3  | Cytotoxic | 90187  | NM_052846 | M-024190-00 |     |       |
| ENTH     | Cytotoxic | 9685   | NM_014666 | M-021406-00 |     |       |
| EPHA10   | Cytotoxic | 284656 | NM_173641 | M-005325-00 |     |       |
| ERAF     | Cytotoxic | 51327  | NM_016633 | M-020729-00 |     |       |
| ERAF     | Cytotoxic | 51327  | NM_016633 | M-020729-00 |     |       |
| ERBP     | Cytotoxic | 30836  | NM_014597 | M-020513-00 |     |       |
| ESPL1    | Cytotoxic | 9700   | NM_012291 | M-004104-00 |     |       |
| ETV3     | Cytotoxic | 2117   | NM_005240 | M-010509-00 |     |       |
| ETV6     | Cytotoxic | 2120   | NM_001987 | M-010510-01 |     |       |
| EXOSC8   | Cytotoxic | 11340  | NM_181503 | M-012782-00 |     |       |
| FADS3    | Cytotoxic | 3995   | NM_021727 | M-008483-00 |     |       |
| FAM36A   | Cytotoxic | 116228 | NM_198076 | M-021429-00 |     |       |
| FANCC    | Cytotoxic | 2176   | NM_000136 | M-011033-00 |     | FANCC |
| FAPP2    | Cytotoxic | 84725  | NM_032639 | M-004320-01 |     |       |
| FAT2     | Cytotoxic | 2196   | NM_001447 | M-011270-00 |     |       |
| FATE     | Cytotoxic | 89885  | NM_033085 | M-015068-00 |     |       |
| FAU      | Cytotoxic | 2197   | NM_001997 | M-013149-00 |     |       |
| FBXO17   | Cytotoxic | 115290 | NM_024907 | M-013128-00 |     |       |
| FBXO44   | Cytotoxic | 93611  | NM_033182 | M-019201-00 |     |       |
| FBXW10   | Cytotoxic | 10517  | NM_031456 | M-014733-00 |     |       |
| FCGR2C   | Cytotoxic | 9103   | NM_201563 | M-027340-00 |     |       |
| FHR5     | Cytotoxic | 81494  | NM_030787 | M-007907-00 |     |       |
| FIBCD1   | Cytotoxic | 84929  | NM_032843 | M-007908-00 |     |       |
| FKSG42   | Cytotoxic | 83956  | NM_032032 | M-006842-00 |     |       |
| FKSG43   | Cytotoxic | 83957  | NM_032033 | M-014771-00 |     |       |
| F-LANA   | Cytotoxic | 51009  | NM_016041 | M-010576-00 |     |       |
| FLJ10157 | Cytotoxic | 55083  | XM_371354 | M-022129-00 |     |       |
| FLJ10199 | Cytotoxic | 55092  | NM_018022 | M-021099-00 |     |       |
| FLJ10379 | Cytotoxic | 55133  | NM_018079 | M-018144-00 |     |       |
| FLJ10460 | Cytotoxic | 55142  | NM_018097 | M-021161-00 |     |       |
| FLJ10565 | Cytotoxic | 55722  | NM_018140 | M-020549-00 |     |       |
| FLJ10618 | Cytotoxic | 55186  | NM_018155 | M-007327-00 |     |       |
| FLJ10652 | Cytotoxic | 55196  | NM_018169 | M-020502-00 |     |       |
| FLJ10748 | Cytotoxic | 55220  | NM_018203 | M-020914-00 |     |       |
| FLJ10774 | Cytotoxic | 55226  | NM_024662 | M-014402-00 |     |       |
| FLJ11126 | Cytotoxic | 55308  | NM_018332 | M-015868-00 |     |       |
| FLJ11196 | Cytotoxic | 55323  | NM_197958 | M-021333-00 |     |       |
| FLJ11342 | Cytotoxic | 55347  | NM_018394 | M-020469-00 |     |       |
| FLJ11383 | Cytotoxic | 80003  | NM_014801 | M-019079-00 |     |       |
| FLJ11749 | Cytotoxic | 79643  | NM_024591 | M-005060-00 |     |       |
| FLJ11806 | Cytotoxic | 79882  | NM_024824 | M-014468-00 | YES |       |
| FLJ12584 | Cytotoxic | 80210  | NM_025139 | M-018047-00 |     |       |
| FLJ12595 | Cytotoxic | 80060  | NM_024994 | M-014541-00 |     |       |

|          |           |        |           |             |     |  |
|----------|-----------|--------|-----------|-------------|-----|--|
| FLJ12666 | Cytotoxic | 79647  | NM_024595 | M-014381-00 |     |  |
| FLJ12747 | Cytotoxic | 84133  | XM_290972 | M-010747-00 |     |  |
| FLJ13150 | Cytotoxic | 79871  | NM_024813 | M-014461-00 |     |  |
| FLJ13215 | Cytotoxic | 80071  | NM_025004 | M-014545-00 |     |  |
| FLJ13273 | Cytotoxic | 79807  | NM_024751 | M-014433-00 |     |  |
| FLJ13291 | Cytotoxic | 84138  | NM_032178 | M-014798-00 |     |  |
| FLJ13646 | Cytotoxic | 79635  | NM_024584 | M-014377-00 |     |  |
| FLJ13725 | Cytotoxic | 79567  | NM_024519 | M-014354-00 |     |  |
| FLJ14154 | Cytotoxic | 79903  | NM_024845 | M-014479-00 |     |  |
| FLJ14299 | Cytotoxic | 80139  | NM_025069 | M-014572-00 |     |  |
| FLJ14346 | Cytotoxic | 80097  | NM_025029 | M-014555-00 |     |  |
| FLJ14397 | Cytotoxic | 84865  | NM_032779 | M-018182-00 |     |  |
| FLJ14451 | Cytotoxic | 84872  | NM_032786 | M-014995-00 |     |  |
| FLJ14494 | Cytotoxic | 84881  | NM_032795 | M-015000-00 |     |  |
| FLJ14768 | Cytotoxic | 84922  | NM_032836 | M-015014-00 |     |  |
| FLJ14816 | Cytotoxic | 84931  | NM_032845 | M-015019-00 |     |  |
| FLJ14834 | Cytotoxic | 84935  | NM_032849 | M-016348-00 |     |  |
| FLJ20232 | Cytotoxic | 54471  | NM_019008 | M-015938-00 |     |  |
| FLJ20308 | Cytotoxic | 54890  | NM_017758 | M-004281-00 |     |  |
| FLJ20345 | Cytotoxic | 54903  | NM_017777 | M-020774-00 |     |  |
| FLJ20582 | Cytotoxic | 54989  | NM_014106 | M-022215-00 |     |  |
| FLJ20847 | Cytotoxic | 55048  | NM_017966 | M-018204-00 |     |  |
| FLJ20896 | Cytotoxic | 79658  | NM_024605 | M-009382-00 |     |  |
| FLJ22595 | Cytotoxic | 80117  | NM_025047 | M-009028-00 |     |  |
| FLJ22679 | Cytotoxic | 84187  | NM_032227 | M-014805-00 |     |  |
| FLJ22795 | Cytotoxic | 80154  | NM_025084 | M-014578-00 |     |  |
| FLJ23047 | Cytotoxic | 79598  | NM_024548 | M-018133-00 | YES |  |
| FLJ23129 | Cytotoxic | 79819  | NM_024763 | M-019275-00 |     |  |
| FLJ23447 | Cytotoxic | 79883  | NM_024825 | M-014469-00 |     |  |
| FLJ23554 | Cytotoxic | 79864  | NM_024806 | M-014456-00 |     |  |
| FLJ23751 | Cytotoxic | 92370  | NM_152282 | M-008557-00 |     |  |
| FLJ25005 | Cytotoxic | 123283 | NM_152334 | M-015734-00 |     |  |
| FLJ25037 | Cytotoxic | 285905 | NM_182596 | M-018864-00 |     |  |
| FLJ25477 | Cytotoxic | 219287 | NM_152704 | M-017021-00 |     |  |
| FLJ26056 | Cytotoxic | 375127 | NM_201401 | M-027329-00 |     |  |
| FLJ27365 | Cytotoxic | 400931 | NM_207477 | M-032162-00 |     |  |
| FLJ27505 | Cytotoxic | 389320 | NM_207408 | M-032081-00 |     |  |
| FLJ30473 | Cytotoxic | 150209 | NM_144704 | M-008134-00 |     |  |
| FLJ30681 | Cytotoxic | 147372 | NM_133459 | M-023544-00 |     |  |
| FLJ31153 | Cytotoxic | 123811 | NM_144600 | M-016243-00 |     |  |
| FLJ31300 | Cytotoxic | 131669 | NM_144639 | M-016023-00 |     |  |
| FLJ32011 | Cytotoxic | 148930 | NM_182516 | M-018573-00 |     |  |
| FLJ32770 | Cytotoxic | 157376 | NM_182525 | M-018907-00 |     |  |
| FLJ32833 | Cytotoxic | 148545 | NM_152488 | M-016713-00 |     |  |
| FLJ32915 | Cytotoxic | 219844 | NM_145014 | M-016600-00 |     |  |
| FLJ35119 | Cytotoxic | 126074 | NM_175871 | M-017913-00 |     |  |
| FLJ35767 | Cytotoxic | 400629 | NM_207459 | M-032144-00 |     |  |
| FLJ35784 | Cytotoxic | 374877 | NM_198534 | M-027331-00 |     |  |
| FLJ36046 | Cytotoxic | 164592 | NM_152612 | M-018314-00 |     |  |
| FLJ36180 | Cytotoxic | 339976 | NM_178556 | M-007174-00 |     |  |
| FLJ36601 | Cytotoxic | 286464 | NM_173695 | M-018043-00 |     |  |
| FLJ36748 | Cytotoxic | 134265 | XM_059702 | M-024339-00 |     |  |
| FLJ38379 | Cytotoxic | 285097 | NM_178530 | M-017660-00 |     |  |

|          |           |        |             |             |     |  |
|----------|-----------|--------|-------------|-------------|-----|--|
| FLJ38964 | Cytotoxic | 161253 | NM_173527   | M-008318-00 |     |  |
| FLJ38984 | Cytotoxic | 127703 | NM_152374   | M-016893-00 |     |  |
| FLJ44082 | Cytotoxic | 389762 | NM_207416   | M-032090-00 |     |  |
| FLJ45717 | Cytotoxic | 388759 | NM_207401   | M-032078-00 |     |  |
| FLJ45909 | Cytotoxic | 126432 | NM_198445   | M-027209-00 |     |  |
| FLJ46072 | Cytotoxic | 286077 | NM_198488   | M-027239-00 |     |  |
| FLJ46380 | Cytotoxic | 388591 | NM_207396   | M-032070-00 |     |  |
| FLJ46481 | Cytotoxic | 389197 | NM_207405   | M-032082-00 |     |  |
| FLJ90165 | Cytotoxic | 124975 | NM_153338   | M-016666-00 |     |  |
| FLJ90166 | Cytotoxic | 164284 | NM_153360   | M-015754-00 |     |  |
| FLJ90430 | Cytotoxic | 340252 | NM_178558   | M-018017-00 |     |  |
| FMNL2    | Cytotoxic | 114793 | NM_052905   | M-031993-00 |     |  |
| FOSL1    | Cytotoxic | 8061   | NM_005438   | M-004341-00 |     |  |
| FOXB1    | Cytotoxic | 27023  | NM_012182   | M-008906-00 |     |  |
| FRBZ1    | Cytotoxic | 360023 | NM_194314   | M-019293-00 |     |  |
| FRG2     | Cytotoxic | 448831 | NM_00100521 | M-032420-00 |     |  |
| FTHFD    | Cytotoxic | 10840  | NM_012190   | M-008414-00 |     |  |
| FUT4     | Cytotoxic | 2526   | NM_002033   | M-019635-00 |     |  |
| G0S2     | Cytotoxic | 50486  | NM_015714   | M-015771-00 |     |  |
| G10      | Cytotoxic | 8896   | NM_003910   | M-018665-00 |     |  |
| GA17     | Cytotoxic | 10480  | NM_006360   | M-016219-00 |     |  |
| GAB3     | Cytotoxic | 139716 | NM_080612   | M-015239-00 |     |  |
| GAGEC1   | Cytotoxic | 9506   | NM_007003   | M-012344-00 |     |  |
| GAGED4   | Cytotoxic | 170626 | NM_130776   | M-017500-00 |     |  |
| GARNL1   | Cytotoxic | 253959 | XM_210022   | M-021937-00 | YES |  |
| GARP     | Cytotoxic | 2615   | NM_005512   | M-012100-00 |     |  |
| GATA1    | Cytotoxic | 2623   | NM_002049   | M-009610-00 |     |  |
| GBP3     | Cytotoxic | 2635   | NM_018284   | M-031864-00 |     |  |
| GDEP     | Cytotoxic | 118425 | NM_058168   | M-015213-00 |     |  |
| GDF1     | Cytotoxic | 2657   | NM_001492   | M-013088-00 |     |  |
| GGA1     | Cytotoxic | 26088  | NM_00100156 | M-013694-00 | YES |  |
| GGPS1    | Cytotoxic | 9453   | NM_004837   | M-016477-00 |     |  |
| GGTLA4   | Cytotoxic | 92086  | NM_080920   | M-005887-01 |     |  |
| GLTP     | Cytotoxic | 51228  | NM_016433   | M-017247-00 |     |  |
| GLYAT    | Cytotoxic | 10249  | NM_005838   | M-010274-00 |     |  |
| GMEB1    | Cytotoxic | 10691  | NM_006582   | M-012284-01 |     |  |
| GNG3     | Cytotoxic | 2785   | NM_012202   | M-012804-00 |     |  |
| GNG8     | Cytotoxic | 94235  | NM_033258   | M-031976-00 |     |  |
| GNGT2    | Cytotoxic | 2793   | NM_031498   | M-012042-00 |     |  |
| GNRH2    | Cytotoxic | 2797   | NM_001501   | M-011288-00 |     |  |
| GOT2     | Cytotoxic | 2806   | NM_002080   | M-011674-00 |     |  |
| GPC1     | Cytotoxic | 2817   | NM_002081   | M-004303-00 |     |  |
| GPKOW    | Cytotoxic | 27238  | NM_015698   | M-015129-00 |     |  |
| GPR132   | Cytotoxic | 29933  | NM_013345   | M-005507-01 |     |  |
| GPR27    | Cytotoxic | 2850   | NM_018971   | M-005562-01 |     |  |
| GPR84    | Cytotoxic | 53831  | NM_020370   | M-005604-00 |     |  |
| GRIP2    | Cytotoxic | 80852  | XM_042936   | M-023449-00 |     |  |
| GRP      | Cytotoxic | 2922   | NM_002091   | M-017724-00 |     |  |
| GTF2E1   | Cytotoxic | 2960   | NM_005513   | M-006531-00 |     |  |
| GULP1    | Cytotoxic | 51454  | NM_016315   | M-008406-00 |     |  |
| GZMM     | Cytotoxic | 3004   | NM_005317   | M-005892-00 |     |  |
| HAPLN2   | Cytotoxic | 60484  | NM_021817   | M-013976-00 |     |  |
| HBM      | Cytotoxic | 445449 | NM_00100393 | M-032371-00 |     |  |

|             |           |        |           |             |     |  |
|-------------|-----------|--------|-----------|-------------|-----|--|
| HCLS1       | Cytotoxic | 3059   | NM_005335 | M-017739-00 |     |  |
| HDCMA18P    | Cytotoxic | 51574  | NM_016648 | M-020996-00 |     |  |
| HEBP1       | Cytotoxic | 50865  | NM_015987 | M-013115-00 |     |  |
| HELIC1      | Cytotoxic | 10973  | NM_006828 | M-012757-00 |     |  |
| HES4        | Cytotoxic | 57801  | NM_021170 | M-016117-00 |     |  |
| HHLA3       | Cytotoxic | 11147  | NM_007071 | M-019762-00 |     |  |
| HIBADH      | Cytotoxic | 11112  | NM_152740 | M-009681-00 |     |  |
| HIST1H2AL   | Cytotoxic | 8332   | NM_003511 | M-011434-00 |     |  |
| HIST1H2BO   | Cytotoxic | 8348   | NM_003527 | M-011447-00 |     |  |
| HLA-DOB     | Cytotoxic | 3112   | NM_002120 | M-011686-00 |     |  |
| HLA-DQB2    | Cytotoxic | 3120   | NM_182549 | M-018944-00 |     |  |
| HLA-DRB3    | Cytotoxic | 3125   | NM_022555 | M-013204-00 |     |  |
| HMGA1L4     | Cytotoxic | 83444  | NM_031288 | M-009848-00 |     |  |
| HMGN1       | Cytotoxic | 3150   | NM_004965 | M-015567-00 |     |  |
| HMGN4       | Cytotoxic | 10473  | NM_006353 | M-017567-00 |     |  |
| HNRPA2B1    | Cytotoxic | 3181   | NM_002137 | M-011690-00 |     |  |
| HNRPC       | Cytotoxic | 3183   | NM_004500 | M-011869-00 |     |  |
| HNRPK       | Cytotoxic | 3190   | NM_002140 | M-011692-00 |     |  |
| HOM-TES-103 | Cytotoxic | 25900  | NM_080730 | M-012988-00 |     |  |
| HOXB8       | Cytotoxic | 3218   | NM_024016 | M-017527-00 |     |  |
| HOXC12      | Cytotoxic | 3228   | NM_173860 | M-017677-00 |     |  |
| HOXC5       | Cytotoxic | 3222   | NM_018953 | M-013381-00 |     |  |
| HPCL2       | Cytotoxic | 26061  | NM_012260 | M-019772-00 |     |  |
| HRBL        | Cytotoxic | 3268   | NM_006076 | M-016363-00 |     |  |
| HRD1        | Cytotoxic | 84447  | NM_032431 | M-007090-00 |     |  |
| HRMT1L1     | Cytotoxic | 3275   | NM_001535 | M-004033-00 |     |  |
| HSCARG      | Cytotoxic | 57407  | NM_020677 | M-020759-00 |     |  |
| HSPA5       | Cytotoxic | 3309   | NM_005347 | M-008198-01 |     |  |
| HSPB1       | Cytotoxic | 3315   | NM_001540 | M-005269-01 |     |  |
| HSPC009     | Cytotoxic | 28958  | NM_014019 | M-020558-00 |     |  |
| HSPC128     | Cytotoxic | 29080  | NM_014167 | M-020693-00 |     |  |
| HSYN        | Cytotoxic | 55188  | NM_018157 | M-021081-00 |     |  |
| HT008       | Cytotoxic | 55852  | NM_018469 | M-017117-00 |     |  |
| HT021       | Cytotoxic | 57415  | NM_020685 | M-017892-00 |     |  |
| HUMAQUANTIG | Cytotoxic | 29889  | NM_013285 | M-020392-00 |     |  |
| IBRDC2      | Cytotoxic | 255488 | NM_182757 | M-025119-00 |     |  |
| ICAM3       | Cytotoxic | 3385   | NM_002162 | M-011698-00 |     |  |
| IFNK        | Cytotoxic | 56832  | NM_020124 | M-013217-00 |     |  |
| IFNW1       | Cytotoxic | 3467   | NM_002177 | M-012638-00 |     |  |
| IGSF10      | Cytotoxic | 285313 | NM_178822 | M-018007-00 |     |  |
| IGSF2       | Cytotoxic | 9398   | NM_004258 | M-019858-00 |     |  |
| IK          | Cytotoxic | 3550   | NM_006083 | M-012190-00 | YES |  |
| ILVBL       | Cytotoxic | 10994  | NM_006844 | M-009658-00 |     |  |
| IMAGE:42153 | Cytotoxic | 113177 | NM_052878 | M-023899-00 |     |  |
| IMP4        | Cytotoxic | 92856  | NM_033416 | M-015116-00 |     |  |
| INCENP      | Cytotoxic | 3619   | NM_020238 | M-006823-00 |     |  |
| IQCB1       | Cytotoxic | 9657   | NM_014642 | M-021206-00 |     |  |
| IRF2BP2     | Cytotoxic | 359948 | NM_182972 | M-007177-00 |     |  |
| IRX6        | Cytotoxic | 79190  | NM_024335 | M-022561-00 |     |  |
| ISCU        | Cytotoxic | 23479  | NM_014301 | M-012837-00 |     |  |
| ISLR        | Cytotoxic | 3671   | NM_005545 | M-017742-00 |     |  |
| ITGA8       | Cytotoxic | 8516   | XM_167711 | M-010699-00 |     |  |
| ITSN2       | Cytotoxic | 50618  | NM_006277 | M-009841-00 |     |  |

|           |           |        |           |             |     |          |
|-----------|-----------|--------|-----------|-------------|-----|----------|
| JDP2      | Cytotoxic | 122953 | NM_130469 | M-008321-00 |     |          |
| JMJD2A    | Cytotoxic | 9682   | NM_014663 | M-004292-00 |     |          |
| K-ALPHA-1 | Cytotoxic | 10376  | NM_006082 | M-020062-00 |     |          |
| KCNH2     | Cytotoxic | 3757   | NM_000238 | M-006233-01 |     |          |
| KCNJ4     | Cytotoxic | 3761   | NM_004981 | M-006249-00 |     |          |
| KCNJ6     | Cytotoxic | 3763   | NM_002240 | M-006251-00 |     |          |
| KCTD11    | Cytotoxic | 147040 | XM_085689 | M-023046-00 |     |          |
| KCTD12    | Cytotoxic | 115207 | NM_138444 | M-015610-00 | YES |          |
| KCTD15    | Cytotoxic | 79047  | NM_024076 | M-014292-00 |     |          |
| KCTD8     | Cytotoxic | 386617 | NM_198353 | M-031732-00 |     |          |
| KDEL3     | Cytotoxic | 11015  | NM_006855 | M-012316-00 |     |          |
| KIAA0125  | Cytotoxic | 9834   | NM_014792 | M-012968-00 |     |          |
| KIAA0146  | Cytotoxic | 23514  | XM_291253 | M-025937-00 |     |          |
| KIAA0182  | Cytotoxic | 23199  | NM_014615 | M-022627-00 |     |          |
| KIAA0195  | Cytotoxic | 9772   | NM_014738 | M-020722-00 |     |          |
| KIAA0258  | Cytotoxic | 9827   | XM_376830 | M-021128-00 |     |          |
| KIAA0296  | Cytotoxic | 9726   | NM_014699 | M-021050-00 |     |          |
| KIAA0363  | Cytotoxic | 23148  | XM_166571 | M-025327-00 |     |          |
| KIAA0427  | Cytotoxic | 9811   | NM_014772 | M-021020-00 |     |          |
| KIAA0527  | Cytotoxic | 26032  | XM_171054 | M-023461-00 |     |          |
| KIAA0543  | Cytotoxic | 23145  | XM_376720 | M-028871-00 |     |          |
| KIAA0565  | Cytotoxic | 9720   | XM_113947 | M-023028-00 |     |          |
| KIAA0643  | Cytotoxic | 23059  | NM_024793 | M-014449-00 |     |          |
| KIAA0649  | Cytotoxic | 9858   | NM_014811 | M-021259-00 |     |          |
| KIAA0763  | Cytotoxic | 9922   | NM_014869 | M-006458-00 |     |          |
| KIAA0841  | Cytotoxic | 23354  | XM_049237 | M-023648-00 |     |          |
| KIAA0863  | Cytotoxic | 22850  | NM_014913 | M-020456-00 |     |          |
| KIAA0892  | Cytotoxic | 23383  | XM_048457 | M-031981-00 |     |          |
| KIAA0947  | Cytotoxic | 23379  | XM_029101 | M-024272-00 |     |          |
| KIAA1007  | Cytotoxic | 23019  | NM_016284 | M-015369-00 |     |          |
| KIAA1093  | Cytotoxic | 23112  | XM_039385 | M-024575-00 |     |          |
| KIAA1107  | Cytotoxic | 23285  | XM_034086 | M-021628-00 | YES |          |
| KIAA1110  | Cytotoxic | 23280  | XM_370667 | M-030156-00 |     |          |
| KIAA1160  | Cytotoxic | 57461  | NM_020701 | M-013894-00 | YES |          |
| KIAA1161  | Cytotoxic | 57462  | XM_372083 | M-026129-00 |     |          |
| KIAA1449  | Cytotoxic | 57599  | NM_020839 | M-016462-00 |     |          |
| KIAA1529  | Cytotoxic | 57653  | XM_372133 | M-026179-00 |     |          |
| KIAA1539  | Cytotoxic | 80256  | NM_025182 | M-019475-00 |     |          |
| KIAA1596  | Cytotoxic | 57697  | XM_048128 | M-021955-00 |     | KIAA1596 |
| KIAA1713  | Cytotoxic | 80816  | XM_290811 | M-023422-00 |     |          |
| KIAA1737  | Cytotoxic | 85457  | NM_033426 | M-019119-00 |     |          |
| KIAA1822  | Cytotoxic | 84439  | NM_032425 | M-022058-00 |     |          |
| KIAA1853  | Cytotoxic | 84530  | XM_375000 | M-030175-00 |     |          |
| KIAA1881  | Cytotoxic | 114782 | XM_375558 | M-023922-00 |     |          |
| KIAA1893  | Cytotoxic | 114787 | NM_052899 | M-015158-00 |     |          |
| KIF11     | Cytotoxic | 3832   | NM_004523 | M-003317-01 | YES |          |
| KIR2DS4   | Cytotoxic | 3809   | NM_012314 | M-012814-00 |     |          |
| KRT3      | Cytotoxic | 3850   | NM_057088 | M-012902-00 |     |          |
| KRTAP2-4  | Cytotoxic | 85294  | NM_033184 | M-013686-00 |     |          |
| KRTAP3-1  | Cytotoxic | 83896  | NM_031958 | M-013516-00 |     |          |
| KRTAP4-5  | Cytotoxic | 85289  | NM_033188 | M-013660-00 |     |          |
| KRTAP9-2  | Cytotoxic | 83899  | NM_031961 | M-013518-00 |     |          |
| LAD1      | Cytotoxic | 3898   | NM_005558 | M-017231-00 |     |          |

|           |           |        |           |             |  |  |
|-----------|-----------|--------|-----------|-------------|--|--|
| LAMP1     | Cytotoxic | 3916   | NM_005561 | M-013481-00 |  |  |
| LAMR1     | Cytotoxic | 3921   | NM_002295 | M-013303-00 |  |  |
| LAT1-3TM  | Cytotoxic | 81893  | NM_031211 | M-007342-01 |  |  |
| LBH       | Cytotoxic | 81606  | NM_030915 | M-014248-00 |  |  |
| LCE3A     | Cytotoxic | 353142 | NM_178431 | M-019026-00 |  |  |
| LENEP     | Cytotoxic | 55891  | NM_018655 | M-021082-00 |  |  |
| LEP11     | Cytotoxic | 353140 | NM_178429 | M-019024-00 |  |  |
| LETM1     | Cytotoxic | 3954   | NM_012318 | M-019549-00 |  |  |
| LGALS1    | Cytotoxic | 3956   | NM_002305 | M-011718-00 |  |  |
| LGI2      | Cytotoxic | 55203  | NM_018176 | M-017097-00 |  |  |
| LHFP      | Cytotoxic | 10186  | NM_005780 | M-020010-00 |  |  |
| LIF       | Cytotoxic | 3976   | NM_002309 | M-011720-00 |  |  |
| LILRB3    | Cytotoxic | 11025  | NM_006864 | M-008872-00 |  |  |
| LLGL1     | Cytotoxic | 3996   | NM_004140 | M-011877-00 |  |  |
| LMAN1L    | Cytotoxic | 79748  | NM_021819 | M-013977-00 |  |  |
| LMNB1     | Cytotoxic | 4001   | NM_005573 | M-005270-01 |  |  |
| LOC113828 | Cytotoxic | 113828 | NM_138435 | M-015492-00 |  |  |
| LOC114984 | Cytotoxic | 114984 | NM_138439 | M-015605-00 |  |  |
| LOC116064 | Cytotoxic | 116064 | XM_057296 | M-023580-00 |  |  |
| LOC116236 | Cytotoxic | 116236 | NM_198147 | M-023290-00 |  |  |
| LOC116412 | Cytotoxic | 116412 | XM_375665 | M-023837-00 |  |  |
| LOC120105 | Cytotoxic | 120114 | XM_061864 | M-026756-00 |  |  |
| LOC120379 | Cytotoxic | 120379 | NM_138789 | M-016573-00 |  |  |
| LOC121952 | Cytotoxic | 121952 | XM_062872 | M-021595-00 |  |  |
| LOC123346 | Cytotoxic | 123346 | XM_372578 | M-030423-00 |  |  |
| LOC124402 | Cytotoxic | 124402 | NM_145253 | M-015987-00 |  |  |
| LOC124446 | Cytotoxic | 124446 | XM_378175 | M-003993-01 |  |  |
| LOC125962 | Cytotoxic | 125962 | XM_064883 | M-024014-00 |  |  |
| LOC126370 | Cytotoxic | 126370 | XM_065050 | M-024025-00 |  |  |
| LOC126520 | Cytotoxic | 126520 | XM_059051 | M-023896-00 |  |  |
| LOC126731 | Cytotoxic | 126731 | NM_145257 | M-016008-00 |  |  |
| LOC127540 | Cytotoxic | 127540 | NM_145205 | M-016743-00 |  |  |
| LOC130678 | Cytotoxic | 130678 | XM_065828 | M-022993-00 |  |  |
| LOC130773 | Cytotoxic | 130773 | XM_065899 | M-022762-00 |  |  |
| LOC133609 | Cytotoxic | 133609 | XM_068430 | M-024426-00 |  |  |
| LOC143244 | Cytotoxic | 143244 | XM_084467 | M-026463-00 |  |  |
| LOC146713 | Cytotoxic | 146713 | XM_378712 | M-030816-00 |  |  |
| LOC147093 | Cytotoxic | 147093 | XM_378675 | M-030882-00 |  |  |
| LOC148137 | Cytotoxic | 148137 | NM_144692 | M-015733-00 |  |  |
| LOC149643 | Cytotoxic | 149643 | XM_086616 | M-021537-00 |  |  |
| LOC152663 | Cytotoxic | 152663 | XM_087499 | M-024116-00 |  |  |
| LOC157567 | Cytotoxic | 157567 | NM_198401 | M-025925-00 |  |  |
| LOC157693 | Cytotoxic | 157693 | XM_379540 | M-029254-00 |  |  |
| LOC158104 | Cytotoxic | 158104 | XM_016113 | M-026011-00 |  |  |
| LOC158345 | Cytotoxic | 158345 | XM_034640 | M-026115-00 |  |  |
| LOC162835 | Cytotoxic | DC     | XM_091830 | M-023395-00 |  |  |
| LOC162962 | Cytotoxic | 162962 | XM_091886 | M-023806-00 |  |  |
| LOC164714 | Cytotoxic | 164714 | XM_104657 | M-024646-00 |  |  |
| LOC170425 | Cytotoxic | 170425 | XM_378240 | M-029639-00 |  |  |
| LOC199964 | Cytotoxic | 199964 | NM_182532 | M-018940-00 |  |  |
| LOC200159 | Cytotoxic | 200159 | XM_114129 | M-022140-00 |  |  |
| LOC200491 | Cytotoxic | DC     | XM_117239 | M-022821-00 |  |  |
| LOC200916 | Cytotoxic | 200916 | XM_114317 | M-023649-00 |  |  |

|           |           |    |        |           |             |     |  |
|-----------|-----------|----|--------|-----------|-------------|-----|--|
| LOC201175 | Cytotoxic |    | 201175 | XM_371057 | M-030897-00 |     |  |
| LOC205251 | Cytotoxic |    | 205251 | NM_174925 | M-017831-00 |     |  |
| LOC256453 | Cytotoxic | DC |        | XM_172917 | M-021998-00 |     |  |
| LOC283247 | Cytotoxic | DC |        | XM_208058 | M-026799-00 |     |  |
| LOC283587 | Cytotoxic |    | 283587 | XM_211090 | M-021989-00 |     |  |
| LOC283989 | Cytotoxic |    | 283989 | NM_207346 | M-022947-00 | YES |  |
| LOC284361 | Cytotoxic |    | 284361 | NM_175063 | M-018434-00 |     |  |
| LOC284581 | Cytotoxic |    | 284581 | XM_375833 | M-027508-00 |     |  |
| LOC284628 | Cytotoxic |    | 284628 | XM_378951 | M-027695-00 |     |  |
| LOC285192 | Cytotoxic |    | 285192 | XM_380174 | M-023180-00 |     |  |
| LOC285344 | Cytotoxic | DC |        | XM_211853 | M-023476-00 |     |  |
| LOC285636 | Cytotoxic |    | 285636 | NM_175921 | M-018528-00 |     |  |
| LOC285658 | Cytotoxic | DC |        | XM_209704 | M-024603-00 |     |  |
| LOC285697 | Cytotoxic |    | 285697 | XM_210642 | M-024284-00 |     |  |
| LOC285721 | Cytotoxic | DC |        | XM_211995 | M-024301-00 |     |  |
| LOC285758 | Cytotoxic |    | 285758 | XM_379430 | M-028591-00 |     |  |
| LOC286080 | Cytotoxic | DC |        | XM_212162 | M-025807-00 |     |  |
| LOC286129 | Cytotoxic | DC |        | XM_209910 | M-025796-00 |     |  |
| LOC338749 | Cytotoxic | DC |        | XM_294692 | M-026778-00 |     |  |
| LOC339168 | Cytotoxic |    | 339168 | NM_198154 | M-021502-00 |     |  |
| LOC339209 | Cytotoxic |    | 339209 | XM_294854 | M-023216-00 |     |  |
| LOC339539 | Cytotoxic |    | 339539 | XM_378858 | M-027464-00 |     |  |
| LOC340351 | Cytotoxic |    | 340351 | XM_371952 | M-025456-00 |     |  |
| LOC340393 | Cytotoxic |    | 340393 | XM_291270 | M-025856-00 |     |  |
| LOC340485 | Cytotoxic |    | 340485 | XM_294540 | M-026152-00 |     |  |
| LOC342460 | Cytotoxic | DC |        | XM_292562 | M-022887-00 |     |  |
| LOC342994 | Cytotoxic |    | 342994 | XM_292836 | M-024038-00 |     |  |
| LOC343153 | Cytotoxic | DC |        | XM_291428 | M-021890-00 |     |  |
| LOC343474 | Cytotoxic | DC |        | XM_291584 | M-022115-00 |     |  |
| LOC344423 | Cytotoxic |    | 344423 | XM_293042 | M-022761-00 |     |  |
| LOC345456 | Cytotoxic |    | 345456 | XM_293821 | M-024326-00 |     |  |
| LOC345537 | Cytotoxic |    | 345537 | XM_293868 | M-024346-00 |     |  |
| LOC345557 | Cytotoxic |    | 345557 | XM_293875 | M-024494-00 |     |  |
| LOC345651 | Cytotoxic |    | 345651 | XM_293924 | M-024480-00 |     |  |
| LOC345930 | Cytotoxic |    | 345930 | XM_294019 | M-024733-00 |     |  |
| LOC346950 | Cytotoxic | DC |        | XM_294473 | M-025967-00 |     |  |
| LOC347438 | Cytotoxic | DC |        | XM_293352 | M-024932-00 |     |  |
| LOC374973 | Cytotoxic |    | 374973 | XM_371248 | M-027472-00 |     |  |
| LOC387662 | Cytotoxic |    | 387662 | XM_373456 | M-029676-00 |     |  |
| LOC387701 | Cytotoxic | DC |        | XM_373469 | M-029643-00 |     |  |
| LOC387715 | Cytotoxic |    | 387715 | XM_373477 | M-029661-00 |     |  |
| LOC387912 | Cytotoxic | DC |        | XM_370716 | M-030245-00 |     |  |
| LOC387930 | Cytotoxic |    | 387930 | XM_370727 | M-030228-00 |     |  |
| LOC388122 | Cytotoxic |    | 388122 | XM_370865 | M-030403-00 |     |  |
| LOC388132 | Cytotoxic |    | 388132 | XM_370872 | M-030421-00 |     |  |
| LOC388339 | Cytotoxic |    | 388339 | XM_371019 | M-030852-00 |     |  |
| LOC388344 | Cytotoxic |    | 388344 | XM_371023 | M-030859-00 |     |  |
| LOC388460 | Cytotoxic |    | 388460 | XM_371107 | M-031014-00 |     |  |
| LOC388474 | Cytotoxic |    | 388474 | XM_371115 | M-031048-00 |     |  |
| LOC388519 | Cytotoxic | DC |        | XM_371151 | M-031255-00 |     |  |
| LOC388532 | Cytotoxic |    | 388532 | XM_371160 | M-031085-00 |     |  |
| LOC388585 | Cytotoxic |    | 388585 | XM_371215 | M-007769-00 |     |  |
| LOC388595 | Cytotoxic |    | 388595 | XM_371222 | M-027638-00 |     |  |

|           |           |    |        |             |             |  |  |
|-----------|-----------|----|--------|-------------|-------------|--|--|
| LOC388720 | Cytotoxic |    | 388720 | XM_371330   | M-027597-00 |  |  |
| LOC388763 | Cytotoxic | DC |        | XM_371359   | M-027732-00 |  |  |
| LOC388828 | Cytotoxic |    | 25966  | XM_371416   | M-031406-00 |  |  |
| LOC388907 | Cytotoxic |    | 388907 | XM_371470   | M-031476-00 |  |  |
| LOC388923 | Cytotoxic |    | 388923 | XM_373973   | M-027888-00 |  |  |
| LOC388927 | Cytotoxic | DC |        | XM_371478   | M-027763-00 |  |  |
| LOC388931 | Cytotoxic |    | 388931 | XM_371481   | M-027813-00 |  |  |
| LOC389119 | Cytotoxic |    | 389119 | NM_203370   | M-031926-00 |  |  |
| LOC389170 | Cytotoxic |    | 389170 | XM_371674   | M-028188-00 |  |  |
| LOC389305 | Cytotoxic | DC |        | XM_371757   | M-028549-00 |  |  |
| LOC389308 | Cytotoxic |    | 389308 | XM_371758   | M-028553-00 |  |  |
| LOC389325 | Cytotoxic | DC |        | XM_374136   | M-028468-00 |  |  |
| LOC389342 | Cytotoxic |    | 389342 | XM_371781   | M-028407-00 |  |  |
| LOC389425 | Cytotoxic | DC |        | XM_371843   | M-028590-00 |  |  |
| LOC389435 | Cytotoxic |    | 389435 | XM_371853   | M-028616-00 |  |  |
| LOC389672 | Cytotoxic |    | 389672 | XM_372048   | M-029386-00 |  |  |
| LOC390006 | Cytotoxic |    | 390006 | XM_372328   | M-029670-00 |  |  |
| LOC390488 | Cytotoxic | DC |        | XM_372527   | M-030365-00 |  |  |
| LOC390975 | Cytotoxic |    | 390975 | XM_372749   | M-027175-00 |  |  |
| LOC391013 | Cytotoxic |    | 391013 | XM_372769   | M-010313-00 |  |  |
| LOC391088 | Cytotoxic | DC |        | XM_372789   | M-027445-00 |  |  |
| LOC391162 | Cytotoxic |    | 391162 | XM_372812   | M-027383-00 |  |  |
| LOC392467 | Cytotoxic | DC |        | XM_373349   | M-031552-00 |  |  |
| LOC399753 | Cytotoxic |    | 399753 | XM_378223   | M-029679-00 |  |  |
| LOC399815 | Cytotoxic |    | 399815 | XM_374836   | M-029694-00 |  |  |
| LOC400055 | Cytotoxic |    | 400055 | XM_374987   | M-030041-00 |  |  |
| LOC400547 | Cytotoxic | DC |        | XM_375373   | M-030707-00 |  |  |
| LOC400550 | Cytotoxic |    | 400550 | XM_378620   | M-030685-00 |  |  |
| LOC400551 | Cytotoxic | DC |        | XM_378621   | M-030686-00 |  |  |
| LOC400652 | Cytotoxic |    | 400652 | XM_375543   | M-031060-00 |  |  |
| LOC401019 | Cytotoxic |    | 401019 | XM_376154   | M-027993-00 |  |  |
| LOC401021 | Cytotoxic |    | 401021 | XM_379146   | M-027997-00 |  |  |
| LOC401081 | Cytotoxic |    | 401081 | XM_379206   | M-028145-00 |  |  |
| LOC401147 | Cytotoxic |    | 401147 | XM_376334   | M-028238-00 |  |  |
| LOC401169 | Cytotoxic | DC |        | XM_379306   | M-028377-00 |  |  |
| LOC401385 | Cytotoxic | DC |        | XM_379507   | M-028904-00 |  |  |
| LOC401386 | Cytotoxic | DC |        | XM_379508   | M-028905-00 |  |  |
| LOC401480 | Cytotoxic |    | 401480 | XM_379608   | M-029284-00 |  |  |
| LOC402245 | Cytotoxic | DC |        | XM_377926   | M-028847-00 |  |  |
| LOC402559 | Cytotoxic | DC |        | XM_379881   | M-031801-00 |  |  |
| LOC402563 | Cytotoxic | DC |        | XM_380128   | M-031807-00 |  |  |
| LOC402564 | Cytotoxic | DC |        | XM_380129   | M-031809-00 |  |  |
| LOC402586 | Cytotoxic |    | 154907 | XM_380138   | M-029126-00 |  |  |
| LOC474170 | Cytotoxic |    | 474170 | NM_00100660 | M-032505-00 |  |  |
| LOC51212  | Cytotoxic |    | 51212  | NM_016380   | M-021107-00 |  |  |
| LOC51236  | Cytotoxic |    | 51236  | NM_016458   | M-014264-00 |  |  |
| LOC51257  | Cytotoxic |    | 51257  | NM_016496   | M-006986-00 |  |  |
| LOC51326  | Cytotoxic |    | 51326  | NM_016632   | M-020667-00 |  |  |
| LOC51333  | Cytotoxic |    | 51333  | NM_016643   | M-006990-00 |  |  |
| LOC51334  | Cytotoxic |    | 51334  | NM_016644   | M-020347-00 |  |  |
| LOC51693  | Cytotoxic |    | 51693  | NM_016209   | M-021254-00 |  |  |
| LOC56902  | Cytotoxic |    | 56902  | NM_020143   | M-018033-00 |  |  |
| LOC56931  | Cytotoxic |    | 56931  | NM_020175   | M-031942-00 |  |  |



|          |           |        |           |             |     |  |
|----------|-----------|--------|-----------|-------------|-----|--|
| LOC81558 | Cytotoxic | 81558  | NM_030802 | M-018570-00 |     |  |
| LOC84664 | Cytotoxic | 84664  | NM_032577 | M-014926-00 |     |  |
| LOC89887 | Cytotoxic | 89887  | XM_058964 | M-023876-00 |     |  |
| LOC89944 | Cytotoxic | 89944  | NM_138342 | M-018681-00 |     |  |
| LOC90193 | Cytotoxic | 90193  | XM_029805 | M-027068-00 |     |  |
| LOC90321 | Cytotoxic | 90321  | XM_030896 | M-023807-00 |     |  |
| LOC90525 | Cytotoxic | 90525  | XM_032304 | M-022237-00 |     |  |
| LOC91219 | Cytotoxic | 91219  | NM_080924 | M-013362-00 |     |  |
| LOC91561 | Cytotoxic | 91561  | XM_039218 | M-026863-00 |     |  |
| LOC92129 | Cytotoxic | 92129  | XM_372239 | M-024787-00 |     |  |
| LOC92558 | Cytotoxic | 92558  | NM_207311 | M-027129-00 |     |  |
| LOC92755 | Cytotoxic | 92755  | XM_047083 | M-025894-00 |     |  |
| LOXL2    | Cytotoxic | 4017   | NM_002318 | M-008020-00 |     |  |
| LRCH3    | Cytotoxic | 84859  | NM_032773 | M-014993-00 |     |  |
| LRCH4    | Cytotoxic | 4034   | NM_002319 | M-011321-00 |     |  |
| LRP11    | Cytotoxic | 84918  | NM_032832 | M-018629-00 |     |  |
| LRP3     | Cytotoxic | 4037   | NM_002333 | M-019609-00 |     |  |
| LRRC4B   | Cytotoxic | 94030  | XM_292778 | M-023786-00 |     |  |
| LRRC8    | Cytotoxic | 56262  | NM_019594 | M-026211-00 |     |  |
| LSM6     | Cytotoxic | 11157  | NM_007080 | M-019754-00 |     |  |
| LTBP3    | Cytotoxic | 4054   | NM_021070 | M-014144-00 |     |  |
| LYNX1    | Cytotoxic | 66004  | NM_177477 | M-012886-00 |     |  |
| LZTS2    | Cytotoxic | 84445  | NM_032429 | M-026306-00 |     |  |
| MACF1    | Cytotoxic | 23499  | NM_012090 | M-013618-00 |     |  |
| MAF1     | Cytotoxic | 84232  | NM_032272 | M-018603-00 |     |  |
| MAG      | Cytotoxic | 4099   | NM_002361 | M-011722-00 |     |  |
| MAGEB2   | Cytotoxic | 4113   | NM_002364 | M-019094-00 |     |  |
| MAP3K3   | Cytotoxic | 4215   | NM_002401 | M-003301-02 |     |  |
| MAPBPIP  | Cytotoxic | 28956  | NM_014017 | M-020556-00 |     |  |
| MARS     | Cytotoxic | 4141   | NM_004990 | M-006447-00 |     |  |
| MAT2A    | Cytotoxic | 4144   | NM_005911 | M-008818-00 |     |  |
| MBD3L2   | Cytotoxic | 125997 | NM_144614 | M-017360-00 |     |  |
| MDA5     | Cytotoxic | 64135  | NM_022168 | M-013041-00 |     |  |
| MECT1    | Cytotoxic | 23373  | NM_015321 | M-014026-00 |     |  |
| MEF2B    | Cytotoxic | 4207   | NM_005919 | M-009342-00 |     |  |
| MFAP1    | Cytotoxic | 4236   | NM_005926 | M-020071-00 |     |  |
| MGC10561 | Cytotoxic | 84733  | NM_032647 | M-008357-00 |     |  |
| MGC10701 | Cytotoxic | 84744  | NM_032658 | M-014951-00 |     |  |
| MGC10744 | Cytotoxic | 84314  | NM_032354 | M-010979-00 |     |  |
| MGC11266 | Cytotoxic | 79172  | NM_024322 | M-014339-00 |     |  |
| MGC13024 | Cytotoxic | 93129  | NM_152288 | M-015896-00 |     |  |
| MGC13045 | Cytotoxic | 84304  | NM_032344 | M-014867-00 |     |  |
| MGC13114 | Cytotoxic | 84326  | NM_032366 | M-017010-00 |     |  |
| MGC13138 | Cytotoxic | 92595  | NM_033410 | M-007109-00 |     |  |
| MGC13204 | Cytotoxic | 83695  | NM_031465 | M-014736-00 | YES |  |
| MGC15429 | Cytotoxic | 84836  | NM_032750 | M-009831-00 |     |  |
| MGC15631 | Cytotoxic | 84839  | NM_032753 | M-016157-00 |     |  |
| MGC15716 | Cytotoxic | 84330  | NM_032370 | M-014882-00 |     |  |
| MGC15737 | Cytotoxic | 85012  | NM_032926 | M-018635-00 | YES |  |
| MGC15882 | Cytotoxic | 84970  | NM_032884 | M-015033-00 |     |  |
| MGC15885 | Cytotoxic | 197003 | XM_378517 | M-030411-00 |     |  |
| MGC16121 | Cytotoxic | 84848  | NM_032762 | M-014989-00 |     |  |
| MGC16186 | Cytotoxic | 84332  | NM_032372 | M-014884-00 |     |  |

|          |           |        |             |             |     |  |
|----------|-----------|--------|-------------|-------------|-----|--|
| MGC16279 | Cytotoxic | 85002  | NM_032916   | M-015046-00 |     |  |
| MGC16372 | Cytotoxic | 92749  | NM_145038   | M-016558-00 |     |  |
| MGC16491 | Cytotoxic | 115572 | NM_052943   | M-015169-00 |     |  |
| MGC16733 | Cytotoxic | 92105  | NM_033547   | M-015112-00 |     |  |
| MGC17299 | Cytotoxic | 128218 | NM_144626   | M-016058-00 |     |  |
| MGC17330 | Cytotoxic | 113791 | NM_052880   | M-021298-00 |     |  |
| MGC17791 | Cytotoxic | 126282 | NM_152362   | M-016446-00 |     |  |
| MGC17943 | Cytotoxic | 90488  | NM_152261   | M-015480-00 |     |  |
| MGC20235 | Cytotoxic | 113277 | NM_145041   | M-016385-00 |     |  |
| MGC20481 | Cytotoxic | 90416  | NM_052849   | M-019187-00 |     |  |
| MGC2408  | Cytotoxic | 84291  | NM_032331   | M-014859-00 |     |  |
| MGC2452  | Cytotoxic | 84730  | NM_032644   | M-014948-00 |     |  |
| MGC26885 | Cytotoxic | 124044 | NM_152339   | M-018294-00 |     |  |
| MGC27121 | Cytotoxic | 408263 | NM_00100134 | M-032302-00 |     |  |
| MGC2803  | Cytotoxic | 79002  | NM_024038   | M-014270-00 |     |  |
| MGC2963  | Cytotoxic | 83460  | NM_031298   | M-014711-00 |     |  |
| MGC29816 | Cytotoxic | 91782  | NM_152272   | M-015514-00 |     |  |
| MGC29875 | Cytotoxic | 27042  | NM_014388   | M-018287-00 |     |  |
| MGC3020  | Cytotoxic | 79014  | NM_024048   | M-016475-00 |     |  |
| MGC31963 | Cytotoxic | 112770 | NM_144580   | M-016364-00 |     |  |
| MGC33407 | Cytotoxic | 284382 | NM_178525   | M-017981-00 |     |  |
| MGC34680 | Cytotoxic | 124935 | NM_152346   | M-016443-00 |     |  |
| MGC34728 | Cytotoxic | 152065 | NM_152533   | M-016066-00 |     |  |
| MGC34829 | Cytotoxic | 284069 | XM_208993   | M-030894-00 |     |  |
| MGC35118 | Cytotoxic | 145942 | NM_152453   | M-016378-00 |     |  |
| MGC40499 | Cytotoxic | 245812 | NM_152755   | M-016983-00 |     |  |
| MGC4238  | Cytotoxic | 84292  | NM_032332   | M-014860-00 |     |  |
| MGC4368  | Cytotoxic | 79415  | NM_024510   | M-016389-00 |     |  |
| MGC4549  | Cytotoxic | 84337  | NM_032377   | M-014888-00 |     |  |
| MGC45806 | Cytotoxic | 115273 | NM_152304   | M-009144-00 |     |  |
| MGC5309  | Cytotoxic | 84246  | NM_032286   | M-014834-00 |     |  |
| MGC57211 | Cytotoxic | 150165 | NM_175878   | M-018044-00 |     |  |
| MGC8974  | Cytotoxic | 115353 | NM_052940   | M-018700-00 | YES |  |
| MICAL3   | Cytotoxic | 57553  | XM_032997   | M-024432-00 |     |  |
| MIS12    | Cytotoxic | 79003  | NM_024039   | M-014271-00 |     |  |
| MLR1     | Cytotoxic | 254251 | NM_153686   | M-019001-00 |     |  |
| MLR2     | Cytotoxic | 84458  | XM_050988   | M-026303-00 |     |  |
| MOBKL2A  | Cytotoxic | 126308 | NM_130807   | M-015299-00 |     |  |
| MORF4L1  | Cytotoxic | 10933  | NM_006791   | M-006379-00 |     |  |
| MPG      | Cytotoxic | 4350   | NM_002434   | M-005146-00 |     |  |
| MRPL16   | Cytotoxic | 54948  | NM_017840   | M-013354-00 |     |  |
| MRPL20   | Cytotoxic | 55052  | NM_017971   | M-017564-00 |     |  |
| MRPL27   | Cytotoxic | 51264  | NM_148571   | M-013182-00 |     |  |
| MRPL53   | Cytotoxic | 116540 | NM_053050   | M-012941-00 |     |  |
| MRPS17   | Cytotoxic | 51373  | NM_015969   | M-013215-00 |     |  |
| MRPS6    | Cytotoxic | 64968  | NM_032476   | M-019243-00 |     |  |
| MRPS7    | Cytotoxic | 51081  | NM_015971   | M-013580-00 |     |  |
| MSL3L1   | Cytotoxic | 10943  | NM_078628   | M-012319-00 |     |  |
| MSLN     | Cytotoxic | 10232  | NM_005823   | M-006346-00 |     |  |
| MT3      | Cytotoxic | 4504   | NM_005954   | M-012728-00 |     |  |
| MTBP     | Cytotoxic | 27085  | NM_022045   | M-013953-00 |     |  |
| MTND1    | Cytotoxic | 4535   | NM_173708   | M-012827-00 |     |  |
| MTO1     | Cytotoxic | 25821  | NM_012123   | M-010190-00 |     |  |

|          |           |        |           |             |     |  |
|----------|-----------|--------|-----------|-------------|-----|--|
| MUC4     | Cytotoxic | 4585   | NM_018406 | M-004577-00 |     |  |
| MUC7     | Cytotoxic | 4589   | NM_152291 | M-015885-00 |     |  |
| MUM1     | Cytotoxic | 84939  | NM_032853 | M-019083-00 | YES |  |
| MUSTN1   | Cytotoxic | 389125 | XM_371644 | M-031907-00 |     |  |
| MYCT1    | Cytotoxic | 80177  | NM_025107 | M-027137-00 |     |  |
| MYL4     | Cytotoxic | 4635   | NM_002476 | M-011738-00 |     |  |
| MYST2    | Cytotoxic | 11143  | NM_007067 | M-017668-00 | YES |  |
| NAP5     | Cytotoxic | 344148 | XM_292943 | M-022918-00 |     |  |
| NAPA     | Cytotoxic | 8775   | NM_003827 | M-011530-00 |     |  |
| NCBP1    | Cytotoxic | 4686   | NM_002486 | M-019672-00 |     |  |
| NCOA4    | Cytotoxic | 8031   | NM_005437 | M-010321-00 |     |  |
| NDUFA7   | Cytotoxic | 4701   | NM_005001 | M-012693-00 |     |  |
| NDUFB1   | Cytotoxic | 4707   | NM_004545 | M-017848-00 |     |  |
| NEDD1    | Cytotoxic | 121441 | NM_152905 | M-008306-00 |     |  |
| NEK11    | Cytotoxic | 79858  | NM_024800 | M-004865-01 |     |  |
| NEUROD6  | Cytotoxic | 63974  | NM_022728 | M-008708-00 |     |  |
| NHP2L1   | Cytotoxic | 4809   | NM_005008 | M-019900-00 |     |  |
| NIP30    | Cytotoxic | 80011  | NM_024946 | M-014528-00 |     |  |
| NIPA2    | Cytotoxic | 81614  | NM_030922 | M-014672-00 |     |  |
| NIT1     | Cytotoxic | 4817   | NM_005600 | M-020022-00 |     |  |
| NMNAT3   | Cytotoxic | 349565 | NM_178177 | M-008688-00 |     |  |
| NNMT     | Cytotoxic | 4837   | NM_006169 | M-010351-00 |     |  |
| NODAL    | Cytotoxic | 4838   | NM_018055 | M-017771-00 |     |  |
| NOL3     | Cytotoxic | 8996   | NM_003946 | M-004432-00 |     |  |
| NOL5A    | Cytotoxic | 10528  | NM_006392 | M-019143-00 |     |  |
| NOL7     | Cytotoxic | 51406  | NM_016167 | M-013853-00 |     |  |
| NOR1     | Cytotoxic | 127700 | NM_145047 | M-016554-00 |     |  |
| NP25     | Cytotoxic | 29114  | NM_013259 | M-020295-00 |     |  |
| NPAT     | Cytotoxic | 4863   | NM_002519 | M-019599-00 | YES |  |
| NPC1L1   | Cytotoxic | 29881  | NM_013389 | M-008048-00 |     |  |
| NPTXR    | Cytotoxic | 23467  | NM_014293 | M-012507-00 |     |  |
| NR1H2    | Cytotoxic | 7376   | NM_007121 | M-003412-01 |     |  |
| NR2E3    | Cytotoxic | 10002  | NM_014249 | M-003420-00 |     |  |
| NR4A1    | Cytotoxic | 3164   | NM_002135 | M-003426-03 |     |  |
| NR5A1    | Cytotoxic | 2516   | NM_004959 | M-003429-00 |     |  |
| NSF      | Cytotoxic | 4905   | NM_006178 | M-009401-00 |     |  |
| NUP133   | Cytotoxic | 55746  | NM_018230 | M-013322-00 |     |  |
| NUP205   | Cytotoxic | 23165  | XM_058073 | M-010646-00 |     |  |
| NUP62    | Cytotoxic | 23636  | NM_012346 | M-012468-00 |     |  |
| NUP88    | Cytotoxic | 4927   | NM_002532 | M-017547-00 | YES |  |
| NUP98    | Cytotoxic | 4928   | NM_005387 | M-013078-00 |     |  |
| NXF1     | Cytotoxic | 10482  | NM_006362 | M-013680-00 |     |  |
| NYD-SP14 | Cytotoxic | 83894  | NM_031956 | M-014763-00 |     |  |
| NYD-SP21 | Cytotoxic | 84689  | NM_032597 | M-014933-00 |     |  |
| NYD-SP29 | Cytotoxic | 126820 | NM_145172 | M-016848-00 |     |  |
| OKL38    | Cytotoxic | 29948  | NM_013370 | M-010197-00 |     |  |
| OLFM1    | Cytotoxic | 10439  | NM_014279 | M-012203-00 |     |  |
| OLFM2    | Cytotoxic | 93145  | NM_058164 | M-015212-00 |     |  |
| OLFM3    | Cytotoxic | 118427 | XM_088951 | M-021637-00 |     |  |
| OSRF     | Cytotoxic | 23548  | NM_012382 | M-009819-00 |     |  |
| OSTM1    | Cytotoxic | 28962  | NM_014028 | M-021389-00 |     |  |
| OSTN     | Cytotoxic | 344901 | NM_198184 | M-032025-00 |     |  |
| P24B     | Cytotoxic | 23423  | NM_007364 | M-008051-00 |     |  |

|          |           |        |           |             |     |       |
|----------|-----------|--------|-----------|-------------|-----|-------|
| P2RX2    | Cytotoxic | 22953  | NM_012226 | M-006283-00 |     |       |
| P8       | Cytotoxic | 26471  | NM_012385 | M-012819-00 |     |       |
| PAGE-5   | Cytotoxic | 90737  | NM_130467 | M-017468-00 |     |       |
| PAPOLA   | Cytotoxic | 10914  | NM_032632 | M-018882-00 |     |       |
| PAQR9    | Cytotoxic | 344838 | NM_198504 | M-008055-00 |     |       |
| PART1    | Cytotoxic | 25859  | NM_016590 | M-013380-00 |     |       |
| PAX7     | Cytotoxic | 5081   | NM_002584 | M-011745-00 |     |       |
| PCBD     | Cytotoxic | 5092   | NM_000281 | M-008748-00 |     |       |
| PCP2     | Cytotoxic | 126006 | XM_058956 | M-024078-00 |     |       |
| PCQAP    | Cytotoxic | 51586  | NM_015889 | M-017015-00 |     |       |
| PDCD1LG1 | Cytotoxic | 29126  | NM_014143 | M-015836-00 |     |       |
| PDCD4    | Cytotoxic | 27250  | NM_014456 | M-004438-02 |     |       |
| PDCD5    | Cytotoxic | 9141   | NM_004708 | M-004439-01 |     |       |
| PELI1    | Cytotoxic | 57162  | NM_020651 | M-013814-00 |     |       |
| PEX11G   | Cytotoxic | 92960  | NM_080662 | M-015251-00 |     |       |
| PEX13    | Cytotoxic | 5194   | NM_002618 | M-012591-00 |     |       |
| PEX5R    | Cytotoxic | 51555  | NM_016559 | M-021130-00 |     |       |
| PHF2     | Cytotoxic | 5253   | NM_005392 | M-012912-00 |     |       |
| PIGM     | Cytotoxic | 93183  | NM_145167 | M-017388-00 |     |       |
| PIGO     | Cytotoxic | 84720  | NM_032634 | M-008728-00 |     |       |
| PIGW     | Cytotoxic | 284098 | NM_178517 | M-021480-00 |     |       |
| PIPOX    | Cytotoxic | 51268  | NM_016518 | M-010199-00 |     |       |
| PIPPIN   | Cytotoxic | 27254  | NM_014460 | M-012844-00 |     |       |
| PISD     | Cytotoxic | 23761  | NM_014338 | M-009548-00 |     |       |
| PKN3     | Cytotoxic | 29941  | NM_013355 | M-004647-00 |     |       |
| PLA2G1B  | Cytotoxic | 5319   | NM_000928 | M-008873-00 |     |       |
| PLAA     | Cytotoxic | 9373   | NM_004253 | M-016215-00 |     |       |
| PLCL4    | Cytotoxic | 9651   | XM_371214 | M-027529-00 |     |       |
| PLK1     | Cytotoxic | 5347   | NM_005030 | M-003290-01 |     |       |
| PLVAP    | Cytotoxic | 83483  | NM_031310 | M-014714-00 |     |       |
| PNLIPRP1 | Cytotoxic | 5407   | NM_006229 | M-009145-00 |     |       |
| PNMA2    | Cytotoxic | 10687  | XM_376764 | M-017715-00 |     |       |
| PNUTL2   | Cytotoxic | 5414   | NM_004574 | M-011886-00 |     |       |
| POLE2    | Cytotoxic | 5427   | NM_002692 | M-018612-00 |     | POLE2 |
| POLR2A   | Cytotoxic | 5430   | NM_000937 | M-011186-01 |     |       |
| POLR2B   | Cytotoxic | 5431   | NM_000938 | M-011187-00 |     |       |
| POLR2C   | Cytotoxic | 5432   | NM_002694 | M-009620-00 |     |       |
| POLR2D   | Cytotoxic | 5433   | NM_004805 | M-011943-00 |     |       |
| POLR2E   | Cytotoxic | 5434   | NM_002695 | M-004739-00 |     |       |
| POLR2F   | Cytotoxic | 5435   | NM_021974 | M-004723-00 |     |       |
| POLR2H   | Cytotoxic | 5437   | NM_006232 | M-012247-00 |     |       |
| POLR2I   | Cytotoxic | 5438   | NM_006233 | M-012248-00 | YES |       |
| POLR2J   | Cytotoxic | 5439   | NM_006234 | M-012249-00 |     |       |
| POLR2K   | Cytotoxic | 5440   | NM_005034 | M-011979-00 |     |       |
| POLR2L   | Cytotoxic | 5441   | NM_021128 | M-013133-00 |     |       |
| POLR3E   | Cytotoxic | 55718  | NM_018119 | M-020773-00 | YES |       |
| POU3F4   | Cytotoxic | 5456   | NM_000307 | M-019344-00 |     |       |
| PP1057   | Cytotoxic | 83441  | NM_031285 | M-014704-00 |     |       |
| PP1665   | Cytotoxic | 81544  | NM_030792 | M-019423-00 |     |       |
| PP3111   | Cytotoxic | 64118  | NM_022156 | M-015688-00 |     |       |
| PPAP2C   | Cytotoxic | 8612   | NM_003712 | M-011500-00 |     |       |
| PPIL4    | Cytotoxic | 85313  | NM_139126 | M-010401-00 |     |       |
| PPIL6    | Cytotoxic | 285755 | NM_173672 | M-009111-00 |     |       |

|          |           |        |             |             |     |  |
|----------|-----------|--------|-------------|-------------|-----|--|
| PPP1R10  | Cytotoxic | 5514   | NM_002714   | M-011358-00 |     |  |
| PPP3R1   | Cytotoxic | 5534   | NM_000945   | M-009869-01 |     |  |
| PPRC1    | Cytotoxic | 23082  | NM_015062   | M-016647-00 |     |  |
| PRAP1    | Cytotoxic | 118471 | NM_145202   | M-027286-00 |     |  |
| PRKAB1   | Cytotoxic | 5564   | NM_006253   | M-007675-00 |     |  |
| PRKAG3   | Cytotoxic | 53632  | NM_017431   | M-009859-01 |     |  |
| PRND     | Cytotoxic | 23627  | NM_012409   | M-019271-00 |     |  |
| PROL3    | Cytotoxic | 10879  | NM_006685   | M-020063-00 |     |  |
| PROL5    | Cytotoxic | 26952  | NM_012390   | M-020197-00 |     |  |
| PROSAPI1 | Cytotoxic | 9762   | NM_014731   | M-013436-00 |     |  |
| PROSC    | Cytotoxic | 11212  | NM_007198   | M-008449-00 |     |  |
| PRPF4    | Cytotoxic | 9128   | NM_004697   | M-015638-00 |     |  |
| PRPF8    | Cytotoxic | 10594  | NM_006445   | M-012252-01 | YES |  |
| PRSS11   | Cytotoxic | 5654   | NM_002775   | M-006009-00 |     |  |
| PRY2     | Cytotoxic | 442862 | NM_00100275 | M-032351-00 |     |  |
| PSCA     | Cytotoxic | 8000   | NM_005672   | M-003697-00 |     |  |
| PSG5     | Cytotoxic | 5673   | NM_002781   | M-015989-00 |     |  |
| PSG6     | Cytotoxic | 5675   | NM_002782   | M-020127-00 |     |  |
| PSMA1    | Cytotoxic | 5682   | NM_002786   | M-010123-01 |     |  |
| PSMA2    | Cytotoxic | 5683   | NM_002787   | M-011757-00 |     |  |
| PSMA3    | Cytotoxic | 5684   | NM_002788   | M-011758-00 |     |  |
| PSMA4    | Cytotoxic | 5685   | NM_002789   | M-017211-00 |     |  |
| PSMA5    | Cytotoxic | 5686   | NM_002790   | M-011359-00 |     |  |
| PSMA6    | Cytotoxic | 5687   | NM_002791   | M-011360-00 |     |  |
| PSMA7    | Cytotoxic | 5688   | NM_002792   | M-004209-00 |     |  |
| PSMB1    | Cytotoxic | 5689   | NM_002793   | M-011361-00 |     |  |
| PSMB3    | Cytotoxic | 5691   | NM_002795   | M-017489-00 |     |  |
| PSMB4    | Cytotoxic | 5692   | NM_002796   | M-011362-00 |     |  |
| PSMB6    | Cytotoxic | 5694   | NM_002798   | M-006020-00 |     |  |
| PSMB7    | Cytotoxic | 5695   | NM_002799   | M-006021-00 |     |  |
| PSMC1    | Cytotoxic | 5700   | NM_002802   | M-009578-00 |     |  |
| PSMC3    | Cytotoxic | 5702   | NM_002804   | M-008738-01 |     |  |
| PSMC4    | Cytotoxic | 5704   | NM_006503   | M-009261-00 |     |  |
| PSMC5    | Cytotoxic | 5705   | NM_002805   | M-009484-00 |     |  |
| PSMC6    | Cytotoxic | 5706   | NM_002806   | M-009570-00 |     |  |
| PSMD1    | Cytotoxic | 5707   | NM_002807   | M-011363-00 |     |  |
| PSMD11   | Cytotoxic | 5717   | NM_002815   | M-011367-00 |     |  |
| PSMD12   | Cytotoxic | 5718   | NM_002816   | M-011368-00 |     |  |
| PSMD14   | Cytotoxic | 10213  | NM_005805   | M-006024-00 |     |  |
| PSMD3    | Cytotoxic | 5709   | NM_002809   | M-011364-00 |     |  |
| PSMD7    | Cytotoxic | 5713   | NM_002811   | M-009621-01 |     |  |
| PSMD8    | Cytotoxic | 5714   | NM_002812   | M-017583-00 |     |  |
| PSMF1    | Cytotoxic | 9491   | NM_006814   | M-012320-00 |     |  |
| PTCRA    | Cytotoxic | 171558 | NM_138296   | M-017157-00 |     |  |
| PTMA     | Cytotoxic | 5757   | NM_002823   | M-005207-01 |     |  |
| PUNC     | Cytotoxic | 9543   | NM_004884   | M-012689-00 |     |  |
| PYY      | Cytotoxic | 5697   | NM_004160   | M-019822-00 |     |  |
| QP-C     | Cytotoxic | 27089  | NM_014402   | M-012517-00 |     |  |
| QSCN6    | Cytotoxic | 5768   | NM_002826   | M-011371-00 |     |  |
| RALB     | Cytotoxic | 5899   | NM_002881   | M-008403-00 |     |  |
| RAN      | Cytotoxic | 5901   | NM_006325   | M-010353-00 |     |  |
| RAPGEF6  | Cytotoxic | 51735  | NM_016340   | M-008593-00 | YES |  |
| RASSF4   | Cytotoxic | 83937  | NM_032023   | M-017587-00 |     |  |

|         |           |        |           |             |     |  |
|---------|-----------|--------|-----------|-------------|-----|--|
| RB1CC1  | Cytotoxic | 9821   | NM_014781 | M-021117-00 |     |  |
| RBAF600 | Cytotoxic | 23352  | NM_020765 | M-014021-00 |     |  |
| RBBP9   | Cytotoxic | 10741  | NM_006606 | M-017623-00 |     |  |
| RBJ     | Cytotoxic | 51277  | NM_016544 | M-009842-00 |     |  |
| RBM22   | Cytotoxic | 55696  | NM_018047 | M-021186-00 |     |  |
| RBM27   | Cytotoxic | 54439  | XM_291128 | M-024337-00 |     |  |
| RBM3    | Cytotoxic | 5935   | NM_006743 | M-018969-00 |     |  |
| RBM8A   | Cytotoxic | 9939   | NM_005105 | M-003531-00 |     |  |
| RCE1    | Cytotoxic | 9986   | NM_005133 | M-006025-00 |     |  |
| RCN3    | Cytotoxic | 57333  | NM_020650 | M-017962-00 |     |  |
| RDH5    | Cytotoxic | 5959   | NM_002905 | M-008220-01 |     |  |
| REA     | Cytotoxic | 11331  | NM_007273 | M-018703-00 |     |  |
| REG1B   | Cytotoxic | 5968   | NM_006507 | M-012297-00 |     |  |
| RFT1    | Cytotoxic | 91869  | NM_052859 | M-018174-00 |     |  |
| RFWD3   | Cytotoxic | 55159  | NM_018124 | M-017095-00 | YES |  |
| RGS8    | Cytotoxic | 85397  | NM_033345 | M-008229-00 |     |  |
| RHBG    | Cytotoxic | 57127  | NM_020407 | M-020429-00 |     |  |
| RIMS4   | Cytotoxic | 140730 | NM_182970 | M-021322-00 | YES |  |
| RNF10   | Cytotoxic | 9921   | NM_014868 | M-006918-00 |     |  |
| RNF137  | Cytotoxic | 55128  | NM_018073 | M-007007-00 |     |  |
| RNF28   | Cytotoxic | 84676  | NM_032588 | M-007093-00 |     |  |
| RNF5    | Cytotoxic | 6048   | NM_006913 | M-006558-00 |     |  |
| ROXAN   | Cytotoxic | 23264  | NM_017590 | M-017425-00 |     |  |
| RPA2    | Cytotoxic | 6118   | NM_002946 | M-017058-00 |     |  |
| RPH3A   | Cytotoxic | 22895  | NM_014954 | M-020354-00 |     |  |
| RPL10   | Cytotoxic | 6134   | NM_006013 | M-012164-00 |     |  |
| RPL10A  | Cytotoxic | 4736   | NM_007104 | M-013666-00 |     |  |
| RPL11   | Cytotoxic | 6135   | NM_000975 | M-013703-00 |     |  |
| RPL13A  | Cytotoxic | 23521  | NM_012423 | M-013601-00 |     |  |
| RPL14   | Cytotoxic | 9045   | NM_003973 | M-012948-00 |     |  |
| RPL15   | Cytotoxic | 6138   | NM_002948 | M-013718-00 |     |  |
| RPL17   | Cytotoxic | 6139   | NM_000985 | M-013633-00 |     |  |
| RPL18   | Cytotoxic | 6141   | NM_000979 | M-011142-00 |     |  |
| RPL18A  | Cytotoxic | 6142   | NM_000980 | M-011158-00 |     |  |
| RPL19   | Cytotoxic | 6143   | NM_000981 | M-010865-00 |     |  |
| RPL21   | Cytotoxic | 6144   | NM_000982 | M-012910-00 |     |  |
| RPL23   | Cytotoxic | 9349   | NM_000978 | M-013634-00 |     |  |
| RPL23A  | Cytotoxic | 6147   | NM_000984 | M-012863-00 |     |  |
| RPL24   | Cytotoxic | 6152   | NM_000986 | M-011144-00 |     |  |
| RPL26   | Cytotoxic | 6154   | NM_000987 | M-011132-00 |     |  |
| RPL27   | Cytotoxic | 6155   | NM_000988 | M-012859-00 |     |  |
| RPL27A  | Cytotoxic | 6157   | NM_000990 | M-011159-00 |     |  |
| RPL3    | Cytotoxic | 6122   | NM_000967 | M-012975-00 |     |  |
| RPL30   | Cytotoxic | 6156   | NM_000989 | M-013604-00 |     |  |
| RPL31   | Cytotoxic | 6160   | NM_000993 | M-013587-00 |     |  |
| RPL32   | Cytotoxic | 6161   | NM_000994 | M-011146-00 |     |  |
| RPL34   | Cytotoxic | 6164   | NM_000995 | M-013545-00 |     |  |
| RPL35   | Cytotoxic | 11224  | NM_007209 | M-012371-00 |     |  |
| RPL35A  | Cytotoxic | 6165   | NM_000996 | M-013543-00 |     |  |
| RPL36   | Cytotoxic | 25873  | NM_015414 | M-010130-00 |     |  |
| RPL36A  | Cytotoxic | 6173   | NM_021029 | M-013480-00 |     |  |
| RPL37   | Cytotoxic | 6167   | NM_000997 | M-011147-00 |     |  |
| RPL37A  | Cytotoxic | 6168   | NM_000998 | M-013478-00 |     |  |

|         |           |       |           |             |     |      |
|---------|-----------|-------|-----------|-------------|-----|------|
| RPL38   | Cytotoxic | 6169  | NM_000999 | M-011133-00 |     |      |
| RPL39   | Cytotoxic | 6170  | NM_001000 | M-011148-00 |     |      |
| RPL4    | Cytotoxic | 6124  | NM_000968 | M-008956-00 |     |      |
| RPL5    | Cytotoxic | 6125  | NM_000969 | M-013611-00 |     |      |
| RPL6    | Cytotoxic | 6128  | NM_000970 | M-012955-00 |     |      |
| RPL7    | Cytotoxic | 6129  | NM_000971 | M-013727-00 |     |      |
| RPL7A   | Cytotoxic | 6130  | NM_000972 | M-011134-00 |     |      |
| RPL8    | Cytotoxic | 6132  | NM_000973 | M-013721-00 |     |      |
| RPL9    | Cytotoxic | 6133  | NM_000661 | M-011139-00 |     |      |
| RPLP0   | Cytotoxic | 6175  | NM_001002 | M-010864-00 |     |      |
| RPLP1   | Cytotoxic | 6176  | NM_001003 | M-011135-00 |     |      |
| RPLP2   | Cytotoxic | 6181  | NM_001004 | M-004314-00 |     |      |
| RPS10   | Cytotoxic | 6204  | NM_001014 | M-011136-00 |     |      |
| RPS11   | Cytotoxic | 6205  | NM_001015 | M-013569-00 |     |      |
| RPS12   | Cytotoxic | 6206  | NM_001016 | M-011149-00 |     |      |
| RPS13   | Cytotoxic | 6207  | NM_001017 | M-011150-00 |     |      |
| RPS14   | Cytotoxic | 6208  | NM_005617 | M-013532-00 |     |      |
| RPS15   | Cytotoxic | 6209  | NM_001018 | M-011151-00 |     |      |
| RPS15A  | Cytotoxic | 6210  | NM_001019 | M-013542-00 |     |      |
| RPS16   | Cytotoxic | 6217  | NM_001020 | M-013627-00 |     |      |
| RPS17   | Cytotoxic | 6218  | NM_001021 | M-011152-00 |     |      |
| RPS18   | Cytotoxic | 6222  | NM_022551 | M-011890-00 |     |      |
| RPS19   | Cytotoxic | 6223  | NM_001022 | M-003771-00 |     |      |
| RPS2    | Cytotoxic | 6187  | NM_002952 | M-013690-00 |     |      |
| RPS20   | Cytotoxic | 6224  | NM_001023 | M-011137-00 |     |      |
| RPS21   | Cytotoxic | 6227  | NM_001024 | M-011153-00 |     |      |
| RPS23   | Cytotoxic | 6228  | NM_001025 | M-011154-00 |     |      |
| RPS24   | Cytotoxic | 6229  | NM_001026 | M-011155-00 |     |      |
| RPS26   | Cytotoxic | 6231  | NM_001029 | M-013675-00 |     |      |
| RPS28   | Cytotoxic | 6234  | NM_001031 | M-013679-00 |     |      |
| RPS29   | Cytotoxic | 6235  | NM_001032 | M-011157-00 |     |      |
| RPS3    | Cytotoxic | 6188  | NM_001005 | M-013607-00 |     |      |
| RPS3A   | Cytotoxic | 6189  | NM_001006 | M-013603-00 |     |      |
| RPS4X   | Cytotoxic | 6191  | NM_001007 | M-011138-00 |     |      |
| RPS5    | Cytotoxic | 6193  | NM_001009 | M-010498-01 |     |      |
| RPS6    | Cytotoxic | 6194  | NM_001010 | M-003024-01 |     |      |
| RPS7    | Cytotoxic | 6201  | NM_001011 | M-013700-00 |     |      |
| RPS8    | Cytotoxic | 6202  | NM_001012 | M-011140-00 |     |      |
| RPS9    | Cytotoxic | 6203  | NM_001013 | M-011131-00 |     |      |
| RRM1    | Cytotoxic | 6240  | NM_001033 | M-004270-00 |     | RRM1 |
| RRM2    | Cytotoxic | 6241  | NM_001034 | M-010379-01 |     | RRM2 |
| RRN3    | Cytotoxic | 54700 | NM_018427 | M-016947-00 |     |      |
| RTBDN   | Cytotoxic | 83546 | NM_031429 | M-014723-00 |     |      |
| RTN4IP1 | Cytotoxic | 84816 | NM_032730 | M-010131-01 |     |      |
| RTN4R   | Cytotoxic | 65078 | NM_023004 | M-008075-01 |     |      |
| RTTN    | Cytotoxic | 25914 | NM_173630 | M-031139-00 |     |      |
| RUNX2   | Cytotoxic | 860   | NM_004348 | M-012665-00 |     |      |
| RUVBL2  | Cytotoxic | 10856 | NM_006666 | M-012299-00 | YES |      |
| SARA2   | Cytotoxic | 51128 | NM_016103 | M-021029-00 |     |      |
| SARM1   | Cytotoxic | 23098 | NM_015077 | M-008076-00 |     |      |
| SART2   | Cytotoxic | 29940 | NM_013352 | M-013644-00 |     |      |
| SCFD1   | Cytotoxic | 23256 | NM_016106 | M-010943-00 | YES |      |
| SCN1B   | Cytotoxic | 6324  | NM_001037 | M-020909-00 |     |      |

|          |           |        |           |             |     |  |
|----------|-----------|--------|-----------|-------------|-----|--|
| SCNM1    | Cytotoxic | 79005  | NM_024041 | M-014273-00 |     |  |
| SCRT1    | Cytotoxic | 83482  | NM_031309 | M-013490-00 |     |  |
| SCUBE1   | Cytotoxic | 80274  | NM_173050 | M-017693-00 |     |  |
| SDS      | Cytotoxic | 10993  | NM_006843 | M-008214-00 |     |  |
| SEC13L1  | Cytotoxic | 6396   | NM_030673 | M-012351-00 |     |  |
| SEC3L1   | Cytotoxic | 55763  | NM_018261 | M-013312-00 |     |  |
| SEC61G   | Cytotoxic | 23480  | NM_014302 | M-012509-00 |     |  |
| SEC6L1   | Cytotoxic | 11336  | NM_007277 | M-019010-00 |     |  |
| SEMG2    | Cytotoxic | 6407   | NM_003008 | M-019709-00 |     |  |
| SEPW1    | Cytotoxic | 6415   | NM_003009 | M-019585-00 |     |  |
| SEZ6     | Cytotoxic | 124925 | NM_178860 | M-008080-00 |     |  |
| SF3A1    | Cytotoxic | 10291  | NM_005877 | M-016051-00 | YES |  |
| SF3B1    | Cytotoxic | 23451  | NM_012433 | M-020061-00 |     |  |
| SF3B2    | Cytotoxic | 10992  | XM_290506 | M-026599-00 | YES |  |
| SF3B3    | Cytotoxic | 23450  | NM_012426 | M-020085-00 |     |  |
| SF3B5    | Cytotoxic | 83443  | NM_031287 | M-014706-00 | YES |  |
| SFPQ     | Cytotoxic | 6421   | NM_005066 | M-006455-01 |     |  |
| SFRS1    | Cytotoxic | 6426   | NM_006924 | M-018672-00 |     |  |
| SFRS3    | Cytotoxic | 6428   | NM_003017 | M-030081-00 |     |  |
| SGOL1    | Cytotoxic | 151648 | NM_138484 | M-015475-00 |     |  |
| SGSH     | Cytotoxic | 6448   | NM_000199 | M-009053-01 |     |  |
| SHANK2   | Cytotoxic | 22941  | NM_012309 | M-012459-00 |     |  |
| SIAT4B   | Cytotoxic | 6483   | NM_006927 | M-012352-00 |     |  |
| SIAT7E   | Cytotoxic | 81849  | NM_030965 | M-014685-00 |     |  |
| SIGLEC7  | Cytotoxic | 27036  | NM_014385 | M-020546-00 |     |  |
| SIGLEC8  | Cytotoxic | 27181  | NM_014442 | M-012843-00 |     |  |
| SIN3B    | Cytotoxic | 23309  | XM_050561 | M-031246-00 |     |  |
| SITPEC   | Cytotoxic | 51295  | NM_016581 | M-010826-00 |     |  |
| SKIP     | Cytotoxic | 80309  | XM_051221 | M-023135-00 |     |  |
| SLBP     | Cytotoxic | 7884   | NM_006527 | M-012286-00 |     |  |
| SLC10A3  | Cytotoxic | 8273   | NM_019848 | M-007378-00 |     |  |
| SLC13A4  | Cytotoxic | 26266  | NM_012450 | M-007394-00 |     |  |
| SLC1A3   | Cytotoxic | 6507   | NM_004172 | M-007427-00 |     |  |
| SLC1A6   | Cytotoxic | 6511   | NM_005071 | M-007430-00 |     |  |
| SLC24A2  | Cytotoxic | 25769  | NM_020344 | M-007465-00 |     |  |
| SLC25A11 | Cytotoxic | 8402   | NM_003562 | M-007470-00 |     |  |
| SLC25A14 | Cytotoxic | 9016   | NM_003951 | M-007473-00 |     |  |
| SLC25A17 | Cytotoxic | 10478  | NM_006358 | M-007476-00 |     |  |
| SLC25A2  | Cytotoxic | 83884  | NM_031947 | M-007479-00 |     |  |
| SLC26A1  | Cytotoxic | 10861  | NM_022042 | M-007488-00 |     |  |
| SLC28A2  | Cytotoxic | 9153   | NM_004212 | M-007504-00 |     |  |
| SLC2A5   | Cytotoxic | 6518   | NM_003039 | M-007518-00 |     |  |
| SLC30A9  | Cytotoxic | 10463  | NM_006345 | M-007530-00 |     |  |
| SLC31A1  | Cytotoxic | 1317   | NM_001859 | M-007531-00 |     |  |
| SLC35B4  | Cytotoxic | 84912  | NM_032826 | M-007545-00 |     |  |
| SLC37A3  | Cytotoxic | 84255  | NM_032295 | M-007556-00 |     |  |
| SLC39A7  | Cytotoxic | 7922   | NM_006979 | M-007338-00 |     |  |
| SLC41A3  | Cytotoxic | 54946  | NM_017836 | M-007330-00 |     |  |
| SLC9A3R2 | Cytotoxic | 9351   | NM_004785 | M-006660-00 |     |  |
| SLCO2B1  | Cytotoxic | 11309  | NM_007256 | M-007442-00 |     |  |
| SLU7     | Cytotoxic | 10569  | NM_006425 | M-017191-00 |     |  |
| SMAP1    | Cytotoxic | 60682  | NM_021940 | M-017275-00 |     |  |
| SMP3     | Cytotoxic | 80235  | NM_025163 | M-012954-00 |     |  |



|           |           |       |           |             |     |         |
|-----------|-----------|-------|-----------|-------------|-----|---------|
| SMU1      | Cytotoxic | 55234 | NM_018225 | M-021129-00 |     |         |
| SN        | Cytotoxic | 6614  | NM_023068 | M-017521-00 |     |         |
| SNAPAP    | Cytotoxic | 23557 | NM_012437 | M-015835-00 |     |         |
| SNAPC4    | Cytotoxic | 6621  | NM_003086 | M-019580-00 |     |         |
| SNRPB     | Cytotoxic | 6628  | NM_003091 | M-017766-00 |     |         |
| SNRPC     | Cytotoxic | 6631  | NM_003093 | M-019574-00 |     |         |
| SNRPD1    | Cytotoxic | 6632  | NM_006938 | M-012353-00 |     |         |
| SNRPD2    | Cytotoxic | 6633  | NM_004597 | M-013617-00 |     |         |
| SNX7      | Cytotoxic | 51375 | NM_015976 | M-013216-00 |     |         |
| SOC       | Cytotoxic | 91544 | NM_145345 | M-016403-00 |     |         |
| SOX14     | Cytotoxic | 8403  | NM_004189 | M-019055-00 |     |         |
| SOX21     | Cytotoxic | 11166 | NM_007084 | M-019728-00 |     |         |
| SP1       | Cytotoxic | 6667  | NM_138473 | M-026959-00 |     |         |
| SP192     | Cytotoxic | 60313 | NM_021639 | M-016463-00 |     |         |
| SPAG1     | Cytotoxic | 6674  | NM_003114 | M-004312-02 |     |         |
| SPANXA1   | Cytotoxic | 30014 | NM_013453 | M-013560-00 |     |         |
| SPANXA2   | Cytotoxic | 64650 | NM_145662 | M-017414-00 |     |         |
| SPATA11   | Cytotoxic | 84266 | NM_032306 | M-014847-00 |     |         |
| SPATA2    | Cytotoxic | 9825  | NM_006038 | M-020065-00 |     |         |
| SPINK4    | Cytotoxic | 27290 | NM_014471 | M-020235-00 |     |         |
| SPP2      | Cytotoxic | 6694  | NM_006944 | M-019720-00 |     |         |
| SPRR3     | Cytotoxic | 6707  | NM_005416 | M-019976-00 |     |         |
| SPUF      | Cytotoxic | 29937 | NM_013349 | M-016079-00 |     |         |
| SPUVE     | Cytotoxic | 11098 | NM_007173 | M-006043-00 |     |         |
| SRP46     | Cytotoxic | 10929 | NM_032102 | M-012323-00 |     |         |
| SRP72     | Cytotoxic | 6731  | NM_006947 | M-019716-00 |     |         |
| SS18L2    | Cytotoxic | 51188 | NM_016305 | M-021092-00 |     |         |
| SSB3      | Cytotoxic | 90864 | NM_080861 | M-017713-00 |     |         |
| SSB3      | Cytotoxic | 90864 | NM_080861 | M-017713-00 |     |         |
| SSB4      | Cytotoxic | 92369 | NM_080862 | M-015283-00 |     |         |
| SSPN      | Cytotoxic | 8082  | NM_005086 | M-011901-00 |     |         |
| STARD10   | Cytotoxic | 10809 | NM_006645 | M-012743-00 |     |         |
| STK6      | Cytotoxic | 6790  | NM_003600 | M-003545-09 | YES |         |
| STMN4     | Cytotoxic | 81551 | NM_030795 | M-016810-00 |     |         |
| STX6      | Cytotoxic | 10228 | NM_005819 | M-017164-00 | YES |         |
| STXBP2    | Cytotoxic | 6813  | NM_006949 | M-019713-00 |     |         |
| SUPT5H    | Cytotoxic | 6829  | NM_003169 | M-016234-00 |     |         |
| SUPT6H    | Cytotoxic | 6830  | NM_003170 | M-010540-01 |     |         |
| SURB7     | Cytotoxic | 9412  | NM_004264 | M-016221-00 |     |         |
| SYNCOILIN | Cytotoxic | 81493 | NM_030786 | M-014652-00 |     |         |
| SYNGR4    | Cytotoxic | 23546 | NM_012451 | M-012483-00 |     |         |
| SYNPO     | Cytotoxic | 11346 | NM_007286 | M-021390-00 |     |         |
| T1        | Cytotoxic | 83696 | NM_031466 | M-019414-00 |     |         |
| T1A-2     | Cytotoxic | 10630 | NM_006474 | M-017560-00 |     |         |
| T2BP      | Cytotoxic | 92610 | NM_052864 | M-015147-00 |     |         |
| TAX1BP3   | Cytotoxic | 30851 | NM_014604 | M-014192-00 |     |         |
| TBL3      | Cytotoxic | 10607 | NM_006453 | M-017431-00 |     |         |
| TCAP      | Cytotoxic | 8557  | NM_003673 | M-011496-00 |     |         |
| TCP10     | Cytotoxic | 6953  | NM_004610 | M-019823-00 |     |         |
| TEKT2     | Cytotoxic | 27285 | NM_014466 | M-012530-00 |     |         |
| TERF2IP   | Cytotoxic | 54386 | NM_018975 | M-021219-00 | YES | TERF2IP |
| TF        | Cytotoxic | 7018  | NM_001063 | M-011189-00 |     |         |
| TGM4      | Cytotoxic | 7047  | NM_003241 | M-008686-00 |     |         |

|           |           |        |           |             |     |  |
|-----------|-----------|--------|-----------|-------------|-----|--|
| THAP8     | Cytotoxic | 199745 | NM_152658 | M-021459-00 |     |  |
| THSD2     | Cytotoxic | 84870  | NM_032784 | M-012849-00 |     |  |
| TIGD5     | Cytotoxic | 84948  | NM_032862 | M-013595-00 |     |  |
| TIMM13    | Cytotoxic | 26517  | NM_012458 | M-009538-00 |     |  |
| TINP1     | Cytotoxic | 10412  | NM_014886 | M-017043-00 |     |  |
| TIP39     | Cytotoxic | 113091 | NM_178449 | M-017735-00 |     |  |
| TLL2      | Cytotoxic | 7093   | NM_012465 | M-006047-01 |     |  |
| TM4SF7    | Cytotoxic | 7106   | NM_003271 | M-010625-00 |     |  |
| TMC1      | Cytotoxic | 117531 | NM_138691 | M-017206-00 |     |  |
| TMP21     | Cytotoxic | 10972  | NM_006827 | M-003718-00 |     |  |
| TMPRSS5   | Cytotoxic | 80975  | NM_030770 | M-006051-00 |     |  |
| TMPRSS9   | Cytotoxic | 360200 | NM_182973 | M-019463-00 |     |  |
| TNFRSF13C | Cytotoxic | 115650 | NM_052945 | M-013424-00 |     |  |
| TNFRSF25  | Cytotoxic | 8718   | NM_003790 | M-004449-01 |     |  |
| TNP1      | Cytotoxic | 7141   | NM_003284 | M-017809-00 |     |  |
| TNRC15    | Cytotoxic | 26058  | NM_015575 | M-013918-00 |     |  |
| TNRC5     | Cytotoxic | 10695  | NM_006586 | M-019437-00 |     |  |
| TOE1      | Cytotoxic | 114034 | NM_025077 | M-018386-00 |     |  |
| TOMM7     | Cytotoxic | 54543  | NM_019059 | M-013762-00 |     |  |
| TPARL     | Cytotoxic | 55858  | NM_018475 | M-018846-00 |     |  |
| TPST1     | Cytotoxic | 8460   | NM_003596 | M-008839-00 |     |  |
| TPX2      | Cytotoxic | 22974  | NM_012112 | M-010571-00 | YES |  |
| TRIM11    | Cytotoxic | 81559  | NM_145214 | M-007075-00 |     |  |
| TRIM41    | Cytotoxic | 90933  | NM_033549 | M-007105-00 |     |  |
| TRIM52    | Cytotoxic | 84851  | NM_032765 | M-007095-00 |     |  |
| TRIM9     | Cytotoxic | 114088 | NM_015163 | M-012974-00 |     |  |
| TSP50     | Cytotoxic | 29122  | NM_013270 | M-009055-00 |     |  |
| TTC13     | Cytotoxic | 79573  | NM_024525 | M-018132-00 |     |  |
| TTC5      | Cytotoxic | 91875  | NM_138376 | M-015535-00 |     |  |
| TTK       | Cytotoxic | 7272   | NM_003318 | M-004105-00 |     |  |
| TLL1      | Cytotoxic | 25809  | NM_012263 | M-009556-00 |     |  |
| TTYH1     | Cytotoxic | 57348  | NM_020659 | M-020721-00 |     |  |
| TUBA6     | Cytotoxic | 84790  | NM_032704 | M-014966-00 |     |  |
| TUBG1     | Cytotoxic | 7283   | NM_001070 | M-005160-01 |     |  |
| TUFT1     | Cytotoxic | 7286   | NM_020127 | M-021218-00 |     |  |
| TXNDC2    | Cytotoxic | 84203  | NM_032243 | M-018662-00 |     |  |
| TXNDC9    | Cytotoxic | 10190  | NM_005783 | M-012079-00 |     |  |
| U5-200KD  | Cytotoxic | 23020  | NM_014014 | M-014161-00 |     |  |
| UBA52     | Cytotoxic | 7311   | NM_003333 | M-011794-00 |     |  |
| UBB       | Cytotoxic | 7314   | NM_018955 | M-013382-00 |     |  |
| UBC       | Cytotoxic | 7316   | NM_021009 | M-019408-00 |     |  |
| UNQ3030   | Cytotoxic | 375387 | NM_198565 | M-031838-00 |     |  |
| UNQ827    | Cytotoxic | 400830 | NM_207469 | M-032152-00 |     |  |
| UNQ9356   | Cytotoxic | 389400 | NM_207410 | M-032083-00 |     |  |
| UNQ9366   | Cytotoxic | 125931 | NM_198444 | M-027208-00 |     |  |
| UNQ9370   | Cytotoxic | 400454 | NM_207447 | M-032131-00 |     |  |
| UPK3B     | Cytotoxic | 80761  | NM_030570 | M-019188-00 |     |  |
| USP41     | Cytotoxic | 373856 | XM_036729 | M-031434-00 |     |  |
| UTP14A    | Cytotoxic | 10813  | NM_006649 | M-016395-00 | YES |  |
| VANGL2    | Cytotoxic | 57216  | XM_049695 | M-010581-00 |     |  |
| VCP       | Cytotoxic | 7415   | NM_007126 | M-008727-01 | YES |  |
| VEZATIN   | Cytotoxic | 55591  | NM_017599 | M-017105-00 |     |  |
| VIK       | Cytotoxic | 79027  | NM_024061 | M-012894-00 |     |  |

|        |           |        |           |             |     |  |
|--------|-----------|--------|-----------|-------------|-----|--|
| VIPR1  | Cytotoxic | 7433   | NM_004624 | M-005749-00 |     |  |
| VMP1   | Cytotoxic | 81671  | NM_030938 | M-015899-00 |     |  |
| VPS11  | Cytotoxic | 55823  | NM_021729 | M-007022-00 |     |  |
| VPS54  | Cytotoxic | 51542  | NM_016516 | M-021174-00 |     |  |
| WBP1   | Cytotoxic | 23559  | NM_012477 | M-012487-00 |     |  |
| WDR12  | Cytotoxic | 55759  | NM_018256 | M-012972-00 |     |  |
| WDR13  | Cytotoxic | 64743  | NM_017883 | M-021319-00 |     |  |
| WDR4   | Cytotoxic | 10785  | NM_018669 | M-013491-00 |     |  |
| WINS1  | Cytotoxic | 55180  | NM_018148 | M-019129-00 |     |  |
| WNT8B  | Cytotoxic | 7479   | NM_003393 | M-009409-00 |     |  |
| XAB1   | Cytotoxic | 11321  | NM_007266 | M-021485-00 |     |  |
| ZBTB16 | Cytotoxic | 7704   | NM_006006 | M-018719-01 |     |  |
| ZBTB2  | Cytotoxic | 57621  | NM_020861 | M-014129-00 | YES |  |
| ZBTB4  | Cytotoxic | 57659  | NM_020899 | M-014149-00 |     |  |
| ZCCHC2 | Cytotoxic | 54877  | NM_017742 | M-027338-00 |     |  |
| ZCCHC9 | Cytotoxic | 84240  | NM_032280 | M-014831-00 |     |  |
| ZDHC1  | Cytotoxic | 29800  | NM_013304 | M-014193-00 |     |  |
| ZDHC11 | Cytotoxic | 79844  | NM_024786 | M-014447-00 |     |  |
| ZDHC18 | Cytotoxic | 84243  | XM_046911 | M-021844-00 |     |  |
| ZFP276 | Cytotoxic | 92822  | NM_152287 | M-015702-00 |     |  |
| ZFP95  | Cytotoxic | 23660  | NM_014569 | M-013583-00 |     |  |
| ZG16   | Cytotoxic | 123887 | NM_152338 | M-015694-00 |     |  |
| ZNF117 | Cytotoxic | 7670   | NM_024498 | M-014163-00 |     |  |
| ZNF142 | Cytotoxic | 7701   | XM_376172 | M-019930-00 |     |  |
| ZNF16  | Cytotoxic | 7564   | NM_006958 | M-012773-00 |     |  |
| ZNF205 | Cytotoxic | 7755   | NM_003456 | M-019556-00 |     |  |
| ZNF207 | Cytotoxic | 7756   | NM_003457 | M-019557-00 |     |  |
| ZNF212 | Cytotoxic | 7988   | NM_012256 | M-017526-00 |     |  |
| ZNF256 | Cytotoxic | 10172  | NM_005773 | M-021347-00 |     |  |
| ZNF275 | Cytotoxic | 10838  | XM_372267 | M-024859-00 |     |  |
| ZNF286 | Cytotoxic | 57335  | NM_020652 | M-020716-00 |     |  |
| ZNF287 | Cytotoxic | 57336  | NM_020653 | M-007035-00 |     |  |
| ZNF300 | Cytotoxic | 91975  | NM_052860 | M-015144-00 |     |  |
| ZNF32  | Cytotoxic | 7580   | NM_006973 | M-012775-00 |     |  |
| ZNF34  | Cytotoxic | 80778  | NM_030580 | M-018566-00 |     |  |
| ZNF41  | Cytotoxic | 7592   | NM_007130 | M-012388-00 |     |  |
| ZNF441 | Cytotoxic | 126068 | NM_152355 | M-016909-00 |     |  |
| ZNF496 | Cytotoxic | 84838  | NM_032752 | M-014983-00 |     |  |
| ZNF576 | Cytotoxic | 79177  | NM_024327 | M-014337-00 |     |  |
| ZNF594 | Cytotoxic | 84622  | XM_290737 | M-023003-00 |     |  |
| ZNF76  | Cytotoxic | 7629   | NM_003427 | M-015952-00 |     |  |
| ZSWIM1 | Cytotoxic | 90204  | NM_080603 | M-018444-00 |     |  |
| ZWINT  | Cytotoxic | 11130  | NM_007057 | M-006830-00 |     |  |

**Supplementary Table 2**

| <b>Gene Symbol</b> | <b>Score</b> | <b>Entrez Gene ID</b> | <b>Accession #</b> | <b>Catalog #</b> | <b>pSQTQ</b> |
|--------------------|--------------|-----------------------|--------------------|------------------|--------------|
| FLJ21816           | Strong       | 79728                 | NM_024675          | M-012928-00      | YES          |
| MARCH3             | Strong       | 115123                | NM_178450          | M-007116-00      |              |
| ANAPC5             | Medium       | 51433                 | NM_016237          | M-016095-00      |              |
| C13ORF23           | Medium       | 80209                 | NM_025138          | M-012952-00      |              |
| CHEK1              | Medium       | 1111                  | NM_001274          | M-003255-02      | YES          |
| CLIC3              | Medium       | 9022                  | NM_004669          | M-011805-00      |              |
| CNN1               | Medium       | 1264                  | NM_001299          | M-015851-00      |              |
| DKFZP761I1011      | Medium       | 84239                 | NM_032279          | M-023682-00      |              |
| DPF1               | Medium       | 8193                  | NM_004647          | M-031779-00      |              |
| FLJ31846           | Medium       | 160857                | NM_144974          | M-016742-00      |              |
| LOC158381          | Medium       | 158381                | XM_376829          | M-029548-00      |              |
| LOC389329          | Medium       | DC                    | XM_374138          | M-028472-00      |              |
| LOC90139           | Medium       | 90139                 | NM_130783          | M-015297-00      |              |
| NAB1               | Medium       | 4664                  | NM_005966          | M-015359-00      |              |
| PTGFRN             | Medium       | 5738                  | XM_040709          | M-010619-00      |              |
| SWAP70             | Medium       | 23075                 | NM_015055          | M-010323-00      |              |
| WEE1               | Medium       | 7465                  | NM_003390          | M-005050-00      |              |
| ATP1B3             | Weak+        | 483                   | NM_001679          | M-004569-00      |              |
| BBS7               | Weak+        | 55212                 | NM_018190          | M-013346-00      |              |
| BRUNOL6            | Weak+        | 60677                 | NM_052840          | M-015854-00      |              |
| BTBD14A            | Weak+        | 138151                | NM_144653          | M-015957-00      |              |
| C20ORF158          | Weak+        | 85362                 | NM_152302          | M-016827-00      |              |
| C5ORF5             | Weak+        | 51306                 | NM_016603          | M-020738-00      |              |
| CTAG1A             | Weak+        | 246100                | NM_139250          | M-016967-00      |              |
| DKFZP686J0811      | Weak+        | 341640                | XM_292193          | M-021693-00      |              |
| FLJ12606           | Weak+        | 79862                 | NM_024804          | M-014454-00      |              |
| GGPS1              | Weak+        | 9453                  | NM_004837          | M-016477-00      |              |
| GPT2               | Weak+        | 84706                 | NM_133443          | M-004173-01      |              |
| LAMP1              | Weak+        | 3916                  | NM_005561          | M-013481-00      |              |
| LOC388166          | Weak+        | DC                    | XM_370898          | M-030480-00      |              |
| LOC389395          | Weak+        | 389395                | XM_371824          | M-028721-00      |              |
| LOC390377          | Weak+        | DC                    | XM_372486          | M-030242-00      |              |
| LOC90120           | Weak+        | 90120                 | XM_379680          | M-029408-00      |              |
| MGC10992           | Weak+        | 92922                 | NM_033212          | M-015088-00      |              |
| NIT1               | Weak+        | 4817                  | NM_005600          | M-020022-00      |              |
| OPTN               | Weak+        | 10133                 | NM_021980          | M-016269-00      |              |
| SLC31A2            | Weak+        | 1318                  | NM_001860          | M-007532-00      |              |
| SLC39A2            | Weak+        | 29986                 | NM_014579          | M-007570-00      |              |
| ZDHHC1             | Weak+        | 29800                 | NM_013304          | M-014193-00      |              |
| ADAMTS10           | Weak         | 81794                 | NM_030957          | M-005762-00      |              |
| BACE1              | Weak         | 23621                 | NM_012104          | M-003747-00      |              |
| BAT4               | Weak         | 7918                  | NM_033177          | M-013701-00      |              |
| C10ORF75           | Weak         | 90271                 | XM_030445          | M-026305-00      |              |
| C20ORF114          | Weak         | 92747                 | NM_033197          | M-010095-00      |              |
| C21ORF69           | Weak         | 84537                 | NM_058189          | M-015220-00      |              |
| CGI-116            | Weak         | 51019                 | NM_016053          | M-020900-00      |              |
| CNNM1              | Weak         | 26507                 | NM_020348          | M-020830-00      |              |
| COL14A1            | Weak         | 7373                  | XM_044622          | M-025907-00      |              |
| CYP51A1            | Weak         | 1595                  | NM_000786          | M-009215-00      |              |
| DKFZP434L187       | Weak         | 26082                 | XM_375171          | M-030372-00      |              |
| FAM38A             | Weak         | 9780                  | NM_014745          | M-020870-00      |              |
| FLJ12436           | Weak         | 79714                 | NM_024661          | M-016444-00      |              |
| FLJ14154           | Weak         | 79903                 | NM_024845          | M-014479-00      |              |
| FLJ14834           | Weak         | 84935                 | NM_032849          | M-016348-00      |              |
| FLJ20345           | Weak         | 54903                 | NM_017777          | M-020774-00      |              |

|           |      |        |           |             |     |
|-----------|------|--------|-----------|-------------|-----|
| FLJ20694  | Weak | 55018  | NM_017928 | M-020969-00 |     |
| FLJ22573  | Weak | 79713  | NM_024660 | M-014401-00 |     |
| FSHB      | Weak | 2488   | NM_000510 | M-012537-00 |     |
| HIST1H2BF | Weak | 8343   | NM_003522 | M-011442-00 |     |
| HLA-DOB   | Weak | 3112   | NM_002120 | M-011686-00 |     |
| HM13      | Weak | 81502  | NM_030789 | M-005896-01 |     |
| HYAL4     | Weak | 23553  | NM_012269 | M-012447-00 |     |
| KIAA1596  | Weak | 57697  | XM_048128 | M-021955-00 |     |
| KRTAP21-2 | Weak | 337978 | NM_181617 | M-018617-00 |     |
| LOC284207 | Weak | 284207 | XM_209073 | M-022983-00 |     |
| LOC285908 | Weak | 285908 | NM_181722 | M-018928-00 |     |
| LOC399924 | Weak | DC     | XM_378301 | M-029911-00 |     |
| LOC402560 | Weak | DC     | XM_380127 | M-031802-00 |     |
| LOC87769  | Weak | 87769  | XM_373431 | M-030187-00 |     |
| LOC90525  | Weak | 90525  | XM_032304 | M-022237-00 |     |
| LSM6      | Weak | 11157  | NM_007080 | M-019754-00 |     |
| MGC11266  | Weak | 79172  | NM_024322 | M-014339-00 |     |
| MGC15429  | Weak | 84836  | NM_032750 | M-009831-00 |     |
| MGC22960  | Weak | 387338 | NM_199044 | M-027291-00 |     |
| MGC61550  | Weak | 348110 | NM_182616 | M-018687-00 |     |
| PNPLA1    | Weak | 285848 | NM_173676 | M-009042-00 |     |
| PNUTL2    | Weak | 5414   | NM_004574 | M-011886-00 |     |
| POLK      | Weak | 51426  | NM_016218 | M-021038-00 |     |
| PRSS22    | Weak | 64063  | NM_022119 | M-006013-00 |     |
| RABGGTA   | Weak | 5875   | NM_004581 | M-005097-00 |     |
| RBPSUHL   | Weak | 11317  | NM_014276 | M-012504-00 |     |
| RCD-8     | Weak | 23644  | NM_014329 | M-016635-00 | YES |
| RGMB      | Weak | 285704 | NM_173670 | M-018102-00 |     |
| RNF10     | Weak | 9921   | NM_014868 | M-006918-00 |     |
| SEC14L4   | Weak | 284904 | NM_174977 | M-019246-00 |     |
| SEZ6      | Weak | 124925 | NM_178860 | M-008080-00 |     |
| SLBP      | Weak | 7884   | NM_006527 | M-012286-00 |     |
| SLC39A3   | Weak | 29985  | NM_144564 | M-007571-00 |     |
| SON       | Weak | 6651   | NM_003103 | M-012983-00 |     |
| SYTL3     | Weak | 94120  | XM_087804 | M-004544-00 |     |
| TKTL1     | Weak | 8277   | NM_012253 | M-004736-00 |     |
| TLL2      | Weak | 7093   | NM_012465 | M-006047-01 |     |
| TSPY2     | Weak | 64591  | NM_022573 | M-014173-00 |     |
| UCN2      | Weak | 90226  | NM_033199 | M-018173-00 |     |
| WDR20     | Weak | 91833  | NM_144574 | M-021318-00 |     |
| ZMYND12   | Weak | 84217  | NM_032257 | M-015735-00 |     |
| ZNF226    | Weak | 7769   | NM_015919 | M-019147-00 |     |
| ZNF441    | Weak | 126068 | NM_152355 | M-016909-00 |     |

Supplementary Table 3

| Gene Symbol | Entrez Gene ID | Accession | # checkpoint siRNAs | Secondary Score                      | MI Untreated | MMC Sensitivity          | Catalog Number | Sequence | Primary Score    | Cytotoxic Score | pSQTQ |
|-------------|----------------|-----------|---------------------|--------------------------------------|--------------|--------------------------|----------------|----------|------------------|-----------------|-------|
| ATR         | 545            | NM_001184 | 4                   | Strong<br>Strong<br>Medium<br>Strong |              | YES<br>YES<br>YES<br>YES | D-003202-05    | GAACAACA | Strong           |                 |       |
|             |                |           |                     |                                      |              |                          | D-003202-10    | GGUCAGC  |                  |                 |       |
|             |                |           |                     |                                      |              |                          | D-003202-17    | GCAACUCG |                  |                 |       |
|             |                |           |                     |                                      |              |                          | D-003202-18    | ACUGAUG  |                  |                 |       |
| BRCA2       | 675            | NM_000059 | 4                   | Medium<br>Medium<br>Medium<br>Strong |              | YES<br>YES<br>YES<br>YES | D-003462-01    | GAAACGG  | Medium           |                 | YES   |
|             |                |           |                     |                                      |              |                          | D-003462-02    | GUAAGA   |                  |                 |       |
|             |                |           |                     |                                      |              |                          | D-003462-03    | GGUAUCA  |                  |                 |       |
|             |                |           |                     |                                      |              |                          | D-003462-04    | GAAGAAU  |                  |                 |       |
| CHEK1       | 1111           | NM_001274 | 4                   | Medium<br>Weak+<br>Strong<br>Medium  |              | YES<br>YES<br>YES<br>YES | D-003255-06    | GCAACAG  | Cytotoxic Bypass | Medium          | YES   |
|             |                |           |                     |                                      |              |                          | D-003255-07    | GGACUUC  |                  |                 |       |
|             |                |           |                     |                                      |              |                          | D-003255-08    | AAAGAUAC |                  |                 |       |
|             |                |           |                     |                                      |              |                          | D-003255-09    | CCACAUG  |                  |                 |       |
| FLJ21816    | 79728          | NM_024675 | 4                   | Medium<br>Strong<br>Weak<br>Medium   |              | YES<br>YES<br>YES<br>YES | D-012928-01    | GAAGCAA  | Cytotoxic Bypass | Strong          | YES   |
|             |                |           |                     |                                      |              |                          | D-012928-02    | GAUAAUG  |                  |                 |       |
|             |                |           |                     |                                      |              |                          | D-012928-03    | GCAGUGA  |                  |                 |       |
|             |                |           |                     |                                      |              |                          | D-012928-04    | GAAGUCA  |                  |                 |       |
| MBTPS1      | 8720           | NM_003791 | 4                   | Weak+<br>Weak<br>Weak<br>Weak        |              |                          | D-005939-02    | GCAGUGA  | Medium           |                 |       |
|             |                |           |                     |                                      |              |                          | D-005939-04    | GAAUAAC  |                  |                 |       |
|             |                |           |                     |                                      |              |                          | D-005939-05    | GGAAUUA  |                  |                 |       |
|             |                |           |                     |                                      |              |                          | D-005939-06    | AAAGAAG  |                  |                 |       |
| ABTB2       | 25841          | NM_145804 | 3                   | Weak<br>Weak<br>Weak<br>Weak         |              | YES<br>YES<br>YES<br>YES | D-016671-01    | GAAUGAC  | Medium           |                 |       |
|             |                |           |                     |                                      |              |                          | D-016671-02    | ACUAUGA  |                  |                 |       |
|             |                |           |                     |                                      |              |                          | D-016671-03    | GCACUGG  |                  |                 |       |
|             |                |           |                     |                                      |              |                          | D-016671-04    | CUACAAU  |                  |                 |       |
| C20ORF53    | 140826         | NM_178472 | 3                   | Weak<br>Weak<br>Medium               |              | YES<br>YES<br>YES<br>YES | D-018137-01    | CCGAUGA  | Weak+            |                 |       |
|             |                |           |                     |                                      |              |                          | D-018137-02    | AGACAUC  |                  |                 |       |
|             |                |           |                     |                                      |              |                          | D-018137-03    | CUGCCUG  |                  |                 |       |
|             |                |           |                     |                                      |              |                          | D-018137-04    | AGAUAGG  |                  |                 |       |
| C6ORF211    | 79624          | NM_024573 | 3                   | Weak<br>Weak<br>Weak                 |              | YES<br>YES<br>YES<br>YES | D-014372-01    | GCACCAU  | Strong           |                 |       |
|             |                |           |                     |                                      |              |                          | D-014372-02    | GGUUGCA  |                  |                 |       |
|             |                |           |                     |                                      |              |                          | D-014372-03    | GCUACUA  |                  |                 |       |
|             |                |           |                     |                                      |              |                          | D-014372-04    | UCAGAAU  |                  |                 |       |
| CDS1        | 1040           | NM_001263 | 3                   | Medium<br>Weak<br>Weak               |              | YES<br>YES<br>YES<br>YES | D-008680-01    | GCAAUGA  | Medium           |                 |       |
|             |                |           |                     |                                      |              |                          | D-008680-02    | UGACAGA  |                  |                 |       |
|             |                |           |                     |                                      |              |                          | D-008680-03    | GUUCCAA  |                  |                 |       |
|             |                |           |                     |                                      |              |                          | D-008680-04    | UAACUAU  |                  |                 |       |
| CLOCK       | 9575           | NM_004898 | 3                   | Medium<br>Weak<br>Weak<br>Weak       |              | YES<br>YES<br>YES<br>YES | D-008212-01    | CAAAGAA  | Medium           |                 |       |
|             |                |           |                     |                                      |              |                          | D-008212-02    | GCUGGAA  |                  |                 |       |
|             |                |           |                     |                                      |              |                          | D-008212-03    | GGCAAAU  |                  |                 |       |
|             |                |           |                     |                                      |              |                          | D-008212-04    | GAGUUUA  |                  |                 |       |
| DNMT3B      | 1789           | NM_006892 | 3                   | Weak+<br>Weak<br>Weak<br>Weak        |              | YES<br>YES<br>YES<br>YES | D-006395-01    | GAAAGUA  | Medium           |                 |       |
|             |                |           |                     |                                      |              |                          | D-006395-04    | ACAAAUG  |                  |                 |       |
|             |                |           |                     |                                      |              |                          | D-006395-05    | GCUCUUA  |                  |                 |       |
|             |                |           |                     |                                      |              |                          | D-006395-06    | UUUACCA  |                  |                 |       |
| FANCL       | 55120          | NM_018062 | 3                   | Weak<br>Weak<br>Weak+<br>Medium      |              | YES<br>YES<br>YES<br>YES | D-021486-01    | GAAGUUG  | Medium           |                 |       |
|             |                |           |                     |                                      |              |                          | D-021486-02    | GCGGAUA  |                  |                 |       |
|             |                |           |                     |                                      |              |                          | D-021486-03    | GAACAUAC |                  |                 |       |
|             |                |           |                     |                                      |              |                          | D-021486-04    | GAUAGGA  |                  |                 |       |

|           |        |           |   |                                  |  |                   |                                                          |                                              |           |      |  |
|-----------|--------|-----------|---|----------------------------------|--|-------------------|----------------------------------------------------------|----------------------------------------------|-----------|------|--|
| FLJ25955  | 164781 | NM_178821 | 3 | Weak<br>Weak<br>Medium           |  |                   | D-017857-01<br>D-017857-02<br>D-017857-03<br>D-017857-04 | GGAUUGC<br>CGAGGAA<br>GGAUAAU<br>GCCACUG     | Weak+     |      |  |
| FLJ36561  | 150248 | NM_182520 | 3 | Weak<br>Weak<br>Medium           |  | YES<br>YES        | D-018678-01<br>D-018678-02<br>D-018678-03<br>D-018678-04 | GGGCACA<br>GAACCUG<br>GCAGGUG<br>GAGCAAA     | Medium    |      |  |
| HPS3      | 84343  | NM_032383 | 3 | Weak+<br>Weak<br>Medium          |  |                   | D-017309-01<br>D-017309-02<br>D-017309-03<br>D-017309-04 | GACCAGAI<br>CGAGAGAI<br>GCAUAGAI<br>CGUCCUAI | Weak+     |      |  |
| IL13RA1   | 3597   | NM_001560 | 3 | Weak+<br>Weak<br>Weak            |  | YES               | D-007933-02<br>D-007933-03<br>D-007933-04<br>D-007933-05 | GAAUACA<br>GAAACUC<br>CCACAAU<br>CAAGAAAL    | Medium    |      |  |
| KIAA1596  | 57697  | XM_048128 | 3 | Weak+<br>Medium<br>Weak+         |  | YES<br>YES<br>YES | D-021955-01<br>D-021955-02<br>D-021955-03<br>D-021955-04 | GUACUGC<br>CAAACCA<br>CAACAGU<br>GAACAAG     | Cytotoxic | Weak |  |
| KIAA1679  | 80731  | XM_046570 | 3 | Medium<br>Weak<br>Weak+          |  | YES               | D-022909-01<br>D-022909-02<br>D-022909-03<br>D-022909-04 | GAGCAUC<br>CAACUGG<br>CGGACUC<br>GUGGAGC     | Medium    |      |  |
| LCT       | 3938   | NM_002299 | 3 | Weak+<br>Weak+<br>Weak+          |  | YES<br>YES        | D-011717-01<br>D-011717-02<br>D-011717-03<br>D-011717-04 | GGAGUGC<br>GCUACCA<br>UCUACUA<br>AGUCAGAI    | Medium    |      |  |
| LIPA      | 3988   | NM_000235 | 3 | Medium<br>Weak+<br>Weak          |  | YES<br>YES        | D-004043-01<br>D-004043-02<br>D-004043-04<br>D-004043-05 | GAACCAU<br>GGCCAAA<br>GACCUAC<br>CAAAUUAC    | Strong    |      |  |
| LOC128710 | 128710 | XM_059267 | 3 | Weak+<br>Weak<br>Weak<br>Weak    |  | YES<br>YES        | D-024240-01<br>D-024240-02<br>D-024240-03<br>D-024240-04 | GGAACAI<br>GGUUUUG<br>CGAGAGA<br>AUACGAA     | Weak+     |      |  |
| LOC150759 | 150759 | NM_175853 | 3 | Medium<br>Weak<br>Weak<br>Medium |  | YES<br>YES        | D-017982-01<br>D-017982-02<br>D-017982-03<br>D-017982-04 | GACAAAG<br>GAAACAA<br>ACACUUC<br>GAUCUAC     | Strong    |      |  |
| LOC151256 | 151256 | XM_087141 | 3 | Weak<br>Weak<br>Medium           |  | YES<br>YES        | D-023117-01<br>D-023117-02<br>D-023117-03<br>D-023117-04 | GAGCAGC<br>GCAAUAU<br>CCUAAGA<br>GACAGUA     | Medium    |      |  |
| LOC285045 | 285045 | XM_379086 | 3 | Medium<br>Weak<br>Medium         |  | YES<br>YES<br>YES | D-027824-01<br>D-027824-02<br>D-027824-03<br>D-027824-04 | GAAGGCA<br>CAACUUG<br>AACAGUG<br>GCUGGGA     | Weak+     |      |  |
| LOC339896 | 339896 | NM_207359 | 3 | Medium<br>Weak<br>Weak           |  |                   | D-023510-01<br>D-023510-02<br>D-023510-03<br>D-023510-04 | AGACAAU<br>UAAUCGU<br>UCGCCAA<br>GCAGAAI     | Weak+     |      |  |

|           |        |           |   |                                    |                          |                                                          |                                           |                  |        |  |
|-----------|--------|-----------|---|------------------------------------|--------------------------|----------------------------------------------------------|-------------------------------------------|------------------|--------|--|
| LOC389101 | 389101 | XM_371622 | 3 | Medium<br>Weak                     | YES                      | D-028088-01<br>D-028088-02<br>D-028088-03<br>D-028088-04 | CCACUAC<br>GCUCCAA<br>GUCACAA<br>AAAGAUG  | Strong           |        |  |
| LOC389250 | 389250 | XM_374101 | 3 | Weak<br>Weak<br>Weak+              | YES                      | D-028302-01<br>D-028302-02<br>D-028302-03<br>D-028302-04 | GCGACUA<br>AGGAAAC<br>GGGACCA<br>GGAGAGU  | Medium           |        |  |
| LOC389329 | 389329 | XM_374138 | 3 | Weak<br>Weak<br>Medium             | YES                      | D-028472-01<br>D-028472-02<br>D-028472-03<br>D-028472-04 | GCACAGA<br>AAACAUG<br>UGACAAU<br>GUGUAGA  | Cytotoxic Bypass | Medium |  |
| LOC399818 | 399818 | NM_212554 | 3 | Weak<br>Weak+<br>Weak              | YES                      | D-032543-01<br>D-032543-02<br>D-032543-03<br>D-032543-04 | GAGUAUG<br>CCAUAAG<br>GAGGAAG<br>CCGAGAA  | Medium           |        |  |
| LOC400526 | 400526 | XM_375344 | 3 | Medium<br>Medium<br>Medium<br>Weak | YES<br>YES               | D-030743-01<br>D-030743-02<br>D-030743-03<br>D-030743-04 | GUCAAGA<br>UAACAAAC<br>UCCCAGA<br>UGAGAAA | Strong           |        |  |
| LOC90120  | 90120  | XM_379680 | 3 | Weak<br>Weak+<br>Weak<br>Weak+     | YES<br>YES<br>YES<br>YES | D-029408-01<br>D-029408-02<br>D-029408-03<br>D-029408-04 | ACAACAAC<br>UACUUUA<br>GGUCUUC<br>UCAAGAC | Cytotoxic Bypass | Weak+  |  |
| MGC16943  | 112479 | NM_080663 | 3 | Weak<br>Weak+<br>Weak+             |                          | D-015252-01<br>D-015252-02<br>D-015252-03<br>D-015252-04 | GAUCAGA<br>UACAAUG<br>CCAAGCA<br>CGGCAGC  | Strong           |        |  |
| MLANA     | 2315   | NM_005511 | 3 | Weak<br>Weak+<br>Weak              | YES<br>YES               | D-012715-01<br>D-012715-02<br>D-012715-03<br>D-012715-04 | GAAACUC<br>CCA AUGC<br>ACAAGAA<br>GCUCAUC | Medium           |        |  |
| MYO10     | 4651   | NM_012334 | 3 | Weak<br>Weak<br>Weak               | YES                      | D-007217-01<br>D-007217-02<br>D-007217-03<br>D-007217-04 | GGAAAGG<br>GGACAUA<br>CGUCGUA<br>GAGAAGA  | Medium           |        |  |
| NRF1      | 4899   | NM_005011 | 3 | Weak+<br>Medium<br>Weak            |                          | D-017924-01<br>D-017924-02<br>D-017924-03<br>D-017924-04 | GCAAGUG<br>UAGUAUA<br>AACCUAAC<br>CGGAAAC | Strong           |        |  |
| NUBP2     | 10101  | NM_012225 | 3 | Medium<br>Weak<br>Medium           |                          | D-004705-01<br>D-004705-02<br>D-004705-03<br>D-004705-04 | GAGCUGA<br>GCAUCUC<br>GCAAGAA<br>GGAGUGC  | Strong           |        |  |
| PAPLN     | 89932  | XM_370765 | 3 | Weak<br>Weak+                      | YES<br>YES               | D-030307-01<br>D-030307-02<br>D-030307-03<br>D-030307-04 | GCACGCU<br>AGACCAA<br>CAGUUUG<br>CGGCCAG  | Weak             |        |  |
| SHFM1     | 7979   | NM_006304 | 3 | Medium<br>Weak<br>Strong           | YES                      | D-021353-01<br>D-021353-02<br>D-021353-03<br>D-021353-04 | GCACAUG<br>GUUAUAA<br>AGACUGG<br>CAAUGUA  | Medium           |        |  |



|          |        |           |   |                          |                   |                                                          |                                           |                  |               |     |
|----------|--------|-----------|---|--------------------------|-------------------|----------------------------------------------------------|-------------------------------------------|------------------|---------------|-----|
| SYT14L   | 83851  | NM_031914 | 3 | Weak<br>Medium           | YES<br>YES<br>YES | D-014750-01<br>D-014750-02<br>D-014750-03<br>D-014750-04 | CAACUAC<br>ACACUUU<br>GACCGCA<br>U AACAGG | Weak+            |               |     |
| ABHD3    | 171586 | NM_138340 | 2 | Weak<br>Medium           | YES               | D-008587-01<br>D-008587-02<br>D-008587-03<br>D-008587-04 | CCACUGA<br>GUACAGG<br>CACCAGA<br>UCACUGG  | Weak             |               |     |
| ADAMTS16 | 170690 | NM_139056 | 2 | Medium<br>Weak<br>Medium | YES<br>YES        | D-005767-01<br>D-005767-02<br>D-005767-04<br>D-005767-05 | GAACAGA<br>GAGGAUA<br>CAUAAGC<br>GGACUGG  | Medium           |               |     |
| AKAP8    | 10270  | NM_005858 | 2 | Weak+                    | YES<br>YES        | D-009656-02<br>D-009656-03<br>D-009656-04<br>D-009656-05 | GGAACGA<br>GAACAAC<br>GAAUUC<br>GCAGGAA   | Weak+            |               |     |
| ALS2CR8  | 79800  | NM_024744 | 2 | Weak<br>Weak             | YES               | D-015280-01<br>D-015280-02<br>D-015280-03<br>D-015280-04 | GGACAGG<br>CAUUAAG<br>GUAAUGG<br>GUUCUUA  | Weak+            |               |     |
| APT X    | 54840  | NM_175069 | 2 | Weak<br>Medium           | YES<br>YES        | D-013368-01<br>D-013368-02<br>D-013368-03<br>D-013368-04 | GAA AUGU<br>AAUCAGA<br>CCAAAGG<br>AGGGAUA | Weak+            |               |     |
| ASB17    | 127247 | NM_080868 | 2 | Medium<br>Weak<br>Medium |                   | D-015284-01<br>D-015284-02<br>D-015284-03<br>D-015284-04 | GAACUUU<br>GGAUUUC<br>AAUGGUU<br>UCACAGU  | Strong           |               |     |
| ASH2L    | 9070   | NM_004674 | 2 | Medium<br>Weak+          | YES<br>YES        | D-019831-01<br>D-019831-02<br>D-019831-03<br>D-019831-04 | AAAGAUG<br>UAACAUU<br>AGAGAUG<br>UGAUCGA  | Medium           |               |     |
| ATBF1    | 463    | NM_006885 | 2 | Weak<br>Medium           |                   | D-015412-01<br>D-015412-02<br>D-015412-03<br>D-015412-04 | GAACAAG<br>CCACUAU<br>GGACGGC<br>GUACAGA  | Weak             |               | YES |
| ATP13A4  | 84239  | NM_032279 | 2 | Weak<br>Weak+            | YES<br>YES<br>YES | D-023682-01<br>D-023682-02<br>D-023682-03<br>D-023682-04 | GCAUUUC<br>UCAAGGA<br>GCACGUA<br>GUAGUUA  | Cytotoxic Bypass | Medium        |     |
| ATP1B3   | 483    | NM_001679 | 2 | Weak+<br>Medium          | YES<br>YES        | D-004569-01<br>D-004569-02<br>D-004569-03<br>D-004569-04 | GGAAAGA<br>GAACAGA<br>GCAUGUC<br>GAAGAUU  | Cytotoxic Bypass | Weak+         |     |
| AZI1     | 22994  | XM_045581 | 2 | Weak+<br>Weak<br>Medium  | YES<br>YES<br>YES | D-023335-01<br>D-023335-02<br>D-023335-03<br>D-023335-04 | CAACUUC<br>UCUGACA<br>GGAGGUC<br>GGACAGG  | Cytotoxic        | Did not score | YES |
| BRE      | 9577   | NM_004899 | 2 | Medium<br>Medium         | YES<br>YES        | D-010210-02<br>D-010210-03<br>D-010210-04<br>D-010210-05 | CAACUGG<br>GCACAGG<br>GAGAGUA<br>GUACGUG  | Medium           |               |     |

|           |        |           |   |                        |           |                   |                                                          |                                            |                  |               |     |
|-----------|--------|-----------|---|------------------------|-----------|-------------------|----------------------------------------------------------|--------------------------------------------|------------------|---------------|-----|
| BRIP1     | 83990  | NM_032043 | 2 | Medium<br>Weak+        |           | YES<br>YES        | D-010587-01<br>D-010587-02<br>D-010587-03<br>D-010587-04 | GAACAGA<br>GAUGAUC<br>GGAAAUAG<br>GAACUUG  | Medium           |               |     |
| C13ORF23  | 80209  | NM_025138 | 2 | Weak<br>Weak+          |           | YES<br>YES        | D-012952-01<br>D-012952-02<br>D-012952-03<br>D-012952-04 | CAACCCGA<br>UAACAAUC<br>GCACAAG<br>GACAUUG | Cytotoxic Bypass | Medium        |     |
| C14ORF150 | 112840 | NM_080666 | 2 | Weak+                  |           | YES<br>YES        | D-015254-01<br>D-015254-02<br>D-015254-03<br>D-015254-04 | GAGUACG<br>GAGAAGA<br>GGUAUAG<br>GGUUAAA   | Weak             |               |     |
| C14ORF160 | 79944  | NM_024884 | 2 | Weak+                  |           |                   | D-008130-01<br>D-008130-02<br>D-008130-03<br>D-008130-04 | GGAGAAA<br>GAAAUUC<br>GCAGGUG<br>GGAAAUUC  | Weak+            |               |     |
| C14ORF25  | 319089 | XM_375077 | 2 | Medium<br>Weak         |           | YES<br>YES        | D-021942-01<br>D-021942-02<br>D-021942-03<br>D-021942-04 | GGCCAGA<br>GGAAAGUA<br>AGAGGAA<br>UGAGAAA  | Medium           |               |     |
| C1ORF54   | 79630  | NM_024579 | 2 | Medium<br>Medium       |           | YES<br>YES        | D-014374-01<br>D-014374-02<br>D-014374-03<br>D-014374-04 | GCAAUAG<br>AUUAUCA<br>GAACCUA<br>CAGAUUU   | Medium           |               |     |
| C20ORF158 | 85362  | NM_152302 | 2 | Medium<br>Weak<br>Weak |           | YES<br>YES<br>YES | D-016827-01<br>D-016827-02<br>D-016827-03<br>D-016827-04 | GCCAAGC<br>CAACAUG<br>CGCAAGG<br>CCUGCAG   | Cytotoxic Bypass | Weak+         |     |
| C21ORF130 | 284835 | XM_379011 | 2 | Weak<br>Medium         |           | YES<br>YES        | D-031382-01<br>D-031382-02<br>D-031382-03<br>D-031382-04 | AAACCGG<br>CCGAGUC<br>GCCGAGA<br>CCAAGUG   | Weak+            |               |     |
| CCNE1     | 898    | NM_001238 | 2 | Weak                   |           | YES<br>YES<br>YES | D-003213-06<br>D-003213-07<br>D-003213-08<br>D-003213-09 | GGAAAUUC<br>GGAGGUG<br>CUAAAUG<br>GUAUAUG  | Cytotoxic        | Did not score | YES |
| CDC37     | 11140  | NM_007065 | 2 | Weak<br>Medium         |           | YES               | D-003231-05<br>D-003231-06<br>D-003231-07<br>D-003231-08 | GCGAGGA<br>CACAAGA<br>ACAAUCG<br>GAGGAGA   | Medium           |               |     |
| CDH17     | 1015   | NM_004063 | 2 | Weak<br>Weak           |           | YES               | D-011829-01<br>D-011829-02<br>D-011829-03<br>D-011829-04 | CCAUUGG<br>GAACCGA<br>AACCUAUC<br>GUACGAA  | Medium           |               |     |
| CKS2      | 1164   | NM_001827 | 2 | Weak<br>Weak<br>Weak   |           |                   | D-007678-01<br>D-007678-02<br>D-007678-03<br>D-007678-04 | GGACAAG<br>CCACAUU<br>UCGACGA<br>GUACCGG   | Medium           |               |     |
| CLIC3     | 9022   | NM_004669 | 2 | Weak+                  | untreated | YES<br>YES        | D-011805-01<br>D-011805-02<br>D-011805-03<br>D-011805-04 | GGAGAAA<br>GCACAUUC<br>AGACAGA<br>CGGACGU  | Cytotoxic Bypass | Medium        |     |

|              |        |           |   |                          |           |                   |                                                          |                                              |                  |               |     |
|--------------|--------|-----------|---|--------------------------|-----------|-------------------|----------------------------------------------------------|----------------------------------------------|------------------|---------------|-----|
| CPSF2        | 53981  | NM_017437 | 2 | Weak+<br>Medium          |           | YES<br>YES        | D-013404-01<br>D-013404-02<br>D-013404-03<br>D-013404-04 | UAUGAUAA<br>GAUCAGAA<br>UUGGAUAA<br>GAACUGUA | Weak+            |               |     |
| CYP11A1      | 1583   | NM_000781 | 2 | Weak<br>Medium           |           | YES<br>YES<br>YES | D-008329-01<br>D-008329-02<br>D-008329-03<br>D-008329-04 | GUAAAUGA<br>GGCUAAA<br>GAAGUGU<br>GAUGUGG    | Medium           |               |     |
| DJ159A19.3   | 27245  | XM_372774 | 2 | Weak<br>Weak             |           | YES<br>YES        | D-027522-01<br>D-027522-02<br>D-027522-03<br>D-027522-04 | GUACAGG<br>GGACAA<br>CCGGUGA<br>GAAGGCA      | Cytotoxic        | Did not score | YES |
| DKFZP434B168 | 25896  | NM_015434 | 2 | Weak+<br>Medium          | untreated | YES               | D-013972-01<br>D-013972-02<br>D-013972-03<br>D-013972-04 | CAACUUA<br>GAAGAAU<br>UCAAGAC<br>GCGUUUU     | Medium           |               |     |
| DKFZP564D137 | 84064  | NM_032124 | 2 | Weak                     |           | YES<br>YES        | D-018592-01<br>D-018592-02<br>D-018592-03<br>D-018592-04 | UGAGGAG<br>GGAAUUA<br>GAGCAAG<br>UUACUUA     | Medium           |               |     |
| DMC1         | 11144  | NM_007068 | 2 | Medium<br>Medium         |           | YES<br>YES        | D-009551-01<br>D-009551-02<br>D-009551-03<br>D-009551-04 | GGACAUU<br>CCAGGAA<br>GUAGGAA<br>GAAGGAG     | Medium           |               |     |
| DOCK11       | 139818 | NM_144658 | 2 | Weak<br>Weak             |           | YES<br>YES        | D-015696-01<br>D-015696-02<br>D-015696-03<br>D-015696-04 | UAAAUGA<br>GAUCAAC<br>CGACAGA<br>CGAAACAC    | Cytotoxic Bypass | Did not score | YES |
| EPHB3        | 2049   | NM_004443 | 2 | Weak<br>Weak             |           | YES<br>YES        | D-003123-09<br>D-003123-10<br>D-003123-11<br>D-003123-12 | GGAUGA<br>GAUCCUA<br>GAAGACCU<br>CACAAUAA    | Medium           |               |     |
| EPHB4        | 2050   | NM_004444 | 2 | Weak<br>Weak+            |           | YES               | D-003124-05<br>D-003124-06<br>D-003124-07<br>D-003124-08 | GGACAAA<br>GUACUAA<br>GGAGAGA<br>GCCAAUA     | Medium           |               |     |
| ERCC5        | 2073   | NM_000123 | 2 | Weak+<br>Weak            |           | YES<br>YES        | D-006626-01<br>D-006626-02<br>D-006626-03<br>D-006626-04 | CAUGAAU<br>GAACGCA<br>GAAAGAA<br>GAACGAA     | Medium           |               |     |
| FAM21C       | 253725 | XM_350780 | 2 | Weak-<br>Medium<br>Weak+ |           |                   | D-029678-01<br>D-029678-02<br>D-029678-03<br>D-029678-04 | CAAAGGA<br>GAACUUA<br>AAGUAGA<br>GAACAA      | Weak+            |               |     |
| FANCE        | 2178   | NM_021922 | 2 | Weak                     |           | YES               | D-013991-01<br>D-013991-02<br>D-013991-03<br>D-013991-04 | CAACUGC<br>GGAGAGA<br>CCAAGUA<br>CGAAUCU     | Weak+            |               |     |
| FERD3L       | 222894 | NM_152898 | 2 | Weak+<br>Medium          |           | YES<br>YES<br>YES | D-008437-01<br>D-008437-02<br>D-008437-03<br>D-008437-04 | GAAGAGG<br>CACGUUU<br>ACACUAC<br>GUCUAUA     | Weak+            |               |     |

|          |        |           |   |                              |  |                   |                                                          |                                           |           |               |     |
|----------|--------|-----------|---|------------------------------|--|-------------------|----------------------------------------------------------|-------------------------------------------|-----------|---------------|-----|
| FKBP5    | 2289   | NM_004117 | 2 | Weak+<br>Weak                |  | YES<br>YES<br>YES | D-004224-01<br>D-004224-02<br>D-004224-04<br>D-004224-05 | GAUGGAA<br>AGAUUGA<br>GGAGAGG<br>GACCACG  | Weak      |               | YES |
| FLJ20534 | 54969  | NM_017867 | 2 | Weak+<br>Medium<br>Weak      |  | YES               | D-020849-01<br>D-020849-02<br>D-020849-03<br>D-020849-04 | AAAGCCA<br>GAGUUC<br>AAUCAAC<br>AGGCUUG   | Weak+     |               |     |
| FLJ22729 | 79736  | NM_024683 | 2 | Weak<br>Weak<br>Weak         |  | YES               | D-014410-01<br>D-014410-02<br>D-014410-03<br>D-014410-04 | UAGAAGA<br>GAAGAGA<br>CAUGCUG<br>UACAAGC  | Weak+     |               |     |
| FLJ23703 | 200197 | NM_182534 | 2 | Weak+<br>Weak<br>Weak        |  | YES               | D-018885-01<br>D-018885-02<br>D-018885-03<br>D-018885-04 | GAACCUU<br>GAACAUC<br>CUUCUUA<br>GUGUACA  | Medium    |               |     |
| FLJ25224 | 120406 | NM_182495 | 2 | Weak+<br>Weak<br>Weak        |  | YES               | D-018588-01<br>D-018588-02<br>D-018588-03<br>D-018588-04 | UGCCAU<br>GAACUUA<br>CAUAGGA<br>CCACAUG   | Medium    |               |     |
| FLJ33977 | 285605 | NM_173666 | 2 | Weak<br>Weak<br>Weak<br>Weak |  |                   | D-018032-01<br>D-018032-02<br>D-018032-03<br>D-018032-04 | CCGGAAG<br>GGACAAG<br>GCGUACA<br>CGGAUGC  | Weak+     |               |     |
| FLJ37874 | 338699 | NM_182603 | 2 | Medium<br>Medium             |  | YES               | D-018873-01<br>D-018873-02<br>D-018873-03<br>D-018873-04 | GAUCAAC<br>UAAAUGG<br>GAAUGGA<br>UGCCAAG  | Medium    |               |     |
| FLJ42393 | 401105 | NM_207488 | 2 | Weak<br>Weak<br>Weak         |  | YES               | D-032177-01<br>D-032177-02<br>D-032177-03<br>D-032177-04 | GCUCUCA<br>GUGAAGA<br>CUCCAAG<br>GCCUUCA  | Medium    |               |     |
| FLJ45645 | 375287 | NM_198557 | 2 | Medium<br>Medium             |  | YES               | D-027267-01<br>D-027267-02<br>D-027267-03<br>D-027267-04 | GGACACA<br>UGAAAGA<br>GGGAGUU<br>GAAUGAG  | Weak+     |               |     |
| FLJ46111 | 283102 | NM_198473 | 2 | Weak+<br>Medium<br>Weak      |  |                   | D-027228-01<br>D-027228-02<br>D-027228-03<br>D-027228-04 | GGA AUGA<br>ACAAGGA<br>GAGCUGG<br>GAGAUUA | Weak+     |               |     |
| FLJ46365 | 401459 | NM_207504 | 2 | Weak<br>Weak                 |  | YES<br>YES<br>YES | D-032187-01<br>D-032187-02<br>D-032187-03<br>D-032187-04 | GAACUGU<br>CAGCUAA<br>GGUCACC<br>CUGACAC  | Medium    |               |     |
| FLJ90805 | 284339 | NM_173633 | 2 | Weak<br>Weak                 |  | YES               | D-018209-01<br>D-018209-02<br>D-018209-03<br>D-018209-04 | GGACUUC<br>CCGCUCA<br>GAUUAUU<br>CCGUGAA  | Weak+     |               |     |
| GARNL1   | 253959 | XM_210022 | 2 | Weak<br>Weak                 |  |                   | D-021937-01<br>D-021937-02<br>D-021937-03<br>D-021937-04 | GAAACA<br>UGAAUA<br>GCACAAA<br>GGACCAA    | Cytotoxic | Did not score | YES |

|           |        |           |   |                        |  |                          |                                                          |                                           |                  |               |     |
|-----------|--------|-----------|---|------------------------|--|--------------------------|----------------------------------------------------------|-------------------------------------------|------------------|---------------|-----|
| HAVCR1    | 26762  | NM_012206 | 2 | Weak<br>Medium<br>Weak |  |                          | D-019856-01<br>D-019856-03<br>D-019856-04<br>D-019856-05 | GGACACA<br>UUUAGCA<br>CGACGAC<br>GGUCACG  | Medium           |               |     |
| HCCA2     | 81532  | NM_053005 | 2 | Medium                 |  | YES<br>YES<br>YES<br>YES | D-019362-01<br>D-019362-02<br>D-019362-03<br>D-019362-04 | GAUACCC<br>ACAUCAAC<br>GAGCACA<br>GAGAUUG | Medium           |               |     |
| HIST1H2BH | 8345   | NM_003524 | 2 | Weak+<br>Weak+         |  | YES                      | D-011444-01<br>D-011444-02<br>D-011444-03<br>D-011444-04 | GGACGCA<br>UAAAUGG<br>AUAAAUG<br>GCUCAUU  | Medium           |               |     |
| HTR2B     | 3357   | NM_000867 | 2 | Weak+<br>Medium        |  | YES<br>YES               | D-005639-01<br>D-005639-05<br>D-005639-06<br>D-005639-07 | GAAGAAG<br>CAAGAAA<br>CGAUUAU<br>AGAGCGA  | Strong           |               |     |
| IL16      | 3603   | NM_004513 | 2 | Medium<br>Weak         |  | YES                      | D-007936-01<br>D-007936-02<br>D-007936-03<br>D-007936-05 | AGAAUCA<br>CCAGCAA<br>CGCCAAA<br>GAAGGGC  | Medium           |               |     |
| IMP5      | 162540 | NM_175882 | 2 | Weak<br>Weak           |  | YES                      | D-005928-01<br>D-005928-02<br>D-005928-03<br>D-005928-04 | GGGCAGA<br>GACCCAG<br>GCGCAAC<br>GGACAUC  | Medium           |               |     |
| JM11      | 90060  | NM_033626 | 2 | Weak<br>Weak           |  | YES<br>YES               | D-015130-01<br>D-015130-02<br>D-015130-03<br>D-015130-04 | GAAACCA<br>GGACGUA<br>GCCUGA<br>GAAGUCA   | Weak             |               | YES |
| KAB       | 9859   | NM_014812 | 2 | Weak<br>Medium         |  | YES<br>YES<br>YES        | D-021258-01<br>D-021258-02<br>D-021258-03<br>D-021258-04 | GAAGUAA<br>CGUAACA<br>GUACUUA<br>GAUUUAU  | Weak             |               | YES |
| KCNH4     | 23415  | NM_012285 | 2 | Medium<br>Weak         |  | YES<br>YES               | D-006234-01<br>D-006234-02<br>D-006234-03<br>D-006234-05 | GCACUGU<br>GGACUGC<br>GACCAGU<br>CAUCGAC  | Medium           |               |     |
| KIAA0586  | 9786   | NM_014749 | 2 | Weak<br>Weak           |  | YES                      | D-020892-01<br>D-020892-02<br>D-020892-03<br>D-020892-04 | CAAAGUU<br>CAACAGU<br>UCAAACAC<br>GGACAGA | Cytotoxic Bypass | Did not score |     |
| KIAA1446  | 57596  | NM_020836 | 2 | Weak<br>Weak<br>Weak   |  |                          | D-014095-01<br>D-014095-02<br>D-014095-03<br>D-014095-04 | GGAGACA<br>GCCCAGA<br>GGACAAC<br>CCAAGGU  | Weak+            |               | YES |
| KIAA1912  | 114800 | XM_055636 | 2 | Weak<br>Weak<br>Weak   |  |                          | D-022684-01<br>D-022684-02<br>D-022684-03<br>D-022684-04 | GAAUCAAC<br>GUACAAA<br>GGAUUUA<br>GGUACAU | Medium           |               |     |
| KIF1B     | 23095  | NM_015074 | 2 | Weak<br>Medium         |  | YES                      | D-009317-01<br>D-009317-02<br>D-009317-03<br>D-009317-04 | GAAGAAA<br>GGAGAUC<br>CAACUGC<br>UGAAGAA  | Medium           |               |     |

|           |        |           |   |                                  |  |                   |                                                          |                                          |        |  |     |
|-----------|--------|-----------|---|----------------------------------|--|-------------------|----------------------------------------------------------|------------------------------------------|--------|--|-----|
| KLHDC5    | 57542  | NM_020782 | 2 | Weak<br>Weak                     |  |                   | D-027054-01<br>D-027054-02<br>D-027054-03<br>D-027054-04 | GGUCUUA<br>GGUCUAA<br>GACAUAA<br>AUAACUG | Weak+  |  | YES |
| KRTAP11-1 | 337880 | NM_175858 | 2 | Weak<br>Medium<br>Medium<br>Weak |  | YES               | D-017999-01<br>D-017999-02<br>D-017999-03<br>D-017999-04 | GGAGGAC<br>CGACAAA<br>GCUGUGA<br>CGGCGAA | Medium |  |     |
| LOC129642 | 129642 | NM_138799 | 2 |                                  |  | YES               | D-010299-01<br>D-010299-02<br>D-010299-03<br>D-010299-04 | GAAGGCA<br>GAACUUA<br>GCACAUU<br>GCAAUAA | Medium |  |     |
| LOC148898 | 148898 | NM_138479 | 2 | Weak<br>Weak                     |  | YES               | D-031726-01<br>D-031726-02<br>D-031726-03<br>D-031726-04 | GCAGGUA<br>GCGAAGC<br>GCAGGCA<br>CGAACAG | Medium |  |     |
| LOC155036 | 155036 | XM_376722 | 2 | Weak<br>Medium                   |  | YES<br>YES<br>YES | D-028875-01<br>D-028875-02<br>D-028875-03<br>D-028875-04 | UAACUGA<br>UUACGGA<br>GGAAGUG<br>GGACACA | Medium |  |     |
| LOC256223 | 256223 | XM_170840 | 2 | Medium<br>Weak+                  |  | YES               | D-023341-01<br>D-023341-02<br>D-023341-03<br>D-023341-04 | GGAAGUG<br>AAUCAUG<br>UGGCAAA<br>GGGCCUG | Medium |  |     |
| LOC284390 | 284390 | XM_371138 | 2 | Weak<br><br>Weak<br>Weak+        |  | YES               | D-031229-01<br>D-031229-02<br>D-031229-03<br>D-031229-04 | GAUCCUA<br>GGGAAUG<br>AAUAAA<br>UGUCAUU  | Weak+  |  |     |
| LOC284749 | 284749 | XM_378983 | 2 | <br>Weak<br>Weak+                |  | YES<br>YES        | D-031307-01<br>D-031307-02<br>D-031307-03<br>D-031307-04 | GGAAGG<br>AGACAAA<br>GCUCUCA<br>GGAUUCC  | Weak+  |  |     |
| LOC286009 | 286009 | XM_376665 | 2 | Weak<br><br>Weak+                |  | YES<br>YES        | D-028925-01<br>D-028925-02<br>D-028925-03<br>D-028925-04 | GCAAACA<br>UACAGAA<br>GUAGAAA<br>UAAAAUC | Medium |  |     |
| LOC286144 | 286144 | XM_379592 | 2 | Weak<br>Weak+                    |  | YES               | D-029342-01<br>D-029342-02<br>D-029342-03<br>D-029342-04 | GCAGCAA<br>CAUAUAC<br>UGAAGAC<br>UAACCUC | Medium |  |     |
| LOC286157 | 286157 | XM_209920 | 2 | Weak<br>Weak+                    |  | YES<br>YES        | D-025973-01<br>D-025973-02<br>D-025973-03<br>D-025973-04 | UAAAUGA<br>GGUCAGG<br>CGUACCA<br>GUGCAGG | Weak+  |  |     |
| LOC339448 | 339448 | NM_207356 | 2 | Medium<br>Medium<br>Strong       |  | YES               | D-021859-01<br>D-021859-02<br>D-021859-03<br>D-021859-04 | UACAGAA<br>GCAGAAG<br>GACAACA<br>GAAUGAC | Weak+  |  |     |
| LOC339803 | 339803 | XM_379098 | 2 | Weak                             |  | YES<br>YES<br>YES | D-027847-01<br>D-027847-02<br>D-027847-03<br>D-027847-04 | CAAAACA<br>AAUCAAC<br>GGUAUCU<br>CAGAAGU | Medium |  |     |

|           |        |           |   |                        |           |                   |                                                          |                                            |                  |       |  |
|-----------|--------|-----------|---|------------------------|-----------|-------------------|----------------------------------------------------------|--------------------------------------------|------------------|-------|--|
| LOC345462 | 345462 | XM_293828 | 2 | Weak<br>Weak           |           | YES<br>YES        | D-024604-01<br>D-024604-02<br>D-024604-03<br>D-024604-04 | GAGAAGA<br>GAACCAU<br>CAACACAC<br>CAAUAUC  | Weak+            |       |  |
| LOC387702 | 387702 | XM_370570 | 2 | Weak<br>Weak           |           | YES<br>YES        | D-029644-01<br>D-029644-02<br>D-029644-03<br>D-029644-04 | AAAGAAG<br>CAAGAAAC<br>GGACUAC<br>GGAGUAA  | Weak+            |       |  |
| LOC387718 | 387718 | XM_370582 | 2 | Weak<br>Weak+          |           |                   | D-029689-01<br>D-029689-02<br>D-029689-03<br>D-029689-04 | GAUAAGA<br>AAAGUAA<br>CCACGAU<br>GUGACUA   | Medium           |       |  |
| LOC387816 | 387816 | XM_370664 | 2 | Medium<br>Medium       |           | YES<br>YES        | D-029818-01<br>D-029818-02<br>D-029818-03<br>D-029818-04 | GCACACA<br>UGAGAUAI<br>GAACUUU<br>UGAGAUAI | Weak+            |       |  |
| LOC388001 | 388001 | XM_373599 | 2 | Weak+<br>Weak          |           | YES               | D-030312-01<br>D-030312-02<br>D-030312-03<br>D-030312-04 | GAGCUCA<br>UAGAGAG<br>GAAGAGC<br>GUGUUAA   | Medium           |       |  |
| LOC388002 | 388002 | XM_373600 | 2 | Weak<br>Weak<br>Weak   |           | YES<br>YES<br>YES | D-030313-01<br>D-030313-02<br>D-030313-03<br>D-030313-04 | GAAGAAG<br>GCAUAAU<br>GUAUUGG<br>GGCCAAG   | Medium           |       |  |
| LOC388142 | 388142 | XM_373638 | 2 | Medium                 |           | YES               | D-030440-01<br>D-030440-02<br>D-030440-03<br>D-030440-04 | GAAGAGG<br>GGACUCA<br>UCACUAG<br>CCAAGUC   | Medium           |       |  |
| LOC388160 | 388160 | XM_370894 | 2 | Weak<br>Weak+          |           | YES               | D-030559-01<br>D-030559-02<br>D-030559-03<br>D-030559-04 | GGAAAGA<br>CCGAAAC<br>CGCAUGC<br>CUAGAAG   | Medium           |       |  |
| LOC388166 | 388166 | XM_370898 | 2 | Weak+<br>Medium        |           | YES               | D-030480-01<br>D-030480-02<br>D-030480-03<br>D-030480-04 | GCUCCCU<br>CAACCAA<br>AUACCAU<br>CCACAGU   | Cytotoxic Bypass | Weak+ |  |
| LOC388361 | 388361 | XM_371034 | 2 | Weak<br>Medium         |           | YES<br>YES        | D-030937-01<br>D-030937-02<br>D-030937-03<br>D-030937-04 | AAACAGC<br>CACGAAU<br>UUUCAUC<br>GGAACAU   | Medium           |       |  |
| LOC389276 | 389276 | XM_371728 | 2 | Weak<br>Weak<br>Weak+  |           |                   | D-028500-01<br>D-028500-02<br>D-028500-03<br>D-028500-04 | GGACAGC<br>AGUCAAA<br>AAAGGGU<br>UAAGAGU   | Weak+            |       |  |
| LOC389395 | 389395 | XM_371824 | 2 | Weak<br>Strong<br>Weak | untreated | YES               | D-028721-01<br>D-028721-02<br>D-028721-03<br>D-028721-04 | ACAUGAC<br>GAAACAU<br>GGAUCUG<br>AAAACAG   | Cytotoxic Bypass | Weak+ |  |
| LOC389541 | 389541 | XM_371939 | 2 | Weak<br>Weak           |           |                   | D-028918-01<br>D-028918-02<br>D-028918-03<br>D-028918-04 | GAACACA<br>GCGCCUG<br>GUGCAGU<br>GGAGCCC   | Medium           |       |  |

|           |        |           |   |                                      |  |                   |                                                          |                                           |        |  |  |
|-----------|--------|-----------|---|--------------------------------------|--|-------------------|----------------------------------------------------------|-------------------------------------------|--------|--|--|
| LOC389950 | 389950 | XM_372307 | 2 | Weak+                                |  |                   | D-029790-01<br>D-029790-02<br>D-029790-03<br>D-029790-04 | GGACAAA<br>GCACUGC<br>UGAUGUG<br>UGACAAA  | Weak+  |  |  |
| LOC390466 | 390466 | XM_372521 | 2 | Medium<br>Weak<br>Medium             |  | YES               | D-030360-01<br>D-030360-02<br>D-030360-03<br>D-030360-04 | GAUAGGA<br>UGAGAAG<br>GAGAAGC<br>UUUAAGA  | Weak+  |  |  |
| LOC392164 | 392164 | XM_373224 | 2 | Weak-<br><br>Weak                    |  | YES<br>YES        | D-028795-01<br>D-028795-02<br>D-028795-03<br>D-028795-04 | GAGGGAG<br>GCUCUUC<br>GAAAUAC<br>GCGUGAG  | Weak+  |  |  |
| LOC392586 | 392586 | XM_373398 | 2 | Medium<br><br>Weak<br>Weak<br>Weak+  |  | YES<br>YES        | D-031680-01<br>D-031680-02<br>D-031680-03<br>D-031680-04 | GGCCAGU<br>GAGGAGU<br>ACAUAUC<br>CCGGAGA  | Medium |  |  |
| LOC392791 | 392791 | XM_374752 | 2 |                                      |  | YES               | D-029140-01<br>D-029140-02<br>D-029140-03<br>D-029140-04 | GCAGAAA<br>CAUCAUG<br>CAUCUGA<br>GCCAUGA  | Medium |  |  |
| LOC400301 | 400301 | XM_375150 | 2 | Weak<br><br>Medium<br>Weak<br>Medium |  | YES<br>YES<br>YES | D-030530-01<br>D-030530-02<br>D-030530-03<br>D-030530-04 | GGA AUGG<br>CAACAAC<br>ACUGUGG<br>GCAUCUG | Medium |  |  |
| LOC400479 | 400479 | XM_375282 | 2 |                                      |  | YES<br>YES        | D-030767-01<br>D-030767-02<br>D-030767-03<br>D-030767-04 | CUACAAA<br>CGACUUG<br>GCUGUUG<br>GAGCAUC  | Medium |  |  |
| LOC400714 | 400714 | XM_375639 | 2 | Weak<br>Medium                       |  |                   | D-031138-01<br>D-031138-02<br>D-031138-03<br>D-031138-04 | GAACUGC<br>UAGCUCA<br>GGGCAUC<br>CAUCCUU  | Medium |  |  |
| LOC400842 | 400842 | XM_375914 | 2 | Weak<br>Medium                       |  | YES               | D-031352-01<br>D-031352-02<br>D-031352-03<br>D-031352-04 | UCUCUGG<br>CAGAAGA<br>GAAAGGC<br>CAGAUGA  | Weak+  |  |  |
| LOC401293 | 401293 | XM_376558 | 2 | Weak+<br>Weak                        |  | YES<br>YES<br>YES | D-028730-01<br>D-028730-02<br>D-028730-03<br>D-028730-04 | CUAAGA<br>CAACACA<br>CAAAGCA<br>GGAACGC   | Medium |  |  |
| LOC401440 | 401440 | XM_379539 | 2 | Medium<br>Medium                     |  | YES               | D-029252-01<br>D-029252-02<br>D-029252-03<br>D-029252-04 | GGAAGAC<br>GAAAAGC<br>CCAGUUG<br>UGUCUCU  | Medium |  |  |
| LRRC34    | 151827 | NM_153353 | 2 | Weak<br><br>Weak<br>Weak             |  | YES<br>YES        | D-016744-01<br>D-016744-02<br>D-016744-03<br>D-016744-04 | GAUAUAA<br>GCCCGAA<br>CAGCAGG<br>GAUGAGG  | Strong |  |  |
| LSECTIN   | 339390 | NM_198492 | 2 |                                      |  | YES<br>YES        | D-032216-01<br>D-032216-02<br>D-032216-03<br>D-032216-04 | CGAGGGC<br>ACAAACG<br>GGAACGA<br>CGCGAGA  | Weak+  |  |  |



|          |        |             |   |                          |           |                   |                                                          |                                          |                  |               |     |
|----------|--------|-------------|---|--------------------------|-----------|-------------------|----------------------------------------------------------|------------------------------------------|------------------|---------------|-----|
| MGC13204 | 83695  | NM_031465   | 2 | Weak                     |           | YES<br>YES<br>YES | D-014736-01<br>D-014736-02<br>D-014736-03<br>D-014736-04 | GAGCUUA<br>GCGAGAC<br>GAGGACA<br>GACCUGU | Cytotoxic        | Did not score | YES |
| MGC26717 | 285237 | NM_173824   | 2 | Weak-<br>Weak            |           | YES<br>YES        | D-009016-01<br>D-009016-02<br>D-009016-03<br>D-009016-04 | CAACCUA<br>CCACCGA<br>CCAAUGA<br>GGACAUC | Medium           |               |     |
| MLLT4    | 4301   | NM_005936   | 2 | Weak+<br>Medium<br>Weak+ | untreated | YES               | D-020075-01<br>D-020075-02<br>D-020075-03<br>D-020075-04 | UGAGAAA<br>GUUAAGG<br>CGCCUUC<br>CAUCAGC | Weak+            |               | YES |
| MMAB     | 326625 | NM_052845   | 2 | Weak+<br>Medium          |           | YES               | D-015137-01<br>D-015137-02<br>D-015137-03<br>D-015137-04 | UAAAGUA<br>CCAAAGA<br>GGAACUA<br>GGGAGAG | Medium           |               |     |
| MTP      | 4547   | NM_000253   | 2 | Weak<br>Weak+            |           | YES               | D-008301-01<br>D-008301-02<br>D-008301-03<br>D-008301-04 | GAAGACA<br>GAAGUAA<br>CAACUGG<br>GAAAGGA | Medium           |               |     |
| MYOD1    | 4654   | NM_002478   | 2 | Weak<br>Weak             |           |                   | D-010316-01<br>D-010316-02<br>D-010316-03<br>D-010316-04 | CAACGGA<br>GCAACGC<br>GCACGUC<br>CCGAAGA | Medium           |               |     |
| NARF     | 26502  | NM_012336   | 2 | Medium<br>Weak           |           | YES<br>YES        | D-012465-01<br>D-012465-02<br>D-012465-03<br>D-012465-04 | GCACACA<br>GAACGGA<br>CCAAGGA<br>GCUGGAG | Cytotoxic Bypass | Did not score | YES |
| NYD-TSP1 | 84654  | NM_032567   | 2 | Weak<br>Medium           |           | YES               | D-015845-01<br>D-015845-02<br>D-015845-03<br>D-015845-04 | GAAUGAA<br>UAACGAA<br>GUAGAAG<br>GCAAUAC | Weak+            |               |     |
| OR10K1   | 391109 | NM_00100447 | 2 | Weak+<br>Medium          |           |                   | D-032412-01<br>D-032412-02<br>D-032412-03<br>D-032412-04 | CAAUACA<br>GCUAUAC<br>UAACUGU<br>CAAGACU | Medium           |               |     |
| OR2T11   | 127077 | NM_00100196 | 2 | Weak<br>Strong           |           |                   | D-032345-01<br>D-032345-02<br>D-032345-03<br>D-032345-04 | GGGAUUG<br>GCAAAUU<br>GACACGU<br>CCCGAAG | Weak+            |               |     |
| OR51F2   | 119694 | NM_00100475 | 2 | Weak<br>Weak<br>Weak     |           | YES<br>YES<br>YES | D-026821-01<br>D-026821-02<br>D-026821-03<br>D-026821-04 | GCCAAUG<br>GGGAUGA<br>CUAUGUC<br>CUACACG | Medium           |               |     |
| OR6V1    | 346517 | NM_00100166 | 2 | Weak<br>Medium           |           | YES<br>YES        | D-032315-01<br>D-032315-02<br>D-032315-03<br>D-032315-04 | GAGCUCA<br>GAGCCAG<br>ACACUCG<br>CUACAGU | Medium           |               |     |
| PAQR4    | 124222 | NM_152341   | 2 | Medium<br>Weak+          |           | YES<br>YES        | D-007910-01<br>D-007910-02<br>D-007910-03<br>D-007910-04 | CUGCAGG<br>UGGUAAA<br>ACAACGA<br>ACACUGU | Medium           |               |     |

|          |        |           |   |                 |  |                          |                                                                         |                                            |                  |        |     |
|----------|--------|-----------|---|-----------------|--|--------------------------|-------------------------------------------------------------------------|--------------------------------------------|------------------|--------|-----|
| PDE6D    | 5147   | NM_002601 | 2 | Weak+           |  |                          | D-004310-01<br>D-004310-02<br>D-004310-03<br>D-004310-08                | UGACGAC<br>CGUCUUA<br>CAAACUAA<br>AUCCCUAA | Medium           |        |     |
| PHLDA1   | 22822  | NM_007350 | 2 | Weak<br>Weak    |  | YES                      | D-012389-01<br>D-012389-02<br>D-012389-03<br>D-012389-04                | GAACUGC<br>GAGGAAG<br>UGAAGAC<br>UCAAAUC   | Medium           |        |     |
| PLS1     | 5357   | NM_002670 | 2 | Weak+           |  | YES<br>YES               | D-011356-01<br>D-011356-02<br>D-011356-03<br>D-011356-04                | GGAGUCA<br>AAAGAUC<br>GGCAGGA<br>GCCAAGA   | Strong           |        |     |
| POTE15   | 339010 | NM_207355 | 2 | Weak<br>Medium  |  |                          | D-032043-01<br>D-032043-02<br>D-032043-03<br>D-032043-04                | GUGAAUU<br>GACAACU<br>CGACGAC<br>UGGCUGA   | Weak+            |        |     |
| PPARBP   | 5469   | NM_004774 | 2 | Weak+<br>Medium |  | YES<br>YES               | D-004126-01<br>D-004126-02<br>D-004126-03<br>D-004126-08<br>D-004126-09 | GAGGAAA<br>GCAGAGA<br>CAAGCUG<br>GAAUAAU   | Medium           |        | YES |
| PPM1A    | 5494   | NM_021003 | 2 | Weak+<br>Weak   |  | YES                      | D-009574-01<br>D-009574-02<br>D-009574-04<br>D-009574-05                | GCAGGUG<br>GUAAUCC<br>GGUAAUG<br>GUAAUGG   | Weak             |        |     |
| PPM1L    | 151742 | NM_139245 | 2 | Weak<br>Medium  |  | YES<br>YES<br>YES        | D-008679-01<br>D-008679-02<br>D-008679-03<br>D-008679-04                | UCACAAG<br>GCAGGUG<br>UGAAGAA<br>GAAGCAG   | Medium           |        |     |
| PRICKLE2 | 166336 | NM_198859 | 2 | Weak<br>Weak+   |  | YES<br>YES<br>YES<br>YES | D-023495-01<br>D-023495-02<br>D-023495-03<br>D-023495-04                | GGAAGAG<br>CUGAACAA<br>ACAUUAU<br>GCAAGUG  | Medium           |        |     |
| PRKAG2   | 51422  | NM_016203 | 2 | Medium<br>Weak  |  | YES                      | D-009693-01<br>D-009693-02<br>D-009693-03<br>D-009693-04                | GCACGAG<br>GCAAUAA<br>CCACAACA<br>GGAAUGC  | Medium           |        | YES |
| PSCD1    | 9267   | NM_004762 | 2 | Weak<br>Weak    |  | YES<br>YES               | D-011926-01<br>D-011926-02<br>D-011926-03<br>D-011926-04                | GGAAUCA<br>AAGAGAC<br>GGGAGAG<br>GCAAUAU   | Medium           |        |     |
| PTGFRN   | 5738   | XM_040709 | 2 | Weak<br>Medium  |  | YES<br>YES<br>YES        | D-010619-01<br>D-010619-02<br>D-010619-03<br>D-010619-04                | GCAAGGA<br>GAACUGG<br>GAAGACA<br>GAAACGA   | Cytotoxic Bypass | Medium |     |
| PTPRO    | 5800   | NM_002848 | 2 | Weak<br>Weak    |  | YES                      | D-008500-01<br>D-008500-02<br>D-008500-04<br>D-008500-05                | CAACAAA<br>GAAAGUA<br>GAGCAA<br>GGUCAUA    | Medium           |        |     |
| RAD23A   | 5886   | NM_005053 | 2 | Weak<br>Weak    |  | YES<br>YES<br>YES        | D-005231-01<br>D-005231-02<br>D-005231-03<br>D-005231-04                | GAACUUU<br>GAAGUAU<br>GAACAUG<br>GGAGAAA   | Weak             |        | YES |

|         |       |           |   |                        |  |                          |                                                          |                                            |                  |               |     |
|---------|-------|-----------|---|------------------------|--|--------------------------|----------------------------------------------------------|--------------------------------------------|------------------|---------------|-----|
| RAP1B   | 5908  | NM_015646 | 2 | Medium<br>Medium       |  | YES<br>YES<br>YES<br>YES | D-010364-01<br>D-010364-03<br>D-010364-04<br>D-010364-05 | GAACAACI<br>CAAUGAU<br>GACCUAGI<br>AGUUAAG | Medium           |               |     |
| RAPGEF6 | 51735 | NM_016340 | 2 | Weak<br>Medium         |  | YES<br>YES<br>YES        | D-008593-01<br>D-008593-02<br>D-008593-03<br>D-008593-04 | CAAGGAA<br>GGACUAA<br>GGAGAGC<br>GGUAGGA   | Cytotoxic        |               | YES |
| RARRES3 | 5920  | NM_004585 | 2 | Weak<br>Medium         |  | YES<br>YES<br>YES<br>YES | D-011889-01<br>D-011889-03<br>D-011889-04<br>D-011889-05 | GCACUGG<br>CAACAGU<br>UAUGGCA<br>CGAAGGA   | Weak+            |               |     |
| RBBP8   | 5932  | NM_002894 | 2 | Weak<br>Weak           |  | YES<br>YES               | D-011376-01<br>D-011376-02<br>D-011376-03<br>D-011376-04 | GAGCAGA<br>GAAGUGA<br>CAACCAAC<br>GAAUAGG  | Cytotoxic Bypass | Did not score | YES |
| RBM15   | 64783 | NM_022768 | 2 | Weak<br>Weak           |  |                          | D-010854-01<br>D-010854-02<br>D-010854-03<br>D-010854-04 | GGACAGA<br>GAAGUA<br>GGACACC<br>GGUGUA     | Medium           |               | YES |
| RERE    | 473   | NM_012102 | 2 | Weak<br>Weak           |  | YES                      | D-008367-01<br>D-008367-02<br>D-008367-03<br>D-008367-04 | GAGAUGA<br>GGAAGAG<br>GAACCGA<br>GAAGAAA   | Weak+            |               |     |
| RFX2    | 5990  | NM_000635 | 2 | Weak<br>Medium         |  | YES<br>YES<br>YES        | D-011129-01<br>D-011129-02<br>D-011129-03<br>D-011129-04 | GAAGGCU<br>UGACACA<br>UGACGCU<br>GAGAGAC   | Medium           |               |     |
| RIC-8   | 60626 | NM_021932 | 2 | Weak<br>Weak           |  | YES                      | D-016121-01<br>D-016121-02<br>D-016121-03<br>D-016121-04 | GAGAAGC<br>CCACGGA<br>GGGAGAU<br>GAAGCCG   | Weak             |               | YES |
| SBDS    | 51119 | NM_016038 | 2 | Medium<br>Weak+        |  |                          | D-019217-01<br>D-019217-02<br>D-019217-03<br>D-019217-04 | GUAAGCA<br>GAGAUGA<br>UUAGAAA<br>UGGAAGU   | Medium           |               |     |
| SCGB1A1 | 7356  | NM_003357 | 2 | Weak<br>Medium         |  | YES<br>YES               | D-016680-01<br>D-016680-02<br>D-016680-03<br>D-016680-04 | GGACACA<br>CCAGAGA<br>GAAACUC<br>CAAAGCU   | Medium           |               |     |
| SMNDC1  | 10285 | NM_005871 | 2 | Medium<br>Medium       |  | YES                      | D-016257-01<br>D-016257-02<br>D-016257-03<br>D-016257-04 | CAACAGA<br>GCAACAA<br>CCAAGAG<br>GAAAGUA   | Medium           |               |     |
| STK22D  | 83942 | NM_032028 | 2 | Medium<br>Weak<br>Weak |  | YES                      | D-005038-05<br>D-005038-07<br>D-005038-08<br>D-005038-09 | GGACGAA<br>GGAUGAC<br>CCAGCAA<br>CAUCACA   | Medium           |               |     |
| TCEA1   | 6917  | NM_006756 | 2 | Weak<br>Weak           |  | YES                      | D-010496-01<br>D-010496-02<br>D-010496-03<br>D-010496-04 | GAAAGAA<br>GAACGCG<br>CAAGUCI<br>GCACCAA   | Weak             |               | YES |

|         |        |           |   |                        |           |                          |                                                          |                                               |                  |               |     |
|---------|--------|-----------|---|------------------------|-----------|--------------------------|----------------------------------------------------------|-----------------------------------------------|------------------|---------------|-----|
| TRAPPC1 | 58485  | NM_021210 | 2 | Medium<br>Medium       |           |                          | D-013781-01<br>D-013781-02<br>D-013781-03<br>D-013781-04 | GUUACAA/<br>CGACUGG/<br>GGAUCAAA/<br>CCACAACC | Weak+            |               |     |
| TXNDC2  | 84203  | NM_032243 | 2 | Medium<br>Weak         |           | YES<br>YES<br>YES<br>YES | D-018662-01<br>D-018662-02<br>D-018662-03<br>D-018662-04 | GCGAUGA/<br>AAGAAACG/<br>AAGCAGU/<br>AGGAAGC  | Cytotoxic        | Did not score |     |
| WDHD1   | 11169  | NM_007086 | 2 | Weak+<br>Weak          |           | YES                      | D-019780-01<br>D-019780-02<br>D-019780-03<br>D-019780-04 | GAUCAGA/<br>GGUAAUA/<br>GCUGUGA/<br>GGUCGAA   | Cytotoxic Bypass | Did not score | YES |
| WDR40B  | 139170 | NM_178470 | 2 | Medium<br>Weak<br>Weak |           |                          | D-017873-01<br>D-017873-02<br>D-017873-03<br>D-017873-04 | GUGAUGA/<br>CAAGUUC/<br>CCACAUC/<br>UUACUUU   | Medium           |               |     |
| WEE1    | 7465   | NM_003390 | 2 | Weak<br>Medium         | untreated | YES                      | D-005050-01<br>D-005050-02<br>D-005050-03<br>D-005050-04 | GCAGAAC/<br>UAGAACA/<br>GAUCAUA/<br>AAUCGGC   | Cytotoxic        | Medium        |     |
| ZNF307  | 387032 | NM_019110 | 2 | Weak<br>Weak<br>Weak   |           | YES<br>YES               | D-032209-01<br>D-032209-02<br>D-032209-03<br>D-032209-04 | GGGAAGA/<br>GGAGUAG/<br>GGUGAAA/<br>GACACAA   | Medium           |               | YES |
| ZNF616  | 90317  | XM_030892 | 2 | Weak                   |           | YES<br>YES<br>YES        | D-023805-01<br>D-023805-02<br>D-023805-03<br>D-023805-04 | GUUCACA/<br>CAGCAUA/<br>GGAGAAG/<br>CACUAAAC  | Weak+            |               |     |
| ABCA6   | 23460  | NM_080284 | 1 | Weak+                  |           | YES<br>YES               | D-008535-01<br>D-008535-02<br>D-008535-03<br>D-008535-04 | GGAUGGA/<br>CAAACUG/<br>CAUGAGA/<br>GGAUUAU   | Medium           |               |     |
| ABCB4   | 5244   | NM_000443 | 1 | Medium                 |           | YES<br>YES               | D-007302-01<br>D-007302-02<br>D-007302-03<br>D-007302-04 | GCUGAAG/<br>ACAAGAA/<br>GACAUGA/<br>GAACUGG   | Strong           |               |     |
| ABHD1   | 84696  | NM_032604 | 1 | Medium                 |           | YES<br>YES               | D-013589-01<br>D-013589-02<br>D-013589-03<br>D-013589-04 | GCAGUAG/<br>GCUCUUG/<br>GGAUAUC/<br>GUACAAU   | Medium           |               |     |
| ACTC    | 70     | NM_005159 | 1 | Weak                   |           | YES                      | D-012015-01<br>D-012015-02<br>D-012015-03<br>D-012015-04 | GCAUGUC/<br>GCAUCCA/<br>CAACAAU/<br>CUACGUA   | Medium           |               |     |
| ADAM30  | 11085  | NM_021794 | 1 | Weak                   |           |                          | D-005759-01<br>D-005759-02<br>D-005759-03<br>D-005759-04 | GGAGCAA/<br>GCGAUUC/<br>GAACAAC/<br>GAGCAUA   | Weak+            |               |     |
| ADNP    | 23394  | NM_015339 | 1 | Medium                 |           |                          | D-012857-01<br>D-012857-02<br>D-012857-03<br>D-012857-04 | CAACAAU/<br>CGAAGAC/<br>GAAGAAG/<br>GGAAAUG   | Medium           |               | YES |

|         |        |           |   |                 |           |                          |                                                          |                                          |                  |       |     |
|---------|--------|-----------|---|-----------------|-----------|--------------------------|----------------------------------------------------------|------------------------------------------|------------------|-------|-----|
| ADPRTL1 | 143    | NM_006437 | 1 | Weak            |           | YES<br>YES<br>YES        | D-007244-01<br>D-007244-02<br>D-007244-03<br>D-007244-04 | GAAGACA<br>GAACUGG<br>GGUUGAA<br>GCACACA | Medium           |       |     |
| ADRB3   | 155    | NM_000025 | 1 | Weak            |           | YES                      | D-005427-01<br>D-005427-02<br>D-005427-03<br>D-005427-04 | UGACAGA<br>GAAAUCC<br>GGUCAAA<br>GAACAGA | Strong           |       |     |
| APRIN   | 23047  | NM_015032 | 1 | Strong          |           | YES                      | D-010362-01<br>D-010362-02<br>D-010362-03<br>D-010362-04 | GAUGAAU<br>GAACUUC<br>GAACAAA<br>AGACGAC | Medium           |       | YES |
| ARL2BP  | 23568  | NM_012106 | 1 | Weak+           |           | YES                      | D-013074-01<br>D-013074-02<br>D-013074-03<br>D-013074-04 | GAAUACA<br>GAGAAUA<br>GAUGACG<br>AGUACUA | Medium           |       | YES |
| ATF3    | 467    | NM_001674 | 1 | Weak            |           | YES<br>YES<br>YES        | D-008663-01<br>D-008663-02<br>D-008663-03<br>D-008663-04 | GCAAAGU<br>AGAAGCA<br>GAGAAAC<br>GAUAAAA | Medium           |       |     |
| AUP1    | 550    | NM_012103 | 1 | Medium          |           | YES                      | D-012410-01<br>D-012410-02<br>D-012410-03<br>D-012410-04 | GCCAACA<br>GCAAGCA<br>CAACAUA<br>GAUGUGG | Weak+            |       |     |
| B3GALT1 | 8708   | NM_020981 | 1 | Weak            |           |                          | D-013691-01<br>D-013691-02<br>D-013691-03<br>D-013691-04 | CAUAAGA<br>UAUCAAC<br>UAACUCG<br>CGGGAUG | Weak+            |       |     |
| B4GALT1 | 2683   | NM_001497 | 1 | Weak<br>Medium  |           | YES                      | D-012965-01<br>D-012965-02<br>D-012965-03<br>D-012965-04 | GUACAGA<br>GACUAUG<br>CCAUCUG<br>GCGUCAC | Weak+            |       |     |
| BBS7    | 55212  | NM_018190 | 1 |                 |           | YES<br>YES               | D-013346-01<br>D-013346-02<br>D-013346-03<br>D-013346-04 | UAACAGG<br>UUACAGG<br>GCGCUUA<br>GUUCUAC | Cytotoxic Bypass | Weak+ |     |
| BECN1   | 8678   | NM_003766 | 1 | Weak            | untreated |                          | D-010552-01<br>D-010552-02<br>D-010552-03<br>D-010552-04 | CUAAGGA<br>GGAUGAC<br>UAAGAUG<br>GCCAACA | Strong           |       |     |
| BOMB    | 80014  | NM_024949 | 1 | Weak+           |           | YES                      | D-016585-01<br>D-016585-02<br>D-016585-03<br>D-016585-04 | GCGGACA<br>GACCUUU<br>UGAAUUA<br>CCACCGA | Medium           |       |     |
| BTBD14A | 138151 | NM_144653 | 1 | Weak            |           | YES<br>YES<br>YES<br>YES | D-015957-01<br>D-015957-02<br>D-015957-03<br>D-015957-04 | GCACCGA<br>GAACUGA<br>GAAAUUG<br>GUGCAGG | Cytotoxic        | Weak+ |     |
| BTG1    | 694    | NM_001731 | 1 | Weak+<br>Medium | untreated | YES<br>YES               | D-011598-01<br>D-011598-02<br>D-011598-03<br>D-011598-04 | GAACUCA<br>UGAAGUG<br>GUUUUCG<br>CCAACGU | Medium           |       |     |

|           |        |           |   |                |           |                   |                                                          |                                           |           |               |     |
|-----------|--------|-----------|---|----------------|-----------|-------------------|----------------------------------------------------------|-------------------------------------------|-----------|---------------|-----|
| C11ORF11  | 747    | NM_006133 | 1 | Medium<br>Weak | untreated | YES<br>YES<br>YES | D-012209-01<br>D-012209-02<br>D-012209-03<br>D-012209-04 | UGACUGA<br>GACAAGA<br>CACAAAG<br>GGAGCAA  | Medium    |               |     |
| C14ORF147 | 171546 | NM_138288 | 1 | Weak+          |           | YES               | D-017156-01<br>D-017156-02<br>D-017156-03<br>D-017156-04 | GCACUAC<br>GAGCGGA<br>AAGCAGA<br>CAGCACAU | Weak+     |               |     |
| C14ORF149 | 112849 | NM_144581 | 1 | Weak           |           | YES               | D-010373-01<br>D-010373-02<br>D-010373-03<br>D-010373-04 | GCAGUGA<br>GAAGCGA<br>GAAGAUG<br>GGAGUGA  | Weak+     |               |     |
| C14ORF39  | 317761 | NM_174978 | 1 | Weak           |           |                   | D-017933-01<br>D-017933-02<br>D-017933-03<br>D-017933-04 | GUUCACA<br>CGUCUGA<br>GAGUUUA<br>UAGGAUA  | Weak      |               |     |
| C14ORF48  | 256369 | NM_152777 | 1 | Weak           |           | YES<br>YES        | D-016258-01<br>D-016258-02<br>D-016258-03<br>D-016258-04 | GGACCAC<br>CAGAAGA<br>GAGAAGU<br>CGGUGAA  | Weak+     |               |     |
| C18ORF37  | 125476 | NM_194281 | 1 | Weak           |           |                   | D-019327-01<br>D-019327-02<br>D-019327-03<br>D-019327-04 | UAAGCCA<br>UUAAGGA<br>AACAAAU<br>CAGGUCU  | Cytotoxic | Did not score |     |
| C1ORF21   | 81563  | NM_030806 | 1 | Weak           |           | YES<br>YES<br>YES | D-010941-01<br>D-010941-02<br>D-010941-03<br>D-010941-04 | AUAAAGA<br>GAGCAA<br>AAGAAGA<br>GAGAUGU   | Weak+     |               |     |
| C22ORF19  | 8563   | NM_003678 | 1 | Weak           |           | YES               | D-015317-01<br>D-015317-02<br>D-015317-03<br>D-015317-04 | AAAUUGA<br>GAAUCGA<br>GAGACUA<br>CGAGAGU  | Weak+     |               | YES |
| C7ORF20   | 51608  | NM_015949 | 1 | Weak           |           | YES               | D-020967-01<br>D-020967-02<br>D-020967-03<br>D-020967-04 | AAACAGU<br>CCAAGCA<br>GUGAGUC<br>UCGAGAA  | Strong    |               |     |
| C9ORF89   | 84270  | NM_032310 | 1 | Weak           |           | YES               | D-016972-01<br>D-016972-02<br>D-016972-03<br>D-016972-04 | GAUCAGA<br>CACCAAC<br>UCUUUA<br>GGGACUG   | Cytotoxic | Did not score | YES |
| CADPS2    | 93664  | NM_017954 | 1 | Weak           |           | YES               | D-018078-01<br>D-018078-02<br>D-018078-03<br>D-018078-04 | GAAAGGU<br>GCAGACA<br>GCAACGC<br>GUGCGGA  | Cytotoxic | Did not score | YES |
| CAPN7     | 23473  | NM_014296 | 1 | Medium         |           | YES               | D-005807-01<br>D-005807-02<br>D-005807-03<br>D-005807-04 | UAACAGC<br>GAAUUGC<br>UGAAAGA<br>GAAGUUA  | Medium    |               |     |
| CASP14    | 23581  | NM_012114 | 1 | Weak           |           | YES<br>YES        | D-004403-01<br>D-004403-02<br>D-004403-03<br>D-004403-04 | GGACUAU<br>GAGCUAA<br>GAGAUGA<br>ACAGAUG  | Medium    |               |     |

|        |       |           |   |                  |           |                   |                                                          |                                          |           |               |     |
|--------|-------|-----------|---|------------------|-----------|-------------------|----------------------------------------------------------|------------------------------------------|-----------|---------------|-----|
| CAT    | 847   | NM_001752 | 1 | Medium           |           |                   | D-010021-01<br>D-010021-02<br>D-010021-03<br>D-010021-04 | CACAUGA<br>GGAAUCC<br>GAGCACA<br>GGACAUC | Medium    |               |     |
|        |       |           |   |                  | untreated |                   |                                                          |                                          |           |               |     |
| CCHCR1 | 54535 | NM_019052 | 1 | Medium           |           | YES               | D-020481-01<br>D-020481-02<br>D-020481-03<br>D-020481-04 | GAGACAA<br>GGACCUG<br>UUAAGCA<br>CCUGAUU | Medium    |               |     |
| CCL26  | 10344 | NM_006072 | 1 | Weak+            |           |                   | D-007838-01<br>D-007838-02<br>D-007838-03<br>D-007838-04 | GCUAUGA<br>GAUUAUC<br>GAAAGUC<br>GGAGUGA | Weak+     |               |     |
| CCM1   | 889   | NM_004912 | 1 | Weak             |           | YES<br>YES<br>YES | D-003825-01<br>D-003825-03<br>D-003825-04<br>D-003825-05 | GAAGCUA<br>CAUAUUG<br>UGAAAUA<br>GAUUAUA | Weak+     |               |     |
| CD160  | 11126 | NM_007053 | 1 | Weak+            |           | YES               | D-019771-01<br>D-019771-02<br>D-019771-03<br>D-019771-04 | CGACUAA<br>CAGUUGA<br>GAUAGAU<br>GAAGUCA | Medium    |               |     |
| CD8B1  | 926   | NM_004931 | 1 | Medium<br>Medium |           | YES<br>YES<br>YES | D-011975-01<br>D-011975-02<br>D-011975-03<br>D-011975-04 | GAAGAGA<br>GCUAAAA<br>GAAGAU<br>GAUGCAA  | Medium    |               |     |
| CDH9   | 1007  | NM_016279 | 1 | Medium<br>Medium |           | YES<br>YES        | D-013169-01<br>D-013169-02<br>D-013169-03<br>D-013169-04 | CAACAAC<br>GAACCGG<br>GCUGGCA<br>AAAGAU  | Medium    |               |     |
| CDK5   | 1020  | NM_004935 | 1 | Weak+<br>Weak    |           | YES<br>YES<br>YES | D-003239-05<br>D-003239-06<br>D-003239-07<br>D-003239-08 | UGACCAA<br>GAGCUGA<br>CAACAUC<br>GGAUUCC | Weak+     |               |     |
| CDKN1A | 1026  | NM_000389 | 1 | Medium<br>Medium |           | YES               | D-003471-01<br>D-003471-02<br>D-003471-03<br>D-003471-04 | GAUGGAA<br>GCGAUGG<br>CGAUGGA<br>CGACUGU | Medium    |               |     |
| CHAF1A | 10036 | NM_005483 | 1 | Weak             |           |                   | D-019938-01<br>D-019938-04<br>D-019938-05<br>D-019938-06 | GAAAGGA<br>ACACGAA<br>AAACAAC<br>GACAUAG | Cytotoxic | Did not score | YES |
| CKAP1  | 1155  | NM_001281 | 1 | Weak             |           | YES               | D-020186-01<br>D-020186-02<br>D-020186-03<br>D-020186-04 | GGGAAAC<br>UCGUGA<br>GGAUUGG<br>GUAUGGA  | Medium    |               | YES |
| CKAP4  | 10970 | NM_006825 | 1 | Weak             |           | YES               | D-012755-01<br>D-012755-02<br>D-012755-03<br>D-012755-04 | CCAAAUC<br>CCAAGGG<br>AGACCCA<br>CGGCAGG | Medium    |               |     |
| CNIH   | 10175 | NM_005776 | 1 | Medium           |           | YES               | D-019989-01<br>D-019989-02<br>D-019989-03<br>D-019989-04 | GGAAGGA<br>UAUAUGG<br>CCUAUAG<br>AUUUGGA | Cytotoxic | Did not score |     |

|              |        |           |   |              |           |                   |                                                          |                                              |        |  |     |
|--------------|--------|-----------|---|--------------|-----------|-------------------|----------------------------------------------------------|----------------------------------------------|--------|--|-----|
| COG7         | 91949  | NM_153603 | 1 | Weak         |           |                   | D-015904-01<br>D-015904-02<br>D-015904-03<br>D-015904-04 | CCAAGUAI<br>GUGAAGG<br>UAAUGAU<br>UGAAUAU    | Medium |  |     |
| COLEC12      | 81035  | NM_030781 | 1 | Medium       |           | YES<br>YES<br>YES | D-013240-01<br>D-013240-02<br>D-013240-03<br>D-013240-04 | GAUCUGAI<br>GAAUAACU<br>UCACGAAL<br>GCACAGAI | Weak   |  |     |
| CPN2         | 1370   | J05158    | 1 | Weak+        |           | YES               | D-023553-01<br>D-023553-02<br>D-023553-03<br>D-023553-04 | CCGAUCG<br>GGACUGC<br>CAACCUG<br>GGUAAUC     | Medium |  |     |
| CTSL2        | 1515   | NM_001333 | 1 | Medium       |           | YES<br>YES        | D-005842-03<br>D-005842-04<br>D-005842-05<br>D-005842-06 | GAAACAGI<br>GGAAUAG<br>GAUGAUG<br>GGGAAUA    | Medium |  |     |
| CWF19L1      | 55280  | NM_018294 | 1 | Weak         |           |                   | D-016322-01<br>D-016322-02<br>D-016322-03<br>D-016322-04 | CGAGGGA<br>CAGCAUG<br>GUACCAG<br>GUUUUAG     | Weak+  |  |     |
| CXORF20      | 139105 | NM_153346 | 1 | Weak<br>Weak |           | YES<br>YES<br>YES | D-016795-01<br>D-016795-02<br>D-016795-03<br>D-016795-04 | GGAAGAC<br>GUUAUGG<br>GGUCCAA<br>ACCCUGG     | Medium |  |     |
| CYP2C9       | 1559   | NM_000771 | 1 |              |           |                   | D-008285-01<br>D-008285-02<br>D-008285-03<br>D-008285-04 | GCAGUGAI<br>GCACAAC<br>UAACCAA<br>GGGAACU    | Weak+  |  |     |
| DAZL         | 1618   | NM_001351 | 1 | Weak         |           |                   | D-011249-01<br>D-011249-02<br>D-011249-03<br>D-011249-04 | GGGCAAU<br>GAGCAAA<br>GAAGCUU<br>CGAUGAA     | Weak+  |  |     |
| DGAT2L3      | 158833 | XM_088691 | 1 | Weak         |           | YES<br>YES<br>YES | D-010304-01<br>D-010304-02<br>D-010304-03<br>D-010304-04 | AAACUGAI<br>ACAAAUA<br>GAAGACA<br>CAGCACA    | Medium |  |     |
| DHX9         | 1660   | NM_001357 | 1 | Weak         |           |                   | D-009950-01<br>D-009950-02<br>D-009950-03<br>D-009950-04 | UAGAAUG<br>GGCUAUA<br>CCAGAAG<br>CCAAGUU     | Strong |  | YES |
| DKFZP434E141 | 284498 | XM_209234 | 1 | Medium       | untreated | YES<br>YES        | D-021566-01<br>D-021566-02<br>D-021566-03<br>D-021566-04 | GAAUGUC<br>GGACACG<br>CACACAAC<br>CGGCUUC    | Weak+  |  |     |
| DKFZP566K052 | 26095  | NM_015605 | 1 | Weak         |           | YES<br>YES        | D-013909-01<br>D-013909-02<br>D-013909-03<br>D-013909-04 | GAGCAGAI<br>CAGAGCCI<br>AAGCAGA<br>UGAGGGA   | Weak   |  | YES |
| DKFZP686O168 | 341405 | NM_182608 | 1 | Weak         |           | YES               | D-018900-01<br>D-018900-02<br>D-018900-03<br>D-018900-04 | GGACACG<br>CCACGUG<br>CCUCAUA<br>AAAGUCC     | Medium |  |     |



|              |        |           |   |                |           |                   |                                                          |                                           |           |               |  |
|--------------|--------|-----------|---|----------------|-----------|-------------------|----------------------------------------------------------|-------------------------------------------|-----------|---------------|--|
| OKFZP7610201 | 92293  | XM_044062 | 1 |                |           |                   | D-027086-01<br>D-027086-02<br>D-027086-03<br>D-027086-04 | GCAGAUG<br>CAAUAAC<br>GACAGGA<br>GCGCUGU  | Medium    |               |  |
| DLEU2        | 8847   | NM_006021 | 1 | Weak<br>Weak+  |           | YES<br>YES<br>YES | D-020066-01<br>D-020066-02<br>D-020066-03<br>D-020066-04 | AAAGAGAA<br>GCUCAGC<br>UUUGAAA<br>AAUGAUA | Medium    |               |  |
| DNAH7        | 56171  | NM_018897 | 1 | Weak+          |           |                   | D-009928-01<br>D-009928-02<br>D-009928-03<br>D-009928-04 | GAAAGAA<br>GCAACAA<br>GAUCAGA<br>UCACUGA  | Medium    |               |  |
| DRB1         | 129831 | NM_152945 | 1 |                | untreated | YES               | D-016718-01<br>D-016718-02<br>D-016718-03<br>D-016718-04 | GUAUGGA<br>GUACCAG<br>GGGCUAC<br>GUCAUGG  | Medium    |               |  |
| EBF2         | 64641  | NM_022659 | 1 | Weak<br>Medium |           | YES               | D-013842-01<br>D-013842-02<br>D-013842-03<br>D-013842-04 | GAAAGCA<br>GGAUAUA<br>CGCCUCA<br>GGAAUAU  | Medium    |               |  |
| EDG1         | 1901   | NM_001400 | 1 |                |           | YES<br>YES<br>YES | D-003655-01<br>D-003655-03<br>D-003655-04<br>D-003655-05 | GCAGCUC<br>GGAGAAC<br>GCACCAC<br>GAUAUCA  | Medium    |               |  |
| EMR4         | 326342 | XM_377506 | 1 | Medium         |           | YES<br>YES        | D-031217-01<br>D-031217-02<br>D-031217-03<br>D-031217-04 | GGAAUAU<br>UAAAGAA<br>UGAUAUA<br>CAACGGU  | Weak+     |               |  |
| F3           | 2152   | NM_001993 | 1 | Weak<br>Weak+  |           |                   | D-004462-01<br>D-004462-02<br>D-004462-03<br>D-004462-04 | GGCAAGG<br>GAACAAC<br>AGUCUAC<br>CAUUGGA  | Medium    |               |  |
| FANCC        | 2176   | NM_000136 | 1 |                |           | YES               | D-011033-01<br>D-011033-02<br>D-011033-03<br>D-011033-04 | GGUAUGC<br>GACCAGA<br>GGAAUCG<br>GAGAGAA  | Cytotoxic | Did not score |  |
| FANCG        | 2189   | NM_004629 | 1 | Weak<br>Weak+  |           |                   | D-011899-01<br>D-011899-02<br>D-011899-03<br>D-011899-04 | GGAAUUA<br>GGACAUC<br>GCAAGCA<br>GCACUAA  | Weak      |               |  |
| FBXW11       | 23291  | NM_012300 | 1 |                |           | YES<br>YES        | D-003490-01<br>D-003490-02<br>D-003490-03<br>D-003490-04 | GUAAGGG<br>GCACAUU<br>GUUAGUG<br>GAGCAAG  | Medium    |               |  |
| FCMD         | 2218   | NM_006731 | 1 | Weak           |           |                   | D-012313-01<br>D-012313-02<br>D-012313-03<br>D-012313-04 | UAAAGAA<br>GAGGUUA<br>CUACAAG<br>GAAGCCG  | Medium    |               |  |
| FKSG17       | 83955  | NM_032031 | 1 | Medium         |           | YES<br>YES        | D-014770-01<br>D-014770-02<br>D-014770-03<br>D-014770-04 | CUGAAGA<br>UCGGUAU<br>GCACAAG<br>GCACGGA  | Strong    |               |  |

|          |        |           |   |                 |  |                          |                                                          |                                           |                  |               |     |
|----------|--------|-----------|---|-----------------|--|--------------------------|----------------------------------------------------------|-------------------------------------------|------------------|---------------|-----|
| FLJ11767 | 79645  | NM_024593 | 1 | Weak+           |  | YES<br>YES               | D-016476-01<br>D-016476-02<br>D-016476-03<br>D-016476-04 | AAUGACA<br>CGUAAUG<br>GGUGACG<br>GAUUAUC  | Medium           |               |     |
| FLJ11806 | 79882  | NM_024824 | 1 | Medium          |  |                          | D-014468-01<br>D-014468-02<br>D-014468-03<br>D-014468-04 | CGACUAA<br>GUAGUCA<br>GACACGA<br>GAAAUGG  | Cytotoxic        | Did not score | YES |
| FLJ12606 | 79862  | NM_024804 | 1 | Weak+           |  | YES                      | D-014454-01<br>D-014454-02<br>D-014454-03<br>D-014454-04 | GAAGAGG<br>GUACGUC<br>GUAAGA<br>GAUACAA   | Cytotoxic Bypass | Weak+         |     |
| FLJ12671 | 81875  | NM_030980 | 1 | Weak<br>Weak    |  | YES<br>YES<br>YES        | D-014692-01<br>D-014692-02<br>D-014692-03<br>D-014692-04 | GGAAGAU<br>GGAGCUA<br>CGCCUAA<br>GGACCAA  | Medium           |               |     |
| FLJ22938 | 79729  | NM_024676 | 1 |                 |  |                          | D-016447-01<br>D-016447-02<br>D-016447-03<br>D-016447-04 | GAGAAGA<br>GAAAUGU<br>GAUCCCG<br>UGCAGAA  | Medium           |               |     |
| FLJ23518 | 79780  | NM_024725 | 1 | Weak            |  |                          | D-015438-01<br>D-015438-02<br>D-015438-03<br>D-015438-04 | GCUAACAA<br>UGACAGC<br>CACAUAU<br>UCAGGAG | Weak+            |               | YES |
| FLJ26184 | 388289 | NM_207385 | 1 | Medium<br>Weak+ |  | YES                      | D-032063-01<br>D-032063-02<br>D-032063-03<br>D-032063-04 | GGAUUUA<br>GUUAGCA<br>CCAGUGA<br>ACAAAGC  | Medium           |               |     |
| FLJ31846 | 160857 | NM_144974 | 1 |                 |  | YES<br>YES               | D-016742-01<br>D-016742-02<br>D-016742-03<br>D-016742-04 | AUACCAA<br>GAACCGA<br>GGAAGUA<br>CAUAGAA  | Cytotoxic Bypass | Medium        |     |
| FLJ33215 | 259282 | NM_148894 | 1 | Weak            |  |                          | D-017033-01<br>D-017033-02<br>D-017033-03<br>D-017033-04 | GGACAUG<br>GAAGUUG<br>CGACGAC<br>UUACAGA  | Weak             |               | YES |
| FLJ34907 | 284222 | XM_290817 | 1 | Medium          |  |                          | D-023377-01<br>D-023377-02<br>D-023377-03<br>D-023377-04 | CAAACGG<br>GACAUUU<br>UAUGCAA<br>GGAAAGU  | Weak             |               |     |
| FLJ35036 | 253461 | XM_172341 | 1 | Weak            |  |                          | D-023605-01<br>D-023605-02<br>D-023605-03<br>D-023605-04 | UGAGUGA<br>GAAAAUA<br>GGAUGUA<br>CAGAUAA  | Weak+            |               |     |
| FLJ35487 | 284505 | NM_173820 | 1 | Weak            |  | YES<br>YES<br>YES<br>YES | D-018167-01<br>D-018167-02<br>D-018167-03<br>D-018167-04 | CAACUAQ<br>GCCAGGA<br>UCACCUA<br>GAUCACCU | Weak+            |               |     |
| FLJ36032 | 284485 | XM_371311 | 1 | Weak+           |  |                          | D-021716-01<br>D-021716-02<br>D-021716-03<br>D-021716-04 | UAGAGUG<br>AGACAAC<br>GCAGACU<br>GCAGCUA  | Weak+            |               |     |

|          |        |           |   |        |           |                          |                                                          |                                              |           |       |  |
|----------|--------|-----------|---|--------|-----------|--------------------------|----------------------------------------------------------|----------------------------------------------|-----------|-------|--|
| FLJ40113 | 374650 | NM_198079 | 1 | Weak   |           |                          | D-031731-01<br>D-031731-02<br>D-031731-03<br>D-031731-04 | GCAGGGC<br>GUACAGA/<br>UCACUGG/<br>GGAGAGG   | Medium    |       |  |
| FLJ40321 | 284355 | NM_198479 | 1 | Weak   |           |                          | D-027234-01<br>D-027234-02<br>D-027234-03<br>D-027234-04 | GUUUUUC<br>AGGCCCA/<br>GCUCAGA/<br>GGGAUGA   | Weak+     |       |  |
| FUCA1    | 2517   | NM_000147 | 1 | Weak   | untreated | YES<br>YES               | D-009023-01<br>D-009023-02<br>D-009023-03<br>D-009023-04 | GAACAUC<br>GGAGGCA/<br>UCAAAGG/<br>UAACAAU   | Medium    |       |  |
| GAD1     | 2571   | NM_000817 | 1 | Weak+  |           | YES<br>YES               | D-010121-01<br>D-010121-02<br>D-010121-03<br>D-010121-04 | GCAGAGA/<br>UGACUUC/<br>GGACUA/<br>GAGAAGA/  | Strong    |       |  |
| GALNT7   | 51809  | NM_017423 | 1 | Weak+  |           | YES                      | D-013402-01<br>D-013402-02<br>D-013402-03<br>D-013402-04 | CAAAUCA/<br>CUCCAAC/<br>CGAGAGU/<br>UCAAAACU | Medium    |       |  |
| GGPS1    | 9453   | NM_004837 | 1 | Weak   |           | YES<br>YES<br>YES        | D-016477-01<br>D-016477-02<br>D-016477-03<br>D-016477-04 | UGACAGA/<br>GAAACAG/<br>CAAAUUA/<br>UAAAACCC | Cytotoxic | Weak+ |  |
| GLI3     | 2737   | NM_000168 | 1 | Medium |           |                          | D-011043-01<br>D-011043-02<br>D-011043-03<br>D-011043-04 | GCAUAUG/<br>GCACGAA/<br>GCACUAA/<br>GAAUUACI | Medium    |       |  |
| GMPR     | 2766   | NM_006877 | 1 | Weak+  |           | YES<br>YES<br>YES<br>YES | D-008258-01<br>D-008258-02<br>D-008258-03<br>D-008258-05 | UCACAGC/<br>CAGAAUG/<br>GAGCCGA/<br>UGCCACA/ | Weak+     |       |  |
| GOLGA2   | 2801   | NM_004486 | 1 | Weak+  |           |                          | D-017282-01<br>D-017282-02<br>D-017282-03<br>D-017282-04 | GGACAUA/<br>AGAAGGA/<br>GAAUAUC/<br>UUGUAAA/ | Medium    |       |  |
| GP6      | 51206  | NM_016363 | 1 | Medium |           | YES<br>YES<br>YES        | D-021356-01<br>D-021356-02<br>D-021356-03<br>D-021356-04 | GGACGUA/<br>CUACAAG/<br>GGCUGU/<br>GAACCAC/  | Weak+     |       |  |
| GPX5     | 2880   | NM_001509 | 1 | Weak   |           | YES<br>YES<br>YES        | D-009445-01<br>D-009445-02<br>D-009445-03<br>D-009445-04 | GUACCUA/<br>GAGAAAG/<br>GCAAGCA/<br>UGGCGUA/ | Medium    |       |  |
| GRIN2A   | 2903   | NM_000833 | 1 | Weak   |           |                          | D-006195-01<br>D-006195-02<br>D-006195-03<br>D-006195-04 | GAACAAU/<br>GACAAGA/<br>GAUCAUG/<br>UCAGAGA/ | Medium    |       |  |
| GRINA    | 2907   | XM_291268 | 1 | Medium |           | YES<br>YES<br>YES        | D-010697-01<br>D-010697-03<br>D-010697-04<br>D-010697-05 | GCUACGA/<br>GAGAAUG/<br>GCCAUUC/<br>GACCUACI | Weak+     |       |  |

|           |       |           |   |        |            |                                                          |                                          |        |  |     |
|-----------|-------|-----------|---|--------|------------|----------------------------------------------------------|------------------------------------------|--------|--|-----|
| GSTO1     | 9446  | NM_004832 | 1 | Weak+  | YES        | D-011950-01<br>D-011950-02<br>D-011950-03<br>D-011950-04 | GUAGGAA<br>GCAAUGA<br>GAGAAAG<br>UAGAGGA | Medium |  |     |
| H2AFB     | 83740 | XM_373381 | 1 | Weak   | YES        | D-024979-01<br>D-024979-02<br>D-024979-03<br>D-024979-04 | GAGCGGA<br>UCGCUGC<br>CGACCAC<br>UGGACAU | Weak+  |  |     |
| HERC1     | 8925  | NM_003922 | 1 | Medium | YES        | D-007181-01<br>D-007181-03<br>D-007181-04<br>D-007181-05 | GUGAAUA<br>GCAGUCA<br>GAAGAGA<br>UAGAUUA | Medium |  | YES |
| HIST1H2AM | 8336  | NM_003514 | 1 | Medium | YES<br>YES | D-011436-01<br>D-011436-02<br>D-011436-03<br>D-011436-04 | GGGCUCC<br>AGAGCCA<br>CCACAA<br>ACCACAA  | Weak+  |  |     |
| HIST1H4L  | 8368  | NM_003546 | 1 | Weak+  | YES<br>YES | D-011465-01<br>D-011465-02<br>D-011465-03<br>D-011465-04 | GCGCAUC<br>GUAUCC<br>GGAGACA<br>GUUCUGC  | Weak+  |  |     |
| HNRPL     | 3191  | NM_001533 | 1 | Weak+  | YES        | D-011293-01<br>D-011293-02<br>D-011293-03<br>D-011293-04 | CAUCAUG<br>GAAGAU<br>CCACGGA<br>GGAGUGA  | Medium |  |     |
| HNRPM     | 4670  | NM_005968 | 1 | Medium | YES        | D-013452-01<br>D-013452-02<br>D-013452-03<br>D-013452-04 | GCAAUCG<br>GAAUAAA<br>CCAACA<br>GAUGAGA  | Strong |  |     |
| HOXC11    | 3227  | NM_014212 | 1 | Medium |            | D-017602-01<br>D-017602-02<br>D-017602-03<br>D-017602-04 | CAACGUG<br>GCGCUGC<br>GCAAGUG<br>CGGAAA  | Weak+  |  |     |
| IDH1      | 3417  | NM_005896 | 1 | Weak+  |            | D-008294-01<br>D-008294-02<br>D-008294-03<br>D-008294-04 | GAGCAAA<br>GGACUUG<br>GUACAU<br>CAAGAU   | Medium |  |     |
| IFNA21    | 3452  | NM_002175 | 1 | Weak+  |            | D-019654-01<br>D-019654-02<br>D-019654-03<br>D-019654-04 | CAUGGAA<br>AAAUACA<br>AAGAGGA<br>CAAAGGA | Medium |  |     |
| IFNGR2    | 3460  | NM_005534 | 1 | Strong | YES<br>YES | D-012713-01<br>D-012713-02<br>D-012713-03<br>D-012713-04 | CAACAU<br>AAAUUA<br>GCACGAG<br>CCAAGCA   | Medium |  |     |
| IL1A      | 3552  | NM_000575 | 1 | Weak+  | YES<br>YES | D-007952-02<br>D-007952-03<br>D-007952-04<br>D-007952-05 | GGAUGAA<br>GAUCAUC<br>GAAAUCC<br>GGCCAAA | Weak+  |  |     |
| IMPA2     | 3613  | NM_014214 | 1 | Weak   | YES        | D-008348-01<br>D-008348-02<br>D-008348-03<br>D-008348-04 | UCAAAGG<br>UACAGAC<br>GGAUGCC<br>CUGCAGA | Weak+  |  |     |

|              |        |           |   |        |  |                   |                                                          |                                          |        |  |     |
|--------------|--------|-----------|---|--------|--|-------------------|----------------------------------------------------------|------------------------------------------|--------|--|-----|
| INPP5B       | 3633   | NM_005540 | 1 | Weak   |  |                   | D-021811-05<br>D-021811-06<br>D-021811-07<br>D-021811-08 | GAAGAGG<br>GCAUCUG<br>ACUUGGA<br>AACAGGA | Strong |  |     |
| INPP5F       | 22876  | NM_014937 | 1 | Medium |  | YES<br>YES<br>YES | D-020409-01<br>D-020409-02<br>D-020409-03<br>D-020409-04 | GCCAAUA<br>GGGAUCG<br>GGAUUAA<br>GAUAGUA | Weak+  |  |     |
| IPLA2(GAMMA) | 50640  | XM_291241 | 1 | Medium |  |                   | D-010284-01<br>D-010284-02<br>D-010284-03<br>D-010284-04 | GAAUAAC<br>CAUAUUA<br>CCAAAGC<br>GAUCUGC | Medium |  |     |
| IRAK2        | 3656   | NM_001570 | 1 | Weak   |  |                   | D-004761-01<br>D-004761-02<br>D-004761-03<br>D-004761-04 | GAAAUCA<br>GUCAAGA<br>CAGACGA<br>CAAAGCG | Strong |  |     |
| KCTD1        | 284252 | NM_198991 | 1 | Medium |  |                   | D-027276-01<br>D-027276-02<br>D-027276-03<br>D-027276-04 | CAUCAGG<br>GACGUGA<br>CGUCCCA<br>GAAAUCG | Weak   |  |     |
| KIAA0117     | 23029  | NM_015014 | 1 | Weak   |  |                   | D-022399-01<br>D-022399-02<br>D-022399-03<br>D-022399-04 | GAGUUGA<br>GUUGGGA<br>GGUCGCC<br>GGAAUCU | Weak+  |  | YES |
| KIAA0495     | 57212  | NM_207306 | 1 | Medium |  | YES<br>YES        | D-027524-01<br>D-027524-02<br>D-027524-03<br>D-027524-04 | GGAACAG<br>GAGCUGA<br>CGGCCAC<br>UCCAGCA | Weak+  |  |     |
| KIAA0748     | 9840   | XM_374983 | 1 | Medium |  | YES               | D-021265-01<br>D-021265-02<br>D-021265-03<br>D-021265-04 | GAACUGC<br>CAAGUUG<br>GUUCAAG<br>CCCAAAC | Medium |  |     |
| KIAA1068     | 23386  | NM_015332 | 1 | Medium |  |                   | D-014018-01<br>D-014018-02<br>D-014018-03<br>D-014018-04 | GGUCACA<br>GAUCAAC<br>GCAAGGU<br>GCUGAAA | Weak+  |  | YES |
| KIAA2010     | 55671  | NM_032560 | 1 | Weak+  |  | YES<br>YES        | D-019093-01<br>D-019093-02<br>D-019093-03<br>D-019093-04 | GGGCAUA<br>GGAAGAU<br>GCGAAGU<br>UCGUGGG | Weak+  |  |     |
| KIAA2018     | 205717 | XM_291062 | 1 | Medium |  | YES<br>YES        | D-023709-01<br>D-023709-02<br>D-023709-03<br>D-023709-04 | CCAGUUG<br>AACAGUA<br>UAACUAC<br>UGGCAUG | Weak   |  | YES |
| KLK1         | 3816   | NM_002257 | 1 | Medium |  | YES               | D-005906-01<br>D-005906-02<br>D-005906-03<br>D-005906-04 | UCAGAGU<br>CAACUUG<br>AGGCGGC<br>UGCAGAA | Medium |  |     |
| KPNA3        | 3839   | NM_002267 | 1 | Weak   |  | YES               | D-011306-01<br>D-011306-02<br>D-011306-03<br>D-011306-04 | GCAACAA<br>GAUAAUG<br>GAACGUC<br>CAAUUGU | Medium |  |     |

|           |        |             |   |                  |           |                          |                                                          |                                           |                  |               |  |
|-----------|--------|-------------|---|------------------|-----------|--------------------------|----------------------------------------------------------|-------------------------------------------|------------------|---------------|--|
| KRT24     | 192666 | NM_019016   | 1 | Weak             |           |                          | D-021177-01<br>D-021177-02<br>D-021177-03<br>D-021177-04 | GCACAAU<br>GAUCAUU<br>GGUAUCU<br>UCAAGCA  | Weak+            |               |  |
| KRTAP5-1  | 387264 | NM_00100592 | 1 | Strong<br>Strong | untreated | YES<br>YES               | D-032497-01<br>D-032497-02<br>D-032497-03<br>D-032497-04 | UAAAGGA<br>GUGUGUU<br>GGCUGUG<br>GGUUCUG  | Medium           |               |  |
| LEMD3     | 23592  | NM_014319   | 1 | Weak             |           |                          | D-006306-01<br>D-006306-02<br>D-006306-03<br>D-006306-04 | GGAUAGA<br>GAACUUC<br>GGAAUAA<br>CAAGGCA  | Weak+            |               |  |
| LMAN2     | 10960  | NM_006816   | 1 | Medium           |           | YES<br>YES               | D-019905-01<br>D-019905-02<br>D-019905-03<br>D-019905-04 | GGAUUAU<br>GAAUUGC<br>GUGAACAI<br>GCAUUGA | Medium           |               |  |
| LOC130940 | 130940 | NM_138803   | 1 | Medium           |           |                          | D-018279-01<br>D-018279-02<br>D-018279-03<br>D-018279-04 | GAGAAAG<br>GAACAAC<br>GGACAUG<br>AUUAAUC  | Medium           |               |  |
| LOC134492 | 134492 | NM_145266   | 1 | Weak             |           | YES<br>YES<br>YES        | D-016043-01<br>D-016043-02<br>D-016043-03<br>D-016043-04 | GCAGAGA<br>GCAGCAA<br>GAAACUA<br>CCUCAAG  | Weak+            |               |  |
| LOC144776 | 144776 | XM_375033   | 1 | Weak<br>Weak     |           | YES<br>YES<br>YES<br>YES | D-030181-01<br>D-030181-02<br>D-030181-03<br>D-030181-04 | GGAGCCA<br>CAACCAU<br>GCCAGUG<br>GCUGCAA  | Weak+            |               |  |
| LOC148213 | 148213 | NM_138286   | 1 | Weak+            | untreated | YES<br>YES               | D-015352-01<br>D-015352-02<br>D-015352-03<br>D-015352-04 | UAAUGGA<br>GCAAGGC<br>GGACAUU<br>CGUCACA  | Medium           |               |  |
| LOC158381 | 158381 | XM_376829   | 1 | Weak             |           | YES<br>YES               | D-029548-01<br>D-029548-02<br>D-029548-03<br>D-029548-04 | CAGGAUU<br>CAACCAG<br>GCAGAUU<br>CCAUAUA  | Cytotoxic Bypass | Medium        |  |
| LOC166752 | 166752 | XM_094074   | 1 | Medium           |           |                          | D-024053-01<br>D-024053-02<br>D-024053-03<br>D-024053-04 | UCACUGA<br>GAAGUGA<br>GAUGCUG<br>GGGAAUA  | Strong           |               |  |
| LOC201475 | 201475 | XM_113967   | 1 | Medium           |           | YES<br>YES<br>YES        | D-023375-01<br>D-023375-02<br>D-023375-03<br>D-023375-04 | GAAGCAA<br>AGGAAUG<br>GAGAGAU<br>UCACUAA  | Cytotoxic Bypass | Did not score |  |
| LOC221140 | 221140 | XM_167908   | 1 | Medium<br>Medium |           | YES<br>YES               | D-021677-01<br>D-021677-02<br>D-021677-03<br>D-021677-04 | AGACAGC<br>GCAGAAU<br>CGGCAGU<br>GGUGCAU  | Strong           |               |  |
| LOC253039 | 253039 | BC052374    | 1 | Medium           |           | YES<br>YES<br>YES        | D-032270-01<br>D-032270-02<br>D-032270-03<br>D-032270-04 | CCAGUAG<br>GGAUGAA<br>GCAGUGG<br>GAAGUUA  | Medium           |               |  |

|           |        |           |   |                |  |                   |                                                          |                                          |        |  |  |
|-----------|--------|-----------|---|----------------|--|-------------------|----------------------------------------------------------|------------------------------------------|--------|--|--|
| LOC253289 | 253289 | XM_171165 | 1 | Weak           |  |                   | D-025271-01<br>D-025271-02<br>D-025271-03<br>D-025271-04 | GGAGAAG<br>AGACAAU<br>CACCAGU<br>GCCGAGA | Weak+  |  |  |
| LOC283116 | 283116 | XM_208043 | 1 | Medium         |  | YES               | D-026798-01<br>D-026798-02<br>D-026798-03<br>D-026798-04 | GAAGAAG<br>CCACUUC<br>CAAGAUG<br>GCCCAUU | Weak+  |  |  |
| LOC283604 | 283604 | XM_211088 | 1 | Weak+          |  | YES               | D-022005-01<br>D-022005-02<br>D-022005-03<br>D-022005-04 | GCACCCU<br>GCUCAGG<br>CCGCAGA<br>CCGGCUG | Medium |  |  |
| LOC284546 | 284546 | XM_209252 | 1 | Medium         |  |                   | D-021794-01<br>D-021794-02<br>D-021794-03<br>D-021794-04 | UCGCAGC<br>UCAUACU<br>UAUCAAC<br>CUGAAAG | Medium |  |  |
| LOC285331 | 285331 | XM_376238 | 1 | Medium         |  | YES               | D-028111-01<br>D-028111-02<br>D-028111-03<br>D-028111-04 | GCAAACA<br>GAAGAAA<br>CGACAGC<br>CCGCAGA | Medium |  |  |
| LOC285889 | 285889 | XM_379535 | 1 | Weak           |  | YES               | D-028753-01<br>D-028753-02<br>D-028753-03<br>D-028753-04 | GAAGGAA<br>GUUUGAA<br>GUAAUUA<br>GGGAGAG | Medium |  |  |
| LOC286087 | 286087 | AK091675  | 1 | Weak           |  | YES<br>YES<br>YES | D-032283-01<br>D-032283-02<br>D-032283-03<br>D-032283-04 | CACGAGA<br>GGUAAAA<br>UGACGUC<br>GCUCUUA | Weak+  |  |  |
| LOC286442 | 286442 | XM_379700 | 1 | Strong         |  | YES<br>YES        | D-031665-01<br>D-031665-02<br>D-031665-03<br>D-031665-04 | UCACAAA<br>AGAAUUG<br>CAGAUUG<br>UAGCAUG | Weak+  |  |  |
| LOC339321 | 339321 | XM_290831 | 1 | Weak+          |  | YES               | D-023650-01<br>D-023650-02<br>D-023650-03<br>D-023650-04 | GCUCAGC<br>GGUACAA<br>CGCACGG<br>CCACCUC | Weak+  |  |  |
| LOC339476 | 339476 | XM_378923 | 1 | Medium         |  | YES<br>YES<br>YES | D-027548-01<br>D-027548-02<br>D-027548-03<br>D-027548-04 | GGAAACA<br>CCACAGC<br>CCACAAU<br>GGCUGGG | Weak+  |  |  |
| LOC339862 | 339862 | XM_376212 | 1 | Medium         |  | YES               | D-028079-01<br>D-028079-02<br>D-028079-03<br>D-028079-04 | GCAGAAC<br>CCAGAUU<br>UCACUUU<br>AGUGGAG | Medium |  |  |
| LOC340359 | 340359 | XM_294387 | 1 | Medium<br>Weak |  | YES               | D-025931-01<br>D-025931-02<br>D-025931-03<br>D-025931-04 | GGAGGAU<br>CGACUUC<br>GAUCGUC<br>CCAGGGA | Strong |  |  |
| LOC341371 | 341371 | XM_292029 | 1 | Weak           |  | YES               | D-027052-01<br>D-027052-02<br>D-027052-03<br>D-027052-04 | GAAAGAU<br>GCUAAUA<br>UGAAUUA<br>GACAUUG | Weak+  |  |  |

|           |        |           |   |                |           |            |                                                          |                                          |        |  |     |
|-----------|--------|-----------|---|----------------|-----------|------------|----------------------------------------------------------|------------------------------------------|--------|--|-----|
| LOC374395 | 374395 | NM_199337 | 1 | Weak           |           | YES        | D-032107-01<br>D-032107-02<br>D-032107-03<br>D-032107-04 | GGUCACG<br>GCUAUAG<br>GAAACCU<br>GAACACU | Weak+  |  |     |
| LOC387643 | 387643 | XM_370537 | 1 | Weak+          |           | YES<br>YES | D-029773-01<br>D-029773-02<br>D-029773-03<br>D-029773-04 | GUGCAGA<br>ACAAGCA<br>CCAGGCA<br>CCAACAG | Weak+  |  |     |
| LOC387723 | 387723 | XM_370586 | 1 | Weak+          |           | YES        | D-029797-01<br>D-029797-02<br>D-029797-03<br>D-029797-04 | GCAUUA<br>GAGGCUA<br>GACGUGG<br>AUUAGAA  | Weak+  |  |     |
| LOC387763 | 387763 | XM_373497 | 1 | Weak           |           | YES        | D-029981-01<br>D-029981-02<br>D-029981-03<br>D-029981-04 | GGAGAGA<br>UAAACAA<br>GUUGAAA<br>CGUUUGG | Weak   |  | YES |
| LOC387821 | 387821 | XM_373518 | 1 | Weak+          |           |            | D-029826-01<br>D-029826-02<br>D-029826-03<br>D-029826-04 | GGACCAC<br>CCCAUUC<br>GAUCAUC<br>GGACGUU | Strong |  |     |
| LOC387845 | 387845 | XM_370684 | 1 | Weak           |           | YES        | D-030125-01<br>D-030125-02<br>D-030125-03<br>D-030125-04 | CAAAGCC<br>UCACUUU<br>CCAUGGG<br>CCCUUGU | Weak+  |  |     |
| LOC387983 | 387983 | XM_373588 | 1 | Weak+          |           | YES        | D-030282-01<br>D-030282-02<br>D-030282-03<br>D-030282-04 | GAUGCAG<br>GCAGAUU<br>GAACUAA<br>GAAGGAC | Weak+  |  |     |
| LOC388171 | 388171 | XM_373647 | 1 | Weak           |           | YES        | D-030485-01<br>D-030485-02<br>D-030485-03<br>D-030485-04 | GUAGUGG<br>CCAAAUG<br>CUGAUUU<br>GCGGACC | Strong |  |     |
| LOC388278 | 388278 | XM_373687 | 1 | Weak           |           | YES        | D-030625-01<br>D-030625-02<br>D-030625-03<br>D-030625-04 | AAUGGGA<br>GAAGGUC<br>GCAAGUA<br>GAACCAG | Weak+  |  |     |
| LOC388454 | 388454 | XM_373770 | 1 | Medium         |           | YES        | D-031006-01<br>D-031006-02<br>D-031006-03<br>D-031006-04 | GGACAAA<br>GAAAGCC<br>CCUCGUA<br>GUCCAGA | Medium |  |     |
| LOC388642 | 388642 | XM_371261 | 1 | Weak<br>Weak+  | untreated | YES        | D-027404-01<br>D-027404-02<br>D-027404-03<br>D-027404-04 | GUACUCC<br>GAGCUCG<br>GGAAGUA<br>GAGCCUG | Medium |  |     |
| LOC388650 | 388650 | XM_371269 | 1 | Medium<br>Weak |           |            | D-027412-01<br>D-027412-02<br>D-027412-03<br>D-027412-04 | CAUAUGU<br>ACAAUCA<br>GAAGUGA<br>UAUUAAG | Weak+  |  |     |
| LOC388929 | 388929 | XM_371480 | 1 | Weak           |           |            | D-027811-01<br>D-027811-02<br>D-027811-03<br>D-027811-04 | CAUCUGG<br>GGACUAA<br>GUAGAUG<br>GCGAUGU | Medium |  |     |



|           |        |           |   |        |           |                   |                                                          |                                          |                  |       |  |
|-----------|--------|-----------|---|--------|-----------|-------------------|----------------------------------------------------------|------------------------------------------|------------------|-------|--|
| LOC389031 | 389031 | XM_371555 | 1 | Weak   | untreated | YES               | D-027951-01<br>D-027951-02<br>D-027951-03<br>D-027951-04 | GGAAGUA<br>UCAACAG<br>GCUACAC<br>UCCGAUA | Weak+            |       |  |
| LOC389107 | 389107 | XM_371626 | 1 | Weak   |           |                   | D-028093-01<br>D-028093-02<br>D-028093-03<br>D-028093-04 | CAACCUA<br>CGAAGCC<br>CAAGGAA<br>GCAACAA | Weak+            |       |  |
| LOC389288 | 389288 | XM_374120 | 1 | Weak   |           | YES               | D-028517-01<br>D-028517-02<br>D-028517-03<br>D-028517-04 | GAACAAA<br>GAGCAAG<br>GGUGUCG<br>GGGUUUA | Weak+            |       |  |
| LOC389428 | 389428 | XM_371846 | 1 | Weak   |           | YES               | D-028596-01<br>D-028596-02<br>D-028596-03<br>D-028596-04 | AAAGACG<br>AAGAAGA<br>AGAAGAC<br>CAGCAUA | Medium           |       |  |
| LOC389642 | 389642 | XM_374261 | 1 | Medium |           | YES               | D-029231-01<br>D-029231-02<br>D-029231-03<br>D-029231-04 | GGACUUA<br>GGGCCAG<br>GGAUACC<br>GCAGAAG | Weak+            |       |  |
| LOC389676 | 389676 | XM_374276 | 1 | Weak   |           | YES<br>YES        | D-029343-01<br>D-029343-02<br>D-029343-03<br>D-029343-04 | GGAAGGC<br>GUGAAAC<br>AACCUUG<br>GAGGAUG | Weak+            |       |  |
| LOC390299 | 390299 | XM_372452 | 1 | Medium | untreated | YES<br>YES        | D-030139-01<br>D-030139-02<br>D-030139-03<br>D-030139-04 | CCAUCUA<br>GAACCUA<br>GGCAAUA<br>AAGACUC | Medium           |       |  |
| LOC390377 | 390377 | XM_372486 | 1 | Medium |           | YES<br>YES<br>YES | D-030242-01<br>D-030242-02<br>D-030242-03<br>D-030242-04 | GAGCUGG<br>UGAGCGU<br>GGACCAA<br>GCUACAC | Cytotoxic Bypass | Weak+ |  |
| LOC390502 | 390502 | XM_372532 | 1 | Weak   |           | YES               | D-030366-01<br>D-030366-02<br>D-030366-03<br>D-030366-04 | GCCAGAA<br>UAACAAG<br>UCAGAGU<br>CAAGAUC | Strong           |       |  |
| LOC391001 | 391001 | XM_372761 | 1 | Medium |           | YES               | D-027644-01<br>D-027644-02<br>D-027644-03<br>D-027644-04 | GUAGAUC<br>CAUAGAU<br>GCCCGUA<br>GUUAUGA | Weak+            |       |  |
| LOC391707 | 391707 | XM_373036 | 1 | Medium |           | YES<br>YES<br>YES | D-028279-01<br>D-028279-02<br>D-028279-03<br>D-028279-04 | GAGGAAA<br>CAAGUUG<br>UCAUAAA<br>GCUCCAC | Weak+            |       |  |
| LOC392726 | 392726 | XM_374734 | 1 | Weak   |           | YES               | D-029100-01<br>D-029100-02<br>D-029100-03<br>D-029100-04 | GGCAGAG<br>CACCUCU<br>CCACUUA<br>AGAGAGU | Weak+            |       |  |
| LOC399844 | 399844 | XM_374858 | 1 | Medium |           | YES               | D-029930-01<br>D-029930-02<br>D-029930-03<br>D-029930-04 | CCUCGUG<br>CAACUUC<br>CCAGAUG<br>GCGAAGC | Medium           |       |  |

|           |        |           |   |               |           |                   |                                                          |                                              |           |               |  |
|-----------|--------|-----------|---|---------------|-----------|-------------------|----------------------------------------------------------|----------------------------------------------|-----------|---------------|--|
| LOC400121 | 400121 | XM_375018 | 1 | Medium        |           | YES<br>YES<br>YES | D-030216-01<br>D-030216-02<br>D-030216-03<br>D-030216-04 | GGAAAUAA<br>GUAGAUCA<br>UAAAGAA<br>GUAUCAG   | Medium    |               |  |
| LOC400586 | 400586 | XM_375424 | 1 | Weak          |           | YES               | D-030973-01<br>D-030973-02<br>D-030973-03<br>D-030973-04 | GGGAGAA<br>GAGUACCA<br>AAACCCGG<br>CUUCAGAA  | Weak+     |               |  |
| LOC400643 | 400643 | XM_378738 | 1 | Weak+         |           | YES               | D-031017-01<br>D-031017-02<br>D-031017-03<br>D-031017-04 | GGAAAGGC<br>UUCCAAAC<br>CCACCGAG<br>GAACUCUC | Weak+     |               |  |
| LOC400733 | 400733 | XM_378835 | 1 | Weak+         |           | YES<br>YES<br>YES | D-027390-01<br>D-027390-02<br>D-027390-03<br>D-027390-04 | GGAGAAA<br>CCGCCAAA<br>CUCACGAA<br>GUUCACAA  | Medium    |               |  |
| LOC400950 | 400950 | XM_376049 | 1 | Weak+         |           | YES               | D-027830-01<br>D-027830-02<br>D-027830-03<br>D-027830-04 | GGACCAA<br>GAGUUUA<br>GACCAUUA<br>CCAACAA    | Medium    |               |  |
| LOC401222 | 401222 | XM_379380 | 1 | Weak<br>Weak+ |           | YES               | D-028560-01<br>D-028560-02<br>D-028560-03<br>D-028560-04 | GGUGUCA<br>GGACGCG<br>AAGCCGAA<br>GAGCUUC    | Medium    |               |  |
| LOC401286 | 401286 | XM_376555 | 1 | Weak+         |           | YES<br>YES        | D-028648-01<br>D-028648-02<br>D-028648-03<br>D-028648-04 | CUAAAGAA<br>CAACACAA<br>CAAAGCAA<br>GGAACGCA | Weak+     |               |  |
| LOC401471 | 401471 | XM_379595 | 1 | Medium        |           | YES<br>YES<br>YES | D-029346-01<br>D-029346-02<br>D-029346-03<br>D-029346-04 | GCAAAACA<br>GGAAACA<br>GUUGUGG<br>AAUCAUG    | Weak+     |               |  |
| LOC91614  | 91614  | NM_139160 | 1 | Weak+         |           |                   | D-016878-01<br>D-016878-02<br>D-016878-03<br>D-016878-04 | GAUAGUA<br>GCUUAUG<br>AGACGGA<br>CCGAACA     | Medium    |               |  |
| LRRK1     | 79705  | NM_024652 | 1 | Weak+<br>Weak | untreated | YES               | D-005320-01<br>D-005320-03<br>D-005320-04<br>D-005320-05 | GAUCAGG<br>ACAGGAA<br>CAAGAACT<br>CAGAGAU    | Weak+     |               |  |
| LYPLAL1   | 127018 | NM_138794 | 1 | Medium        |           | YES               | D-008388-01<br>D-008388-02<br>D-008388-03<br>D-008388-04 | GGACAAG<br>CCACGAA<br>CAAUUGAA<br>GCAGAUG    | Medium    |               |  |
| MAF1      | 84232  | NM_032272 | 1 | Weak          |           | YES<br>YES<br>YES | D-018603-01<br>D-018603-02<br>D-018603-03<br>D-018603-04 | UCAAGGA<br>GGUAGCC<br>ACAAGCG<br>UUGGCAG     | Cytotoxic | Did not score |  |
| MAGEB1    | 4112   | NM_002363 | 1 | Weak          |           |                   | D-011325-01<br>D-011325-02<br>D-011325-03<br>D-011325-04 | CAAGUCC<br>GAGAGGA<br>UACCGAA<br>GCUGAUG     | Medium    |               |  |

|           |        |           |   |              |           |                   |                                                          |                                           |                  |               |     |
|-----------|--------|-----------|---|--------------|-----------|-------------------|----------------------------------------------------------|-------------------------------------------|------------------|---------------|-----|
| MARCH3    | 115123 | NM_178450 | 1 | Medium       |           | YES<br>YES<br>YES | D-007116-01<br>D-007116-02<br>D-007116-03<br>D-007116-04 | UGAAGAC<br>GCGCAA<br>GUCGCAC<br>CACCUGC   | Cytotoxic Bypass | Strong        |     |
| METTL3    | 56339  | NM_019852 | 1 | Weak         |           | YES<br>YES        | D-005170-01<br>D-005170-02<br>D-005170-03<br>D-005170-04 | GAACAGG<br>GGUAUCA<br>GAUGAAA<br>CAGCACAC | Medium           |               | YES |
| MGC:13379 | 51259  | NM_016499 | 1 | Weak+        |           |                   | D-017173-01<br>D-017173-02<br>D-017173-03<br>D-017173-04 | UGAAGUA<br>CGAAAGA<br>CAUGAUG<br>GUCGCUU  | Medium           |               |     |
| MGC10485  | 112936 | NM_052875 | 1 | Weak         |           |                   | D-015152-01<br>D-015152-02<br>D-015152-03<br>D-015152-04 | UCAAAGA<br>CCAAAUAC<br>GAAGUUC<br>CCAUGAG | Weak             |               | YES |
| MGC12965  | 374408 | NM_198519 | 1 | Weak         |           | YES<br>YES        | D-031766-01<br>D-031766-02<br>D-031766-03<br>D-031766-04 | UGUCUGA<br>UAUAUGA<br>UUAAGA<br>GAUCGUG   | Weak+            |               |     |
| MGC14798  | 89978  | NM_080650 | 1 | Weak         |           |                   | D-031880-01<br>D-031880-02<br>D-031880-03<br>D-031880-04 | GGACAGC<br>GGAUUGC<br>GUGCUAU<br>CAGAAGU  | Weak+            |               |     |
| MGC26710  | 150280 | NM_152510 | 1 | Medium       |           | YES               | D-016850-01<br>D-016850-02<br>D-016850-03<br>D-016850-04 | GAAGAAG<br>GAACAGC<br>CCAAAUCA<br>CCGGGUC | Weak+            |               |     |
| MMP27     | 64066  | NM_022122 | 1 | Medium       | untreated | YES<br>YES        | D-005966-01<br>D-005966-02<br>D-005966-03<br>D-005966-04 | CCAAGAA<br>CCAAAUCC<br>GAAUAGG<br>UCACGGA | Weak+            |               |     |
| MTB       | 54892  | NM_017760 | 1 | Medium       |           | YES               | D-018283-01<br>D-018283-02<br>D-018283-03<br>D-018283-04 | CAGCCUA<br>GCAGACG<br>GCCAAAC<br>UAGCAA   | Medium           |               |     |
| MUC5B     | 4587   | XM_039877 | 1 | Weak<br>Weak |           | YES               | D-026763-01<br>D-026763-02<br>D-026763-03<br>D-026763-04 | GACGUUG<br>CCGAUGG<br>GCGGAGA<br>GGUCAGA  | Medium           |               |     |
| MX2       | 4600   | NM_002463 | 1 | Weak         |           | YES               | D-011736-01<br>D-011736-02<br>D-011736-03<br>D-011736-04 | GAGCACG<br>GAAUUUA<br>GAAUGAG<br>GGGACGC  | Weak+            |               |     |
| MYST2     | 11143  | NM_007067 | 1 | Weak         |           | YES<br>YES<br>YES | D-017668-01<br>D-017668-02<br>D-017668-03<br>D-017668-04 | GAAAUGC<br>GAACCGA<br>AGAGGCA<br>GAUGCCC  | Cytotoxic        | Did not score | YES |
| NALP14    | 338323 | NM_176822 | 1 | Weak+        |           | YES               | D-019075-01<br>D-019075-02<br>D-019075-03<br>D-019075-04 | GAAUAUG<br>GAACAAC<br>GAAUUGG<br>UAUCCAA  | Medium           |               |     |

|          |        |             |   |                           |           |                   |                                                          |                                             |        |  |     |
|----------|--------|-------------|---|---------------------------|-----------|-------------------|----------------------------------------------------------|---------------------------------------------|--------|--|-----|
| NCOA1    | 8648   | NM_003743   | 1 | Weak+                     |           | YES<br>YES<br>YES | D-005196-01<br>D-005196-02<br>D-005196-03<br>D-005196-05 | CGAAAUAA<br>CAGAUGAA<br>GAAUGUAA<br>GGUGUAG | Weak   |  | YES |
| NDUFB3   | 4709   | NM_002491   | 1 | Weak                      |           |                   | D-019604-01<br>D-019604-02<br>D-019604-03<br>D-019604-04 | GAUAGAA<br>CAAUGAA<br>UGUAGGA<br>UGGAGUC    | Medium |  |     |
| NFE2L3   | 9603   | NM_004289   | 1 | Weak<br>Weak              | untreated | YES               | D-009308-01<br>D-009308-02<br>D-009308-03<br>D-009308-04 | GCGUAGA<br>GCACGAA<br>GAAAUGA<br>GCAGUUA    | Medium |  |     |
| NOTCH2   | 4853   | NM_024408   | 1 | Medium                    |           | YES<br>YES<br>YES | D-012235-01<br>D-012235-02<br>D-012235-03<br>D-012235-04 | GAUGCUA<br>GUGAGUG<br>GGUCAGC<br>GCAUUAA    | Medium |  |     |
| NOTCH2NL | 388677 | NM_203458   | 1 | Medium                    |           | YES<br>YES        | D-032019-01<br>D-032019-02<br>D-032019-03<br>D-032019-04 | GCAAAUG<br>GGAUUUU<br>AAGAACA<br>GCAAAUG    | Weak+  |  |     |
| NP220    | 27332  | NM_014497   | 1 | Medium                    |           |                   | D-013715-01<br>D-013715-02<br>D-013715-03<br>D-013715-04 | UAACGUA<br>GAAUGGA<br>UACCAGA<br>GAAUGAG    | Weak   |  | YES |
| NUDT14   | 256281 | NM_177533   | 1 | Medium                    |           | YES<br>YES        | D-009076-01<br>D-009076-02<br>D-009076-03<br>D-009076-04 | GGACGGG<br>UGGAGGA<br>GGAGCCU<br>AGACAGA    | Medium |  |     |
| OIT3     | 170392 | NM_152635   | 1 | Weak+<br>Medium<br>Medium | untreated | YES<br>YES        | D-016942-01<br>D-016942-02<br>D-016942-03<br>D-016942-04 | GUUGAAG<br>CCACGCC<br>CUACAGG<br>GCACGUG    | Medium |  |     |
| OR51G2   | 81282  | NM_00100523 | 1 | Medium                    |           | YES<br>YES        | D-032428-01<br>D-032428-02<br>D-032428-03<br>D-032428-04 | AAACAGA<br>GGUUGGA<br>CCGGGCA<br>CUUAUUG    | Medium |  |     |
| OS-9     | 10956  | NM_006812   | 1 | Medium                    |           |                   | D-010811-01<br>D-010811-02<br>D-010811-03<br>D-010811-04 | GGACAUAA<br>GGAAACA<br>GGACGAA<br>AAGGAGA   | Medium |  |     |
| P2RX3    | 5024   | NM_002559   | 1 | Medium                    |           | YES<br>YES        | D-006284-01<br>D-006284-02<br>D-006284-03<br>D-006284-04 | GAUCAUC<br>UCAUGGA<br>CCAAGAU<br>GAGAAGC    | Medium |  |     |
| PARD6G   | 84552  | NM_032510   | 1 | Weak                      |           | YES<br>YES<br>YES | D-014909-01<br>D-014909-02<br>D-014909-03<br>D-014909-04 | CACCAUA<br>GCAAGGC<br>UCAUAAG<br>GAACCGA    | Medium |  |     |
| PCDH18   | 54510  | NM_019035   | 1 | Weak                      |           | YES<br>YES        | D-013372-01<br>D-013372-02<br>D-013372-03<br>D-013372-04 | GAGUAUA<br>GAAUGGG<br>GGGCCUG<br>GAUAUGC    | Medium |  |     |

|         |       |           |   |               |           |            |                                                          |                                           |                  |               |     |
|---------|-------|-----------|---|---------------|-----------|------------|----------------------------------------------------------|-------------------------------------------|------------------|---------------|-----|
| PCDHA2  | 56146 | NM_018905 | 1 | Weak+         |           | YES        | D-013260-01<br>D-013260-02<br>D-013260-03<br>D-013260-04 | GAACAGC<br>GCAAAGU<br>GAGGUUA<br>GAUGUGU  | Medium           |               |     |
| PDZK6   | 27152 | NM_015693 | 1 | Weak          |           | YES        | D-031873-01<br>D-031873-02<br>D-031873-03<br>D-031873-04 | GACAUGA<br>CACCACCA<br>UGAAUGA<br>GCGAGUA | Weak+            |               |     |
| PER1    | 5187  | NM_002616 | 1 | Medium        |           | YES        | D-011350-01<br>D-011350-02<br>D-011350-03<br>D-011350-04 | GAACCAG<br>GAAGCGC<br>GGCCGAA<br>UUACGAA  | Medium           |               | YES |
| PEX14   | 5195  | NM_004565 | 1 | Weak          |           | YES        | D-012676-01<br>D-012676-02<br>D-012676-03<br>D-012676-04 | GAACUCA<br>CCUCAUA<br>CCAGACA<br>AGGCAUU  | Medium           |               |     |
| PHTF2   | 57157 | NM_020432 | 1 | Medium        |           | YES        | D-013848-01<br>D-013848-02<br>D-013848-03<br>D-013848-04 | GAAACAG<br>GUUAUGG<br>AUGAAA<br>AAUAAGU   | Medium           |               |     |
| PLEC1   | 5339  | NM_000445 | 1 | Weak          |           |            | D-003945-01<br>D-003945-03<br>D-003945-04<br>D-003945-05 | GAGCUAA<br>CCACUAA<br>GCACUGC<br>GAAAUAC  | Medium           |               | YES |
| PLEKHM1 | 9842  | NM_014798 | 1 | Medium        |           |            | D-023203-01<br>D-023203-02<br>D-023203-03<br>D-023203-04 | CUACAAG<br>GCAAAGU<br>GAACGCG<br>GAUAGCU  | Medium           |               |     |
| PMS2    | 5395  | NM_000535 | 1 | Medium        |           | YES        | D-010032-01<br>D-010032-02<br>D-010032-03<br>D-010032-04 | GAACUCG<br>GGAUGUA<br>GGAAGGA<br>CAAUGUU  | Strong           |               |     |
| POLE2   | 5427  | NM_002692 | 1 | Weak          |           | YES        | D-018612-01<br>D-018612-02<br>D-018612-03<br>D-018612-04 | CCACAGG<br>GAUCAAG<br>GCAUAAU<br>CGUGAAG  | Cytotoxic        | Did not score |     |
| POLK    | 51426 | NM_016218 | 1 | Weak          |           | YES        | D-021038-01<br>D-021038-02<br>D-021038-03<br>D-021038-04 | GUACAGA<br>GAUGAAG<br>GGAUGGG<br>GUAGAAC  | Cytotoxic Bypass | Weak          |     |
| PPGB    | 5476  | NM_000308 | 1 | Weak+<br>Weak | untreated | YES<br>YES | D-006004-01<br>D-006004-02<br>D-006004-03<br>D-006004-04 | GCAAUGG<br>GGAACAG<br>GACAUGG<br>CUACUCC  | Medium           |               |     |
| PPP1R2  | 5504  | NM_006241 | 1 | Weak          |           | YES        | D-015361-01<br>D-015361-02<br>D-015361-03<br>D-015361-04 | GAAGAUG<br>CAUCUUA<br>AACAAAG<br>GCCAGAC  | Medium           |               |     |
| PQLC1   | 80148 | NM_025078 | 1 | Weak          |           |            | D-018387-01<br>D-018387-02<br>D-018387-03<br>D-018387-04 | UCACCUA<br>GCAGAGC<br>GGAGCAG<br>UCAAGAU  | Medium           |               |     |

|        |        |           |   |        |           |                          |                                                          |                                           |           |               |     |
|--------|--------|-----------|---|--------|-----------|--------------------------|----------------------------------------------------------|-------------------------------------------|-----------|---------------|-----|
| PSMC6  | 5706   | NM_002806 | 1 | Weak   |           |                          | D-009570-01<br>D-009570-02<br>D-009570-03<br>D-009570-04 | CUAAGAA<br>GAACAGAA<br>GGAGUUA<br>GUGAUAG | Cytotoxic | Did not score |     |
| PTBP2  | 58155  | NM_021190 | 1 | Weak   |           | YES                      | D-021323-01<br>D-021323-02<br>D-021323-03<br>D-021323-04 | GAGAGGA<br>GAAAGACA<br>UAAGAAA<br>GGAAGCA | Weak+     |               |     |
| PTPN21 | 11099  | NM_007039 | 1 | Weak+  |           | YES<br>YES<br>YES<br>YES | D-009379-02<br>D-009379-03<br>D-009379-04<br>D-009379-05 | GGAUCCA<br>CCACAGG<br>UAAACUG<br>GAGCGUG  | Weak+     |               |     |
| RAB22A | 57403  | NM_020673 | 1 | Strong |           |                          | D-019214-01<br>D-019214-02<br>D-019214-03<br>D-019214-04 | GUAGGUA<br>GGACUAC<br>CCUUAGC<br>CGCGAUA  | Weak+     |               |     |
| RAB34  | 83871  | NM_031934 | 1 | Weak+  |           | YES                      | D-009735-01<br>D-009735-02<br>D-009735-03<br>D-009735-04 | AGACUUG<br>AGAAGAA<br>CAGGAGA<br>AGAAUGA  | Strong    |               |     |
| RAB43  | 339122 | XM_290714 | 1 | Weak   |           | YES<br>YES               | D-028161-01<br>D-028161-02<br>D-028161-03<br>D-028161-04 | UAUGC<br>CCACGGA<br>GCAAGGA<br>GCAAGCG    | Medium    |               |     |
| RAB6B  | 51560  | NM_016577 | 1 | Weak   |           | YES                      | D-008548-01<br>D-008548-02<br>D-008548-03<br>D-008548-04 | AGACGGA<br>GGAAGAC<br>CCAAGAA<br>GGAUCC   | Medium    |               |     |
| RAB9P1 | 9366   | NR_000039 | 1 | Weak+  |           | YES<br>YES               | D-032266-01<br>D-032266-02<br>D-032266-03<br>D-032266-04 | GCAGCGA<br>GUUCUUA<br>UGAAAGA<br>UGGUCUG  | Medium    |               |     |
| RAD17  | 5884   | NM_002873 | 1 | Weak   |           | YES<br>YES<br>YES        | D-003294-05<br>D-003294-06<br>D-003294-07<br>D-003294-08 | GAAUCA<br>CAACAA<br>ACACAUG<br>CUACAUA    | Weak+     |               |     |
| RBMS1  | 5937   | NM_002897 | 1 | Medium |           |                          | D-011377-01<br>D-011377-02<br>D-011377-03<br>D-011377-04 | CCAUAUA<br>GAAUGAC<br>GAUGCAA<br>ACAAGGA  | Medium    |               |     |
| RFWD3  | 55159  | NM_018124 | 1 | Weak   |           | YES                      | D-017095-01<br>D-017095-02<br>D-017095-03<br>D-017095-04 | GGACCUA<br>GGAAACA<br>GUUAAGA<br>GCAGUCA  | Cytotoxic | Did not score | YES |
| RFXAP  | 5994   | NM_000538 | 1 | Weak   | untreated | YES<br>YES               | D-011104-01<br>D-011104-02<br>D-011104-03<br>D-011104-04 | GGACGAG<br>AGCAACA<br>AAAAGAC<br>CGAGGAA  | Weak+     |               |     |
| RNF125 | 54941  | NM_017831 | 1 | Medium |           | YES                      | D-007005-01<br>D-007005-02<br>D-007005-03<br>D-007005-04 | GGGCAUA<br>GAAAUGA<br>UUAGACC<br>UAUAAGA  | Weak+     |               |     |

|           |        |             |   |        |           |                          |                                                          |                                           |           |               |     |
|-----------|--------|-------------|---|--------|-----------|--------------------------|----------------------------------------------------------|-------------------------------------------|-----------|---------------|-----|
| ROCK1     | 6093   | NM_005406   | 1 | Weak+  |           | YES<br>YES               | D-003536-01<br>D-003536-02<br>D-003536-03<br>D-003536-05 | GGACACA<br>GAAGAAA<br>GAGAUGA<br>GCCAAUG  | Weak      |               | YES |
| ROCK2     | 9475   | NM_004850   | 1 | Weak   |           | YES                      | D-004610-01<br>D-004610-02<br>D-004610-03<br>D-004610-05 | GAGGAAA<br>GUAGAAA<br>GCAACUG<br>GCAAAUC  | Weak+     |               | YES |
| ROD1      | 9991   | NM_005156   | 1 | Weak+  |           | YES<br>YES               | D-019452-01<br>D-019452-02<br>D-019452-03<br>D-019452-04 | GAUCAUA<br>CCGUUAC<br>GAUGGCG<br>UCUUUAU  | Weak+     |               |     |
| ROR2      | 4920   | NM_004560   | 1 | Weak   |           | YES                      | D-003172-05<br>D-003172-06<br>D-003172-07<br>D-003172-08 | GGAACUC<br>GCAGGUG<br>GCAAUGU<br>GAAGACA  | Weak      |               | YES |
| RP42      | 54165  | NM_020640   | 1 | Medium |           | YES<br>YES               | D-019139-01<br>D-019139-02<br>D-019139-03<br>D-019139-04 | CAGAUGA<br>GCAUUAG<br>GCAGUAA<br>GAACCAG  | Medium    |               |     |
| RPS27L    | 51065  | NM_015920   | 1 | Medium |           | YES                      | D-013231-01<br>D-013231-02<br>D-013231-03<br>D-013231-04 | ACAGAAG<br>GUACAAA<br>GCUAGAG<br>UACAAGAU | Medium    |               |     |
| SAA4      | 6291   | NM_006512   | 1 | Weak+  |           |                          | D-012747-01<br>D-012747-02<br>D-012747-03<br>D-012747-04 | CGAGAAA<br>UCAACAC<br>GGGUCUA<br>GGACAUA  | Weak+     |               |     |
| SBK1      | 388228 | NM_00102440 | 1 | Medium |           | YES<br>YES<br>YES        | D-027174-01<br>D-027174-02<br>D-027174-03<br>D-027174-04 | AAACCAA<br>GCGUAAA<br>AAUUGGC<br>CCACGGC  | Strong    |               |     |
| SENP2     | 59343  | NM_021627   | 1 | Medium |           | YES<br>YES               | D-006033-01<br>D-006033-02<br>D-006033-03<br>D-006033-04 | GGACAAA<br>GGUAAUA<br>GAGGAGA<br>UCAGAAG  | Strong    |               |     |
| SEPT11    | 55752  | NM_018243   | 1 | Medium | untreated | YES<br>YES               | D-020249-01<br>D-020249-02<br>D-020249-03<br>D-020249-04 | GAAAGCA<br>CGGCUGA<br>UGACAGC<br>UACCGAC  | Medium    |               |     |
| SERPINA12 | 145264 | NM_173850   | 1 | Weak   |           |                          | D-008739-01<br>D-008739-02<br>D-008739-03<br>D-008739-04 | CUACAUAC<br>UCAAGAA<br>GCAGAUC<br>CAAGUUG | Strong    |               |     |
| SF1       | 7536   | NM_004630   | 1 | Weak   |           | YES                      | D-012662-01<br>D-012662-02<br>D-012662-03<br>D-012662-04 | GAACCAA<br>CAAGUAA<br>UGGACUU<br>ACGCCAC  | Medium    |               |     |
| SF3B5     | 83443  | NM_031287   | 1 | Weak   |           | YES<br>YES<br>YES<br>YES | D-014706-01<br>D-014706-02<br>D-014706-03<br>D-014706-04 | GCUCCUA<br>UCAACUA<br>CCAAGUA<br>GAAUGAG  | Cytotoxic | Did not score | YES |

|          |        |           |   |                  |           |                   |                                                          |                                            |                  |       |     |
|----------|--------|-----------|---|------------------|-----------|-------------------|----------------------------------------------------------|--------------------------------------------|------------------|-------|-----|
| SH3GLB2  | 56904  | NM_020145 | 1 | Weak+            |           | YES               | D-015810-01<br>D-015810-02<br>D-015810-03<br>D-015810-04 | GACUAGA<br>GCAAAGC<br>CCACGAC<br>GAAGUGA   | Medium           |       |     |
| SLC25A12 | 8604   | NM_003705 | 1 | Weak             |           | YES               | D-007471-01<br>D-007471-02<br>D-007471-03<br>D-007471-04 | UAACUGG<br>GCAAGUA<br>CAUAGUG<br>GGUCUGA   | Medium           |       |     |
| SLC2A1   | 6513   | NM_006516 | 1 | Medium<br>Medium | untreated | YES               | D-007509-02<br>D-007509-03<br>D-007509-04<br>D-007509-05 | CCAAGAG<br>CAUCGUG<br>GAGCAUC<br>GUAUGUG   | Medium           |       | YES |
| SLC39A2  | 29986  | NM_014579 | 1 | Weak             |           |                   | D-007570-01<br>D-007570-02<br>D-007570-03<br>D-007570-04 | GAGCAGG<br>GCAGUGU<br>GGUGUUU<br>GCUGGUA   | Cytotoxic Bypass | Weak+ |     |
| SLC39A9  | 55334  | NM_018375 | 1 | Weak+            |           | YES<br>YES        | D-007574-01<br>D-007574-04<br>D-007574-05<br>D-007574-06 | GCAGCAA<br>GAGCGGA<br>CAUCGUG<br>GCAAGUG   | Weak             |       |     |
| SLC6A19  | 340024 | XM_291120 | 1 | Weak             |           | YES               | D-007352-01<br>D-007352-02<br>D-007352-03<br>D-007352-04 | GAGAAGG<br>UCUGUGC<br>GAACAUG<br>GAUCAUG   | Weak+            |       |     |
| SMA4     | 11039  | NM_021652 | 1 | Medium           |           | YES<br>YES        | D-027285-01<br>D-027285-02<br>D-027285-03<br>D-027285-04 | CAAACAG<br>AAACCAG<br>GUGAACG<br>GGAUAGG   | Weak+            |       |     |
| SMARCD1  | 56916  | NM_020159 | 1 | Medium           |           | YES<br>YES        | D-013801-01<br>D-013801-02<br>D-013801-03<br>D-013801-04 | CCACACAU<br>GGCCAAU<br>GCACGUA<br>CAGCAAAL | Weak+            |       | YES |
| SMARCD2  | 6603   | NM_003077 | 1 | Medium           |           | YES               | D-011393-01<br>D-011393-02<br>D-011393-03<br>D-011393-04 | GAAGAUG<br>GGAAGGC<br>GGGAGUA<br>CCAUGAA   | Weak+            |       |     |
| SMARCD3  | 6604   | NM_003078 | 1 | Medium           |           | YES<br>YES        | D-009459-01<br>D-009459-02<br>D-009459-03<br>D-009459-05 | UCAGUGC<br>UAAACCA<br>UGACAAG<br>GAAGAAG   | Weak             |       |     |
| SMBP     | 56889  | NM_020123 | 1 | Weak             |           |                   | D-010220-01<br>D-010220-02<br>D-010220-03<br>D-010220-04 | GAAGUUG<br>CAACUGC<br>GUACAUAC<br>GAAAUCC  | Medium           |       |     |
| SMC5L1   | 23137  | NM_015110 | 1 | Medium           |           | YES<br>YES        | D-014117-01<br>D-014117-02<br>D-014117-03<br>D-014117-04 | GUACUCA<br>AGAGAAA<br>CGACAGA<br>GAGCUAG   | Medium           |       |     |
| SMCR8    | 140775 | NM_144775 | 1 | Weak             | untreated | YES<br>YES<br>YES | D-017373-01<br>D-017373-02<br>D-017373-03<br>D-017373-04 | GGAGAGC<br>CAAGAAA<br>CGAGGGA<br>CUAAGCC   | Medium           |       |     |



|        |        |           |   |                        |           |                   |                                                          |                                          |                  |               |     |
|--------|--------|-----------|---|------------------------|-----------|-------------------|----------------------------------------------------------|------------------------------------------|------------------|---------------|-----|
| SNAPC3 | 6619   | NM_003084 | 1 | Weak                   |           |                   | D-012601-01<br>D-012601-02<br>D-012601-03<br>D-012601-04 | AUACUGA<br>GGUCAGA<br>GGGAUUC<br>GGUGUGC | Weak+            |               | YES |
| SNRPD1 | 6632   | NM_006938 | 1 | Weak<br>Weak<br>Medium | untreated | YES               | D-012353-01<br>D-012353-02<br>D-012353-03<br>D-012353-04 | GGAAUA<br>GCUGAGU<br>GAACACA<br>GCAUGAA  | Cytotoxic        | Did not score |     |
| SP1    | 6667   | NM_138473 | 1 | Weak                   | untreated | YES<br>YES        | D-026959-01<br>D-026959-02<br>D-026959-03<br>D-026959-04 | GCCAAUA<br>GAAGGGA<br>GGGCAGA<br>GGAGUGA | Cytotoxic        | Did not score |     |
| SPATA1 | 64173  | NM_022354 | 1 | Weak                   |           | YES               | D-014045-01<br>D-014045-02<br>D-014045-03<br>D-014045-04 | UGAAAGA<br>UAAUGAG<br>GACCAAU<br>GAGCGGC | Weak+            |               |     |
| SPRY2  | 10253  | NM_005842 | 1 | Weak                   |           | YES               | D-005206-02<br>D-005206-04<br>D-005206-05<br>D-005206-06 | GCAGGUA<br>GAUCAGA<br>GCCUGUU<br>CCCAGAA | Weak+            |               |     |
| SQLE   | 6713   | NM_003129 | 1 | Weak+                  |           | YES<br>YES        | D-009646-01<br>D-009646-02<br>D-009646-03<br>D-009646-04 | GAAACGA<br>CAAAGCG<br>GAAGAAU<br>UAUUGAA | Medium           |               |     |
| SQRDL  | 58472  | NM_021199 | 1 | Weak+                  |           | YES               | D-008271-01<br>D-008271-02<br>D-008271-03<br>D-008271-04 | GAGCGGA<br>GGAAAGC<br>GAAGAUC<br>UAAACAA | Medium           |               |     |
| SREB3  | 54328  | NM_018969 | 1 | Weak                   |           | YES               | D-005727-01<br>D-005727-02<br>D-005727-04<br>D-005727-05 | GCACUCA<br>GUACUGC<br>GCAAGCU<br>CCGCAUC | Medium           |               |     |
| ST7L   | 54879  | NM_017744 | 1 | Weak                   |           | YES<br>YES<br>YES | D-017234-01<br>D-017234-02<br>D-017234-03<br>D-017234-04 | CCAAUGU<br>GAAUAUA<br>GCACUGG<br>GAAUCAA | Strong           |               |     |
| SWAP70 | 23075  | NM_015055 | 1 | Weak                   |           | YES<br>YES        | D-010323-01<br>D-010323-02<br>D-010323-03<br>D-010323-04 | GGACAAG<br>CAAGAGG<br>GAGAGAA<br>GAGAUUG | Cytotoxic Bypass | Medium        |     |
| TAB3   | 257397 | NM_152787 | 1 | Weak                   |           |                   | D-015572-01<br>D-015572-02<br>D-015572-03<br>D-015572-04 | GUACUA<br>GAAAGAA<br>CAAAGCA<br>GAAUAGA  | Medium           |               |     |
| TAF9L  | 51616  | NM_015975 | 1 | Weak                   |           | YES<br>YES<br>YES | D-017217-01<br>D-017217-02<br>D-017217-03<br>D-017217-04 | GAGACUA<br>AGGCUGA<br>GAACACA<br>GAAUUUG | Strong           |               |     |
| TBPL1  | 9519   | NM_004865 | 1 | Medium                 |           | YES<br>YES<br>YES | D-017254-01<br>D-017254-02<br>D-017254-03<br>D-017254-04 | GGAAGGA<br>UAACAGG<br>UCUAAGA<br>UGUGUAA | Weak+            |               |     |

|          |        |           |   |        |                        |                   |                                                          |                                           |                  |               |     |
|----------|--------|-----------|---|--------|------------------------|-------------------|----------------------------------------------------------|-------------------------------------------|------------------|---------------|-----|
| TCERG1L  | 256536 | NM_174937 | 1 | Weak   |                        |                   | D-017916-01<br>D-017916-02<br>D-017916-03<br>D-017916-04 | GAACGAA<br>GUAAAAU<br>CAUAAAC<br>GGACCAC  | Strong           |               |     |
| TFF1     | 7031   | NM_003225 | 1 | Weak   |                        | YES<br>YES        | D-003715-01<br>D-003715-02<br>D-003715-03<br>D-003715-04 | AGAAGAG<br>GAAAGAC<br>CAGAAGA<br>AAAGACA  | Medium           |               |     |
| TNFRSF19 | 55504  | NM_018647 | 1 | Weak   |                        | YES               | D-008098-01<br>D-008098-02<br>D-008098-03<br>D-008098-04 | GACCUC<br>UCAAAUA<br>UACAGCA<br>GCAUGGA   | Medium           |               |     |
| TOP3A    | 7156   | NM_004618 | 1 | Weak   |                        | YES<br>YES        | D-005279-01<br>D-005279-02<br>D-005279-03<br>D-005279-04 | GAAACUA<br>CCACAAA<br>CCAGAAA<br>GAACAAG  | Weak+            |               |     |
| TPX2     | 22974  | NM_012112 | 1 | Medium | untreated<br>untreated | YES               | D-010571-01<br>D-010571-02<br>D-010571-03<br>D-010571-04 | UGACAAC<br>GGACGAA<br>AGACAAA<br>GAACUUU  | Cytotoxic        | Did not score | YES |
| TRAG3    | 9598   | NM_004909 | 1 | Medium |                        | YES<br>YES        | D-005212-01<br>D-005212-02<br>D-005212-03<br>D-005212-04 | CCAAUUA<br>GGAAUUC<br>UACCACA<br>GAAUUCU  | Medium           |               |     |
| TRAM1    | 23471  | NM_014294 | 1 | Medium | untreated              |                   | D-018676-01<br>D-018676-02<br>D-018676-03<br>D-018676-04 | GAUAAUU<br>UAAUGAA<br>GAGCUAA<br>CAGUGUC  | Medium           |               |     |
| TRAP1    | 10131  | NM_016292 | 1 | Medium |                        |                   | D-010104-01<br>D-010104-02<br>D-010104-03<br>D-010104-04 | GCUACAC<br>UGAGAAG<br>UGAAUGA<br>CAUGAUU  | Medium           |               |     |
| TRAPPC6B | 122553 | NM_177452 | 1 | Medium |                        |                   | D-018297-01<br>D-018297-02<br>D-018297-03<br>D-018297-04 | GGACAAG<br>GUUUUUA<br>AACGGAC<br>GCUUGCA  | Medium           |               |     |
| TRIM50B  | 375593 | NM_198924 | 1 | Weak   |                        | YES<br>YES<br>YES | D-028896-01<br>D-028896-02<br>D-028896-03<br>D-028896-04 | GGACCCG<br>CAAGGAG<br>UCGCAGC<br>AGUGUGU  | Weak+            |               |     |
| TRIM9    | 114088 | NM_015163 | 1 | Weak   |                        | YES<br>YES        | D-012974-01<br>D-012974-02<br>D-012974-03<br>D-012974-04 | CCACAGG<br>GCUUGGA<br>CAACGGC<br>AAACAGG  | Cytotoxic        | Did not score |     |
| TRIP12   | 9320   | NM_004238 | 1 | Weak   |                        | YES<br>YES        | D-007182-01<br>D-007182-02<br>D-007182-03<br>D-007182-04 | GAACUGA<br>CCAAAGA<br>GAUACCA<br>CAAUAAC  | Weak             |               | YES |
| TSPAN18  | 90139  | NM_130783 | 1 | Weak+  |                        | YES<br>YES        | D-015297-01<br>D-015297-02<br>D-015297-03<br>D-015297-04 | CAACGGG<br>GAACAAG<br>GCAGGGC<br>GCAAUAAC | Cytotoxic Bypass | Medium        |     |

|          |        |           |   |                |           |                   |                                                          |                                          |        |  |  |
|----------|--------|-----------|---|----------------|-----------|-------------------|----------------------------------------------------------|------------------------------------------|--------|--|--|
| TSPAN9   | 10867  | NM_006675 | 1 | Medium<br>Weak |           | YES<br>YES        | D-012293-01<br>D-012293-02<br>D-012293-03<br>D-012293-04 | GAGAUGC<br>UAAGAAG<br>GCAGAGC<br>AAGAACG | Medium |  |  |
| TXNDC    | 81542  | NM_030755 | 1 | Weak           |           | YES<br>YES        | D-010675-01<br>D-010675-02<br>D-010675-03<br>D-010675-04 | UAAAUGC<br>GAAGGAG<br>GGGAGAA<br>GGACUGA | Weak   |  |  |
| U2AF1L1  | 7310   | NM_005083 | 1 | Weak           |           | YES               | D-006595-01<br>D-006595-02<br>D-006595-03<br>D-006595-04 | GGAGACA<br>GACGACA<br>GAGCAUG<br>GGCGAUU | Weak+  |  |  |
| UBE2J2   | 118424 | NM_058167 | 1 | Weak+          |           | YES               | D-008614-01<br>D-008614-02<br>D-008614-03<br>D-008614-04 | GAAGGUG<br>GCACAAG<br>GGACUAC<br>GUUAUAG | Medium |  |  |
| UBQLN3   | 50613  | NM_017481 | 1 | Weak           |           |                   | D-013398-01<br>D-013398-02<br>D-013398-03<br>D-013398-04 | UUUAUAG<br>CUUAACA<br>GCUGCAA<br>ACAGUUA | Weak+  |  |  |
| UPP2     | 151531 | NM_173355 | 1 | Weak+          |           | YES               | D-006646-01<br>D-006646-02<br>D-006646-03<br>D-006646-04 | GUACUGA<br>GAAGAGA<br>GAUCUGA<br>CAACCUA | Weak+  |  |  |
| UROD     | 7389   | NM_000374 | 1 | Weak           |           | YES               | D-013415-01<br>D-013415-02<br>D-013415-03<br>D-013415-04 | CAUGGAC<br>GGAGAC<br>CCAGGCA<br>GAUCAUC  | Medium |  |  |
| USP11    | 8237   | NM_004651 | 1 | Weak+          |           | YES               | D-006063-01<br>D-006063-02<br>D-006063-03<br>D-006063-04 | GGGCAAA<br>GAACAAG<br>GAUGAUA<br>GAGAAGC | Medium |  |  |
| VCL      | 7414   | NM_003373 | 1 | Weak           |           | YES<br>YES        | D-009288-01<br>D-009288-02<br>D-009288-03<br>D-009288-04 | GGAAUAU<br>GGGAAGA<br>GCUCGUA<br>GAGCGAA | Medium |  |  |
| VKORC1L1 | 154807 | NM_173517 | 1 | Medium         |           | YES<br>YES        | D-018539-01<br>D-018539-02<br>D-018539-03<br>D-018539-04 | UGGAAAG<br>CAGUGUC<br>GUUAUUA<br>CAGAUGG | Medium |  |  |
| WASF1    | 8936   | NM_003931 | 1 | Medium         |           | YES<br>YES        | D-011557-01<br>D-011557-02<br>D-011557-03<br>D-011557-04 | AAACAAG<br>UUACACA<br>CUAAGUA<br>GCUACAG | Medium |  |  |
| WISP1    | 8840   | NM_003882 | 1 | Medium         | untreated | YES<br>YES<br>YES | D-010555-01<br>D-010555-02<br>D-010555-03<br>D-010555-04 | GGACAUC<br>GCUCCUA<br>AGAAGUG<br>UGACAUC | Medium |  |  |
| WNT3A    | 89780  | NM_033131 | 1 | Strong         |           | YES<br>YES<br>YES | D-008538-01<br>D-008538-02<br>D-008538-03<br>D-008538-04 | GCGAGGA<br>GAAGUGC<br>GCAGUGA<br>GGAACUA | Medium |  |  |

|         |        |           |   |        |           |                   |                                                          |                                           |        |  |     |
|---------|--------|-----------|---|--------|-----------|-------------------|----------------------------------------------------------|-------------------------------------------|--------|--|-----|
| YIPF1   | 54432  | NM_018982 | 1 | Weak   |           | YES               | D-016906-01<br>D-016906-02<br>D-016906-03<br>D-016906-04 | GAGAGAA<br>GCAAAGU<br>UAACCGA<br>CCGCAAU  | Medium |  |     |
| ZFP36L1 | 677    | NM_004926 | 1 | Weak   |           |                   | D-011816-01<br>D-011816-02<br>D-011816-03<br>D-011816-04 | GUAAACA<br>CAGCAGA<br>AAACAAG<br>UAACAAG  | Medium |  |     |
| ZNF11B  | 7558   | NM_006955 | 1 | Medium |           |                   | D-012772-01<br>D-012772-02<br>D-012772-03<br>D-012772-04 | GGAAACA<br>GAGAAUA<br>GGACAGU<br>UGUAUGA  | Weak+  |  |     |
| ZNF215  | 7762   | NM_013250 | 1 | Weak   |           | YES               | D-020661-01<br>D-020661-02<br>D-020661-03<br>D-020661-04 | GACCAGA<br>GGACUUG<br>UCAGUUA<br>GAAAGGU  | Medium |  |     |
| ZNF223  | 7766   | NM_013361 | 1 | Medium |           |                   | D-006592-01<br>D-006592-02<br>D-006592-03<br>D-006592-04 | GGGAAGA<br>AGACAGG<br>GGAAAAG<br>CCUCAAG  | Medium |  |     |
| ZNF26   | 7574   | NM_019591 | 1 | Weak   |           |                   | D-021443-01<br>D-021443-02<br>D-021443-03<br>D-021443-04 | UCAAAGA<br>GUUCACA<br>GAAUUCA<br>GAAGUCU  | Medium |  |     |
| ZNF514  | 84874  | NM_032788 | 1 | Weak   |           | YES<br>YES        | D-014996-01<br>D-014996-02<br>D-014996-03<br>D-014996-04 | GGUCAUA<br>UAAGAUC<br>UGUCAAC<br>CGGUUGU  | Medium |  |     |
| ZNF585A | 199704 | NM_152655 | 1 | Weak   |           | YES<br>YES<br>YES | D-016432-01<br>D-016432-02<br>D-016432-03<br>D-016432-04 | AAGCAGA<br>CGACAGA<br>CCAGAAG<br>CCUCAGU  | Weak+  |  |     |
| ZNF619  | 285267 | NM_173656 | 1 | Weak   |           |                   | D-018125-01<br>D-018125-02<br>D-018125-03<br>D-018125-04 | CAACCCAC<br>GGAAGAA<br>UCAGAUG<br>GCCCGAA | Medium |  |     |
| ACTR10  | 55860  | NM_018477 | 0 |        | untreated |                   | D-020824-01<br>D-020824-02<br>D-020824-03<br>D-020824-04 | GGUCCAA<br>GCGCGUA<br>GCACUAA<br>UAUCGAA  | Weak+  |  |     |
| AF5Q31  | 27125  | NM_014423 | 0 |        |           | YES               | D-020276-01<br>D-020276-02<br>D-020276-03<br>D-020276-04 | GGGAAUA<br>GCAGAGC<br>CAACGAA<br>GGAAUGU  | Weak   |  | YES |
| AGPAT3  | 56894  | NM_020132 | 0 |        |           | YES<br>YES        | D-008620-01<br>D-008620-02<br>D-008620-03<br>D-008620-04 | GCUCCAA<br>GGGAGCA<br>UCCAGGA<br>GCAGCUG  | Medium |  |     |
| ALDH2   | 217    | NM_000690 | 0 |        | untreated | YES<br>YES        | D-009766-01<br>D-009766-02<br>D-009766-03<br>D-009766-04 | UCAAAUG<br>GAAGGUA<br>CCGCAGC<br>GAAUUUC  | Medium |  |     |

|           |        |           |   |                                  |                                     |                   |                                                          |                                          |                  |        |     |
|-----------|--------|-----------|---|----------------------------------|-------------------------------------|-------------------|----------------------------------------------------------|------------------------------------------|------------------|--------|-----|
| ALPL      | 249    | NM_000478 | 0 |                                  |                                     | YES               | D-008658-01<br>D-008658-02<br>D-008658-03<br>D-008658-04 | CUAAGAA<br>CCUACCA<br>GGACUUA<br>CAAGAGA | Medium           |        |     |
| AMELY     | 266    | NM_001143 | 0 |                                  |                                     |                   | D-011205-01<br>D-011205-02<br>D-011205-03<br>D-011205-04 | GAUAAGA<br>GCACUGA<br>CAUACUU<br>CAGCAAU | Weak+            |        |     |
| ANAPC5    | 51433  | NM_016237 | 0 | Strong<br>Weak<br>Medium<br>Weak | untreated<br>untreated<br>untreated |                   | D-016095-01<br>D-016095-02<br>D-016095-03<br>D-016095-04 | GAACAGG<br>UAGGAAA<br>UGUCAGA<br>GAAGGCG | Cytotoxic Bypass | Medium |     |
| APOBEC2   | 10930  | NM_006789 | 0 |                                  |                                     | YES<br>YES        | D-019944-01<br>D-019944-02<br>D-019944-03<br>D-019944-04 | GAACCUG<br>GUAACU<br>CCUGCCA<br>AAGAAGA  | Weak+            |        |     |
| AZU1      | 566    | NM_001700 | 0 |                                  |                                     | YES               | D-008914-01<br>D-008914-02<br>D-008914-03<br>D-008914-04 | GCAUGAG<br>GAGACUG<br>GCGGCCA<br>GGAUCGA | Weak+            |        |     |
| BASE      | 317716 | NM_173859 | 0 |                                  |                                     | YES               | D-010740-01<br>D-010740-02<br>D-010740-03<br>D-010740-04 | GAAUGUA<br>CCAAUGA<br>GAAUGUC<br>GAAAGGA | Weak+            |        |     |
| BCL10     | 8915   | NM_003921 | 0 | Weak+                            | untreated                           | YES<br>YES<br>YES | D-004381-02<br>D-004381-03<br>D-004381-04<br>D-004381-05 | GCCACCA<br>GAAGAUU<br>GAAUUUU<br>GGGCAUC | Medium           |        |     |
| BIRC1     | 4671   | NM_004536 | 0 |                                  |                                     |                   | D-004389-01<br>D-004389-02<br>D-004389-04<br>D-004389-05 | GUAAGA<br>GAAUUUA<br>CAAGGGA<br>GUACAAG  | Weak+            |        |     |
| C10ORF1   | 11241  | NM_206995 | 0 |                                  |                                     | YES               | D-019504-01<br>D-019504-02<br>D-019504-03<br>D-019504-04 | CUACAAA<br>GCUCUAG<br>UGACAGC<br>GCAGUAC | Medium           |        |     |
| C10ORF57  | 80195  | NM_025125 | 0 |                                  |                                     |                   | D-018946-01<br>D-018946-02<br>D-018946-03<br>D-018946-04 | GAGGCAG<br>GAGUAUC<br>GAUAGCG<br>GUGCAAG | Weak+            |        |     |
| C10ORF86  | 54780  | NM_017615 | 0 |                                  |                                     | YES<br>YES<br>YES | D-020566-01<br>D-020566-02<br>D-020566-03<br>D-020566-04 | GGAAUUA<br>ACACAGA<br>GUAAUAG<br>AAUGAAG | Weak             |        | YES |
| C14ORF101 | 54916  | NM_017799 | 0 |                                  |                                     | YES               | D-020793-01<br>D-020793-02<br>D-020793-03<br>D-020793-04 | GAAUAG<br>GGACCGA<br>GCAACAA<br>UGGCUAA  | Weak             |        |     |
| C2ORF4    | 51072  | NM_015955 | 0 |                                  |                                     |                   | D-016087-01<br>D-016087-02<br>D-016087-03<br>D-016087-04 | GGUCAAA<br>AAGGAUG<br>GCAAGAC<br>UCUAUUA | Medium           |        |     |

|          |        |           |   |                                    |                                                  |            |                                                          |                                          |           |               |     |
|----------|--------|-----------|---|------------------------------------|--------------------------------------------------|------------|----------------------------------------------------------|------------------------------------------|-----------|---------------|-----|
| C6ORF175 | 404672 | NM_207118 | 0 |                                    |                                                  | YES        | D-032021-01<br>D-032021-02<br>D-032021-03<br>D-032021-04 | GGGAAGA<br>GGAGCGA<br>UAGCAGA<br>UGAUGAC | Weak      |               | YES |
| C6ORF214 | 401247 | NM_207496 | 0 |                                    |                                                  |            | D-032203-01<br>D-032203-02<br>D-032203-03<br>D-032203-04 | CCGAACA<br>CUUCACA<br>UCAAGA<br>CUUCAGA  | Weak+     |               |     |
| C6ORF70  | 55780  | XM_376556 | 0 |                                    |                                                  | YES        | D-028653-01<br>D-028653-02<br>D-028653-03<br>D-028653-04 | UAAAGUC<br>CAACCUG<br>GAAAUCC<br>GCCGUAG | Medium    |               |     |
| CALR3    | 125972 | NM_145046 | 0 |                                    |                                                  |            | D-016230-01<br>D-016230-02<br>D-016230-03<br>D-016230-04 | UUAACAG<br>ACCAAUG<br>CGACUGG<br>CCGACUA | Weak+     |               |     |
| CASP8AP2 | 9994   | NM_012115 | 0 |                                    |                                                  | YES        | D-012413-01<br>D-012413-02<br>D-012413-03<br>D-012413-04 | GAACAGA<br>UGGCAUA<br>GAGAGUA<br>GCACAUG | Cytotoxic | Did not score | YES |
| CDC16    | 8881   | NM_003903 | 0 | Strong<br>Medium<br>Medium<br>Weak | untreated<br>untreated<br>untreated<br>untreated |            | D-003223-05<br>D-003223-07<br>D-003223-08<br>D-003223-09 | GUAGAUG<br>GCUACAA<br>UGGAAGA<br>CUAUGGA | Medium    |               |     |
| CDC26    | 246184 | NM_139286 | 0 | Weak                               | untreated<br>untreated<br>untreated<br>untreated | YES        | D-017290-01<br>D-017290-02<br>D-017290-03<br>D-017290-04 | CAACACG<br>CCAUUGG<br>CAAUAUC<br>CCUGGAG | Weak+     |               | YES |
| CDH22    | 64405  | NM_021248 | 0 |                                    |                                                  |            | D-013099-01<br>D-013099-02<br>D-013099-03<br>D-013099-04 | GCACGUC<br>GACCAGA<br>ACACAGA<br>CAUCAAA | Medium    |               |     |
| CHCHD6   | 84303  | NM_032343 | 0 |                                    |                                                  | YES        | D-014866-01<br>D-014866-02<br>D-014866-03<br>D-014866-04 | GCUGAGA<br>UCCACAA<br>AAAGAUG<br>AGGAUAA | Medium    |               |     |
| CKIP-1   | 51177  | NM_016274 | 0 |                                    |                                                  | YES<br>YES | D-016800-01<br>D-016800-02<br>D-016800-03<br>D-016800-04 | GGAGAGG<br>UGAGAGA<br>GAUCAAU<br>GGGUUGA | Weak+     |               |     |
| CKS1B    | 1163   | NM_001826 | 0 |                                    |                                                  |            | D-004586-01<br>D-004586-03<br>D-004586-04<br>D-004586-05 | CGACGAG<br>ACCAGAA<br>UCUGAUG<br>CAAUUUU | Medium    |               |     |
| CLDN10   | 9071   | NM_006984 | 0 |                                    |                                                  | YES        | D-019255-01<br>D-019255-02<br>D-019255-03<br>D-019255-04 | GCAUGUA<br>GAUGUUC<br>CCGAUAA<br>GUGCAUA | Medium    |               |     |
| CLIC1    | 1192   | NM_001288 | 0 |                                    |                                                  | YES<br>YES | D-009530-01<br>D-009530-02<br>D-009530-03<br>D-009530-04 | GGAGUCA<br>GGACCGA<br>AGAUCGA<br>GAACAAC | Medium    |               |     |

|              |        |           |   |       |  |                                     |                          |                                                          |                                          |                  |               |     |
|--------------|--------|-----------|---|-------|--|-------------------------------------|--------------------------|----------------------------------------------------------|------------------------------------------|------------------|---------------|-----|
| CLTB         | 1212   | NM_001834 | 0 |       |  | untreated                           | YES<br>YES               | D-004003-01<br>D-004003-02<br>D-004003-03<br>D-004003-04 | GCGCCAG<br>GAAGGUG<br>GGAACCA<br>GAGCGAG | Weak+            |               |     |
| CNN1         | 1264   | NM_001299 | 0 |       |  |                                     |                          | D-015851-01<br>D-015851-02<br>D-015851-03<br>D-015851-04 | GCACACA<br>CAGCCGA<br>GGAGUGA<br>GAGAACA | Cytotoxic Bypass | Medium        |     |
| COPZ1        | 22818  | NM_016057 | 0 |       |  |                                     | YES<br>YES<br>YES<br>YES | D-020293-01<br>D-020293-02<br>D-020293-03<br>D-020293-04 | CCAAAGA<br>GGCUGUG<br>GAACCUU<br>CAACAAG | Cytotoxic        | Did not score | YES |
| COX7A3       | 1348   | NM_183003 | 0 |       |  | untreated                           | YES                      | D-019464-01<br>D-019464-02<br>D-019464-03<br>D-019464-04 | GCAAUCA<br>AUAAGGA<br>GAUAGCU<br>AUAAGAU | Medium           |               |     |
| CPVL         | 54504  | NM_019029 | 0 |       |  |                                     | YES<br>YES               | D-005828-01<br>D-005828-02<br>D-005828-03<br>D-005828-04 | GGACAGC<br>GAACGGA<br>GCAGUGC<br>GACUGAA | Medium           |               |     |
| CSPG6        | 9126   | NM_005445 | 0 |       |  | untreated<br>untreated<br>untreated | YES                      | D-006834-01<br>D-006834-02<br>D-006834-03<br>D-006834-04 | GAAGCAI<br>GAACGGA<br>GGAAUUA<br>GAAGAGA | Cytotoxic        | Did not score | YES |
| CSTF2T       | 23283  | NM_015235 | 0 |       |  |                                     | YES<br>YES               | D-021449-01<br>D-021449-02<br>D-021449-03<br>D-021449-04 | GAAGAUA<br>GAAGCCA<br>GAUCCCA<br>GGAGACU | Cytotoxic        | Did not score | YES |
| CSTF3        | 1479   | NM_001326 | 0 |       |  |                                     |                          | D-011247-01<br>D-011247-02<br>D-011247-03<br>D-011247-04 | GGACAAA<br>GUAGAUU<br>UAUGAAU<br>GAUUGAA | Medium           |               |     |
| CTAG1A       | 246100 | NM_139250 | 0 |       |  |                                     | YES<br>YES               | D-016967-01<br>D-016967-02<br>D-016967-03<br>D-016967-04 | CUGAAUG<br>CGCCAUG<br>CCGGCAA<br>GCCGCCU | Cytotoxic Bypass | Weak+         |     |
| DKFZP313N062 | 285343 | NM_173826 | 0 | Weak+ |  | untreated                           | YES                      | D-018121-01<br>D-018121-02<br>D-018121-03<br>D-018121-04 | GAACAUU<br>GCAAAA<br>CAGCAUU<br>GAAUUA   | Weak+            |               |     |
| DLAD         | 58511  | NM_021233 | 0 |       |  |                                     |                          | D-008278-01<br>D-008278-02<br>D-008278-03<br>D-008278-04 | GGAAGAA<br>UCACGAC<br>GAGACGA<br>UCCCUAA | Medium           |               |     |
| DPF1         | 8193   | NM_004647 | 0 |       |  |                                     | YES                      | D-031779-01<br>D-031779-02<br>D-031779-03<br>D-031779-04 | CGGGACA<br>AGUACAA<br>CAUUUGG<br>GGCCAAA | Cytotoxic Bypass | Medium        |     |
| DPP6         | 1804   | NM_001936 | 0 |       |  | untreated                           |                          | D-010129-01<br>D-010129-02<br>D-010129-03<br>D-010129-04 | UCAUGGA<br>GCCAAC<br>GCACACA<br>CAACAGA  | Medium           |               |     |

|          |        |           |   |  |           |                   |                                                          |                                           |                  |               |     |
|----------|--------|-----------|---|--|-----------|-------------------|----------------------------------------------------------|-------------------------------------------|------------------|---------------|-----|
| DSG2     | 1829   | NM_001943 | 0 |  | untreated |                   | D-011645-01<br>D-011645-02<br>D-011645-03<br>D-011645-04 | GCUAGAU<br>GCAUAGC<br>CCUUAGA<br>AGAUGUA  | Medium           |               |     |
| EBF      | 1879   | NM_024007 | 0 |  |           | YES               | D-011848-01<br>D-011848-02<br>D-011848-03<br>D-011848-04 | GAAGGUA<br>GGAACAG<br>AAAGACCA<br>CAACGAA | Medium           |               |     |
| EIF1AY   | 9086   | NM_004681 | 0 |  |           | YES               | D-011908-01<br>D-011908-02<br>D-011908-03<br>D-011908-04 | AAAGAGA<br>GAAAUCCA<br>GGAAAU<br>UAUAUUG  | Medium           |               |     |
| EIF2S1   | 1965   | NM_004094 | 0 |  |           | YES<br>YES<br>YES | D-015389-05<br>D-015389-06<br>D-015389-07<br>D-015389-08 | UUGCUGA<br>GUACAAG<br>GGAUGA<br>GAAGGCG   | Cytotoxic        | Did not score |     |
| ELSPBP1  | 64100  | NM_022142 | 0 |  |           |                   | D-013046-01<br>D-013046-02<br>D-013046-03<br>D-013046-04 | UAACUGCA<br>GAAGAUU<br>CCAGUUA<br>GCACCCA | Weak+            |               |     |
| ENAH     | 55740  | NM_018212 | 0 |  |           |                   | D-021932-01<br>D-021932-02<br>D-021932-03<br>D-021932-04 | GCAAGUC<br>GGAUUGC<br>GAGAGAG<br>GGAGCGA  | Cytotoxic Bypass | Did not score | YES |
| EREG     | 2069   | NM_001432 | 0 |  |           | YES<br>YES<br>YES | D-011268-01<br>D-011268-02<br>D-011268-03<br>D-011268-04 | GCUCUGA<br>GUACAAC<br>GAAGUGG<br>GCUUUGA  | Medium           |               |     |
| FADS1    | 3992   | NM_013402 | 0 |  |           | YES               | D-008210-01<br>D-008210-02<br>D-008210-03<br>D-008210-04 | GGAACCA<br>GAGGAGC<br>GACUUGG<br>UCACUUA  | Medium           |               |     |
| FKBP6    | 8468   | NM_003602 | 0 |  |           | YES<br>YES        | D-009426-01<br>D-009426-02<br>D-009426-03<br>D-009426-04 | GAGCAAC<br>GAGAGGA<br>UUACAUAC<br>GAAACUG | Medium           |               |     |
| FLJ14959 | 284391 | XM_371139 | 0 |  |           |                   | D-031230-01<br>D-031230-02<br>D-031230-03<br>D-031230-04 | GCAACUG<br>UGACAAA<br>GCCCUUG<br>ACACUAG  | Weak+            |               |     |
| FLJ22329 | 79709  | NM_024656 | 0 |  |           |                   | D-018152-01<br>D-018152-02<br>D-018152-03<br>D-018152-04 | GAAAUCA<br>AGAAAUC<br>CAACAUG<br>CCGAAAC  | Medium           |               |     |
| FLJ25778 | 254048 | XM_376679 | 0 |  |           | YES<br>YES<br>YES | D-025464-01<br>D-025464-02<br>D-025464-03<br>D-025464-04 | CCAGUUG<br>GAACUAG<br>GAACACA<br>GGCAUU   | Cytotoxic Bypass | Did not score | YES |
| FLJ35424 | 285492 | NM_173661 | 0 |  |           |                   | D-018114-01<br>D-018114-02<br>D-018114-03<br>D-018114-04 | CGACAUAC<br>GCACCUG<br>CUUCGUC<br>GCAAUUA | Medium           |               |     |



|          |        |             |   |  |  |            |                                                          |                                           |                  |               |     |
|----------|--------|-------------|---|--|--|------------|----------------------------------------------------------|-------------------------------------------|------------------|---------------|-----|
| FLJ42220 | 400207 | NM_207441   | 0 |  |  |            | D-032121-01<br>D-032121-02<br>D-032121-03<br>D-032121-04 | UCGCGAA<br>GGGAGUA<br>CGGGAGA<br>GGCAAUU  | Weak+            |               |     |
| FLJ43826 | 342666 | NM_198502   | 0 |  |  |            | D-027247-01<br>D-027247-02<br>D-027247-03<br>D-027247-04 | GAACUUA<br>CAGAAUC<br>UUCAGAC<br>CCUCCUG  | Weak+            |               |     |
| FLJ45121 | 400556 | NM_207451   | 0 |  |  |            | D-032136-01<br>D-032136-02<br>D-032136-03<br>D-032136-04 | CAGCAUA<br>GCACGAU<br>UCACUGA<br>CUGCUGA  | Medium           |               |     |
| FLJ46082 | 389799 | NM_207417   | 0 |  |  | YES        | D-032095-01<br>D-032095-02<br>D-032095-03<br>D-032095-04 | GGAUUUA<br>GGACAUC<br>GGGAACC<br>CCUCAGC  | Weak+            |               |     |
| FMN2     | 56776  | XM_371352   | 0 |  |  |            | D-022134-01<br>D-022134-02<br>D-022134-03<br>D-022134-04 | GAAGGAA<br>UCUCGAA<br>GCAGAAG<br>GGGAGUA  | Medium           |               | YES |
| FOXJ2    | 55810  | NM_018416   | 0 |  |  | YES        | D-009350-01<br>D-009350-02<br>D-009350-03<br>D-009350-04 | GCCUUAU<br>GAACAAC<br>GGACUCA<br>GAUGAUC  | Weak             |               | YES |
| GALNTL4  | 374378 | NM_198516   | 0 |  |  | YES        | D-031763-01<br>D-031763-02<br>D-031763-03<br>D-031763-04 | GGGACAC<br>AAACUUU<br>CAGGAGG<br>UGACAAC  | Medium           |               |     |
| GCLM     | 2730   | NM_002061   | 0 |  |  | YES        | D-011670-01<br>D-011670-02<br>D-011670-03<br>D-011670-04 | GCGAGGA<br>GGAAUGC<br>GGUAUUC<br>CACCAGAU | Medium           |               |     |
| GGA1     | 26088  | NM_00100156 | 0 |  |  | YES        | D-013694-01<br>D-013694-02<br>D-013694-03<br>D-013694-04 | UAUCUGG<br>UCCGGGA<br>CGAAGAG<br>GAAGAGC  | Cytotoxic        | Did not score | YES |
| GNAT3    | 346562 | XM_294370   | 0 |  |  |            | D-028947-01<br>D-028947-02<br>D-028947-03<br>D-028947-04 | CCGUAAA<br>GGACCAA<br>UCAAUGA<br>CGACUGG  | Weak+            |               |     |
| GUCA1A   | 2978   | NM_000409   | 0 |  |  | YES        | D-019288-01<br>D-019288-02<br>D-019288-03<br>D-019288-04 | AACAGAA<br>ACAGUGU<br>AAGGACG<br>CGUGAUG  | Weak+            |               |     |
| HDAC4    | 9759   | NM_006037   | 0 |  |  | YES<br>YES | D-003497-01<br>D-003497-02<br>D-003497-04<br>D-003497-06 | CGACAGG<br>AAAUUAC<br>GAAUGUA<br>GAGUGUC  | Cytotoxic Bypass | Did not score |     |
| HESX1    | 8820   | NM_003865   | 0 |  |  |            | D-019521-01<br>D-019521-02<br>D-019521-03<br>D-019521-04 | GAAAGAC<br>GAUGGUA<br>AGAGUAA<br>CGAUUUU  | Medium           |               |     |

|        |        |           |   |        |           |                   |                                                          |                                           |           |               |     |
|--------|--------|-----------|---|--------|-----------|-------------------|----------------------------------------------------------|-------------------------------------------|-----------|---------------|-----|
| HKR2   | 342945 | NM_181846 | 0 |        |           | YES               | D-007175-01<br>D-007175-02<br>D-007175-03<br>D-007175-04 | GGACAGA<br>GUACGCA<br>GCCUGA<br>AGAGAGG   | Weak+     |               | YES |
| HLXB9  | 3110   | NM_005515 | 0 |        |           | YES               | D-010960-01<br>D-010960-02<br>D-010960-03<br>D-010960-04 | GGACGAC<br>CGGAUGA<br>CUAAGAU<br>CGCAGGA  | Medium    |               |     |
| HMG20A | 10363  | NM_018200 | 0 |        |           | YES               | D-015454-01<br>D-015454-02<br>D-015454-03<br>D-015454-04 | UGAACAG<br>GAGAACA<br>GAAAUCA<br>ACAGAGA  | Weak      |               |     |
| HMG20B | 10362  | NM_006339 | 0 |        |           | YES<br>YES        | D-020146-02<br>D-020146-03<br>D-020146-04<br>D-020146-05 | GAGAGAA<br>GGGCGUA<br>GGACACA<br>CGCGUAU  | Weak      |               |     |
| HMG2   | 3151   | NM_005517 | 0 |        |           | YES               | D-012710-01<br>D-012710-02<br>D-012710-03<br>D-012710-04 | CUAAUAG<br>ACUAAUA<br>UAGAAUG<br>CCAAGCU  | Weak+     |               |     |
| HNRPK  | 3190   | NM_002140 | 0 |        | untreated | YES<br>YES<br>YES | D-011692-01<br>D-011692-02<br>D-011692-03<br>D-011692-04 | GAGCGCA<br>GAUCUUG<br>GGUCAGC<br>GUCGGGA  | Cytotoxic | Did not score |     |
| HOXB6  | 3216   | NM_018952 | 0 | Medium | untreated | YES               | D-017336-01<br>D-017336-02<br>D-017336-03<br>D-017336-04 | CGGACCC<br>CGGAUGA<br>UGACGGA<br>GCCGAGG  | Weak      |               | YES |
| HRLP5  | 117245 | NM_054108 | 0 |        |           |                   | D-010293-01<br>D-010293-02<br>D-010293-03<br>D-010293-04 | CAGCAUU<br>UCAACAA<br>GCAUAAA<br>GCAGUUA  | Medium    |               |     |
| IK     | 3550   | NM_006083 | 0 |        | untreated |                   | D-012190-01<br>D-012190-02<br>D-012190-03<br>D-012190-04 | CCGCAUG<br>CAUAUGA<br>GCAGGGA<br>GAUGGAA  | Cytotoxic | Did not score | YES |
| ILF2   | 3608   | NM_004515 | 0 |        |           |                   | D-017599-01<br>D-017599-02<br>D-017599-03<br>D-017599-04 | GAACAGG<br>GAAACUG<br>CAUGGUG<br>GGACAUG  | Medium    |               | YES |
| IRAK3  | 11213  | NM_007199 | 0 |        |           | YES               | D-004762-01<br>D-004762-02<br>D-004762-03<br>D-004762-04 | CAUCAGA<br>CCACAAAC<br>GAUCAUG<br>CCAAAUC | Medium    |               |     |
| ITGB7  | 3695   | NM_000889 | 0 | Strong | untreated | YES<br>YES<br>YES | D-008013-02<br>D-008013-03<br>D-008013-04<br>D-008013-05 | GACCUGA<br>GAUGAUG<br>GGACAGU<br>ACAGUAA  | Medium    |               |     |
| KBTBD5 | 131377 | NM_152393 | 0 |        |           | YES<br>YES<br>YES | D-016211-01<br>D-016211-02<br>D-016211-03<br>D-016211-04 | GCGCAUA<br>GAACAAG<br>AAUCGGA<br>CUACGUA  | Weak+     |               |     |

|           |        |           |   |  |                                                  |                   |                                                          |                                          |           |               |     |
|-----------|--------|-----------|---|--|--------------------------------------------------|-------------------|----------------------------------------------------------|------------------------------------------|-----------|---------------|-----|
| KCTD12    | 115207 | NM_138444 | 0 |  |                                                  | YES               | D-015610-01<br>D-015610-02<br>D-015610-03<br>D-015610-04 | GGACAGC<br>GCUAUUA<br>GGGACAC<br>GACCAGA | Cytotoxic | Did not score | YES |
| KIAA0795  | 23276  | NM_025010 | 0 |  |                                                  | YES               | D-014549-01<br>D-014549-02<br>D-014549-03<br>D-014549-04 | GGGAUGA<br>GAGAGAU<br>GCCCGAA<br>GUGCGUU | Weak+     |               |     |
| KIAA0931  | 23035  | XM_041191 | 0 |  |                                                  |                   | D-022586-01<br>D-022586-02<br>D-022586-03<br>D-022586-04 | GAACUUG<br>GCUAUAA<br>GGAAAGA<br>GUACAGC | Weak+     |               |     |
| KIAA1107  | 23285  | XM_034086 | 0 |  |                                                  |                   | D-021628-01<br>D-021628-02<br>D-021628-03<br>D-021628-04 | GGAGUUA<br>GCAGACA<br>GCCCAGA<br>GAAGUUG | Cytotoxic | Did not score | YES |
| KIAA1160  | 57461  | NM_020701 | 0 |  |                                                  | YES               | D-013894-01<br>D-013894-02<br>D-013894-03<br>D-013894-04 | GCUGGGA<br>GUACUUA<br>GAAGUUC<br>GAGCCGA | Cytotoxic | Did not score | YES |
| KIAA1713  | 80816  | XM_290811 | 0 |  |                                                  | YES<br>YES        | D-023422-01<br>D-023422-02<br>D-023422-03<br>D-023422-04 | UCAGAAG<br>CCAAUUA<br>GGACACA<br>AAACUGA | Cytotoxic | Did not score |     |
| KIF11     | 3832   | NM_004523 | 0 |  | untreated<br>untreated<br>untreated<br>untreated |                   | D-003317-05<br>D-003317-06<br>D-003317-07<br>D-003317-08 | GCAGAAA<br>CAACAAG<br>CAGCAGA<br>CUAGAUG | Cytotoxic | Did not score | YES |
| KRT25B    | 353288 | NM_181539 | 0 |  |                                                  | YES               | D-018748-01<br>D-018748-02<br>D-018748-03<br>D-018748-04 | GGAACAC<br>CAAUAGC<br>GAGCAAC<br>CAACUUA | Weak+     |               |     |
| KRT25C    | 342574 | NM_181537 | 0 |  |                                                  | YES               | D-018754-01<br>D-018754-02<br>D-018754-03<br>D-018754-04 | GGACAUC<br>GCAAAGU<br>UCAGUGA<br>GAUGGCU | Weak+     |               |     |
| LAMA1     | 284217 | NM_005559 | 0 |  |                                                  | YES<br>YES        | D-012118-01<br>D-012118-02<br>D-012118-03<br>D-012118-04 | GAAAUGA<br>CUAAUAU<br>CACAAUC<br>GGUCAAU | Weak      |               |     |
| LOC150051 | 150051 | XM_097792 | 0 |  |                                                  | YES<br>YES<br>YES | D-024363-01<br>D-024363-02<br>D-024363-03<br>D-024363-04 | GGUACAG<br>GUGCACA<br>GGGAUUG<br>CAUAGGU | Medium    |               |     |
| LOC162835 | 162835 | XM_091830 | 0 |  |                                                  | YES               | D-023395-01<br>D-023395-02<br>D-023395-03<br>D-023395-04 | CGAAUAG<br>GCAAGUG<br>GAUUGGA<br>GAAUUGC | Cytotoxic | Did not score |     |
| LOC219612 | 0      | XM_168585 | 0 |  |                                                  | YES               | D-025428-01<br>D-025428-02<br>D-025428-03<br>D-025428-04 | GGAACGA<br>GCGCAA<br>GGAGAUU<br>CGUGAUU  | Weak+     |               |     |

|           |        |           |   |       |           |                   |                                                          |                                          |           |               |     |
|-----------|--------|-----------|---|-------|-----------|-------------------|----------------------------------------------------------|------------------------------------------|-----------|---------------|-----|
| LOC283989 | 283989 | NM_207346 | 0 |       |           | YES<br>YES<br>YES | D-022947-01<br>D-022947-02<br>D-022947-03<br>D-022947-04 | GAUGUGC<br>GAAAGAA<br>GCGGUUG<br>CCGUAUG | Cytotoxic | Did not score | YES |
| LOC284397 | 284397 | XM_209180 | 0 |       |           | YES<br>YES        | D-026191-01<br>D-026191-02<br>D-026191-03<br>D-026191-04 | GCAACCA<br>CCAUGUC<br>CCGCCUU<br>GGGUAAG | Weak+     |               |     |
| LOC285248 | 285248 | XM_211816 | 0 | Weak+ | untreated | YES<br>YES        | D-023664-01<br>D-023664-02<br>D-023664-03<br>D-023664-04 | AGACAGC<br>GAUGGAC<br>GAACUGA<br>CCAUUGC | Weak+     |               |     |
| LOC339451 | 339451 | NM_198317 | 0 |       |           | YES<br>YES        | D-031770-01<br>D-031770-02<br>D-031770-03<br>D-031770-04 | GAACAGU<br>GAACUGG<br>GCAAGUU<br>UCAACUC | Weak+     |               |     |
| LOC340017 | 340017 | XM_379288 | 0 |       | untreated |                   | D-028274-01<br>D-028274-02<br>D-028274-03<br>D-028274-04 | CGUGGAA<br>GGUAUGG<br>CCUGGUG<br>CAAGCAA | Medium    |               |     |
| LOC340843 | 340843 | XM_291726 | 0 |       |           |                   | D-026400-01<br>D-026400-02<br>D-026400-03<br>D-026400-04 | CUGGAAG<br>UGGGUCC<br>CCUGUGG<br>CAGUCUA | Medium    |               |     |
| LOC387601 | 387601 | NM_199352 | 0 |       |           | YES               | D-031740-01<br>D-031740-02<br>D-031740-03<br>D-031740-04 | GCAUUGA<br>GUGGAUA<br>GCUAGUA<br>GGUGGGA | Weak+     |               |     |
| LOC387921 | 387921 | XM_370722 | 0 |       |           | YES               | D-030217-01<br>D-030217-02<br>D-030217-03<br>D-030217-04 | CUACGAG<br>GAUCACG<br>CAGCAGA<br>CCAGUAC | Weak+     |               |     |
| LOC388474 | 388474 | XM_371115 | 0 |       |           | YES               | D-031048-01<br>D-031048-02<br>D-031048-03<br>D-031048-04 | CUAAGUC<br>AGACCAA<br>GCACUUU<br>GGUUAAC | Cytotoxic | Did not score |     |
| LOC388624 | 388624 | XM_371244 | 0 |       |           | YES               | D-027463-01<br>D-027463-02<br>D-027463-03<br>D-027463-04 | GAGCAGG<br>GAGACUG<br>CCAGAGC<br>GCUGGAA | Medium    |               |     |
| LOC389362 | 389362 | XM_374159 | 0 |       |           | YES<br>YES        | D-028632-01<br>D-028632-02<br>D-028632-03<br>D-028632-04 | UAACUUC<br>GCUAUA<br>AAAACAG<br>CUGCACA  | Weak+     |               |     |
| LOC389530 | 389530 | XM_291247 | 0 |       |           | YES               | D-028903-01<br>D-028903-02<br>D-028903-03<br>D-028903-04 | GAGCACA<br>UCUCAGA<br>GAUCGCC<br>UAAACAG | Weak+     |               |     |
| LOC391656 | 391656 | XM_373027 | 0 |       |           |                   | D-028288-01<br>D-028288-02<br>D-028288-03<br>D-028288-04 | GUUGUUG<br>CAAAAGC<br>AAAGUCC<br>CGAAGUC | Weak+     |               |     |

|           |        |           |   |        |           |                   |                                                          |                                            |                  |               |     |
|-----------|--------|-----------|---|--------|-----------|-------------------|----------------------------------------------------------|--------------------------------------------|------------------|---------------|-----|
| LOC392583 | 392583 | XM_374379 | 0 |        |           |                   | D-031678-01<br>D-031678-02<br>D-031678-03<br>D-031678-04 | GGGAAUC<br>GAAACAU<br>GGAAACCI<br>GCGCACA  | Weak+            |               |     |
| LOC399786 | 399786 | XM_378236 | 0 |        |           | YES               | D-029755-01<br>D-029755-02<br>D-029755-03<br>D-029755-04 | GAGAAAU<br>GGCAAAG<br>GGACUUC<br>GCAAGAC   | Weak+            |               |     |
| LOC401095 | 401095 | XM_376278 | 0 |        |           |                   | D-028187-01<br>D-028187-02<br>D-028187-03<br>D-028187-04 | UAGAGCA<br>CUACAGCA<br>GAACAAU<br>GACAGAA  | Weak+            |               |     |
| LOC401551 | 401551 | XM_376909 | 0 |        |           | YES               | D-029592-01<br>D-029592-02<br>D-029592-03<br>D-029592-04 | CGAGACA<br>CAGACUA<br>ACAGGAA<br>GGACUCC   | Weak+            |               |     |
| LOC90113  | 90113  | XM_291077 | 0 |        |           | YES               | D-023782-01<br>D-023782-02<br>D-023782-03<br>D-023782-04 | GAACCAC<br>GGGACCA<br>CCACUGU<br>CCAUAUA   | Weak+            |               |     |
| LRG47     | 345611 | XM_293893 | 0 |        |           | YES               | D-028450-01<br>D-028450-02<br>D-028450-03<br>D-028450-04 | CCACAAC<br>CCAAGAU<br>GCAAUGG<br>AGAAGGA   | Weak+            |               |     |
| LRRIQ2    | 79598  | NM_024548 | 0 |        | untreated | YES<br>YES<br>YES | D-018133-01<br>D-018133-02<br>D-018133-03<br>D-018133-04 | GACGUUG<br>GCAAACG<br>GAAAGCC<br>CCAAGAL   | Cytotoxic        | Did not score | YES |
| LRRK2     | 120892 | XM_058513 | 0 |        |           |                   | D-006323-01<br>D-006323-02<br>D-006323-03<br>D-006323-04 | GGAAGUU<br>GAGACA<br>GCCCAGG<br>AGACACU    | Medium           |               |     |
| MADD      | 8567   | NM_003682 | 0 |        |           | YES               | D-004429-01<br>D-004429-03<br>D-004429-05<br>D-004429-06 | GAAGUUC<br>GAAAUUC<br>GCAGUGA<br>ACACUGG   | Medium           |               |     |
| MAGEA2B   | 266740 | NM_153488 | 0 |        |           | YES               | D-019148-01<br>D-019148-02<br>D-019148-03<br>D-019148-04 | CAACUAC<br>GCCUCCA<br>GAAUGUU<br>CACUAAAC  | Medium           |               |     |
| MATN2     | 4147   | NM_002380 | 0 |        |           | YES<br>YES        | D-011329-01<br>D-011329-02<br>D-011329-03<br>D-011329-04 | GCACAAAC<br>GGAAAGG<br>GCAGCAC<br>GCAAUAUC | Cytotoxic Bypass | Did not score | YES |
| MATR3     | 9782   | NM_018834 | 0 |        |           |                   | D-017382-01<br>D-017382-02<br>D-017382-03<br>D-017382-04 | UAGAUGA<br>GACCAGG<br>ACCCAGU<br>CCAGUGA   | Weak             |               |     |
| MBL2      | 4153   | NM_000242 | 0 | Medium | untreated | YES               | D-011080-01<br>D-011080-02<br>D-011080-03<br>D-011080-04 | UGAUGAA<br>GGAAUAU<br>GUGAAGG<br>AGAAAUG   | Medium           |               |     |

|          |        |           |   |       |           |                          |                                                          |                                             |                  |               |     |
|----------|--------|-----------|---|-------|-----------|--------------------------|----------------------------------------------------------|---------------------------------------------|------------------|---------------|-----|
| MGC10992 | 92922  | NM_033212 | 0 |       | untreated | YES                      | D-015088-01<br>D-015088-02<br>D-015088-03<br>D-015088-04 | GCACUGG<br>CCAAUUG<br>GAUCCGC<br>GCGUUGA    | Cytotoxic Bypass | Weak+         |     |
| MGC11332 | 84804  | NM_032718 | 0 |       |           | YES                      | D-007357-01<br>D-007357-02<br>D-007357-03<br>D-007357-04 | CAGGCUA<br>CCACCAA<br>GGCCUGC<br>UAAACAAC   | Weak+            |               |     |
| MGC15737 | 85012  | NM_032926 | 0 |       |           | YES                      | D-018635-01<br>D-018635-02<br>D-018635-03<br>D-018635-04 | CACGAUA<br>AAGUAGA<br>GAGAGAG<br>CGAGGGA    | Cytotoxic        | Did not score | YES |
| MGC4170  | 79158  | NM_024312 | 0 |       |           |                          | D-031144-01<br>D-031144-02<br>D-031144-03<br>D-031144-04 | UCACGCA<br>GUACUAG<br>UCACAUAC<br>UCACAUAG  | Medium           |               |     |
| MGC42638 | 340561 | NM_178567 | 0 |       |           |                          | D-009099-01<br>D-009099-02<br>D-009099-03<br>D-009099-04 | GAAUUUA<br>UAAAGUU<br>CACCCAAC<br>GGGCCAG   | Weak+            |               |     |
| MGC8974  | 115353 | NM_052940 | 0 |       |           | YES<br>YES<br>YES        | D-018700-01<br>D-018700-02<br>D-018700-03<br>D-018700-04 | GGACAGG<br>AAACAGG<br>GAAGCGG<br>AAAGAGG    | Cytotoxic        | Did not score | YES |
| MIR      | 220972 | NM_145021 | 0 |       |           | YES<br>YES               | D-007161-01<br>D-007161-03<br>D-007161-04<br>D-007161-05 | GAGAAGA<br>AGAGUGA<br>AAGAUCAL<br>GAAUGGC   | Medium           |               |     |
| MIR16    | 51573  | NM_016641 | 0 |       |           | YES                      | D-009233-01<br>D-009233-02<br>D-009233-03<br>D-009233-04 | GAUUGGA<br>GCAGAGU<br>CAUCUUG<br>GAAAAGA    | Medium           |               |     |
| MMP2     | 4313   | NM_004530 | 0 |       |           | YES                      | D-005959-02<br>D-005959-03<br>D-005959-04<br>D-005959-06 | UACAACAC<br>GACAGUG<br>GCAAACAC<br>ACAAGAAC | Medium           |               |     |
| MOCOS    | 55034  | NM_017947 | 0 |       |           | YES<br>YES<br>YES<br>YES | D-020993-01<br>D-020993-02<br>D-020993-03<br>D-020993-04 | GCAGAAG<br>GGAAAAC<br>GGUCAAG<br>GAUUUCA    | Weak             |               |     |
| MPG      | 4350   | NM_002434 | 0 |       | untreated | YES                      | D-005146-01<br>D-005146-02<br>D-005146-03<br>D-005146-04 | GGAUCAA<br>GAAGCAG<br>ACAUCAU<br>GGCCCAU    | Cytotoxic        | Did not score |     |
| MSH2     | 4436   | NM_000251 | 0 | Weak+ | untreated |                          | D-003909-01<br>D-003909-04<br>D-003909-05<br>D-003909-06 | GAAGAGA<br>CAGCAAAC<br>CAGCUUU<br>GGAGGUA   | Medium           |               | YES |
| MSH4     | 4438   | NM_002440 | 0 |       |           | YES                      | D-019116-01<br>D-019116-02<br>D-019116-03<br>D-019116-04 | GAGAUUA<br>GAAAUAG<br>CGACCAG<br>GAAUAUC    | Cytotoxic Bypass | Did not score |     |

|        |       |           |   |  |        |           |  |                                                          |                                           |                  |               |     |
|--------|-------|-----------|---|--|--------|-----------|--|----------------------------------------------------------|-------------------------------------------|------------------|---------------|-----|
| MST1R  | 4486  | NM_002447 | 0 |  |        |           |  | D-003157-10<br>D-003157-11<br>D-003157-12<br>D-003157-13 | GUGGAGC<br>GACAGGG<br>CGACCCA<br>UAGAGGA  | Medium           |               |     |
| MUM1   | 84939 | NM_032853 | 0 |  |        |           |  | D-019083-01<br>D-019083-02<br>D-019083-03<br>D-019083-04 | UCGCUGA<br>CAAGUGU<br>CUAAUUC<br>GAUUAUG  | Cytotoxic        | Did not score | YES |
| NAB1   | 4664  | NM_005966 | 0 |  |        |           |  | D-015359-01<br>D-015359-02<br>D-015359-03<br>D-015359-04 | CUCGAGA<br>UGCCUUG<br>CAAUAUA<br>GAAGAGC  | Cytotoxic Bypass | Medium        |     |
| NIFUN  | 23479 | NM_014301 | 0 |  |        |           |  | D-012837-01<br>D-012837-02<br>D-012837-03<br>D-012837-04 | GAGGAAG<br>GAUUGUG<br>CUACUCA<br>GUGGUGA  | Cytotoxic        | Did not score |     |
| NIT1   | 4817  | NM_005600 | 0 |  |        |           |  | D-020022-01<br>D-020022-02<br>D-020022-03<br>D-020022-04 | GAAAGCA<br>CCUCAAC<br>GGCCUGA<br>CAAGAUU  | Weak+            |               |     |
| NPAT   | 4863  | NM_002519 | 0 |  |        |           |  | D-019599-01<br>D-019599-02<br>D-019599-03<br>D-019599-04 | ACAAGGA<br>CCAAAUAA<br>UGAAUUG<br>GAGCGAA | Cytotoxic        | Did not score | YES |
| NR6A1  | 2649  | NM_001489 | 0 |  |        |           |  | D-003431-01<br>D-003431-02<br>D-003431-03<br>D-003431-05 | CAACGAA<br>GAAGAAC<br>GAAGAUG<br>CCGAGGA  | Weak+            |               |     |
| NUP88  | 4927  | NM_002532 | 0 |  |        |           |  | D-017547-01<br>D-017547-02<br>D-017547-03<br>D-017547-04 | GGAAUUG<br>CCACUAA<br>GUUUGAA<br>UAAGGAU  | Cytotoxic        | Did not score | YES |
| PABPC4 | 8761  | NM_003819 | 0 |  |        |           |  | D-011528-01<br>D-011528-02<br>D-011528-03<br>D-011528-04 | GGGUGAA<br>GGAGAGA<br>CCAAUGC<br>GGUAAGA  | Medium           |               |     |
| PAFAH2 | 5051  | NM_000437 | 0 |  | Medium | untreated |  | D-008583-01<br>D-008583-03<br>D-008583-04<br>D-008583-05 | CCGAGUA<br>CAACUUG<br>GGACCUG<br>CAAUGGA  | Medium           |               |     |
| PDE1A  | 5136  | NM_005019 | 0 |  |        |           |  | D-007641-01<br>D-007641-02<br>D-007641-03<br>D-007641-04 | GCACUAA<br>UAAUUGG<br>CAAAUAG<br>GGAAGCA  | Medium           |               |     |
| PDE3B  | 5140  | NM_000922 | 0 |  |        |           |  | D-007646-02<br>D-007646-03<br>D-007646-04<br>D-007646-05 | GAAUACA<br>GACAUCA<br>GAACAGC<br>GGUGAUA  | Medium           |               |     |
| PDE5A  | 8654  | NM_001083 | 0 |  |        |           |  | D-007667-05<br>D-007667-06<br>D-007667-09<br>D-007667-10 | GAAGACA<br>GAAAUCA<br>GAUGACA<br>GGAAACG  | Medium           |               |     |

|         |        |           |   |  |                                     |            |                                                          |                                             |                  |               |     |
|---------|--------|-----------|---|--|-------------------------------------|------------|----------------------------------------------------------|---------------------------------------------|------------------|---------------|-----|
| PDIR    | 10954  | NM_006810 | 0 |  |                                     | YES<br>YES | D-019826-01<br>D-019826-02<br>D-019826-03<br>D-019826-04 | GCAAAGG<br>GGGAGAC<br>GGACGGU<br>GACCUGA    | Medium           |               |     |
| PHGDHL1 | 337867 | NM_177967 | 0 |  |                                     | YES        | D-017914-01<br>D-017914-02<br>D-017914-03<br>D-017914-04 | GAACCCAU<br>GGAAUGA<br>GCACAAG<br>UGAGAGU   | Strong           |               |     |
| PIAS3   | 10401  | NM_006099 | 0 |  |                                     | YES        | D-004164-05<br>D-004164-06<br>D-004164-07<br>D-004164-08 | GGAGCCA<br>CAAGUGC<br>GGAAUUA<br>GGCCCUA    | Medium           |               |     |
| PICALM  | 8301   | NM_007166 | 0 |  |                                     | YES        | D-004004-01<br>D-004004-02<br>D-004004-05<br>D-004004-06 | GUUAGUA<br>GAAAUUG<br>ACAGUUG<br>GUUCAAA    | Weak+            |               |     |
| PIK3C3  | 5289   | NM_002647 | 0 |  |                                     | YES<br>YES | D-005250-01<br>D-005250-02<br>D-005250-03<br>D-005250-04 | AUAGAUAA<br>GAACCAAC<br>GGAGGCA<br>ACUCAACA | Weak+            |               |     |
| PODXL   | 5420   | NM_005397 | 0 |  |                                     |            | D-010617-01<br>D-010617-02<br>D-010617-03<br>D-010617-04 | CAACAGAA<br>GGACAUG<br>GAAAUUG<br>GGACAAA   | Medium           |               |     |
| POLM    | 27434  | NM_013284 | 0 |  |                                     | YES        | D-010035-01<br>D-010035-02<br>D-010035-03<br>D-010035-04 | CGACACAA<br>GGACAUAA<br>CCAUGAA<br>GAACACU  | Cytotoxic Bypass | Did not score |     |
| POLR2I  | 5438   | NM_006233 | 0 |  | untreated                           | YES<br>YES | D-012248-01<br>D-012248-02<br>D-012248-03<br>D-012248-04 | GAACUGAA<br>GGUAUUC<br>CAAGAUC<br>GAACCGC   | Cytotoxic        | Did not score | YES |
| POLR3E  | 55718  | NM_018119 | 0 |  |                                     | YES<br>YES | D-020773-01<br>D-020773-02<br>D-020773-03<br>D-020773-04 | ACACGGAA<br>GAAGAGU<br>GGCCGAG<br>CGACGAG   | Cytotoxic        | Did not score | YES |
| PON1    | 5444   | NM_000446 | 0 |  |                                     |            | D-009229-01<br>D-009229-02<br>D-009229-03<br>D-009229-04 | GGAGAUG<br>GGUCGUA<br>GGAACCA<br>GCAAGUA    | Medium           |               |     |
| PORCN   | 64840  | NM_022825 | 0 |  |                                     | YES<br>YES | D-009613-01<br>D-009613-02<br>D-009613-03<br>D-009613-04 | GAUCUUC<br>UCACUUA<br>GGUGCGA<br>GGUCAAU    | Medium           |               |     |
| PPP2CA  | 5515   | NM_002715 | 0 |  |                                     | YES<br>YES | D-003598-01<br>D-003598-02<br>D-003598-03<br>D-003598-04 | GAGGUUC<br>UAACCAAC<br>GAACUUG<br>CGAGAAG   | Medium           |               |     |
| PRPF8   | 10594  | NM_006445 | 0 |  | untreated<br>untreated<br>untreated |            | D-012252-01<br>D-012252-02<br>D-012252-04<br>D-012252-05 | UGAAGCA<br>GCAGAUG<br>GGAAGAA<br>GAUAAGG    | Cytotoxic        | Did not score | YES |



|        |        |           |   |      |           |            |                                                          |                                                  |                  |               |     |
|--------|--------|-----------|---|------|-----------|------------|----------------------------------------------------------|--------------------------------------------------|------------------|---------------|-----|
| PSMA3  | 5684   | NM_002788 | 0 |      |           |            | D-011758-01<br>D-011758-02<br>D-011758-03<br>D-011758-04 | GACAUGA/<br>GCGCAAC/<br>GAUCUAA/<br>UAGCAGG/     | Cytotoxic        | Did not score |     |
| PTAFR  | 5724   | NM_000952 | 0 |      | untreated | YES        | D-005709-01<br>D-005709-02<br>D-005709-03<br>D-005709-04 | CAACGUC/<br>GCAAGCG/<br>CCACGGAI/<br>UAGCACC/    | Strong           |               |     |
| PTP4A2 | 8073   | NM_003479 | 0 |      |           | YES<br>YES | D-009078-01<br>D-009078-02<br>D-009078-03<br>D-009078-04 | CGAUUAC/<br>GAAAUAC/<br>GCAUUGC/<br>CGACUUU/     | Medium           |               |     |
| PTPLA  | 9200   | NM_014241 | 0 |      |           | YES        | D-008742-01<br>D-008742-02<br>D-008742-03<br>D-008742-04 | UGAGAUAA/<br>CAAUAAGA/<br>CCACAACU/<br>ACACACAC/ | Weak+            |               |     |
| PTPRK  | 5796   | NM_002844 | 0 |      |           | YES        | D-004204-01<br>D-004204-02<br>D-004204-03<br>D-004204-05 | CAACAUAA/<br>GAACGAC/<br>GAGAUCA/<br>GAAGUAG/    | Weak+            |               |     |
| RAB5A  | 5868   | NM_004162 | 0 |      |           | YES        | D-004009-01<br>D-004009-02<br>D-004009-03<br>D-004009-04 | GCAAGCA/<br>GGAAGAG/<br>AGGAAUC/<br>GAAGAGG/     | Weak+            |               |     |
| RAD51  | 5888   | NM_002875 | 0 |      |           |            | D-003530-02<br>D-003530-05<br>D-003530-07<br>D-003530-08 | GAAGCUAA/<br>GCAGUGA/<br>CCAACGAI/<br>AAGCUAU/   | Cytotoxic Bypass | Did not score |     |
| RASSF1 | 11186  | NM_007182 | 0 | Weak | untreated |            | D-017219-01<br>D-017219-02<br>D-017219-03<br>D-017219-04 | CUACAUA/<br>GCAAGAA/<br>CAAGGAC/<br>GACAAGG/     | Medium           |               |     |
| RCD-8  | 23644  | NM_014329 | 0 |      |           | YES        | D-016635-01<br>D-016635-02<br>D-016635-03<br>D-016635-04 | GGACCAU/<br>GAUGGAG/<br>UGACCAG/<br>GCCCACAG/    | Cytotoxic Bypass | Weak          | YES |
| RGL1   | 23179  | NM_015149 | 0 |      |           | YES        | D-008387-01<br>D-008387-02<br>D-008387-03<br>D-008387-04 | GACAAUG/<br>GCAAAGA/<br>GUAGACU/<br>GAAGACA/     | Medium           |               |     |
| RIMS4  | 140730 | NM_182970 | 0 |      |           |            | D-021322-01<br>D-021322-02<br>D-021322-03<br>D-021322-04 | CAAAGUC/<br>GCUCAGA/<br>GAGUUUG/<br>AGACACU/     | Cytotoxic        | Did not score | YES |
| RNASE1 | 6035   | NM_002933 | 0 |      |           | YES        | D-015643-01<br>D-015643-02<br>D-015643-03<br>D-015643-04 | GCAAACCA/<br>GCAGCUC/<br>GCAUAUG/<br>CCACUUU/    | Medium           |               |     |
| RPA1   | 6117   | NM_002945 | 0 |      |           |            | D-015749-01<br>D-015749-02<br>D-015749-03<br>D-015749-04 | GAAGUCA/<br>GGAAUGG/<br>GCAAUCCA/<br>GAAGUGC/    | Cytotoxic Bypass | Did not score | YES |

|         |        |           |   |  |           |                          |                                                          |                                          |                  |               |     |
|---------|--------|-----------|---|--|-----------|--------------------------|----------------------------------------------------------|------------------------------------------|------------------|---------------|-----|
| RPA2    | 6118   | NM_002946 | 0 |  |           | YES                      | D-017058-01<br>D-017058-02<br>D-017058-03<br>D-017058-04 | GAUCAAU<br>CAAAAUA<br>GAGUGAA<br>GUGGAAC | Cytotoxic        | Did not score |     |
| RPS29   | 6235   | NM_001032 | 0 |  |           |                          | D-011157-01<br>D-011157-02<br>D-011157-03<br>D-011157-04 | GGUCUGA<br>GGUUCUC<br>CAAUAUG<br>ACGCGAA | Cytotoxic        | Did not score |     |
| RUVBL1  | 8607   | NM_003707 | 0 |  |           | YES                      | D-008977-01<br>D-008977-02<br>D-008977-03<br>D-008977-04 | GCAGAAA<br>CAACUGA<br>GAAAGAG<br>CAAAGGA | Weak+            |               |     |
| RUVBL2  | 10856  | NM_006666 | 0 |  |           |                          | D-012299-01<br>D-012299-02<br>D-012299-03<br>D-012299-04 | UAACAAG<br>CGCAGUA<br>UCAACGA<br>ACGCAAG | Cytotoxic        | Did not score | YES |
| SCFD1   | 23256  | NM_016106 | 0 |  |           | YES<br>YES<br>YES<br>YES | D-010943-01<br>D-010943-02<br>D-010943-03<br>D-010943-04 | GACAAUA<br>CGAAACU<br>UAAGGAG<br>GCAAGAA | Cytotoxic        | Did not score | YES |
| SCN11A  | 11280  | NM_014139 | 0 |  |           | YES<br>YES               | D-006296-02<br>D-006296-04<br>D-006296-05<br>D-006296-06 | GAAUAGC<br>CGAAAGA<br>GGAACAG<br>CGCCGAG | Weak+            |               |     |
| SCN4A   | 6329   | NM_000334 | 0 |  |           | YES                      | D-006300-01<br>D-006300-02<br>D-006300-05<br>D-006300-06 | ACACAGG<br>CAUCAAG<br>GUACAAG<br>GCAAUGA | Weak+            |               |     |
| SF3A1   | 10291  | NM_005877 | 0 |  | untreated |                          | D-016051-01<br>D-016051-02<br>D-016051-03<br>D-016051-04 | GUAAGAA<br>CAUCUUC<br>CAGAUCC<br>GAACACA | Cytotoxic        | Did not score | YES |
| SF3B2   | 10992  | XM_290506 | 0 |  |           | YES<br>YES               | D-026599-01<br>D-026599-02<br>D-026599-03<br>D-026599-04 | GAGAGAA<br>UAUGACA<br>UGACAUC<br>GGACAAA | Cytotoxic        | Did not score | YES |
| SIX4    | 51804  | NM_017420 | 0 |  |           |                          | D-020267-01<br>D-020267-02<br>D-020267-03<br>D-020267-04 | CCAGUGG<br>GAUGGAG<br>UGUCUUA<br>GUAUACA | Weak+            |               | YES |
| SLC22A9 | 114571 | NM_080866 | 0 |  |           | YES                      | D-007460-01<br>D-007460-02<br>D-007460-03<br>D-007460-04 | CCACUGG<br>CAACUUU<br>GGAAUGU<br>GCUCCAA | Medium           |               |     |
| SLC39A3 | 29985  | NM_144564 | 0 |  |           | YES                      | D-007571-01<br>D-007571-02<br>D-007571-03<br>D-007571-04 | GGGAGAA<br>UCAUCGA<br>GCAGCGA<br>CGGCCAA | Cytotoxic Bypass | Weak          |     |
| SLC6A3  | 6531   | NM_001044 | 0 |  |           | YES                      | D-007603-01<br>D-007603-03<br>D-007603-04<br>D-007603-05 | GAGCAUA<br>CUACGGA<br>UCACGCU<br>CGAGGCG | Weak+            |               |     |

|          |        |             |   |       |                                     |                   |                                                          |                                             |                  |               |     |
|----------|--------|-------------|---|-------|-------------------------------------|-------------------|----------------------------------------------------------|---------------------------------------------|------------------|---------------|-----|
| SLC9A10  | 285335 | XM_210562   | 0 |       |                                     |                   | D-023575-01<br>D-023575-02<br>D-023575-03<br>D-023575-04 | GAGAUAA<br>GAUCGUG<br>GAUCAGAI<br>GCUAACCC  | Weak+            |               |     |
| SPAG5    | 10615  | NM_006461   | 0 |       |                                     | YES               | D-006839-01<br>D-006839-02<br>D-006839-03<br>D-006839-04 | CAAAUUAA<br>CUAAAGAA<br>CGACAUG<br>ACAAGUCI | Cytotoxic Bypass | Did not score | YES |
| SRD5A2L2 | 253017 | NM_00101087 | 0 |       |                                     | YES               | D-024084-01<br>D-024084-02<br>D-024084-03<br>D-024084-04 | GAUAAUG<br>CCAAAGAA<br>UCAAUUG<br>GUUAACA   | Weak+            |               |     |
| SRPK2    | 6733   | NM_182691   | 0 |       |                                     |                   | D-004839-05<br>D-004839-06<br>D-004839-07<br>D-004839-08 | GAACAUAA<br>GCAGAACC<br>UGAAGAG<br>GACCCUAA | Medium           |               |     |
| SSBP1    | 6742   | NM_003143   | 0 |       |                                     | YES               | D-021365-01<br>D-021365-02<br>D-021365-03<br>D-021365-04 | CAACAACA<br>GAAUUUAA<br>UGAGUGA<br>AGACAUG  | Cytotoxic Bypass | Did not score | YES |
| STAC     | 6769   | NM_003149   | 0 |       |                                     | YES               | D-019732-01<br>D-019732-02<br>D-019732-03<br>D-019732-04 | GGAGACA<br>GAACCUU<br>GCGAAGA<br>GUGUUUA    | Medium           |               |     |
| STK6     | 6790   | NM_003600   | 0 |       | untreated<br>untreated<br>untreated | YES               | D-003545-02<br>D-003545-05<br>D-003545-18<br>D-003545-19 | GAACUUAA<br>CAAUUGCC<br>UUCUUAG<br>GUACAUG  | Cytotoxic        | Did not score | YES |
| STX6     | 10228  | NM_005819   | 0 |       |                                     | YES<br>YES<br>YES | D-017164-01<br>D-017164-02<br>D-017164-03<br>D-017164-04 | GCAACUG<br>CCAACGAA<br>GAUCAGAI<br>CAGCAUAA | Cytotoxic        | Did not score | YES |
| SUHW3    | 55609  | NM_017666   | 0 |       |                                     | YES<br>YES        | D-007013-01<br>D-007013-02<br>D-007013-03<br>D-007013-04 | AGAAAGAA<br>GGAGAGA<br>GUCCAGAA<br>ACAAAGAA | Weak             |               | YES |
| TCF12    | 6938   | NM_003205   | 0 | Weak+ | untreated                           | YES<br>YES<br>YES | D-006356-01<br>D-006356-02<br>D-006356-05<br>D-006356-06 | GCACAGAA<br>GAACAAG<br>UCGAUCA<br>CAUGACCC  | Weak             |               | YES |
| TCFL1    | 6944   | NM_005997   | 0 |       |                                     |                   | D-020097-01<br>D-020097-02<br>D-020097-03<br>D-020097-04 | GGAAGAG<br>UCACAGAA<br>AGAAGCAA<br>CAUUAGAA | Weak             |               | YES |
| TERF2IP  | 54386  | NM_018975   | 0 |       |                                     | YES               | D-021219-01<br>D-021219-02<br>D-021219-03<br>D-021219-04 | GAUGAGAA<br>GGUAACG<br>AAUAAGAA<br>UGAGAGC  | Cytotoxic        | Did not score | YES |
| TFAP2B   | 7021   | NM_003221   | 0 |       |                                     | YES<br>YES<br>YES | D-017730-01<br>D-017730-02<br>D-017730-03<br>D-017730-04 | AGGAGAA<br>GGACCAG<br>GCAAGAA<br>GCGCAAA    | Medium           |               |     |

|         |       |           |   |        |           |                   |                                                          |                                          |           |               |     |
|---------|-------|-----------|---|--------|-----------|-------------------|----------------------------------------------------------|------------------------------------------|-----------|---------------|-----|
| TOR2A   | 27433 | NM_130459 | 0 |        |           |                   | D-015292-01<br>D-015292-02<br>D-015292-03<br>D-015292-04 | GUUCAGC<br>GCUACAA<br>CGGACC<br>UGUCAUU  | Medium    |               |     |
| TPBG    | 7162  | NM_006670 | 0 | Weak   | untreated | YES               | D-004304-01<br>D-004304-02<br>D-004304-03<br>D-004304-04 | GGAAGGG<br>GUGCUGA<br>GGACUUA<br>GGAUUCG | Medium    |               |     |
| TPR     | 7175  | NM_003292 | 0 |        |           | YES<br>YES<br>YES | D-010548-01<br>D-010548-02<br>D-010548-04<br>D-010548-05 | GAAGUAA<br>GAACAAA<br>GAACAAC<br>GCACAGC | Weak      |               | YES |
| TPTE    | 7179  | NM_013315 | 0 |        |           | YES               | D-008745-02<br>D-008745-03<br>D-008745-04<br>D-008745-05 | GAAAUUU<br>UUUUAUC<br>GCACGGA<br>UAAGAAG | Medium    |               |     |
| TRA1    | 7184  | NM_003299 | 0 | Medium | untreated | YES               | D-006417-04<br>D-006417-05<br>D-006417-06<br>D-006417-07 | GAACACG<br>GGACGGG<br>GAAGAUG<br>GCGAUUA | Weak+     |               |     |
| TUBA8   | 51807 | NM_018943 | 0 |        |           | YES               | D-009374-01<br>D-009374-02<br>D-009374-03<br>D-009374-04 | GCAGGAA<br>GAUGGAA<br>GGAUGUG<br>ACACCAC | Medium    |               |     |
| TULP2   | 7288  | NM_003323 | 0 | Weak   | untreated | YES               | D-011414-01<br>D-011414-02<br>D-011414-03<br>D-011414-04 | GAACAGG<br>GCACCAA<br>GCACGAA<br>GCACGGA | Medium    |               |     |
| UBE2D1  | 7321  | NM_003338 | 0 |        |           | YES               | D-009387-02<br>D-009387-03<br>D-009387-04<br>D-009387-05 | CAACAGC<br>GAAAGAA<br>UACCAGU<br>GCACAAU | Weak+     |               |     |
| UGT2B15 | 7366  | NM_001076 | 0 |        |           | YES               | D-020194-05<br>D-020194-06<br>D-020194-07<br>D-020194-08 | AAGGAUA<br>GUAGCUA<br>UAAAGUG<br>UGGAAAC | Medium    |               |     |
| USP14   | 9097  | NM_005151 | 0 |        |           | YES               | D-006065-02<br>D-006065-03<br>D-006065-05<br>D-006065-06 | GCAUAUC<br>GGACUUA<br>CAAGAUG<br>GGAGUUA | Weak      |               |     |
| USP31   | 57478 | NM_020718 | 0 |        |           | YES               | D-022513-01<br>D-022513-02<br>D-022513-03<br>D-022513-04 | GAACCAA<br>GUAGACA<br>CCUCAAA<br>CAGCAUA | Weak+     |               |     |
| UTP14A  | 10813 | NM_006649 | 0 |        |           | YES               | D-016395-01<br>D-016395-02<br>D-016395-03<br>D-016395-04 | GAAAUUC<br>GCAACUG<br>GGUGCUG<br>AACCAUA | Cytotoxic | Did not score | YES |
| WFDC2   | 10406 | NM_006103 | 0 |        |           | YES<br>YES        | D-010564-01<br>D-010564-02<br>D-010564-03<br>D-010564-04 | CCGCAAU<br>GGGAAGG<br>UGUCCUG<br>GCGAAUG | Medium    |               |     |

|                |              |                  |          |  |  |                          |                                                          |                                          |                         |                      |            |
|----------------|--------------|------------------|----------|--|--|--------------------------|----------------------------------------------------------|------------------------------------------|-------------------------|----------------------|------------|
| <b>XAB1</b>    | <b>11321</b> | <b>NM_007266</b> | <b>0</b> |  |  | <b>YES</b>               | D-021485-01<br>D-021485-02<br>D-021485-03<br>D-021485-04 | GGAGUAA<br>GAGACUA<br>GUUUUCA<br>GAUGAAC | <b>Cytotoxic</b>        | <b>Did not score</b> |            |
| <b>ZBTB2</b>   | <b>57621</b> | <b>NM_020861</b> | <b>0</b> |  |  | <b>YES</b>               | D-014129-01<br>D-014129-02<br>D-014129-03<br>D-014129-04 | GAUCAUA<br>CAGGUGA<br>CGACCCG<br>AGACGAA | <b>Cytotoxic</b>        | <b>Did not score</b> | <b>YES</b> |
| <b>ZCWCC3</b>  | <b>23515</b> | <b>NM_015358</b> | <b>0</b> |  |  |                          | D-012976-01<br>D-012976-02<br>D-012976-03<br>D-012976-04 | GCAAGUG<br>GCGACAA<br>GCAAGGU<br>CGAGUAA | <b>Weak+</b>            |                      |            |
| <b>ZMYND10</b> | <b>51364</b> | <b>NM_015896</b> | <b>0</b> |  |  |                          | D-021401-01<br>D-021401-02<br>D-021401-03<br>D-021401-04 | CAUCUGA<br>GAGGGCA<br>GGAACCA<br>GUACUAC | <b>Medium</b>           |                      |            |
| <b>ZNF271</b>  | <b>10778</b> | <b>NM_006629</b> | <b>0</b> |  |  | <b>YES</b><br><b>YES</b> | D-015671-01<br>D-015671-02<br>D-015671-03<br>D-015671-04 | GCACAUG<br>GAGAAAA<br>GCAGGAA<br>GUUCUGA | <b>Cytotoxic Bypass</b> | <b>Did not score</b> |            |
| <b>ZNF462</b>  | <b>58499</b> | <b>NM_021224</b> | <b>0</b> |  |  | <b>YES</b>               | D-018036-01<br>D-018036-02<br>D-018036-03<br>D-018036-04 | GAGCAUG<br>ACACCUA<br>UGUAGGC<br>ACGGUUU | <b>Cytotoxic Bypass</b> | <b>Did not score</b> | <b>YES</b> |

Supplementary Table 4

| Gene Symbol | Entrez Gene ID | Accession | # chkpt siRNAs | OTP Score                            | MI Untreated | MMC Sensitivity          | HR Assay                                         | Catalog Num                                              | Sequence                                 | Secondary Score | Primary Score | Cytotoxic Score | pSQTO | Chr. Location     |
|-------------|----------------|-----------|----------------|--------------------------------------|--------------|--------------------------|--------------------------------------------------|----------------------------------------------------------|------------------------------------------|-----------------|---------------|-----------------|-------|-------------------|
| ABHD3       | 171586         | NM_138340 | 2              | Weak<br>Weak                         |              |                          |                                                  | J-008587-05<br>J-008587-06<br>J-008587-07<br>J-008587-08 | GAUCGUG<br>CUUCAGU<br>UGAACUC<br>GGAGGAA | 2               | Weak          |                 |       | 18q11.2           |
| ABTB2       | 25841          | NM_145804 | 0              |                                      |              | YES<br>YES               |                                                  | J-016671-05<br>J-016671-06<br>J-016671-07<br>J-016671-08 | CGUGAAC<br>GUAUGAC<br>CCACACG<br>GGAGGAA | 3               | Medium        |                 |       | 11p13             |
| ADNP        | 23394          | NM_015339 | 2              | Weak<br>Weak                         |              | YES                      | Increased                                        | J-012857-09<br>J-012857-10<br>J-012857-11<br>J-012857-12 | CGAAGAC<br>GGACAAU<br>GGAAGAA<br>GGACCCA | 1               | Medium        |                 | YES   | 20q13.13          |
| AKAP8       | 10270          | NM_005858 | 2              | Weak<br>Medium                       |              | YES<br>YES               | Decreased                                        | J-009656-06<br>J-009656-07<br>J-009656-08<br>J-009656-09 | GUCCAUG<br>GGAACGA<br>GAACAAC<br>GAUCGAG | 2               | Weak+         |                 |       | 19p13.1           |
| APTX        | 54840          | NM_175069 | 0              |                                      |              |                          | Increased                                        | J-013368-05<br>J-013368-06<br>J-013368-07<br>J-013368-08 | ACAAGAG<br>ACAGAAU<br>CAAAGGC<br>GAAAGAA | 2               | Weak+         |                 |       | 9p13.3            |
| ASB17       | 127247         | NM_080868 | 0              |                                      |              |                          |                                                  | J-015284-05<br>J-015284-06<br>J-015284-07<br>J-015284-08 | GAGUAAU<br>CAGAUUA<br>UGAAUUG<br>UUAUGUA | 2               | Strong        |                 |       | 1p31.1            |
| ASH2L       | 9070           | NM_004674 | 1              | Weak                                 |              |                          |                                                  | J-019831-05<br>J-019831-06<br>J-019831-07<br>J-019831-08 | AAAGAUG<br>GGACCAU<br>GAGAAGG<br>GAGACAG | 2               | Medium        |                 |       | 8p11.2            |
| ATBF1       | 463            | NM_006885 | 1              | Weak                                 |              | YES<br>YES               | Increased                                        | J-015412-05<br>J-015412-06<br>J-015412-07<br>J-015412-08 | GAACAAG<br>CCAAGAG<br>GACAAGC<br>GUACAGA | 2               | Weak          |                 | YES   | 16q22.3-<br>q23.1 |
| ATR         | 545            | NM_001184 | 4              | Strong<br>Strong<br>Strong<br>Strong |              | YES<br>YES<br>YES<br>YES | Decreased<br>Decreased<br>Decreased<br>Decreased | J-003202-19<br>J-003202-20<br>J-003202-21<br>J-003202-22 | GAGAAAG<br>GCAACUC<br>CCACGAA<br>CCGCUAA | 4               | Strong        |                 |       | 3q22-q24          |
| AUP1        | 550            | NM_012103 | 1              | Weak                                 |              | YES                      |                                                  | J-012410-09<br>J-012410-10<br>J-012410-11<br>J-012410-12 | GCACUAU<br>GCAGAUU<br>GAGCACA<br>CGACCAC | 1               | Weak+         |                 |       | 2p13              |
| AZI1        | 22994          | XM_045581 | 3              | Medium<br>Medium<br>Weak+            |              | YES<br>YES<br>YES        | Increased                                        | J-023335-05<br>J-023335-06<br>J-023335-07<br>J-023335-08 | AGAUIUG<br>CGAAGAA<br>CCUGGAA<br>CAACGGA | 2               | Cytotoxic     | Did not score   | YES   | 17q25.3           |
| BRCA1       | 672            | NM_007294 | 4              | Medium<br>Weak<br>Medium<br>Strong   |              | YES<br>YES<br>YES<br>YES | Decreased<br>Decreased<br>Decreased<br>Decreased | J-003461-09<br>J-003461-10<br>J-003461-11<br>J-003461-12 | CAACAUG<br>CCAAGGC<br>UGAUAAA<br>GAAGGAG |                 | Did not score |                 | YES   | 17q21             |
| BRCA2       | 675            | NM_000059 | 4              | Medium<br>Strong<br>Strong<br>Strong |              | YES<br>YES<br>YES<br>YES | Decreased<br>Decreased<br>Decreased              | J-003462-05<br>J-003462-06<br>J-003462-07<br>J-003462-08 | GAAACGG<br>GGUAUCA<br>GAAGAAU<br>UAAGGAA | 4               | Medium        |                 | YES   | 13q12.3           |
| BRE         | 9577           | NM_004899 | 1              | Weak+                                |              | YES<br>YES<br>YES        |                                                  | J-010210-06<br>J-010210-07<br>J-010210-08<br>J-010210-09 | GAGGAUA<br>CGUGGAA<br>GCAACAA<br>UGAUUAC | 2               | Medium        |                 |       | 2p23.2            |
| BRIP1       | 83990          | NM_032043 | 4              | Medium<br>Weak<br>Weak<br>Medium     |              | YES<br>YES<br>YES        |                                                  | J-010587-05<br>J-010587-06<br>J-010587-07<br>J-010587-08 | AGUCAAG<br>GAUAGUA<br>UAACCAA<br>GUGCAAA | 2               | Medium        |                 |       | 17q22-q24         |

|               |        |            |   |                               |           |                          |           |                                                          |                                           |   |                  |               |     |               |
|---------------|--------|------------|---|-------------------------------|-----------|--------------------------|-----------|----------------------------------------------------------|-------------------------------------------|---|------------------|---------------|-----|---------------|
| BTG1          | 694    | NM_001731  | 1 | Weak                          | untreated | YES<br>YES<br>YES        |           | J-011598-05<br>J-011598-06<br>J-011598-07<br>J-011598-08 | GUAUUCG<br>UAUGAAG<br>GCAGAAC<br>UAAGAUA  | 2 | Medium           |               |     | 12q22         |
| C13ORF23      | 80209  | NM_025138  | 1 | Weak                          |           | YES                      |           | J-012952-05<br>J-012952-06<br>J-012952-07<br>J-012952-08 | UAACAAU<br>AGGAAGA<br>GCAUUCAC<br>CCAAUGA | 2 | Cytotoxic Bypass | Medium        |     | 13q13.3       |
| C14ORF150     | 112840 | NM_080666  | 2 | Weak<br>Weak                  |           | YES<br>YES               |           | J-015254-09<br>J-015254-10<br>J-015254-11<br>J-015254-12 | GGUUAAG<br>GCGGACU<br>GCACCAAC<br>GACUCGA | 2 | Weak             |               |     | 14q23.2       |
| C14ORF25      | 319089 | XM_375077  | 1 | Weak                          |           | YES<br>YES               |           | J-021942-05<br>J-021942-06<br>J-021942-07<br>J-021942-08 | GAGAGGA<br>GGAAUAC<br>GGAAAGC<br>CCACAAG  | 2 | Medium           |               |     | 14q21.1       |
| C1ORF180 (FL) | 439927 | M_00103366 | 0 |                               |           | YES                      | Decreased | J-033183-05<br>J-033183-06<br>J-033183-07<br>J-033183-08 | CCAUUGG<br>CCACUAG<br>AAACCAAC<br>UGGACUA | 1 | Weak+            |               |     | 1p22.3        |
| C1ORF54       | 79630  | NM_024579  | 3 | Medium<br>Weak<br>Weak        |           | YES<br>YES<br>YES        | Increased | J-014374-09<br>J-014374-10<br>J-014374-11<br>J-014374-12 | GCAAUAG<br>GGCUGAA<br>GGGAUGU<br>AUUAUCA  | 2 | Medium           |               |     | 1q21.2        |
| CDS1          | 1040   | NM_001263  | 0 |                               |           | YES                      |           | J-008680-09<br>J-008680-10<br>J-008680-11<br>J-008680-12 | AUUCUGA<br>AUGAGUA<br>GAUGUAA<br>CAACCUG  | 3 | Medium           |               |     | 4q21.23       |
| CLIC3         | 9022   | NM_004669  | 3 | Weak+<br>Medium<br>Medium     |           | YES<br>YES<br>YES        | Increased | J-011805-05<br>J-011805-06<br>J-011805-07<br>J-011805-08 | GGAGAAA<br>GCACAUC<br>AGACAGA<br>CGGACGU  | 3 | Cytotoxic Bypass | Medium        |     | 9q34.3        |
| CLOCK         | 9575   | NM_004898  | 4 | Weak<br>Weak<br>Weak+<br>Weak |           | YES<br>YES<br>YES<br>YES | Increased | J-008212-05<br>J-008212-06<br>J-008212-07<br>J-008212-08 | CAACUUG<br>CGACAGG<br>GAACAAC<br>CUAGAAA  | 3 | Medium           |               |     | 4q12          |
| CLSPN         | 63967  | NM_022111  | 1 | Weak                          |           | YES<br>YES               |           | J-005288-05<br>J-005288-06<br>J-005288-07<br>J-005288-08 | GCAGAU<br>GAGUAGA<br>GCAGAU<br>GAAGACA    |   | Did not score    | YES           |     | 1p34.2        |
| CPSF2         | 53981  | NM_017437  | 2 | Weak<br>Strong                |           | YES<br>YES<br>YES        | Increased | J-013404-05<br>J-013404-06<br>J-013404-07<br>J-013404-08 | GAUCAGA<br>UUGGAUA<br>UAUCUGA<br>GAACUGU  | 2 | Weak+            |               |     | 14q31.1       |
| DATF1         | 11083  | NM_033081  | 2 | Weak<br>Weak                  |           | YES<br>YES<br>YES        |           | J-004419-06<br>J-004419-07<br>J-004419-08<br>J-004419-09 | CGCCGUC<br>GGGAUAA<br>GGGCGAG<br>AGAGUAA  | 2 | Cytotoxic Bypass | Weak+         |     | 20q13.33      |
| DHX9          | 1660   | NM_001357  | 4 | Weak<br>Weak<br>Weak<br>Weak  |           | YES<br>YES               |           | J-009950-05<br>J-009950-06<br>J-009950-07<br>J-009950-08 | GGAUUAA<br>GGCUUUG<br>CAAACAAC<br>GUAAUUG | 1 | Strong           | YES           |     | 1q25          |
| DJ159A19.3    | 27245  | XM_372774  | 1 | Weak                          |           | YES<br>YES               | Increased | J-027522-09<br>J-027522-10<br>J-027522-11<br>J-027522-12 | CUGGGAA<br>CCAGAGU<br>UCUUUGA<br>GGGCAAA  | 2 | Cytotoxic        | Did not score | YES | 1p36.13       |
| DKFZP434B168  | 25896  | NM_015434  | 3 | Weak+<br>Medium<br>Medium     |           | YES<br>YES<br>YES        |           | J-013972-05<br>J-013972-06<br>J-013972-07<br>J-013972-08 | GAGUUUG<br>CCAAUGG<br>UCAAGAC<br>CAAGCCU  | 3 | Medium           |               |     | 1q36.13-q42.3 |
| DKFZP566K052  | 26095  | NM_015605  | 2 | Weak<br>Weak                  |           | YES<br>YES               |           | J-013909-05<br>J-013909-06<br>J-013909-07<br>J-013909-08 | CGAAGGA<br>CAGAGCC<br>CAGAUUC<br>GCAGGAA  | 1 | Weak             | YES           |     | 10q11.22      |

|          |        |           |   |                                  |  |                          |                        |                                                          |                                            |   |                  |        |                  |
|----------|--------|-----------|---|----------------------------------|--|--------------------------|------------------------|----------------------------------------------------------|--------------------------------------------|---|------------------|--------|------------------|
| DMC1     | 11144  | NM_007068 | 2 | Weak<br>Weak                     |  |                          | Increased              | J-009551-05<br>J-009551-06<br>J-009551-07<br>J-009551-08 | GGACAUU<br>CCAGGAA<br>AGAAUAA<br>GAACAAA   | 2 | Medium           |        | 22q13.1          |
| DNMT3B   | 1789   | NM_006892 | 4 | Weak<br>Weak+<br>Weak+<br>Medium |  | YES<br>YES<br>YES<br>YES | Increased              | J-006395-07<br>J-006395-08<br>J-006395-09<br>J-006395-10 | ACGCACA<br>UUUACCA<br>CGAAAUAA<br>GCUCUUAA | 3 | Medium           |        | 20q11.2          |
| FANCL    | 55120  | NM_018062 | 3 | Medium<br>Medium<br>Medium       |  | YES                      | Increased<br>Decreased | J-021486-05<br>J-021486-06<br>J-021486-07<br>J-021486-08 | GCGGAUA<br>CAGCUGA<br>AGUGUUG<br>GCAAUAG   | 3 | Medium           |        | 2p16.1           |
| FERD3L   | 222894 | NM_152898 | 2 | Weak<br>Medium                   |  | YES<br>YES               | Increased<br>Decreased | J-008437-09<br>J-008437-10<br>J-008437-11<br>J-008437-12 | CCACGUU<br>CGCGAAA<br>GGAAGAG<br>ACACUACC  | 2 | Weak+            |        | 7p21.1           |
| FKBP5    | 2289   | NM_004117 | 0 |                                  |  | YES                      |                        | J-004224-06<br>J-004224-07<br>J-004224-08<br>J-004224-09 | GAGAUUG<br>CGAAAGC<br>GCAAUAU<br>GAAAGGA   | 2 | Weak             | YES    | 6p21.3-<br>p21.2 |
| FLJ20534 | 54969  | NM_017867 | 0 |                                  |  | YES                      |                        | J-020849-09<br>J-020849-10<br>J-020849-11<br>J-020849-12 | GACCAUU<br>CUGGAAA<br>AGACAAU<br>AUAAUCU   | 2 | Weak+            |        | 4q33             |
| FLJ22729 | 79736  | NM_024683 | 2 | Weak<br>Weak                     |  | YES<br>YES<br>YES        | Increased              | J-014410-09<br>J-014410-10<br>J-014410-11<br>J-014410-12 | GGGCUCA<br>CCAAAGC<br>AUGCAAA<br>AGUGACC   | 2 | Weak+            |        | 17q11.2          |
| FLJ23703 | 200197 | NM_182534 | 3 | Weak<br>Weak+<br>Weak            |  | YES                      |                        | J-018885-09<br>J-018885-10<br>J-018885-11<br>J-018885-12 | CUAGAAA<br>CAAGAAA<br>AAGCAGA<br>CGUAAUG   | 2 | Medium           |        | 1p36.21          |
| FLJ25955 | 164781 | NM_178821 | 0 |                                  |  | YES<br>YES               |                        | J-017857-09<br>J-017857-10<br>J-017857-11<br>J-017857-12 | UCAACAA<br>GCUAUGA<br>CAGAACA<br>ACUCACA   | 3 | Weak+            |        | 2q36.3           |
| FLJ31846 | 160857 | NM_144974 | 0 |                                  |  | YES                      | Increased              | J-016742-09<br>J-016742-10<br>J-016742-11<br>J-016742-12 | GUUAAAU<br>CCAGGAG<br>CUGGCUA<br>CAGUUUG   | 1 | Cytotoxic Bypass | Medium | 13q14.11         |
| FLJ34907 | 284222 | XM_290817 | 0 |                                  |  | YES<br>YES               | Increased              | J-023377-09<br>J-023377-10<br>J-023377-11<br>J-023377-12 | GCAUGAU<br>UGGAAGA<br>GCACAGA<br>GGAAGU    | 1 | Weak             |        | 18p11.22         |
| FLJ36561 | 150248 | NM_182520 | 4 | Weak<br>Weak<br>Medium<br>Medium |  | YES<br>YES<br>YES        |                        | J-018678-09<br>J-018678-10<br>J-018678-11<br>J-018678-12 | ACAACUG<br>AAGACAG<br>CCUUGGG<br>GAGCAAA   | 3 | Medium           |        | 22q11.23         |
| FLJ45645 | 375287 | NM_198557 | 1 | Weak                             |  |                          |                        | J-027267-09<br>J-027267-10<br>J-027267-11<br>J-027267-12 | GAAUAG<br>GGAUUGA<br>GCGGAAG<br>CCGUGUA    | 2 | Weak+            |        | 2q23.3           |
| FLJ46365 | 401459 | NM_207504 | 2 | Weak+<br>Weak+                   |  | YES<br>YES               | Decreased              | J-032187-09<br>J-032187-10<br>J-032187-11<br>J-032187-12 | CCUCAAG<br>AGACUGA<br>GUGCAUU<br>GGUCACC   | 2 | Medium           |        | 8q11.21          |
| HCCA2    | 81532  | NM_053005 | 1 | Weak                             |  |                          |                        | J-019362-09<br>J-019362-10<br>J-019362-11<br>J-019362-12 | GAGAUUG<br>GGAGAGA<br>GAGCACA<br>CAUCUGU   | 2 | Medium           |        | 11p15.5          |
| FLJ12671 | 81875  | NM_030980 | 0 |                                  |  | YES<br>YES               | Increased              | J-014692-05<br>J-014692-06<br>J-014692-07<br>J-014692-08 | GGAGCUA<br>UAGCAAG<br>CGGAGAG<br>CAGAAGA   | 1 | Medium           |        | 1q23.1           |



|           |        |           |   |                                             |           |                   |                                     |                                                          |                                            |   |           |               |     |          |
|-----------|--------|-----------|---|---------------------------------------------|-----------|-------------------|-------------------------------------|----------------------------------------------------------|--------------------------------------------|---|-----------|---------------|-----|----------|
| KAB       | 9859   | NM_014812 | 1 | Weak                                        |           |                   |                                     | J-021258-05<br>J-021258-06<br>J-021258-07<br>J-021258-08 | GAAGUAA<br>UAAGGAA<br>CCUACAAA<br>AAGCAUAC | 2 | Weak      |               | YES | 1q44     |
| KIAA1446  | 57596  | NM_020836 | 1 | Weak                                        |           | YES<br>YES        |                                     | J-014095-09<br>J-014095-10<br>J-014095-11<br>J-014095-12 | AGGACAA<br>CCAAGGU<br>CCACACAC<br>CUGAAGU  | 2 | Weak+     |               | YES | 14q32.2  |
| KIAA1596  | 57697  | XM_048128 | 4 | Medium<br>Weak+<br>Medium<br>Strong<br>Weak |           | YES<br>YES        | Decreased<br>Decreased              | J-021955-05<br>J-021955-06<br>J-021955-07<br>J-021955-08 | GGGUAGA<br>GAGAGGA<br>AAACAGAC<br>GCAUGUA  | 3 | Cytotoxic | Weak          |     | 14q21.3  |
| KIAA1679  | 80731  | XM_046570 | 2 | Weak+                                       |           | YES               |                                     | J-022909-05<br>J-022909-06<br>J-022909-07<br>J-022909-08 | GAGCAUC<br>CAACUGG<br>CGGACUC<br>GUACCAG   | 3 | Medium    |               |     | 2q21-q22 |
| KIAA1713  | 80816  | XM_290811 | 1 | Weak                                        |           | YES<br>YES<br>YES |                                     | J-023422-05<br>J-023422-06<br>J-023422-07<br>J-023422-08 | GAAUUGC<br>GGACACA<br>GAUAGAA<br>GCAUAGC   | 0 | Cytotoxic | Did not score |     | 18q11    |
| KIAA2010  | 55671  | NM_032560 | 2 | Weak<br>Weak                                |           |                   |                                     | J-019093-05<br>J-019093-06<br>J-019093-07<br>J-019093-08 | GCGAAGU<br>GCUAGCC<br>GCUUAGA<br>CGACGGU   | 1 | Weak+     |               |     | 14q32.12 |
| KIAA2018  | 205717 | XM_291062 | 0 |                                             |           | YES<br>YES<br>YES |                                     | J-023709-09<br>J-023709-10<br>J-023709-11<br>J-023709-12 | AGACAAU<br>AUUAAUAC<br>AGAAAUAC<br>UGGCAUG | 1 | Weak      |               | YES | 3q13.2   |
| KLHDC5    | 57542  | NM_020782 | 1 | Weak                                        |           | YES               |                                     | J-027054-05<br>J-027054-06<br>J-027054-07<br>J-027054-08 | GGUCUUA<br>GGUCUAA<br>GGACAUAA<br>GCAGAAA  | 2 | Weak+     |               | YES | 12p11.22 |
| LOC128710 | 128710 | XM_059267 | 0 |                                             |           | YES<br>YES        |                                     | J-024240-09<br>J-024240-10<br>J-024240-11<br>J-024240-12 | UCUUGGA<br>AGUGCAA<br>AAAGCAG<br>CAAGAGAC  | 3 | Weak+     |               |     | 20p12.2  |
| LOC144776 | 144776 | XM_375033 | 0 |                                             |           | YES               | Increased                           | J-030181-09<br>J-030181-10<br>J-030181-11<br>J-030181-12 | CAUUAUAC<br>GAUGGAG<br>CGGAGAG<br>GCGUCAU  | 1 | Weak+     |               |     | 13q31.3  |
| LOC150759 | 150759 | NM_175853 | 1 | Weak                                        |           | YES<br>YES<br>YES | Increased                           | J-017982-05<br>J-017982-06<br>J-017982-07<br>J-017982-08 | GCAACAC<br>GAAACAA<br>CUAGAAA<br>GACAAAAC  | 3 | Strong    |               |     | 2q11.2   |
| LOC155036 | 155036 | XM_376722 | 0 |                                             |           | YES               |                                     | J-028875-05<br>J-028875-06<br>J-028875-07<br>J-028875-08 | CAUCCGG<br>UAACUGA<br>UUACGGA<br>GGAAGUG   | 2 | Medium    |               |     | 7q36.1   |
| LOC256223 | 256223 | XM_170840 | 1 | Weak+                                       |           | YES               | Increased<br>Decreased              | J-023341-09<br>J-023341-10<br>J-023341-11<br>J-023341-12 | UCCUGGG<br>CCUAAAU<br>GGGCCUG<br>GCUCUUA   | 2 | Medium    |               |     | 17p11.2  |
| LOC284749 | 284749 | XM_378983 | 0 |                                             |           | YES               |                                     | J-031307-05<br>J-031307-06<br>J-031307-07<br>J-031307-08 | GCAGCAC<br>GUACAUU<br>GCACAGAA<br>GGAAGGG  | 2 | Weak+     |               |     | 20q13.13 |
| LOC285045 | 285045 | XM_379086 | 1 | Weak<br>Weak                                | untreated | YES<br>YES        | Decreased<br>Increased              | J-027824-05<br>J-027824-06<br>J-027824-07<br>J-027824-08 | GAAGGCA<br>GCUGGGA<br>ACAGUGG<br>CAACUUG   | 3 | Weak+     |               |     | 2p22.3   |
| LOC339448 | 339448 | NM_207356 | 1 | Weak                                        |           |                   | Decreased<br>Increased<br>Increased | J-021859-09<br>J-021859-10<br>J-021859-11<br>J-021859-12 | CCUAAGA<br>CGGCCAG<br>GCAGACG<br>GGGCUUA   | 2 | Weak+     |               |     | 1p36.32  |

|           |        |           |   |                                    |                   |                        |                                                          |                                           |   |                  |               |     |            |
|-----------|--------|-----------|---|------------------------------------|-------------------|------------------------|----------------------------------------------------------|-------------------------------------------|---|------------------|---------------|-----|------------|
| LOC339896 | 339896 | NM_207359 | 1 | Weak+                              | YES               | Increased<br>Increased | J-023510-09<br>J-023510-10<br>J-023510-11<br>J-023510-12 | GUGCACA<br>CAGCUUU<br>GGAAGAA<br>CCUGGAU  | 3 | Weak+            |               |     | 3p24.1-p23 |
| LOC345462 | 345462 | XM_293828 | 0 |                                    |                   |                        | J-024604-09<br>J-024604-10<br>J-024604-11<br>J-024604-12 | GGGUCAA<br>CGUUAAU<br>ACUUCAA<br>GGUCUAA  | 2 | Weak+            |               |     | 5q35.3     |
| LOC388002 | 388002 | XM_373600 | 1 | Weak                               | YES               | Decreased<br>Increased | J-030313-09<br>J-030313-10<br>J-030313-11<br>J-030313-12 | GCAUAUU<br>GGUAUUG<br>GCACAAU<br>GACAAUG  | 2 | Medium           |               |     | 14q31.1    |
| LOC389101 | 389101 | XM_371622 | 1 | Weak                               | YES<br>YES        | Increased<br>Increased | J-028088-05<br>J-028088-06<br>J-028088-07<br>J-028088-08 | GAGGUGU<br>AAAGAUG<br>GGAAGGC<br>GCACGUC  | 3 | Strong           |               |     | 3p22.3     |
| LOC399818 | 399818 | NM_212554 | 2 | Medium<br>Weak+                    | YES               | Increased              | J-032543-09<br>J-032543-10<br>J-032543-11<br>J-032543-12 | CUGCAAA<br>AUUAAGC<br>GAGAGUA<br>GGGCUAA  | 3 | Medium           |               |     | 10q26.13   |
| LOC400121 | 400121 | XM_375018 | 2 | Medium<br>Weak                     | YES               | Increased              | J-030216-05<br>J-030216-06<br>J-030216-07<br>J-030216-08 | GGAAUAU<br>GAACUGU<br>GUAGAUC<br>GAAGGGA  | 1 | Medium           |               |     | 13q13.3    |
| LOC400526 | 400526 | XM_375344 | 1 | Medium                             | YES               |                        | J-030743-05<br>J-030743-06<br>J-030743-07<br>J-030743-08 | CCAAGCA<br>GCUUAAU<br>GACAUUU<br>CAAAGGA  | 3 | Strong           |               |     | 16p11.2    |
| LOC400643 | 400643 | XM_378738 | 0 |                                    | YES<br>YES        | Increased<br>Increased | J-031017-05<br>J-031017-06<br>J-031017-07<br>J-031017-08 | UUCCAAA<br>CCACAUAC<br>GAACGUG<br>CCACCGA | 1 | Weak+            |               |     | 18p11.31   |
| LOC401440 | 401440 | XM_379539 | 2 | Medium<br>Weak                     | YES               | Decreased<br>Increased | J-029252-05<br>J-029252-06<br>J-029252-07<br>J-029252-08 | GAAAAGC<br>CCAGUUG<br>GAAGAAA<br>UGUCUCU  | 2 | Medium           |               |     | 5q35.3     |
| LOC401471 | 401471 | XM_379595 | 0 |                                    | YES               | Increased              | J-029346-05<br>J-029346-06<br>J-029346-07<br>J-029346-08 | GAGUUGA<br>GCAAUUC<br>GCAUGUU<br>GGAAGAA  | 1 | Weak+            |               |     | 8q22.3     |
| LOC90120  | 90120  | XM_379680 | 1 | Medium<br>Medium<br>Medium         | YES               | Decreased              | J-029408-05<br>J-029408-06<br>J-029408-07<br>J-029408-08 | GCUUCAU<br>GGUGCGA<br>CCUCAUU<br>ACAACAAC | 3 | Cytotoxic Bypass | Weak+         |     | 9q34.3     |
| LRR34     | 151827 | NM_153353 | 3 | Medium<br>Medium<br>Weak           | YES<br>YES<br>YES | Decreased<br>Increased | J-016744-09<br>J-016744-10<br>J-016744-11<br>J-016744-12 | CUACAUAA<br>GAUGAGG<br>CGUUGUC<br>GGUUUGG | 2 | Strong           |               |     | 3q26.2     |
| MGC13204  | 83695  | NM_031465 | 4 | Medium<br>Weak+<br>Medium<br>Weak+ | YES               | Decreased<br>Decreased | J-014736-09<br>J-014736-10<br>J-014736-11<br>J-014736-12 | GCGAGAC<br>CGAGAGU<br>CGAGGAC<br>GUUCAGA  | 2 | Cytotoxic        | Did not score | YES | 12p13.33   |
| MGC16943  | 112479 | NM_080663 | 0 |                                    |                   | Increased              | J-015252-09<br>J-015252-10<br>J-015252-11<br>J-015252-12 | GCAAAUG<br>GAGAAA<br>AAUAGAA<br>GCGGCAG   | 3 | Strong           |               |     | 16p12.2    |
| MGC26710  | 150280 | NM_152510 | 0 |                                    |                   | Decreased<br>Decreased | J-016850-09<br>J-016850-10<br>J-016850-11<br>J-016850-12 | GAAAAGA<br>GUGUUCU<br>CCAAUAG<br>CCAAUUC  | 1 | Weak+            |               |     | 22q12.2    |
| MLLT4     | 4301   | NM_005936 | 1 | Weak+                              | YES               | Increased              | J-020075-05<br>J-020075-06<br>J-020075-07<br>J-020075-08 | UGAGAAA<br>GAACGAA<br>CCAAUUG<br>GUUAAGG  | 3 | Weak+            |               | YES | 6q27       |

|          |        |           |   |                          |  |                   |                                                  |                                                          |                                          |   |                  |               |     |             |
|----------|--------|-----------|---|--------------------------|--|-------------------|--------------------------------------------------|----------------------------------------------------------|------------------------------------------|---|------------------|---------------|-----|-------------|
| MYST2    | 11143  | NM_007067 | 3 | Weak<br>Medium<br>Weak+  |  |                   | Increased<br>Increased                           | J-017668-05<br>J-017668-06<br>J-017668-07<br>J-017668-08 | GAACCGA<br>GAGGGAA<br>UAGGACA<br>GGCAAGA | 1 | Cytotoxic        | Did not score | YES | 17q21.32    |
| NARF     | 26502  | NM_012336 | 2 | Medium<br>Weak+          |  | YES<br>YES<br>YES | Increased<br>Increased                           | J-012465-09<br>J-012465-10<br>J-012465-11<br>J-012465-12 | CGACGAU<br>CAGACGG<br>GGCGCU<br>GUGAAGG  | 2 | Cytotoxic Bypass | Did not score | YES | 17q25.3     |
| NRF1     | 4899   | NM_005011 | 1 | Weak                     |  | YES               | Decreased<br>Decreased<br>Decreased              | J-017924-05<br>J-017924-06<br>J-017924-07<br>J-017924-08 | GAAACGG<br>UAGUAUA<br>CACAUUG<br>GCUAUUG | 3 | Strong           |               |     | 7q32        |
| NYD-TSP1 | 84654  | NM_032567 | 0 |                          |  |                   | Increased                                        | J-015845-09<br>J-015845-10<br>J-015845-11<br>J-015845-12 | GAAAUAA<br>AUAAUGA<br>GCACAGA<br>GCAGAAC | 2 | Weak+            |               |     | 5q14.1      |
| PAPLN    | 89932  | XM_370765 | 3 | Weak<br>Weak<br>Weak+    |  |                   | Increased<br>Increased                           | J-030307-05<br>J-030307-06<br>J-030307-07<br>J-030307-08 | GCACGCU<br>GGAGAGU<br>GGCCAAC<br>GGAGCGG | 3 | Weak             |               |     | 14q24.2     |
| PDE6D    | 5147   | NM_002601 | 1 | Weak<br>Weak+            |  | YES<br>YES        | Increased<br>Increased<br>Increased              | J-004310-09<br>J-004310-10<br>J-004310-11<br>J-004310-12 | AUCCUA<br>GAAGUA<br>GCAAGCG<br>UAAAUUG   | 2 | Medium           |               |     | 2q35-q36    |
| PHGDHL1  | 337867 | NM_177967 | 2 | Weak<br>Weak+            |  |                   | Increased                                        | J-017914-09<br>J-017914-10<br>J-017914-11<br>J-017914-12 | CCUUUAC<br>CAAAUGA<br>GCACAAG<br>AGGAAGU | 0 | Strong           |               |     | 13q32.3     |
| PLS1     | 5357   | NM_002670 | 0 |                          |  | YES               | Increased<br>Increased                           | J-011356-09<br>J-011356-10<br>J-011356-11<br>J-011356-12 | CUACAAG<br>CAGCAAA<br>AGGAUUU<br>GGUCAAC | 2 | Strong           |               |     | 3q23        |
| PPARBP   | 5469   | NM_004774 | 0 |                          |  | YES<br>YES        | Decreased<br>Decreased<br>Decreased<br>Decreased | J-004126-10<br>J-004126-11<br>J-004126-12<br>J-004126-13 | GAAUAAU<br>UCUCUAU<br>CCCAGUA<br>AAUAGAC | 2 | Medium           |               | YES | 17q12-q21.1 |
| PPM1A    | 5494   | NM_021003 | 0 |                          |  |                   | Increased<br>Increased                           | J-009574-06<br>J-009574-07<br>J-009574-08<br>J-009574-09 | GUUCUA<br>GAUGAAC<br>GGACUUG<br>UCACCAU  | 2 | Weak             |               |     | 14q23.1     |
| PPM1L    | 151742 | NM_139245 | 0 |                          |  | YES               | Increased                                        | J-008679-05<br>J-008679-06<br>J-008679-07<br>J-008679-08 | GAGCAUA<br>GGAGGAC<br>GAGAGCA<br>GGCACAA | 2 | Medium           |               |     | 3q26.1      |
| PRICKLE2 | 166336 | NM_198859 | 1 | Weak                     |  | YES               | Decreased                                        | J-023495-05<br>J-023495-06<br>J-023495-07<br>J-023495-08 | GGAAGAG<br>CAGGAGA<br>CAAAGAC<br>GCGAUGA | 2 | Medium           |               |     | 3p14.1      |
| PTPN21   | 11099  | NM_007039 | 0 |                          |  |                   | Increased<br>Increased                           | J-009379-06<br>J-009379-07<br>J-009379-08<br>J-009379-09 | GAGAAGA<br>GAGCGUG<br>GCACCA<br>GUUCGAC  | 1 | Weak+            |               |     | 14q31.3     |
| RAP1B    | 5908   | NM_015646 | 1 | Medium<br>Weak<br>Medium |  | YES               | Decreased                                        | J-010364-06<br>J-010364-07<br>J-010364-08<br>J-010364-09 | AAAAUAC<br>GGACAAG<br>GACCUAG<br>CAGCUGC | 2 | Medium           |               |     | 12q14       |
| RARRES3  | 5920   | NM_004585 | 3 | Weak<br>Weak+<br>Medium  |  | YES<br>YES        | Increased                                        | J-011889-06<br>J-011889-07<br>J-011889-08<br>J-011889-09 | CGAAGGA<br>UAUAGGA<br>UGGCAAG<br>GCAGGAA | 2 | Weak+            |               |     | 11q23       |
| RBBP8    | 5932   | NM_002894 | 3 | Weak<br>Weak<br>Weak+    |  | YES               | Decreased<br>Decreased                           | J-011376-05<br>J-011376-06<br>J-011376-07<br>J-011376-08 | GGAGCUA<br>GAGGUUA<br>GAACAGA<br>GCACGUU | 2 | Cytotoxic Bypass | Did not score | YES | 18q11.2     |

|          |        |           |   |                                     |  |                          |                                                  |                                                          |                                          |   |                  |               |     |                    |
|----------|--------|-----------|---|-------------------------------------|--|--------------------------|--------------------------------------------------|----------------------------------------------------------|------------------------------------------|---|------------------|---------------|-----|--------------------|
| RBMS1    | 5937   | NM_002897 | 2 | Medium<br>Medium                    |  | YES                      | Decreased                                        | J-011377-05<br>J-011377-06<br>J-011377-07<br>J-011377-08 | GAUGCAA<br>GAAUGAC<br>GAAGCUC<br>GAACCUU | 1 | Medium           |               |     | 2q24.2             |
| RFX2     | 5990   | NM_000635 | 0 |                                     |  | YES<br>YES               | Increased<br>Decreased                           | J-011129-05<br>J-011129-06<br>J-011129-07<br>J-011129-08 | UGACACA<br>GAACAGC<br>GCACAGC<br>GAGAGAC | 2 | Medium           |               |     | 19p13.3-<br>p13.2  |
| RNF125   | 54941  | NM_017831 | 0 |                                     |  | YES                      | Decreased                                        | J-007005-05<br>J-007005-06<br>J-007005-07<br>J-007005-08 | GAUUAUA<br>UUAGACC<br>GCAGCAA<br>UUUUAUA | 1 | Weak+            |               |     | 18q12.1            |
| SHFM1    | 7979   | NM_006304 | 4 | Medium<br>Medium<br>Weak+<br>Strong |  | YES<br>YES<br>YES<br>YES | Decreased<br>Decreased<br>Decreased<br>Decreased | J-021353-05<br>J-021353-06<br>J-021353-07<br>J-021353-08 | GUUUAUA<br>AGACUGG<br>GUUACGA<br>CAAUGUA | 3 | Medium           |               |     | 7q21.3-<br>q22.1   |
| SMARCAD1 | 56916  | NM_020159 | 3 | Weak<br>Weak+<br>Medium             |  |                          | Decreased<br>Increased                           | J-013801-05<br>J-013801-06<br>J-013801-07<br>J-013801-08 | CCACACA<br>GAGGAUG<br>GGCCAAU<br>GCACGUA | 1 | Weak+            | YES           |     | 4q22-q23           |
| SMARCD2  | 6603   | NM_003077 | 1 | Weak<br>Weak+                       |  | YES                      | Increased<br>Increased                           | J-011393-05<br>J-011393-06<br>J-011393-07<br>J-011393-08 | GGGAGUA<br>GAGACGA<br>GAACAGG<br>GGAUCUA | 1 | Weak+            |               |     | 17q23-q24          |
| SMARCD3  | 6604   | NM_003078 | 1 | Weak<br>Weak+                       |  | YES<br>YES               | Increased                                        | J-009459-06<br>J-009459-07<br>J-009459-08<br>J-009459-09 | GAAGAAG<br>UGACAGA<br>GGCAGUA<br>GAUCAAA | 1 | Weak             |               |     | 7q35-q36           |
| SMC5L1   | 23137  | NM_015110 | 0 |                                     |  | YES                      | Increased                                        | J-014117-09<br>J-014117-10<br>J-014117-11<br>J-014117-12 | CGAAUAU<br>GAAAGAA<br>GAAACUU<br>GAACAGG | 1 | Medium           |               |     | 9q21.11            |
| STK22D   | 83942  | NM_032028 | 0 |                                     |  |                          | Increased                                        | J-005038-10<br>J-005038-11<br>J-005038-12<br>J-005038-13 | CCAGCAA<br>GGAUGAC<br>GGACGAA<br>GAAGUUC | 2 | Medium           |               |     | 5q22.2             |
| SYT14L   | 83851  | NM_031914 | 0 |                                     |  |                          | Increased<br>Increased<br>Increased              | J-014750-09<br>J-014750-10<br>J-014750-11<br>J-014750-12 | AGGCGUA<br>CGUUGAU<br>GGUCAAG<br>UCCGAAA | 3 | Weak+            |               |     | 14q23.2            |
| TOPBP1   | 11073  | NM_007027 | 1 | Strong                              |  | YES<br>YES<br>YES        | Decreased<br>Decreased                           | J-012358-08<br>J-012358-09<br>J-012358-10<br>J-012358-11 | ACAAUAU<br>ACACUAU<br>GAGCCGA<br>CCACAGU |   | Did not score    | YES           |     | 3q22.1             |
| TXNDC2   | 84203  | NM_032243 | 1 | Weak                                |  | YES<br>YES               | Increased                                        | J-018662-09<br>J-018662-10<br>J-018662-11<br>J-018662-12 | CAGCCCA<br>GGACAAG<br>AGCAGUC<br>ACAGGAG | 2 | Cytotoxic        | Did not score |     | 18p11.31-<br>p11.2 |
| USP11    | 8237   | NM_004651 | 0 |                                     |  |                          | Increased<br>Decreased                           | J-006063-05<br>J-006063-06<br>J-006063-07<br>J-006063-08 | GCGCACA<br>GAGAAGC<br>GGACCGU<br>GAAGAAG | 1 | Medium           |               |     | Xp11.23            |
| WDHD1    | 11169  | NM_007086 | 0 |                                     |  | YES                      | Decreased                                        | J-019780-09<br>J-019780-10<br>J-019780-11<br>J-019780-12 | CUUGUAU<br>UUGUAAA<br>CAGAAGG<br>GGUUAUA | 2 | Cytotoxic Bypass | Did not score | YES | 14q22.3            |
| WDR40B   | 139170 | NM_178470 | 0 |                                     |  |                          | Decreased<br>Decreased<br>Decreased              | J-017873-09<br>J-017873-10<br>J-017873-11<br>J-017873-12 | GAGCUAA<br>CUUAAGA<br>GAAUUAU<br>CAUUCCA | 2 | Medium           |               |     | Xq25               |
| ZNF307   | 387032 | NM_019110 | 0 |                                     |  |                          | Decreased<br>Increased                           | J-032209-09<br>J-032209-10<br>J-032209-11<br>J-032209-12 | AGUCAGG<br>CACUAUA<br>CCGAGAA<br>GAGAGAA | 2 | Medium           | YES           |     | 6p21.33-<br>p21.31 |

|         |        |           |   |  |  |                   |           |                                                                                           |   |        |  |          |
|---------|--------|-----------|---|--|--|-------------------|-----------|-------------------------------------------------------------------------------------------|---|--------|--|----------|
| ZNF514  | 84874  | NM_032788 | 0 |  |  | YES               | Increased | J-014996-09 GAUCAGAG<br>J-014996-10 CGGUUGU<br>J-014996-11 GAUCAGU<br>J-014996-12 CGUUAGA | 1 | Medium |  | 2q11.1   |
| ZNF585A | 199704 | NM_152655 | 0 |  |  | YES<br>YES<br>YES | Increased | J-016432-09 CCUAAGA<br>J-016432-10 GAACAAU<br>J-016432-11 GGGAAGA<br>J-016432-12 CAAGAAA  | 1 | Weak+  |  | 19q13.12 |
| ZNF616  | 90317  | XM_030892 | 0 |  |  |                   | Decreased | J-023805-09 CAGCAUA<br>J-023805-10 UGACAAG<br>J-023805-11 UGAGAAA<br>J-023805-12 CGGAGAA  | 2 | Weak+  |  | 19q13.33 |
